# Supplementary material for: Myeloid Cell Replacement Therapy Improves Function in Friedreich Ataxia Mice by Intercellular Mitochondrial Transfer
Source: Research Square preprint supplement (doi:10.21203/rs.3.rs-5932916/v1), 2025-02-11
Supplement: Supplementary file 1 [file 011e7ee1cc907f2b43d2f748.xlsx]

## Sheet: Summary
GO	Category	Description	Count	%	Log10(P)	Log10(q)
WP310	WikiPathways	mRNA processing	13	26	-10.57	-6.31
GO:0043489	GO Biological Processes	RNA stabilization	4	8	-4.66	-1.48
GO:0006457	GO Biological Processes	protein folding	5	10	-4.35	-1.33
R-MMU-168638	Reactome Gene Sets	NOD1/2 Signaling Pathway	3	6	-4.33	-1.33
R-MMU-156827	Reactome Gene Sets	L13a-mediated translational silencing of Ceruloplasmin expression	4	8	-3.88	-0.95
GO:0005977	GO Biological Processes	glycogen metabolic process	3	6	-3.34	-0.68
GO:0019058	GO Biological Processes	viral life cycle	3	6	-2.82	-0.3
mmu04137	KEGG Pathway	Mitophagy - animal - Mus musculus (house mouse)	3	6	-2.77	-0.27
GO:0090150	GO Biological Processes	establishment of protein localization to membrane	4	8	-2.74	-0.26
GO:0019218	GO Biological Processes	regulation of steroid metabolic process	3	6	-2.51	-0.09
GO:0031507	GO Biological Processes	heterochromatin formation	3	6	-2.37	0
GO:0006997	GO Biological Processes	nucleus organization	3	6	-2.35	0
GO:0051052	GO Biological Processes	regulation of DNA metabolic process	5	10	-2.19	0

## Sheet: Annotation
MyList	Gene ID	Type	Tax ID	Homologene Gene ID	Homologene Gene Tax ID	Gene Symbol	Description	Biological Process (GO)	Kinase Class (UniProt)	WP310 mRNA processing	GO:0043489 RNA stabilization	GO:0006457 protein folding	R-MMU-168638 NOD1/2 Signaling Pathway	R-MMU-156827 L13a-mediated translational si	GO:0005977 glycogen metabolic process	GO:0019058 viral life cycle	mmu04137 Mitophagy - animal - Mus muscu	GO:0090150 establishment of protein local	GO:0019218 regulation of steroid metaboli	GO:0031507 heterochromatin formation	GO:0006997 nucleus organization	GO:0051052 regulation of DNA metabolic pr
Gabarapl1	57436	symbol	M. musculus	57436	M. musculus	Gabarapl1	GABA type A receptor associated protein like 1	GO:0061753 substrate localization to autophagosome;GO:0006995 cellular response to nitrogen starvation;GO:0043562 cellular response to nitrogen levels		0	0	0	1	0	1	0	1	0	0	0	0	0
Cbx3	12417	symbol	M. musculus	12417	M. musculus	Cbx3	chromobox 3	GO:0031507 heterochromatin formation;GO:0045814 negative regulation of gene expression, epigenetic;GO:0048511 rhythmic process		0	0	0	0	0	0	0	0	0	0	1	0	0
Rbis	69126	symbol	M. musculus	69126	M. musculus	Rbis	ribosomal biogenesis factor	GO:0042254 ribosome biogenesis;GO:0022613 ribonucleoprotein complex biogenesis;GO:0044085 cellular component biogenesis		0	0	0	0	0	0	0	0	0	0	0	0	0
Chmp4b	75608	symbol	M. musculus	75608	M. musculus	Chmp4b	charged multivesicular body protein 4B	GO:0090611 ubiquitin-independent protein catabolic process via the multivesicular body sorting pathway;GO:0036438 maintenance of lens transparency;GO:0046761 viral budding from plasma membrane		0	0	0	1	0	0	1	0	1	0	0	1	0
Tcea1	21399	symbol	M. musculus	21399	M. musculus	Tcea1	transcription elongation factor A (SII) 1	GO:0006368 transcription elongation by RNA polymerase II;GO:0006354 DNA-templated transcription elongation;GO:0030218 erythrocyte differentiation		0	0	0	1	0	0	0	0	0	0	0	0	0
Ypel3	66090	symbol	M. musculus	66090	M. musculus	Ypel3	yippee like 3	GO:2000774 positive regulation of cellular senescence;GO:2000772 regulation of cellular senescence;GO:0006915 apoptotic process		0	0	0	0	0	0	0	0	0	0	0	0	0
Cbx1	12412	symbol	M. musculus	12412	M. musculus	Cbx1	chromobox 1	GO:0031507 heterochromatin formation;GO:0045814 negative regulation of gene expression, epigenetic;GO:0040029 epigenetic regulation of gene expression		0	0	0	0	0	0	0	0	0	0	1	0	0
Atp6ap1	54411	symbol	M. musculus	54411	M. musculus	Atp6ap1	ATPase, H+ transporting, lysosomal accessory protein 1	GO:0036035 osteoclast development;GO:0098751 bone cell development;GO:0036295 cellular response to increased oxygen levels		0	0	0	0	0	0	0	0	1	0	0	0	0
Dek	110052	symbol	M. musculus	110052	M. musculus	Dek	DEK proto-oncogene	GO:0044838 cell quiescence;GO:0045945 positive regulation of transcription by RNA polymerase III;GO:0006359 regulation of transcription by RNA polymerase III		0	0	0	0	0	0	0	0	0	0	1	0	1
Asah1	11886	symbol	M. musculus	11886	M. musculus	Asah1	N-acylsphingosine amidohydrolase 1	GO:0046512 sphingosine biosynthetic process;GO:0046520 sphingoid biosynthetic process;GO:0046514 ceramide catabolic process		0	0	0	0	0	0	0	0	0	1	0	0	0
Aamp	227290	symbol	M. musculus	227290	M. musculus	Aamp	angio-associated migratory protein			0	0	0	1	0	0	0	0	0	0	0	0	0
Ube2e3	22193	symbol	M. musculus	22193	M. musculus	Ube2e3	ubiquitin-conjugating enzyme E2E 3	GO:0070979 protein K11-linked ubiquitination;GO:0070534 protein K63-linked ubiquitination;GO:0070936 protein K48-linked ubiquitination		0	0	0	1	0	0	0	0	0	0	0	0	0
Ppp1r2	66849	symbol	M. musculus	66849	M. musculus	Ppp1r2	protein phosphatase 1, regulatory inhibitor subunit 2	GO:0043666 regulation of phosphoprotein phosphatase activity;GO:0005977 glycogen metabolic process;GO:0010921 regulation of phosphatase activity		0	0	0	0	0	1	0	0	0	0	0	0	0
Papss1	23971	symbol	M. musculus	23971	M. musculus	Papss1	3'-phosphoadenosine 5'-phosphosulfate synthase 1	GO:0034036 purine ribonucleoside bisphosphate biosynthetic process;GO:0050428 3'-phosphoadenosine 5'-phosphosulfate biosynthetic process;GO:0000103 sulfate assimilation	yes	0	0	0	0	0	0	0	0	0	0	0	0	0
Cope	59042	symbol	M. musculus	59042	M. musculus	Cope	coatomer protein complex, subunit epsilon	GO:0099612 protein localization to axon;GO:0006891 intra-Golgi vesicle-mediated transport;GO:0006890 retrograde vesicle-mediated transport, Golgi to endoplasmic reticulum		0	0	0	0	0	0	0	0	1	0	0	0	0
4933434E20Rik	99650	symbol	M. musculus	99650	M. musculus	4933434E20Rik	RIKEN cDNA 4933434E20 gene	GO:0006909 phagocytosis;GO:0006897 endocytosis;GO:0001701 in utero embryonic development		0	0	0	0	0	0	0	0	0	0	0	0	0
Vamp2	22318	symbol	M. musculus	22318	M. musculus	Vamp2	vesicle-associated membrane protein 2	GO:0002278 eosinophil activation involved in immune response;GO:0043307 eosinophil activation;GO:0043308 eosinophil degranulation		0	0	0	0	0	0	0	0	1	0	0	0	0
Tsc22d4	78829	symbol	M. musculus	78829	M. musculus	Tsc22d4	Tsc22 domain family, member 4	GO:0006970 response to osmotic stress;GO:0009628 response to abiotic stimulus;GO:0006950 response to stress		0	0	0	0	0	0	0	0	0	0	0	0	0
Abhd12	76192	symbol	M. musculus	76192	M. musculus	Abhd12	abhydrolase domain containing 12	GO:0006660 phosphatidylserine catabolic process;GO:0052651 monoacylglycerol catabolic process;GO:0002084 protein depalmitoylation		0	0	0	1	0	0	0	0	0	0	0	0	0
Ptms	69202	symbol	M. musculus	69202	M. musculus	Ptms	parathymosin	GO:0043066 negative regulation of apoptotic process;GO:0043069 negative regulation of programmed cell death;GO:0045944 positive regulation of transcription by RNA polymerase II		0	0	0	0	0	0	0	0	0	0	0	0	0
Plp1	18823	symbol	M. musculus	18823	M. musculus	Plp1	proteolipid protein (myelin) 1	GO:0098990 AMPA selective glutamate receptor signaling pathway;GO:0035235 ionotropic glutamate receptor signaling pathway;GO:0042759 long-chain fatty acid biosynthetic process		0	0	0	0	0	0	0	0	0	0	0	0	0
Ube2n	93765	symbol	M. musculus	93765	M. musculus	Ube2n	ubiquitin-conjugating enzyme E2N	GO:1902523 positive regulation of protein K63-linked ubiquitination;GO:1900044 regulation of protein K63-linked ubiquitination;GO:0000729 DNA double-strand break processing		0	0	0	1	0	0	0	0	0	0	0	0	1
Idh3b	170718	symbol	M. musculus	170718	M. musculus	Idh3b	isocitrate dehydrogenase 3 (NAD+) beta	GO:0006102 isocitrate metabolic process;GO:0072350 tricarboxylic acid metabolic process;GO:0006103 2-oxoglutarate metabolic process		0	0	0	0	0	1	0	0	0	0	0	0	0
Acp1	11431	symbol	M. musculus	11431	M. musculus	Acp1	acid phosphatase 1, soluble	GO:0006470 protein dephosphorylation;GO:0016311 dephosphorylation;GO:0006796 phosphate-containing compound metabolic process		0	0	0	0	0	0	0	0	0	0	0	0	0
Tmed2	56334	symbol	M. musculus	56334	M. musculus	Tmed2	transmembrane p24 trafficking protein 2	GO:0090073 positive regulation of protein homodimerization activity;GO:0043496 regulation of protein homodimerization activity;GO:1903912 negative regulation of endoplasmic reticulum stress-induced eIF2 alpha phosphorylation		0	0	1	0	0	0	0	0	1	0	0	0	1
Tmco1	68944	symbol	M. musculus	68944	M. musculus	Tmco1	transmembrane and coiled-coil domains 1	GO:0160063 multi-pass transmembrane protein insertion into ER membrane;GO:0006983 ER overload response;GO:0032469 endoplasmic reticulum calcium ion homeostasis		0	0	1	0	0	0	0	0	1	0	0	0	0
Selenof	93684	symbol	M. musculus	93684	M. musculus	Selenof	selenoprotein F	GO:0035092 sperm DNA condensation;GO:0007289 spermatid nucleus differentiation;GO:0051084 'de novo' post-translational protein folding		0	0	1	0	0	0	0	0	0	0	1	1	0
Fkbp8	14232	symbol	M. musculus	14232	M. musculus	Fkbp8	FK506 binding protein 8	GO:0021904 dorsal/ventral neural tube patterning;GO:1901524 regulation of mitophagy;GO:1903146 regulation of autophagy of mitochondrion		0	0	1	0	0	0	0	1	1	0	0	0	0
Sept7	235072	gene_synonym	M. musculus	235072	M. musculus	Septin7	septin 7	GO:0031270 pseudopodium retraction;GO:0031268 pseudopodium organization;GO:1902857 positive regulation of non-motile cilium assembly		0	0	1	0	0	0	0	0	0	0	0	0	0
Dnajb2	56812	symbol	M. musculus	56812	M. musculus	Dnajb2	DnaJ heat shock protein family (Hsp40) member B2	GO:0090086 negative regulation of protein deubiquitination;GO:1903644 regulation of chaperone-mediated protein folding;GO:0090084 negative regulation of inclusion body assembly		0	0	1	1	0	0	0	0	0	0	0	0	0
Ssr1	107513	symbol	M. musculus	107513	M. musculus	Ssr1	signal sequence receptor, alpha			0	0	1	0	0	0	0	0	0	0	0	0	0
Hmgn1	15312	symbol	M. musculus	15312	M. musculus	Hmgn1	high mobility group nucleosomal binding domain 1	GO:1901664 regulation of NAD+ ADP-ribosyltransferase activity;GO:1901666 positive regulation of NAD+ ADP-ribosyltransferase activity;GO:0000720 pyrimidine dimer repair by nucleotide-excision repair		0	1	0	0	0	0	0	0	0	0	1	0	0
Stub1	56424	symbol	M. musculus	56424	M. musculus	Stub1	STIP1 homology and U-Box containing protein 1	GO:0090034 regulation of chaperone-mediated protein complex assembly;GO:0090035 positive regulation of chaperone-mediated protein complex assembly;GO:0061684 chaperone-mediated autophagy		0	1	1	1	0	0	0	0	0	1	0	0	1
Pcbp1	23983	symbol	M. musculus	23983	M. musculus	Pcbp1	poly(rC) binding protein 1	GO:0039694 viral RNA genome replication;GO:0019079 viral genome replication;GO:0019058 viral life cycle		1	0	0	0	0	0	1	0	0	0	0	0	0
Pcbp2	18521	symbol	M. musculus	18521	M. musculus	Pcbp2	poly(rC) binding protein 2	GO:0039694 viral RNA genome replication;GO:0019079 viral genome replication;GO:0075522 IRES-dependent viral translational initiation		1	0	0	1	0	0	1	0	0	0	0	0	0
Hnrnpa3	229279	symbol	M. musculus	229279	M. musculus	Hnrnpa3	heterogeneous nuclear ribonucleoprotein A3	GO:0051028 mRNA transport;GO:0050657 nucleic acid transport;GO:0050658 RNA transport		1	0	0	0	0	0	0	0	0	0	0	0	0
Ddx5	13207	symbol	M. musculus	13207	M. musculus	Ddx5	DEAD box helicase 5	GO:0061614 miRNA transcription;GO:0031053 primary miRNA processing;GO:0043517 positive regulation of DNA damage response, signal transduction by p53 class mediator		1	0	0	0	0	0	0	0	1	0	0	0	1
Sf1	22668	symbol	M. musculus	22668	M. musculus	Sf1	splicing factor 1	GO:0033327 Leydig cell differentiation;GO:0030238 male sex determination;GO:0030575 nuclear body organization		1	0	0	0	0	0	0	0	0	1	0	1	0
Ewsr1	14030	symbol	M. musculus	14030	M. musculus	Ewsr1	Ewing sarcoma breakpoint region 1	GO:0006355 regulation of DNA-templated transcription;GO:2001141 regulation of RNA biosynthetic process;GO:0051252 regulation of RNA metabolic process		1	0	0	0	0	0	0	0	0	0	0	0	0
Srsf2	20382	symbol	M. musculus	20382	M. musculus	Srsf2	serine and arginine-rich splicing factor 2	GO:0000381 regulation of alternative mRNA splicing, via spliceosome;GO:0048024 regulation of mRNA splicing, via spliceosome;GO:0050684 regulation of mRNA processing		1	0	0	0	0	0	0	0	0	0	0	0	0
Eif4h	22384	symbol	M. musculus	22384	M. musculus	Eif4h	eukaryotic translation initiation factor 4H	GO:0006413 translational initiation;GO:0006412 translation;GO:0048589 developmental growth		1	0	0	0	1	0	0	0	0	0	0	0	0
Uba52	22186	symbol	M. musculus	22186	M. musculus	Uba52	ubiquitin A-52 residue ribosomal protein fusion product 1	GO:0140236 translation at presynapse;GO:0140241 translation at synapse;GO:0140242 translation at postsynapse		1	0	0	1	1	0	0	1	1	0	0	0	0
Rps27	57294	symbol	M. musculus	57294	M. musculus	Rps27	ribosomal protein S27	GO:0000028 ribosomal small subunit assembly;GO:0140236 translation at presynapse;GO:0140241 translation at synapse		1	0	0	0	1	0	0	0	0	0	0	0	0
Rps28	54127	symbol	M. musculus	54127	M. musculus	Rps28	ribosomal protein S28	GO:0000028 ribosomal small subunit assembly;GO:0140236 translation at presynapse;GO:0140241 translation at synapse		1	0	0	0	1	0	0	0	0	0	0	0	0
Ptges3	56351	symbol	M. musculus	56351	M. musculus	Ptges3	prostaglandin E synthase 3	GO:1905323 telomerase holoenzyme complex assembly;GO:0042921 nuclear receptor-mediated glucocorticoid signaling pathway;GO:0031958 nuclear receptor-mediated corticosteroid signaling pathway		1	0	1	0	1	1	0	0	0	0	0	0	1
Srsf9	108014	symbol	M. musculus	108014	M. musculus	Srsf9	serine and arginine-rich splicing factor 9	GO:0048025 negative regulation of mRNA splicing, via spliceosome;GO:0050686 negative regulation of mRNA processing;GO:0000380 alternative mRNA splicing, via spliceosome		1	1	0	0	0	0	0	0	0	0	0	0	0
Dhx36	72162	symbol	M. musculus	72162	M. musculus	Dhx36	DEAH-box helicase 36	GO:1903842 response to arsenite ion;GO:1903843 cellular response to arsenite ion;GO:1904582 positive regulation of intracellular mRNA localization		1	1	0	0	0	0	0	0	0	0	0	0	1
Hnrnpu	51810	symbol	M. musculus	51810	M. musculus	Hnrnpu	heterogeneous nuclear ribonucleoprotein U	GO:1990280 RNA localization to chromatin;GO:1902889 protein localization to spindle microtubule;GO:0098961 dendritic transport of ribonucleoprotein complex		1	1	0	0	0	0	0	0	1	0	1	0	1
Hnrnpa0	77134	symbol	M. musculus	77134	M. musculus	Hnrnpa0	heterogeneous nuclear ribonucleoprotein A0	GO:0070935 3'-UTR-mediated mRNA stabilization;GO:0048255 mRNA stabilization;GO:0043489 RNA stabilization		1	1	0	0	0	0	0	0	0	0	0	0	0
Cirbp	12696	symbol	M. musculus	12696	M. musculus	Cirbp	cold inducible RNA binding protein	GO:0070417 cellular response to cold;GO:0034063 stress granule assembly;GO:0048026 positive regulation of mRNA splicing, via spliceosome		1	1	0	0	0	0	0	0	0	0	0	0	0

## Sheet: Enrichment
GroupID	Category	Term	Description	LogP	Log(q-value)	Genes	Symbols	InTerm_InList
1_Summary	WikiPathways	WP310	mRNA processing	-10.5688	-6.31	12696,13207,14030,18521,20382,22384,23983,51810,54127,57294,77134,108014,229279,22668,72162,22186,56351	Cirbp,Ddx5,Ewsr1,Pcbp2,Srsf2,Eif4h,Pcbp1,Hnrnpu,Rps28,Rps27,Hnrnpa0,Srsf9,Hnrnpa3,Sf1,Dhx36,Uba52,Ptges3	17/-
1_Member	WikiPathways	WP310	mRNA processing	-10.5688	-6.31	12696,13207,14030,18521,20382,22384,23983,51810,54127,57294,77134,108014,229279	Cirbp,Ddx5,Ewsr1,Pcbp2,Srsf2,Eif4h,Pcbp1,Hnrnpu,Rps28,Rps27,Hnrnpa0,Srsf9,Hnrnpa3	13/455
1_Member	GO Biological Processes	GO:0050684	regulation of mRNA processing	-7.36973	-3.41198	12696,13207,20382,22668,51810,72162,108014	Cirbp,Ddx5,Srsf2,Sf1,Hnrnpu,Dhx36,Srsf9	7/144
1_Member	GO Biological Processes	GO:0048024	regulation of mRNA splicing, via spliceosome	-6.44516	-2.6635	12696,13207,20382,22668,51810,108014	Cirbp,Ddx5,Srsf2,Sf1,Hnrnpu,Srsf9	6/120
1_Member	GO Biological Processes	GO:1903311	regulation of mRNA metabolic process	-6.21549	-2.55876	12696,13207,20382,22668,51810,72162,77134,108014	Cirbp,Ddx5,Srsf2,Sf1,Hnrnpu,Dhx36,Hnrnpa0,Srsf9	8/313
1_Member	Reactome Gene Sets	R-MMU-72163	mRNA Splicing - Major Pathway	-5.34754	-1.84114	18521,20382,23983,51810,108014,229279	Pcbp2,Srsf2,Pcbp1,Hnrnpu,Srsf9,Hnrnpa3	6/185
1_Member	Reactome Gene Sets	R-MMU-72172	mRNA Splicing	-5.26785	-1.84114	18521,20382,23983,51810,108014,229279	Pcbp2,Srsf2,Pcbp1,Hnrnpu,Srsf9,Hnrnpa3	6/191
1_Member	GO Biological Processes	GO:0043484	regulation of RNA splicing	-5.25483	-1.84114	12696,13207,20382,22668,51810,108014	Cirbp,Ddx5,Srsf2,Sf1,Hnrnpu,Srsf9	6/192
1_Member	Reactome Gene Sets	R-MMU-8953854	Metabolism of RNA	-5.14485	-1.78916	18521,20382,22186,23983,51810,54127,57294,108014,229279	Pcbp2,Srsf2,Uba52,Pcbp1,Hnrnpu,Rps28,Rps27,Srsf9,Hnrnpa3	9/582
1_Member	GO Biological Processes	GO:0000375	RNA splicing, via transesterification reactions	-4.7445	-1.52711	13207,20382,22668,51810,108014,229279	Ddx5,Srsf2,Sf1,Hnrnpu,Srsf9,Hnrnpa3	6/236
1_Member	GO Biological Processes	GO:0000377	RNA splicing, via transesterification reactions with bulged adenosine as nucleophile	-4.7445	-1.52711	13207,20382,22668,51810,108014,229279	Ddx5,Srsf2,Sf1,Hnrnpu,Srsf9,Hnrnpa3	6/236
1_Member	GO Biological Processes	GO:0000398	mRNA splicing, via spliceosome	-4.7445	-1.52711	13207,20382,22668,51810,108014,229279	Ddx5,Srsf2,Sf1,Hnrnpu,Srsf9,Hnrnpa3	6/236
1_Member	GO Biological Processes	GO:0000380	alternative mRNA splicing, via spliceosome	-4.52057	-1.42528	13207,51810,108014	Ddx5,Hnrnpu,Srsf9	3/26
1_Member	Reactome Gene Sets	R-MMU-72203	Processing of Capped Intron-Containing Pre-mRNA	-4.51734	-1.42528	18521,20382,23983,51810,108014,229279	Pcbp2,Srsf2,Pcbp1,Hnrnpu,Srsf9,Hnrnpa3	6/259
1_Member	KEGG Pathway	mmu03040	Spliceosome - Mus musculus (house mouse)	-4.50797	-1.42528	13207,20382,23983,51810,108014,229279	Ddx5,Srsf2,Pcbp1,Hnrnpu,Srsf9,Hnrnpa3	6/260
1_Member	GO Biological Processes	GO:0006397	mRNA processing	-4.12112	-1.16337	13207,20382,22668,23983,51810,108014,229279	Ddx5,Srsf2,Sf1,Pcbp1,Hnrnpu,Srsf9,Hnrnpa3	7/446
1_Member	GO Biological Processes	GO:0008380	RNA splicing	-3.6655	-0.886922	13207,20382,22668,51810,108014,229279	Ddx5,Srsf2,Sf1,Hnrnpu,Srsf9,Hnrnpa3	6/370
1_Member	GO Biological Processes	GO:0000381	regulation of alternative mRNA splicing, via spliceosome	-3.46908	-0.744656	13207,20382,51810	Ddx5,Srsf2,Hnrnpu	3/58
1_Member	GO Biological Processes	GO:0016071	mRNA metabolic process	-3.3154	-0.669407	13207,20382,22668,23983,51810,108014,229279	Ddx5,Srsf2,Sf1,Pcbp1,Hnrnpu,Srsf9,Hnrnpa3	7/604
1_Member	GO Biological Processes	GO:0071383	cellular response to steroid hormone stimulus	-2.56442	-0.12518	13207,51810,56351	Ddx5,Hnrnpu,Ptges3	3/119
2_Summary	GO Biological Processes	GO:0043489	RNA stabilization	-4.66379	-1.48419	12696,51810,72162,77134,108014,15312,56424	Cirbp,Hnrnpu,Dhx36,Hnrnpa0,Srsf9,Hmgn1,Stub1	7/-
2_Member	GO Biological Processes	GO:0043489	RNA stabilization	-4.66379	-1.48419	12696,51810,72162,77134	Cirbp,Hnrnpu,Dhx36,Hnrnpa0	4/70
2_Member	GO Biological Processes	GO:1902369	negative regulation of RNA catabolic process	-4.33093	-1.32637	12696,51810,72162,77134	Cirbp,Hnrnpu,Dhx36,Hnrnpa0	4/85
2_Member	GO Biological Processes	GO:1903312	negative regulation of mRNA metabolic process	-4.1598	-1.17977	12696,51810,77134,108014	Cirbp,Hnrnpu,Hnrnpa0,Srsf9	4/94
2_Member	GO Biological Processes	GO:0048255	mRNA stabilization	-3.44713	-0.744656	12696,51810,77134	Cirbp,Hnrnpu,Hnrnpa0	3/59
2_Member	GO Biological Processes	GO:0043488	regulation of mRNA stability	-3.22312	-0.597807	12696,51810,72162,77134	Cirbp,Hnrnpu,Dhx36,Hnrnpa0	4/165
2_Member	GO Biological Processes	GO:1902373	negative regulation of mRNA catabolic process	-3.21065	-0.59532	12696,51810,77134	Cirbp,Hnrnpu,Hnrnpa0	3/71
2_Member	GO Biological Processes	GO:0043487	regulation of RNA stability	-3.07283	-0.486147	12696,51810,72162,77134	Cirbp,Hnrnpu,Dhx36,Hnrnpa0	4/181
2_Member	GO Biological Processes	GO:0061013	regulation of mRNA catabolic process	-3.00303	-0.443219	12696,51810,72162,77134	Cirbp,Hnrnpu,Dhx36,Hnrnpa0	4/189
2_Member	GO Biological Processes	GO:0045727	positive regulation of translation	-2.4101	-0.00865648	12696,51810,72162	Cirbp,Hnrnpu,Dhx36	3/135
2_Member	GO Biological Processes	GO:0009411	response to UV	-2.19749	0	12696,15312,72162	Cirbp,Hmgn1,Dhx36	3/161
2_Member	GO Biological Processes	GO:0009266	response to temperature stimulus	-2.16093	0	12696,56424,72162	Cirbp,Stub1,Dhx36	3/166
2_Member	GO Biological Processes	GO:0009895	negative regulation of catabolic process	-2.02445	0	12696,51810,72162,77134	Cirbp,Hnrnpu,Dhx36,Hnrnpa0	4/355
3_Summary	GO Biological Processes	GO:0006457	protein folding	-4.34671	-1.32637	14232,56351,56424,56812,93684,56334,235072,68944,107513	Fkbp8,Ptges3,Stub1,Dnajb2,Selenof,Tmed2,Septin7,Tmco1,Ssr1	9/-
3_Member	GO Biological Processes	GO:0006457	protein folding	-4.34671	-1.32637	14232,56351,56424,56812,93684	Fkbp8,Ptges3,Stub1,Dnajb2,Selenof	5/168
3_Member	GO Biological Processes	GO:0043393	regulation of protein binding	-2.96103	-0.41825	56334,56424,56812,235072	Tmed2,Stub1,Dnajb2,Septin7	4/194
3_Member	GO Biological Processes	GO:0034976	response to endoplasmic reticulum stress	-2.66951	-0.203117	56334,56424,56812,68944	Tmed2,Stub1,Dnajb2,Tmco1	4/233
3_Member	GO Biological Processes	GO:0051604	protein maturation	-2.36861	0	14232,56351,56424,56812,93684	Fkbp8,Ptges3,Stub1,Dnajb2,Selenof	5/459
3_Member	KEGG Pathway	mmu04141	Protein processing in endoplasmic reticulum - Mus musculus (house mouse)	-2.09811	0	56424,56812,107513	Stub1,Dnajb2,Ssr1	3/175
3_Member	GO Biological Processes	GO:0051098	regulation of binding	-2.0626	0	56334,56424,56812,235072	Tmed2,Stub1,Dnajb2,Septin7	4/346
4_Summary	Reactome Gene Sets	R-MMU-168638	NOD1/2 Signaling Pathway	-4.32988	-1.32637	22186,93765,227290,57436,75608,56424,22193,18521,56812,21399,76192	Uba52,Ube2n,Aamp,Gabarapl1,Chmp4b,Stub1,Ube2e3,Pcbp2,Dnajb2,Tcea1,Abhd12	11/-
4_Member	Reactome Gene Sets	R-MMU-168638	NOD1/2 Signaling Pathway	-4.32988	-1.32637	22186,93765,227290	Uba52,Ube2n,Aamp	3/30
4_Member	Reactome Gene Sets	R-MMU-168643	Nucleotide-binding domain, leucine rich repeat containing receptor (NLR) signaling pathways	-3.8264	-0.929349	22186,93765,227290	Uba52,Ube2n,Aamp	3/44
4_Member	Reactome Gene Sets	R-MMU-1632852	Macroautophagy	-3.65434	-0.886922	22186,57436,75608,93765	Uba52,Gabarapl1,Chmp4b,Ube2n	4/127
4_Member	Reactome Gene Sets	R-MMU-9612973	Autophagy	-3.65434	-0.886922	22186,57436,75608,93765	Uba52,Gabarapl1,Chmp4b,Ube2n	4/127
4_Member	Reactome Gene Sets	R-MMU-5218859	Regulated Necrosis	-3.60975	-0.856115	22186,56424,75608	Uba52,Stub1,Chmp4b	3/52
4_Member	GO Biological Processes	GO:0070534	protein K63-linked ubiquitination	-3.38356	-0.704561	22193,56424,93765	Ube2e3,Stub1,Ube2n	3/62
4_Member	KEGG Pathway	mmu04120	Ubiquitin mediated proteolysis - Mus musculus (house mouse)	-3.33593	-0.679208	22186,22193,56424,93765	Uba52,Ube2e3,Stub1,Ube2n	4/154
4_Member	Reactome Gene Sets	R-MMU-8852135	Protein ubiquitination	-3.17537	-0.569798	22186,22193,93765	Uba52,Ube2e3,Ube2n	3/73
4_Member	GO Biological Processes	GO:0019941	modification-dependent protein catabolic process	-3.00758	-0.443219	18521,22186,56424,56812,75608,93765	Pcbp2,Uba52,Stub1,Dnajb2,Chmp4b,Ube2n	6/493
4_Member	GO Biological Processes	GO:0043632	modification-dependent macromolecule catabolic process	-2.98948	-0.43827	18521,22186,56424,56812,75608,93765	Pcbp2,Uba52,Stub1,Dnajb2,Chmp4b,Ube2n	6/497
4_Member	Reactome Gene Sets	R-MMU-5696398	Nucleotide Excision Repair	-2.80483	-0.294232	21399,22186,93765	Tcea1,Uba52,Ube2n	3/98
4_Member	GO Biological Processes	GO:0030163	protein catabolic process	-2.7503	-0.262371	18521,22186,56424,56812,75608,76192,93765	Pcbp2,Uba52,Stub1,Dnajb2,Chmp4b,Abhd12,Ube2n	7/755
4_Member	GO Biological Processes	GO:0031398	positive regulation of protein ubiquitination	-2.59584	-0.149971	56424,56812,93765	Stub1,Dnajb2,Ube2n	3/116
4_Member	GO Biological Processes	GO:0051603	proteolysis involved in protein catabolic process	-2.52931	-0.0966076	18521,22186,56424,56812,75608,93765	Pcbp2,Uba52,Stub1,Dnajb2,Chmp4b,Ube2n	6/613
4_Member	Reactome Gene Sets	R-MMU-5357801	Programmed Cell Death	-2.42828	-0.0204348	22186,56424,75608	Uba52,Stub1,Chmp4b	3/133
4_Member	Reactome Gene Sets	R-MMU-983168	Antigen processing: Ubiquitination & Proteasome degradation	-2.36144	0	22186,22193,56424,93765	Uba52,Ube2e3,Stub1,Ube2n	4/284
4_Member	GO Biological Processes	GO:1903322	positive regulation of protein modification by small protein conjugation or removal	-2.34023	0	56424,56812,93765	Stub1,Dnajb2,Ube2n	3/143
4_Member	GO Biological Processes	GO:1901875	positive regulation of post-translational protein modification	-2.33179	0	56424,56812,93765	Stub1,Dnajb2,Ube2n	3/144
4_Member	GO Biological Processes	GO:0006511	ubiquitin-dependent protein catabolic process	-2.28316	0	18521,56424,56812,75608,93765	Pcbp2,Stub1,Dnajb2,Chmp4b,Ube2n	5/481
4_Member	GO Biological Processes	GO:0043161	proteasome-mediated ubiquitin-dependent protein catabolic process	-2.27758	0	18521,56424,56812,93765	Pcbp2,Stub1,Dnajb2,Ube2n	4/300
4_Member	Reactome Gene Sets	R-MMU-983169	Class I MHC mediated antigen processing & presentation	-2.09309	0	22186,22193,56424,93765	Uba52,Ube2e3,Stub1,Ube2n	4/339
5_Summary	Reactome Gene Sets	R-MMU-156827	L13a-mediated translational silencing of Ceruloplasmin expression	-3.87935	-0.947946	22186,22384,54127,57294,56351	Uba52,Eif4h,Rps28,Rps27,Ptges3	5/-
5_Member	Reactome Gene Sets	R-MMU-156827	L13a-mediated translational silencing of Ceruloplasmin expression	-3.87935	-0.947946	22186,22384,54127,57294	Uba52,Eif4h,Rps28,Rps27	4/111
5_Member	Reactome Gene Sets	R-MMU-72706	GTP hydrolysis and joining of the 60S ribosomal subunit	-3.8643	-0.947946	22186,22384,54127,57294	Uba52,Eif4h,Rps28,Rps27	4/112
5_Member	Reactome Gene Sets	R-MMU-72613	Eukaryotic Translation Initiation	-3.76281	-0.90197	22186,22384,54127,57294	Uba52,Eif4h,Rps28,Rps27	4/119
5_Member	Reactome Gene Sets	R-MMU-72737	Cap-dependent Translation Initiation	-3.76281	-0.90197	22186,22384,54127,57294	Uba52,Eif4h,Rps28,Rps27	4/119
5_Member	GO Biological Processes	GO:0140236	translation at presynapse	-3.74065	-0.901711	22186,54127,57294	Uba52,Rps28,Rps27	3/47
5_Member	GO Biological Processes	GO:0140241	translation at synapse	-3.71333	-0.901711	22186,54127,57294	Uba52,Rps28,Rps27	3/48
5_Member	GO Biological Processes	GO:0140242	translation at postsynapse	-3.71333	-0.901711	22186,54127,57294	Uba52,Rps28,Rps27	3/48
5_Member	Reactome Gene Sets	R-MMU-72649	Translation initiation complex formation	-3.44713	-0.744656	22384,54127,57294	Eif4h,Rps28,Rps27	3/59
5_Member	Reactome Gene Sets	R-MMU-72702	Ribosomal scanning and start codon recognition	-3.44713	-0.744656	22384,54127,57294	Eif4h,Rps28,Rps27	3/59
5_Member	Reactome Gene Sets	R-MMU-72662	Activation of the mRNA upon binding of the cap-binding complex and eIFs, and subsequent binding to 43S	-3.42557	-0.734992	22384,54127,57294	Eif4h,Rps28,Rps27	3/60
5_Member	Reactome Gene Sets	R-MMU-1799339	SRP-dependent cotranslational protein targeting to membrane	-2.88375	-0.349245	22186,54127,57294	Uba52,Rps28,Rps27	3/92
5_Member	Reactome Gene Sets	R-MMU-975956	Nonsense Mediated Decay (NMD) independent of the Exon Junction Complex (EJC)	-2.85685	-0.330461	22186,54127,57294	Uba52,Rps28,Rps27	3/94
5_Member	Reactome Gene Sets	R-MMU-72689	Formation of a pool of free 40S subunits	-2.76727	-0.27192	22186,54127,57294	Uba52,Rps28,Rps27	3/101
5_Member	Reactome Gene Sets	R-MMU-72766	Translation	-2.73171	-0.25826	22186,22384,54127,57294	Uba52,Eif4h,Rps28,Rps27	4/224
5_Member	Reactome Gene Sets	R-MMU-927802	Nonsense-Mediated Decay (NMD)	-2.62815	-0.175546	22186,54127,57294	Uba52,Rps28,Rps27	3/113
5_Member	Reactome Gene Sets	R-MMU-975957	Nonsense Mediated Decay (NMD) enhanced by the Exon Junction Complex (EJC)	-2.62815	-0.175546	22186,54127,57294	Uba52,Rps28,Rps27	3/113
5_Member	GO Biological Processes	GO:0022618	protein-RNA complex assembly	-2.13958	0	54127,56351,57294	Rps28,Ptges3,Rps27	3/169
5_Member	Reactome Gene Sets	R-MMU-6791226	Major pathway of rRNA processing in the nucleolus and cytosol	-2.09135	0	22186,54127,57294	Uba52,Rps28,Rps27	3/176
5_Member	Reactome Gene Sets	R-MMU-72312	rRNA processing	-2.09135	0	22186,54127,57294	Uba52,Rps28,Rps27	3/176
5_Member	Reactome Gene Sets	R-MMU-8868773	rRNA processing in the nucleus and cytosol	-2.09135	0	22186,54127,57294	Uba52,Rps28,Rps27	3/176
5_Member	GO Biological Processes	GO:0071826	protein-RNA complex organization	-2.07132	0	54127,56351,57294	Rps28,Ptges3,Rps27	3/179
6_Summary	GO Biological Processes	GO:0005977	glycogen metabolic process	-3.34295	-0.679208	56351,57436,66849,170718	Ptges3,Gabarapl1,Ppp1r2,Idh3b	4/-
6_Member	GO Biological Processes	GO:0005977	glycogen metabolic process	-3.34295	-0.679208	56351,57436,66849	Ptges3,Gabarapl1,Ppp1r2	3/64
6_Member	GO Biological Processes	GO:0044042	glucan metabolic process	-3.30365	-0.668117	56351,57436,66849	Ptges3,Gabarapl1,Ppp1r2	3/66
6_Member	GO Biological Processes	GO:0006112	energy reserve metabolic process	-3.09145	-0.495424	56351,57436,66849	Ptges3,Gabarapl1,Ppp1r2	3/78
6_Member	GO Biological Processes	GO:0005976	polysaccharide metabolic process	-3.04378	-0.466243	56351,57436,66849	Ptges3,Gabarapl1,Ppp1r2	3/81
6_Member	GO Biological Processes	GO:0015980	energy derivation by oxidation of organic compounds	-2.42796	-0.0204348	56351,57436,66849,170718	Ptges3,Gabarapl1,Ppp1r2,Idh3b	4/272
7_Summary	GO Biological Processes	GO:0019058	viral life cycle	-2.81762	-0.299198	18521,23983,75608	Pcbp2,Pcbp1,Chmp4b	3/-
7_Member	GO Biological Processes	GO:0019058	viral life cycle	-2.81762	-0.299198	18521,23983,75608	Pcbp2,Pcbp1,Chmp4b	3/97
7_Member	GO Biological Processes	GO:0016032	viral process	-2.5139	-0.0939657	18521,23983,75608	Pcbp2,Pcbp1,Chmp4b	3/124
8_Summary	KEGG Pathway	mmu04137	Mitophagy - animal - Mus musculus (house mouse)	-2.76727	-0.27192	14232,22186,57436	Fkbp8,Uba52,Gabarapl1	3/-
8_Member	KEGG Pathway	mmu04137	Mitophagy - animal - Mus musculus (house mouse)	-2.76727	-0.27192	14232,22186,57436	Fkbp8,Uba52,Gabarapl1	3/101
9_Summary	GO Biological Processes	GO:0090150	establishment of protein localization to membrane	-2.73879	-0.25826	22318,54411,68944,75608,56334,22186,59042,13207,14232,51810	Vamp2,Atp6ap1,Tmco1,Chmp4b,Tmed2,Uba52,Cope,Ddx5,Fkbp8,Hnrnpu	10/-
9_Member	GO Biological Processes	GO:0090150	establishment of protein localization to membrane	-2.73879	-0.25826	22318,54411,68944,75608	Vamp2,Atp6ap1,Tmco1,Chmp4b	4/223
9_Member	GO Biological Processes	GO:0072657	protein localization to membrane	-2.2203	0	22318,54411,56334,68944,75608	Vamp2,Atp6ap1,Tmed2,Tmco1,Chmp4b	5/498
9_Member	Reactome Gene Sets	R-MMU-199991	Membrane Trafficking	-2.08543	0	22186,22318,56334,59042,75608	Uba52,Vamp2,Tmed2,Cope,Chmp4b	5/537
9_Member	GO Biological Processes	GO:0033365	protein localization to organelle	-2.02713	0	13207,14232,51810,56334,68944,75608	Ddx5,Fkbp8,Hnrnpu,Tmed2,Tmco1,Chmp4b	6/780
10_Summary	GO Biological Processes	GO:0019218	regulation of steroid metabolic process	-2.5139	-0.0939657	11886,22668,56424	Asah1,Sf1,Stub1	3/-
10_Member	GO Biological Processes	GO:0019218	regulation of steroid metabolic process	-2.5139	-0.0939657	11886,22668,56424	Asah1,Sf1,Stub1	3/124
11_Summary	GO Biological Processes	GO:0031507	heterochromatin formation	-2.36592	0	12412,12417,51810,15312,93684,110052	Cbx1,Cbx3,Hnrnpu,Hmgn1,Selenof,Dek	6/-
11_Member	GO Biological Processes	GO:0031507	heterochromatin formation	-2.36592	0	12412,12417,51810	Cbx1,Cbx3,Hnrnpu	3/140
11_Member	GO Biological Processes	GO:0006325	chromatin organization	-2.1819	0	12412,12417,15312,51810,93684,110052	Cbx1,Cbx3,Hmgn1,Hnrnpu,Selenof,Dek	6/723
11_Member	GO Biological Processes	GO:0045814	negative regulation of gene expression, epigenetic	-2.06473	0	12412,12417,51810	Cbx1,Cbx3,Hnrnpu	3/180
12_Summary	GO Biological Processes	GO:0006997	nucleus organization	-2.34873	0	22668,75608,93684	Sf1,Chmp4b,Selenof	3/-
12_Member	GO Biological Processes	GO:0006997	nucleus organization	-2.34873	0	22668,75608,93684	Sf1,Chmp4b,Selenof	3/142
13_Summary	GO Biological Processes	GO:0051052	regulation of DNA metabolic process	-2.1916	0	51810,56351,72162,93765,110052,13207,56334,56424	Hnrnpu,Ptges3,Dhx36,Ube2n,Dek,Ddx5,Tmed2,Stub1	8/-
13_Member	GO Biological Processes	GO:0051052	regulation of DNA metabolic process	-2.1916	0	51810,56351,72162,93765,110052	Hnrnpu,Ptges3,Dhx36,Ube2n,Dek	5/506
13_Member	GO Biological Processes	GO:0080135	regulation of cellular response to stress	-2.10204	0	13207,56334,56424,93765,110052	Ddx5,Tmed2,Stub1,Ube2n,Dek	5/532
