# Supplementary material for: Myeloid Cell Replacement Therapy Improves Function in Friedreich Ataxia Mice by Intercellular Mitochondrial Transfer
Source: Research Square preprint supplement (doi:10.21203/rs.3.rs-5932916/v1), 2025-02-11
Supplement: Supplementary file 2 [file 18a33b1a5542b7a907418fd3.xlsx]

## Sheet: Sheet1
Cell Type	Gene	log2 fold change	Bonferroni-adjusted p-value	Expressed in cell type (%)	Expressed in other cells (%)
CPCs	Clu	1.86777	0	0.85	0.681
	Clic6	1.52373	7.00267e-131	0.455	0.287
	Ppp1r1b	2.12926	1.358e-84	0.325	0.207
	Krt18	1.84911	2.324e-84	0.354	0.228
	Cox8b	2.3029	2.30071e-71	0.305	0.201
	Hemk1	2.01775	4.1235e-66	0.324	0.223
Endothelial Cells	Flt1	5.82982	0	0.973	0.078
	Cxcl12	5.39774	0	0.919	0.097
	Egfl7	4.86432	0	0.883	0.079
	Spock2	5.13634	0	0.887	0.11
	Slco1a4	4.72289	0	0.926	0.204
	Ly6a	4.31793	0	0.871	0.181
	Itm2a	4.76315	0	0.808	0.144
	Ly6c1	4.19677	0	0.925	0.268
Microglia	P2ry12	5.14711	0	0.709	0.026
	Gpr34	4.04347	0	0.576	0.038
	Cx3cr1	4.02484	0	0.617	0.114
	Ly86	4.87803	0	0.52	0.036
	Fcrls	4.71772	0	0.353	0.013
	Siglech	4.46185	0	0.36	0.02
	Tmem119	3.79692	0	0.26	0.017
Oligodendrocytes	Mag	5.4723	0	0.889	0.041
	Tubb4a	5.51282	0	0.859	0.048
	Plp1	5.1015	0	0.985	0.256
	Ermn	5.1786	0	0.754	0.043
	Cldn11	5.31884	0	0.621	0.028
	Cnp	4.67418	0	0.655	0.106
	Aplp1	2.50789	3.985e-257	0.766	0.361
Neurons	Erbb4	1.94325	0	0.981	0.17
	Grm8	4.44089	0	0.829	0.036
	Cacnb4	3.2896	0	0.909	0.121
	Pcdh7	1.56559	0	0.816	0.115
	Syt1	4.02432	0	0.492	0.01
	Atp1b1	1.07967	2.56e-247	0.982	0.513
	Gm26917	0.695822	2.02e-115	0.478	0.158
Ependymal Cells	Tmem212	6.50471	0	0.909	0.029
	Ccdc153	5.88046	0	0.764	0.016
	Nnat	4.72503	0	0.787	0.082
	Rarres2	3.98462	0	0.577	0.076
	Iqcg	2.73294	1.99e-194	0.433	0.074
Macrophages	Lyz2	3.69417	4.3712e-144	0.602	0.159
	Ms4a7	2.69076	1.66e-30	0.211	0.061
	Ms4a6c	2.50158	2.997e-14	0.124	0.038
	Wfdc17	3.32678	2.2199e-13	0.071	0.015
Astrocytes	Slc1a2	7.53369	0	0.927	0.052
	Slc1a3	5.11908	0	0.856	0.1
	Plpp3	4.41967	0	0.815	0.104
	Slc6a11	7.88882	0	0.742	0.012
	Gpr37l1	3.94566	0	0.609	0.043
	Aldoc	3.31108	4.5134e-202	0.587	0.096
	Aqp4	3.81378	0	0.552	0.04
Olfactory Ensheathing Glia (OEG)	Npy	6.18657	0	0.799	0.034
	Frzb	7.76511	0	0.729	0.006
	Matn41	5.17861	0	0.636	0.048
	Fbln2	4.29947	0	0.554	0.041
	Fxyd6	6.2446	0	0.513	0.012
	Clca3a1	7.35415	0	0.383	0.007
	Hey2	4.63366	2.394e-255	0.565	0.056
	Bmp7	2.51808	6.7e-65	0.416	0.101
Pericyte	Pdgfrb	6.90194	0	0.754	0.017
	Des	6.08566	0	0.316	0.004
	Cspg4	5.67795	1.534e-274	0.404	0.015
	Rgs5	6.27309	8.156e-237	0.52	0.033
	Vtn	5.6201	1.4585e-146	0.673	0.098
	Nexn	4.36807	2.64e-97	0.263	0.019
Arachnoid Barrier Cells (ABC)	Slc47a1	8.40231	0	0.601	0.004
	Rspo32	5.87874	0	0.592	0.025
	Igfbp6	5.45739	4.732e-277	0.412	0.022
	Nbl1	4.37702	1.303e-194	0.429	0.036
	Mgp	4.23107	5.74e-92	0.63	0.17
	Fxyd5	2.48547	2.53e-36	0.479	0.171
	Rfk	2.46581	2.28e-30	0.416	0.155
Oligodendrocyte Progenitor Cells (OPC)	Ccn3	3.54069	2.93145e-35	0.235	0.032
	Dcn	3.61911	9.96623e-25	0.169	0.023
	Spp1	3.94172	1.33362e-24	0.221	0.038
	Igfbp5	3.83678	2.73364e-14	0.294	0.092
	Rspo3	3.41034	2.53518e-13	0.169	0.035
