# Supplementary material for: Myeloid Cell Replacement Therapy Improves Function in Friedreich Ataxia Mice by Intercellular Mitochondrial Transfer
Source: Research Square preprint supplement (doi:10.21203/rs.3.rs-5932916/v1), 2025-02-11
Supplement: Supplementary file 3 [file 5d001a1deae2e0307a061e9a.xlsx]

## Sheet: Sheet1
	endothelial	CPC	Astrocytes	Neuron	Macrophage	Ependymal.cells	Microglia	Oligo	Arachnoid.barrier.cells	OPC	Pericyte	OEG	UP-Down_2
GOBP_PROTON_TRANSMEMBRANE_TRANSPORT			3.40865	2.2321	2.25094		2.57402	1.77793	2.06629	2.19195		2.38354	8
GOBP_ATP_METABOLIC_PROCESS		-1.60638	3.32736	2.07168	3.14038		2.56916	1.7809	1.66081	1.76011		1.96711	7
GOBP_CELLULAR_RESPIRATION		-1.86339	3.28684	1.88423	3.28058		2.44696	1.72609	1.80647	2.06303		2.10454	7
GOBP_ENERGY_DERIVATION_BY_OXIDATION_OF_ORGANIC_COMPOUNDS		-1.84004	3.16751	1.66988	3.36721		2.32432	1.83828	1.73021	1.96802		2.22613	7
GOBP_OXIDATIVE_PHOSPHORYLATION		-1.89034	3.60636	2.36548	3.20577		2.70293	1.70593	1.93572	1.8944		2.07699	7
GOBP_ION_TRANSPORT	1.42246		1.83036		1.89309		1.87641			1.77958	1.44752	1.49895	7
GOBP_AEROBIC_RESPIRATION		-1.8614	3.30152	2.01773	3.18686		2.43679		1.83409	1.9185		2.02294	6
GOBP_RESPIRATORY_ELECTRON_TRANSPORT_CHAIN		-1.87915	3.55222	2.341	3.02779		2.70796	1.7239	1.85891			1.8955	6
GOBP_TRANSMEMBRANE_TRANSPORT	1.52657		1.64284		1.9243		1.57033			1.75988	1.42219		6
GOBP_ATP_SYNTHESIS_COUPLED_PROTON_TRANSPORT			2.44275		2.21462		2.38656	2.0454		2.17026		2.31767	6
GOBP_DH_DEHYDROGESE_COMPLEX_ASSEMBLY			2.83697		3.24482		2.49819	1.88573	2.04471			2.30953	6
GOBP_GENERATION_OF_PRECURSOR_METABOLITES_AND_ENERGY		-1.70837	3.06482		2.94861		2.15088		1.62396	1.71594		1.83271	5
GOBP_INORGANIC_ION_TRANSMEMBRANE_TRANSPORT	1.68388		1.86198		1.68032		1.84457					1.54977	5
GOBP_ION_TRANSMEMBRANE_TRANSPORT	1.78616		1.8339		1.86674		1.90452					1.49555	5
GOBP_MITOCHONDRIAL_RESPIRATORY_CHAIN_COMPLEX_ASSEMBLY			2.7314		3.29996		2.24446		1.874		-1.64884	2.30885	4
GOBP_CATION_TRANSMEMBRANE_TRANSPORT	1.6272		1.85243		1.60186		1.74138						4
GOBP_CATION_TRANSPORT			1.85863		1.63405		1.78775			1.64988			4
GOBP_MITOCHONDRION_ORGANIZATION			1.97166		1.94329				1.5473			1.66624	4
GOBP_ANION_TRANSPORT					1.9082	1.75964				2.17711	1.98305		4
GOBP_ATP_SYNTHESIS_COUPLED_ELECTRON_TRANSPORT		-1.9551	3.48289	2.54314	2.96418		2.63207						3
GOBP_ELECTRON_TRANSPORT_CHAIN		-1.87694	3.36068	2.1751	2.73036		2.64182						3
GOBP_MITOCHONDRIAL_ELECTRON_TRANSPORT_DH_TO_UBIQUINONE		-1.99416	3.1296	2.29045	3.17087		2.33277						3
GOBP_EMBRYONIC_PLACENTA_MORPHOGENESIS	2.00745							2.05626				2.18508	3
GOBP_FOLATE_IMPORT_ACROSS_PLASMA_MEMBRANE	1.3329		1.33043					1.31062					3
GOBP_IMPORT_ACROSS_PLASMA_MEMBRANE	2.15954					2.19241					1.68205		3
GOBP_IMPORT_INTO_CELL	2.04989		1.82202			2.20235							3
GOBP_NEGATIVE_REGULATION_OF_PEPTIDASE_ACTIVITY	1.96198		2.06659					1.82654					3
GOBP_ORGANIC_ACID_TRANSPORT	1.96834				2.29115						2.14318		3
GOBP_POSITIVE_REGULATION_OF_GLYCOGEN_STARCH_SYNTHASE_ACTIVITY	1.334		1.32839			1.32909							3
GOBP_MITOCHONDRIAL_ATP_SYNTHESIS_COUPLED_PROTON_TRANSPORT			2.35659		2.06658		2.03355						3
GOBP_AXON_DEVELOPMENT					2.16339	1.54568					1.57132		3
GOBP_HORMONE_METABOLIC_PROCESS					2.0745	2.07106	1.96515						3
GOBP_THYROID_HORMONE_TRANSPORT					1.61279			1.31168			1.84605		3
GOBP_CANONICAL_WNT_SIGLING_PATHWAY	1.65457				1.93508								2
GOBP_CIRCADIAN_SLEEP_WAKE_CYCLE	1.59258					1.75192							2
GOBP_ENZYME_LINKED_RECEPTOR_PROTEIN_SIGLING_PATHWAY	1.44494										1.57263		2
GOBP_POSITIVE_REGULATION_OF_PEPTIDYL_TYROSINE_PHOSPHORYLATION	1.97674										1.80358		2
GOBP_POSITIVE_REGULATION_OF_SKELETAL_MUSCLE_TISSUE_GROWTH	1.334							1.31239					2
GOBP_POSITIVE_REGULATION_OF_SODIUM_ION_TRANSMEMBRANE_TRANSPORT	2.15189							2.04262					2
GOBP_POSITIVE_REGULATION_OF_SODIUM_ION_TRANSPORT	2.0538							2.04262					2
GOBP_POTASSIUM_ION_TRANSPORT	2.56987					1.91155							2
GOBP_REGULATION_OF_SKELETAL_MUSCLE_TISSUE_GROWTH	1.334							1.31239					2
GOBP_REGULATION_OF_SODIUM_ION_TRANSMEMBRANE_TRANSPORT	2.15001							2.18192					2
GOBP_REVERSE_CHOLESTEROL_TRANSPORT	1.88278							1.94708					2
GOBP_SKELETAL_MUSCLE_TISSUE_GROWTH	1.334							1.31239					2
GOBP_SODIUM_ION_EXPORT_ACROSS_PLASMA_MEMBRANE	1.64318				1.77833								2
GOBP_SODIUM_ION_TRANSMEMBRANE_TRANSPORT	2.34313					2.31542							2
GOBP_SODIUM_ION_TRANSPORT	2.00763					2.0223							2
GOBP_ATP_BIOSYNTHETIC_PROCESS			2.39135				2.36006						2
GOBP_CELL_CHEMOTAXIS			1.77884								1.82788		2
GOBP_CELL_RECOGNITION			2.00641								1.75787		2
GOBP_LEUKOCYTE_CHEMOTAXIS			2.23451								1.73162		2
GOBP_LEUKOCYTE_MIGRATION			2.38051								1.85635		2
GOBP_MITOCHONDRIAL_ELECTRON_TRANSPORT_CYTOCHROME_C_TO_OXYGEN			2.20408				2.08007						2
GOBP_MITOCHONDRIAL_TRANSPORT			2.02107				1.81132						2
GOBP_MONONUCLEAR_CELL_MIGRATION			2.18747								1.71885		2
GOBP_MYELOID_LEUKOCYTE_MIGRATION			1.9848								1.74918		2
GOBP_NUCLEOSIDE_TRIPHOSPHATE_BIOSYNTHETIC_PROCESS			2.45232				2.38359						2
GOBP_NUCLEOSIDE_TRIPHOSPHATE_METABOLIC_PROCESS			2.30274				2.26247						2
GOBP_PURINE_CONTAINING_COMPOUND_BIOSYNTHETIC_PROCESS			1.74405				1.8092						2
GOBP_RESPONSE_TO_FOLIC_ACID			1.33043					1.31062					2
GOBP_RIBONUCLEOSIDE_TRIPHOSPHATE_BIOSYNTHETIC_PROCESS			2.41031				2.38359						2
GOBP_RIBONUCLEOSIDE_TRIPHOSPHATE_METABOLIC_PROCESS			2.30542				2.26247						2
GOBP_T_CELL_MIGRATION			1.99774								1.72129		2
GOBP_CARBOXYLIC_ACID_TRANSPORT					2.04698						1.95458		2
GOBP_ORGANIC_ANION_TRANSPORT					1.96864						2.01227		2
GOBP_PRIMARY_ALCOHOL_METABOLIC_PROCESS					2.14063			2.10767					2
GOBP_RETINOL_METABOLIC_PROCESS					1.62623			1.90231					2
GOBP_TERPENOID_METABOLIC_PROCESS					1.94988			2.11521					2
GOBP_CELL_CELL_ADHESION_VIA_PLASMA_MEMBRANE_ADHESION_MOLECULES						2.00099					1.82549		2
GOBP_CHLORIDE_TRANSPORT						2.17112					1.91029		2
GOBP_ELASTIN_CATABOLIC_PROCESS						1.61504		1.64908					2
GOBP_ELASTIN_METABOLIC_PROCESS						1.61504		1.64908					2
GOBP_HOMOPHILIC_CELL_ADHESION_VIA_PLASMA_MEMBRANE_ADHESION_MOLECULES						1.89587					1.96134		2
GOBP_INORGANIC_ANION_TRANSPORT						2.02986					1.85157		2
GOBP_NEURON_PROJECTION_GUIDANCE						2.26291					1.76718		2
GOBP_REGULATION_OF_SODIUM_ION_TRANSPORT						1.96953		2.07144					2
GOBP_TAXIS						1.7381					1.92042		2
GOBP_TIGHT_JUNCTION_ORGANIZATION							2.10646				2.44096		2
GOBP_RIBOSOMAL_SMALL_SUBUNIT_BIOGENESIS	-2.29356		2.52426				2.23275						1
GOBP_BRAIN_MORPHOGENESIS	2.0945												1
GOBP_CELLULAR_ANION_HOMEOSTASIS	1.76548												1
GOBP_CELLULAR_MONOVALENT_INORGANIC_ANION_HOMEOSTASIS	1.6368												1
GOBP_CELLULAR_POTASSIUM_ION_HOMEOSTASIS	1.63771												1
GOBP_CELLULAR_SODIUM_ION_HOMEOSTASIS	1.87118												1
GOBP_CIRCADIAN_SLEEP_WAKE_CYCLE_SLEEP	1.59258												1
GOBP_ENERGY_RESERVE_METABOLIC_PROCESS	2.12351												1
GOBP_ESTABLISHMENT_OF_CENTROSOME_LOCALIZATION	2.06985												1
GOBP_EXOCRINE_PANCREAS_DEVELOPMENT	1.73867												1
GOBP_FUSION_OF_SPERM_TO_EGG_PLASMA_MEMBRANE_INVOLVED_IN_SINGLE_FERTILIZATION	1.3329												1
GOBP_LOCOMOTORY_EXPLORATION_BEHAVIOR	1.79041												1
GOBP_METAL_ION_TRANSPORT	1.59425												1
GOBP_MONOVALENT_INORGANIC_ANION_HOMEOSTASIS	1.74833												1
GOBP_NEGATIVE_REGULATION_OF_SODIUM_ION_TRANSMEMBRANE_TRANSPORT	2.04145												1
GOBP_NEGATIVE_REGULATION_OF_SODIUM_ION_TRANSPORT	2.06391												1
GOBP_POSITIVE_REGULATION_OF_SYPTIC_TRANSMISSION_GABAERGIC	1.5862												1
GOBP_POTASSIUM_ION_HOMEOSTASIS	1.74833												1
GOBP_POTASSIUM_ION_IMPORT_ACROSS_PLASMA_MEMBRANE	2.12386												1
GOBP_REGULATION_OF_MEMBRANE_PROTEIN_ECTODOMAIN_PROTEOLYSIS	1.99881												1
GOBP_RESPONSE_TO_DIETARY_EXCESS	1.80408												1
GOBP_SLEEP	1.76476												1
GOBP_VOLUNTARY_MUSCULOSKELETAL_MOVEMENT	1.84308												1
GOBP_ENDOTHELIAL_CELL_CHEMOTAXIS		1.93496											1
GOBP_POSITIVE_REGULATION_OF_ENDOTHELIAL_CELL_CHEMOTAXIS		1.93496											1
GOBP_REGULATION_OF_ENDOTHELIAL_CELL_CHEMOTAXIS		1.93496											1
GOBP_SIGL_PEPTIDE_PROCESSING		2.41187											1
GOBP_ANTIBACTERIAL_HUMORAL_RESPONSE			1.72113										1
GOBP_ANTIMICROBIAL_HUMORAL_RESPONSE			1.98209										1
GOBP_AUTOPHAGOSOME_MEMBRANE_DOCKING			1.75698										1
GOBP_CARDIAC_NEURAL_CREST_CELL_MIGRATION_INVOLVED_IN_OUTFLOW_TRACT_MORPHOGENESIS			1.33043										1
GOBP_CATECHOLAMINE_UPTAKE			1.69166										1
GOBP_CELLULAR_IRON_ION_HOMEOSTASIS			1.98187										1
GOBP_CELLULAR_TRANSITION_METAL_ION_HOMEOSTASIS			1.86794										1
GOBP_CHEMOKINE_PRODUCTION			2.13297										1
GOBP_ENTRY_INTO_HOST			1.8501										1
GOBP_FOLIC_ACID_METABOLIC_PROCESS			1.33043										1
GOBP_HYDROGEN_PEROXIDE_METABOLIC_PROCESS			1.98497										1
GOBP_INFLAMMATORY_CELL_APOPTOTIC_PROCESS			1.88375										1
GOBP_IRON_ION_HOMEOSTASIS			1.9582										1
GOBP_KILLING_OF_CELLS_OF_ANOTHER_ORGANISM			1.80389										1
GOBP_LEUKOCYTE_APOPTOTIC_PROCESS			2.03487										1
GOBP_LYMPHOCYTE_CHEMOTAXIS			1.6835										1
GOBP_LYMPHOCYTE_MIGRATION			2.26729										1
GOBP_MACROPHAGE_APOPTOTIC_PROCESS			1.7599										1
GOBP_MATURATION_OF_LSU_RR			1.85352										1
GOBP_MITOCHONDRIAL_ELECTRON_TRANSPORT_UBIQUINOL_TO_CYTOCHROME_C			2.14978										1
GOBP_MYELOID_CELL_APOPTOTIC_PROCESS			1.97386										1
GOBP_NEGATIVE_REGULATION_OF_MYELOID_CELL_APOPTOTIC_PROCESS			1.87126										1
GOBP_NEGATIVE_REGULATION_OF_OXIDATIVE_STRESS_INDUCED_INTRINSIC_APOPTOTIC_SIGLING_PATHWAY			1.90577										1
GOBP_NEGATIVE_REGULATION_OF_PROTEOLYSIS			2.28112										1
GOBP_NEGATIVE_REGULATION_OF_PROTEOLYSIS_INVOLVED_IN_CELLULAR_PROTEIN_CATABOLIC_PROCESS			1.89498										1
GOBP_NEUTROPHIL_CHEMOTAXIS			1.93454										1
GOBP_NEUTROPHIL_MIGRATION			1.93454										1
GOBP_NUCLEOSIDE_PHOSPHATE_BIOSYNTHETIC_PROCESS			1.73075										1
GOBP_POSITIVE_REGULATION_BY_HOST_OF_VIRAL_GENOME_REPLICATION			1.64474										1
GOBP_POSITIVE_REGULATION_OF_ACTIVATED_T_CELL_PROLIFERATION			1.86442										1
GOBP_POSITIVE_REGULATION_OF_CHEMOKINE_PRODUCTION			1.91814										1
GOBP_POSITIVE_REGULATION_OF_INTRINSIC_APOPTOTIC_SIGLING_PATHWAY_BY_P53_CLASS_MEDIATOR			1.75362										1
GOBP_POSITIVE_REGULATION_OF_LEUKOCYTE_PROLIFERATION			1.80292										1
GOBP_POSITIVE_REGULATION_OF_OXIDOREDUCTASE_ACTIVITY			1.94369										1
GOBP_POSITIVE_REGULATION_OF_T_CELL_MIGRATION			1.81213										1
GOBP_PROTEIN_CONTAINING_COMPLEX_ORGANIZATION			1.36387										1
GOBP_REGULATION_OF_ACUTE_INFLAMMATORY_RESPONSE_TO_ANTIGENIC_STIMULUS			1.57052										1
GOBP_REGULATION_OF_AEROBIC_RESPIRATION			2.13393										1
GOBP_REGULATION_OF_ATP_METABOLIC_PROCESS			2.28302										1
GOBP_REGULATION_OF_CELLULAR_RESPIRATION			1.9468										1
GOBP_REGULATION_OF_GENERATION_OF_PRECURSOR_METABOLITES_AND_ENERGY			2.53308										1
GOBP_REGULATION_OF_HIGH_VOLTAGE_GATED_CALCIUM_CHANNEL_ACTIVITY			1.75382										1
GOBP_REGULATION_OF_INTRINSIC_APOPTOTIC_SIGLING_PATHWAY			1.70748										1
GOBP_REGULATION_OF_LEUKOCYTE_MIGRATION			2.02321										1
GOBP_REGULATION_OF_LYMPHOCYTE_MIGRATION			1.90142										1
GOBP_REGULATION_OF_MITOCHONDRIAL_ATP_SYNTHESIS_COUPLED_ELECTRON_TRANSPORT			1.59925										1
GOBP_REGULATION_OF_MITOCHONDRIAL_ELECTRON_TRANSPORT_DH_TO_UBIQUINONE			1.57052										1
GOBP_REGULATION_OF_OXIDATIVE_STRESS_INDUCED_INTRINSIC_APOPTOTIC_SIGLING_PATHWAY			1.92853										1
GOBP_REGULATION_OF_PEPTIDASE_ACTIVITY			1.64897										1
GOBP_REGULATION_OF_PROTEOLYSIS			1.54018										1
GOBP_REGULATION_OF_T_CELL_MIGRATION			1.87947										1
GOBP_REGULATION_OF_VOLTAGE_GATED_CALCIUM_CHANNEL_ACTIVITY			1.75382										1
GOBP_RESPIRATORY_BURST			2.05479										1
GOBP_RESPONSE_TO_MERCURY_ION			1.57052										1
GOBP_SMALL_MOLECULE_METABOLIC_PROCESS			1.38017										1
GOBP_SPERM_EGG_RECOGNITION			2.08993										1
GOBP_TRANSITION_METAL_ION_HOMEOSTASIS			1.85077										1
GOBP_CELLULAR_ALDEHYDE_METABOLIC_PROCESS				2.37911									1
GOBP_ORGANIC_HYDROXY_COMPOUND_BIOSYNTHETIC_PROCESS				2.02414									1
GOBP_REGULATION_OF_D_BINDING				2.31196									1
GOBP_REGULATION_OF_UBIQUITIN_SPECIFIC_PROTEASE_ACTIVITY				2.04216									1
GOBP_ACTIVATION_OF_PROTEIN_KISE_B_ACTIVITY					1.86638								1
GOBP_ALCOHOL_CATABOLIC_PROCESS					1.88508								1
GOBP_ALCOHOL_METABOLIC_PROCESS					1.86306								1
GOBP_EXPORT_ACROSS_PLASMA_MEMBRANE					1.98367								1
GOBP_LACTATE_TRANSMEMBRANE_TRANSPORT					1.34607								1
GOBP_METAL_ION_EXPORT					1.98367								1
GOBP_ORGANIC_HYDROXY_COMPOUND_CATABOLIC_PROCESS					1.88508								1
GOBP_ORGANIC_HYDROXY_COMPOUND_METABOLIC_PROCESS					1.92028								1
GOBP_REGULATION_OF_CANONICAL_WNT_SIGLING_PATHWAY					1.93508								1
GOBP_REGULATION_OF_HORMONE_LEVELS					1.87907								1
GOBP_ANION_TRANSMEMBRANE_TRANSPORT						1.89844							1
GOBP_CELLULAR_MONOVALENT_INORGANIC_CATION_HOMEOSTASIS						1.79512							1
GOBP_CENTRAL_NERVOUS_SYSTEM_MYELIN_FORMATION						1.62025							1
GOBP_COLLAGEN_CATABOLIC_PROCESS						1.89986							1
GOBP_DENDRITE_SELF_AVOIDANCE						1.9485							1
GOBP_DICARBOXYLIC_ACID_TRANSPORT						1.87198							1
GOBP_HYALURON_BIOSYNTHETIC_PROCESS						1.61705							1
GOBP_MUSCLE_TISSUE_DEVELOPMENT						1.44723							1
GOBP_NEURON_RECOGNITION						2.00247							1
GOBP_ODONTOGENESIS						1.90585							1
GOBP_ODONTOGENESIS_OF_DENTIN_CONTAINING_TOOTH						1.92182							1
GOBP_POSITIVE_REGULATION_OF_FIBROBLAST_MIGRATION						1.62426							1
GOBP_POSITIVE_REGULATION_OF_MUSCLE_TISSUE_DEVELOPMENT						1.94446							1
GOBP_PROTEIN_LOCALIZATION_TO_SYPSE						1.83863							1
GOBP_RECEPTOR_LOCALIZATION_TO_SYPSE						2.13511							1
GOBP_REGULATION_OF_BEHAVIOR						2.2049							1
GOBP_REGULATION_OF_CIRCADIAN_SLEEP_WAKE_CYCLE						1.65674							1
GOBP_REGULATION_OF_HYALURON_BIOSYNTHETIC_PROCESS						1.61705							1
GOBP_RELAXATION_OF_CARDIAC_MUSCLE						2.02137							1
GOBP_RESPONSE_TO_MECHANICAL_STIMULUS						1.70074							1
GOBP_PURINE_CONTAINING_COMPOUND_METABOLIC_PROCESS							1.83253						1
GOBP_RESPONSE_TO_ANGIOTENSIN							1.8804						1
GOBP_RIBOSE_PHOSPHATE_BIOSYNTHETIC_PROCESS							1.77111						1
GOBP_RIBOSE_PHOSPHATE_METABOLIC_PROCESS							1.79803						1
GOBP_EMBRYONIC_PLACENTA_DEVELOPMENT								2.02385					1
GOBP_FAT_SOLUBLE_VITAMIN_METABOLIC_PROCESS								2.02625					1
GOBP_NUCLEOSIDE_MONOPHOSPHATE_CATABOLIC_PROCESS								1.81203					1
GOBP_PHARYNGEAL_ARCH_ARTERY_MORPHOGENESIS								1.31062					1
GOBP_PLASMINOGEN_ACTIVATION								1.82925					1
GOBP_PROTEIN_TETRAMERIZATION								1.97991					1
GOBP_PYRAMIDAL_NEURON_DEVELOPMENT								1.84909					1
GOBP_PYRAMIDAL_NEURON_DIFFERENTIATION								1.84909					1
GOBP_REGULATION_OF_INSULIN_LIKE_GROWTH_FACTOR_RECEPTOR_SIGLING_PATHWAY								1.31309					1
GOBP_REGULATION_OF_RESPONSE_TO_FOOD								1.65942					1
GOBP_RIBONUCLEOSIDE_MONOPHOSPHATE_CATABOLIC_PROCESS								1.81203					1
GOBP_VITAMIN_METABOLIC_PROCESS								1.99994					1
GOBP_ZYMOGEN_ACTIVATION								2.02588					1
GOBP_CGMP_MEDIATED_SIGLING									1.98764				1
GOBP_CGMP_METABOLIC_PROCESS									1.35053				1
GOBP_FOLATE_TRANSMEMBRANE_TRANSPORT									1.64255				1
GOBP_PURINE_CONTAINING_COMPOUND_CATABOLIC_PROCESS									2.2839				1
GOBP_PURINE_NUCLEOTIDE_CATABOLIC_PROCESS									2.2839				1
GOBP_RIBONUCLEOTIDE_CATABOLIC_PROCESS									2.2839				1
GOBP_VITAMIN_TRANSMEMBRANE_TRANSPORT									1.64255				1
GOBP_MITOCHONDRIAL_TRANSMEMBRANE_TRANSPORT										2.12827			1
GOBP_PROTEIN_EXIT_FROM_ENDOPLASMIC_RETICULUM										1.5973			1
GOBP_ACTIN_FILAMENT_BASED_PROCESS											1.48637		1
GOBP_AMEBOIDAL_TYPE_CELL_MIGRATION											1.89049		1
GOBP_AMINOPHOSPHOLIPID_TRANSLOCATION											1.67888		1
GOBP_ATOMICAL_STRUCTURE_FORMATION_INVOLVED_IN_MORPHOGENESIS											1.79693		1
GOBP_ATOMICAL_STRUCTURE_HOMEOSTASIS											2.04218		1
GOBP_ANIMAL_ORGAN_MORPHOGENESIS											1.37294		1
GOBP_APICAL_JUNCTION_ASSEMBLY											2.34371		1
GOBP_ARTERY_DEVELOPMENT											1.70025		1
GOBP_ARTERY_MORPHOGENESIS											1.73912		1
GOBP_AXON_EXTENSION											1.8504		1
GOBP_BILE_ACID_AND_BILE_SALT_TRANSPORT											1.92926		1
GOBP_BIOLOGICAL_ADHESION											1.78438		1
GOBP_BLOOD_VESSEL_ENDOTHELIAL_CELL_MIGRATION											1.91186		1
GOBP_BLOOD_VESSEL_MATURATION											1.80026		1
GOBP_BLOOD_VESSEL_MORPHOGENESIS											2.21326		1
GOBP_BRANCHING_INVOLVED_IN_BLOOD_VESSEL_MORPHOGENESIS											1.80075		1
GOBP_CARBOHYDRATE_IMPORT_ACROSS_PLASMA_MEMBRANE											1.31962		1
GOBP_CARDIOCYTE_DIFFERENTIATION											1.58991		1
GOBP_CELLULAR_COMPONENT_MORPHOGENESIS											1.46453		1
GOBP_CELLULAR_RESPONSE_TO_CALCIUM_ION											1.757		1
GOBP_CELLULAR_RESPONSE_TO_ENDOGENOUS_STIMULUS											1.33643		1
GOBP_CELLULAR_RESPONSE_TO_FLUID_SHEAR_STRESS											1.94418		1
GOBP_CELLULAR_RESPONSE_TO_HYDROGEN_PEROXIDE											1.64774		1
GOBP_CELLULAR_RESPONSE_TO_HYPEROXIA											1.71209		1
GOBP_CELLULAR_RESPONSE_TO_INTERLEUKIN_1											1.76359		1
GOBP_CELLULAR_RESPONSE_TO_NITROGEN_COMPOUND											1.43344		1
GOBP_CELL_ACTIVATION											1.54508		1
GOBP_CELL_CELL_ADHESION											1.49936		1
GOBP_CELL_CELL_JUNCTION_ASSEMBLY											2.2943		1
GOBP_CELL_CELL_JUNCTION_ORGANIZATION											2.1638		1
GOBP_CELL_CELL_SIGLING											1.36885		1
GOBP_CELL_DIFFERENTIATION_INVOLVED_IN_KIDNEY_DEVELOPMENT											1.88812		1
GOBP_CELL_FATE_COMMITMENT											1.66177		1
GOBP_CELL_GROWTH											1.6635		1
GOBP_CELL_JUNCTION_ASSEMBLY											2.20928		1
GOBP_CELL_JUNCTION_ORGANIZATION											1.9478		1
GOBP_CELL_MIGRATION											1.99971		1
GOBP_CELL_MORPHOGENESIS											1.85062		1
GOBP_CELL_MORPHOGENESIS_INVOLVED_IN_DIFFERENTIATION											1.71255		1
GOBP_CELL_MORPHOGENESIS_INVOLVED_IN_NEURON_DIFFERENTIATION											1.54548		1
GOBP_CELL_PART_MORPHOGENESIS											1.51576		1
GOBP_CELL_PROJECTION_ORGANIZATION											1.443		1
GOBP_CERAMIDE_BIOSYNTHETIC_PROCESS											1.83819		1
GOBP_CERAMIDE_METABOLIC_PROCESS											1.96595		1
GOBP_CIRCULATORY_SYSTEM_DEVELOPMENT											1.94847		1
GOBP_CIRCULATORY_SYSTEM_PROCESS											2.0504		1
GOBP_CYTOKINE_PRODUCTION											1.73616		1
GOBP_CYTOKINE_PRODUCTION_INVOLVED_IN_IMMUNE_RESPONSE											1.84059		1
GOBP_DEHYDROASCORBIC_ACID_TRANSPORT											1.31962		1
GOBP_DETECTION_OF_BIOTIC_STIMULUS											1.98073		1
GOBP_DEVELOPMENTAL_CELL_GROWTH											1.76591		1
GOBP_DEVELOPMENTAL_GROWTH											1.50834		1
GOBP_EMBRYONIC_HEART_TUBE_DEVELOPMENT											1.91975		1
GOBP_ENDOCARDIAL_CELL_DIFFERENTIATION											1.79246		1
GOBP_ENDOCARDIUM_DEVELOPMENT											1.79514		1
GOBP_ENDOCARDIUM_MORPHOGENESIS											1.719		1
GOBP_ENDODERMAL_CELL_FATE_SPECIFICATION											1.32291		1
GOBP_ENDOTHELIAL_CELL_DEVELOPMENT											2.11664		1
GOBP_ENDOTHELIAL_CELL_MIGRATION											1.79148		1
GOBP_ENDOTHELIAL_CELL_PROLIFERATION											1.88509		1
GOBP_ENDOTHELIUM_DEVELOPMENT											2.23284		1
GOBP_EPITHELIAL_CELL_DEVELOPMENT											1.94421		1
GOBP_EPITHELIAL_CELL_DIFFERENTIATION											1.97832		1
GOBP_EPITHELIAL_CELL_DIFFERENTIATION_INVOLVED_IN_KIDNEY_DEVELOPMENT											1.96951		1
GOBP_EPITHELIAL_FLUID_TRANSPORT											1.65547		1
GOBP_EPITHELIAL_TUBE_MORPHOGENESIS											1.73634		1
GOBP_EPITHELIUM_DEVELOPMENT											1.79511		1
GOBP_ESTABLISHMENT_OF_ENDOTHELIAL_BARRIER											2.14263		1
GOBP_FATTY_ACID_TRANSPORT											1.90471		1
GOBP_FILOPODIUM_ASSEMBLY											1.78038		1
GOBP_GANGLIOSIDE_BIOSYNTHETIC_PROCESS											1.66683		1
GOBP_GLOMERULAR_EPITHELIUM_DEVELOPMENT											1.92644		1
GOBP_GLOMERULUS_DEVELOPMENT											1.86595		1
GOBP_GLUCOSE_IMPORT_ACROSS_PLASMA_MEMBRANE											1.31962		1
GOBP_GLYCEROPHOSPHOLIPID_METABOLIC_PROCESS											1.67292		1
GOBP_GROWTH											1.52013		1
GOBP_G_PROTEIN_COUPLED_RECEPTOR_SIGLING_PATHWAY											1.62004		1
GOBP_HEART_DEVELOPMENT											1.60881		1
GOBP_HEART_MORPHOGENESIS											1.89665		1
GOBP_HEMATOPOIETIC_STEM_CELL_PROLIFERATION											1.76523		1
GOBP_HEMOSTASIS											1.54652		1
GOBP_HOMEOSTATIC_PROCESS											1.39456		1
GOBP_ICOSANOID_TRANSPORT											2.01982		1
GOBP_IMMUNE_EFFECTOR_PROCESS											1.68836		1
GOBP_IMMUNE_RESPONSE											1.53769		1
GOBP_IMMUNE_SYSTEM_DEVELOPMENT											1.53899		1
GOBP_INOSITOL_LIPID_MEDIATED_SIGLING											1.79273		1
GOBP_INTESTIL_ABSORPTION											1.74019		1
GOBP_KIDNEY_EPITHELIUM_DEVELOPMENT											1.64886		1
GOBP_LEUKOTRIENE_TRANSPORT											1.32381		1
GOBP_LIPID_BIOSYNTHETIC_PROCESS											1.57024		1
GOBP_LIPID_LOCALIZATION											1.97596		1
GOBP_LIPID_TRANSLOCATION											2.07857		1
GOBP_LOCOMOTION											1.92516		1
GOBP_MAINTENCE_OF_BLOOD_BRAIN_BARRIER											2.1117		1
GOBP_MAPK_CASCADE											1.61528		1
GOBP_MATERL_PROCESS_INVOLVED_IN_PARTURITION											1.32441		1
GOBP_MEMBRANE_LIPID_BIOSYNTHETIC_PROCESS											1.96731		1
GOBP_MEMBRANE_LIPID_METABOLIC_PROCESS											1.88475		1
GOBP_MESENCHYMAL_CELL_DEVELOPMENT											1.75486		1
GOBP_MESENCHYMAL_CELL_DIFFERENTIATION											1.65948		1
GOBP_MESENCHYME_DEVELOPMENT											1.56195		1
GOBP_MONOCARBOXYLIC_ACID_TRANSPORT											2.13605		1
GOBP_MONOCYTE_EXTRAVASATION											1.81721		1
GOBP_MORPHOGENESIS_OF_AN_EPITHELIUM											1.55278		1
GOBP_MULTICELLULAR_ORGANISMAL_HOMEOSTASIS											1.9444		1
GOBP_MYELOID_LEUKOCYTE_ACTIVATION											1.77735		1
GOBP_IL_DEVELOPMENT											1.57036		1
GOBP_NEGATIVE_REGULATION_OF_DENDRITE_MORPHOGENESIS											1.65351		1
GOBP_NEGATIVE_REGULATION_OF_DEVELOPMENTAL_PROCESS											1.50192		1
GOBP_NEGATIVE_REGULATION_OF_EPITHELIAL_CELL_DIFFERENTIATION											1.78744		1
GOBP_NEGATIVE_REGULATION_OF_LOCOMOTION											1.7588		1
GOBP_NEGATIVE_REGULATION_OF_MULTICELLULAR_ORGANISMAL_PROCESS											1.63901		1
GOBP_NEGATIVE_REGULATION_OF_RESPONSE_TO_EXTERL_STIMULUS											1.92736		1
GOBP_NEGATIVE_REGULATION_OF_RESPONSE_TO_STIMULUS											1.57362		1
GOBP_NEGATIVE_REGULATION_OF_SIGLING											1.4111		1
GOBP_NEGATIVE_REGULATION_OF_SMOOTH_MUSCLE_CELL_APOPTOTIC_PROCESS											1.61411		1
GOBP_NEGATIVE_REGULATION_OF_WNT_SIGLING_PATHWAY_INVOLVED_IN_HEART_DEVELOPMENT											1.32291		1
GOBP_NEPHRON_DEVELOPMENT											1.73945		1
GOBP_NEPHRON_EPITHELIUM_DEVELOPMENT											1.66977		1
GOBP_NEURAL_CREST_CELL_DIFFERENTIATION											1.78543		1
GOBP_NEURAL_CREST_CELL_MIGRATION											1.96205		1
GOBP_NEURAL_CREST_FORMATION											1.75769		1
GOBP_NEURON_PROJECTION_EXTENSION											1.8296		1
GOBP_NEUROTRANSMITTER_RECEPTOR_INTERLIZATION											1.58074		1
GOBP_NITRIC_OXIDE_TRANSPORT											1.32441		1
GOBP_ORGANIC_ACID_TRANSMEMBRANE_TRANSPORT											1.78971		1
GOBP_ORGANOPHOSPHATE_CATABOLIC_PROCESS											1.88985		1
GOBP_ORGANOPHOSPHATE_ESTER_TRANSPORT											2.03949		1
GOBP_OUTFLOW_TRACT_MORPHOGENESIS											1.98169		1
GOBP_PARACRINE_SIGLING											1.59894		1
GOBP_PARTURITION											1.32441		1
GOBP_PEPTIDOGLYCAN_METABOLIC_PROCESS											1.31812		1
GOBP_PEPTIDYL_TYROSINE_MODIFICATION											1.68337		1
GOBP_PHOSPHATIDYLINOSITOL_BIOSYNTHETIC_PROCESS											1.85623		1
GOBP_PHOSPHATIDYLINOSITOL_METABOLIC_PROCESS											1.93279		1
GOBP_PHOSPHATIDYLINOSITOL_PHOSPHATE_BIOSYNTHETIC_PROCESS											1.76372		1
GOBP_PHOSPHOLIPID_BIOSYNTHETIC_PROCESS											1.85576		1
GOBP_PHOSPHOLIPID_CATABOLIC_PROCESS											1.96841		1
GOBP_PHOSPHOLIPID_METABOLIC_PROCESS											1.82586		1
GOBP_PHOSPHOLIPID_TRANSPORT											1.93437		1
GOBP_PHOSPHORYLATION											1.67064		1
GOBP_PLATELET_DEGRANULATION											1.63365		1
GOBP_POSITIVE_REGULATION_OF_ANTIGEN_RECEPTOR_MEDIATED_SIGLING_PATHWAY											1.74161		1
GOBP_POSITIVE_REGULATION_OF_AXONOGENESIS											1.93746		1
GOBP_POSITIVE_REGULATION_OF_AXON_EXTENSION											1.91212		1
GOBP_POSITIVE_REGULATION_OF_BICELLULAR_TIGHT_JUNCTION_ASSEMBLY											1.32112		1
GOBP_POSITIVE_REGULATION_OF_B_CELL_RECEPTOR_SIGLING_PATHWAY											1.67026		1
GOBP_POSITIVE_REGULATION_OF_CATALYTIC_ACTIVITY											1.60224		1
GOBP_POSITIVE_REGULATION_OF_CELLULAR_COMPONENT_BIOGENESIS											1.52122		1
GOBP_POSITIVE_REGULATION_OF_CELLULAR_COMPONENT_ORGANIZATION											1.64382		1
GOBP_POSITIVE_REGULATION_OF_CELL_ADHESION											1.65923		1
GOBP_POSITIVE_REGULATION_OF_CELL_DEVELOPMENT											1.84558		1
GOBP_POSITIVE_REGULATION_OF_CELL_DIFFERENTIATION											1.82722		1
GOBP_POSITIVE_REGULATION_OF_CELL_GROWTH											2.06732		1
GOBP_POSITIVE_REGULATION_OF_CELL_GROWTH_INVOLVED_IN_CARDIAC_MUSCLE_CELL_DEVELOPMENT											1.32441		1
GOBP_POSITIVE_REGULATION_OF_CELL_POPULATION_PROLIFERATION											1.73403		1
GOBP_POSITIVE_REGULATION_OF_CELL_PROJECTION_ORGANIZATION											1.57044		1
GOBP_POSITIVE_REGULATION_OF_CELL_SIZE											1.69173		1
GOBP_POSITIVE_REGULATION_OF_CYTOKINE_PRODUCTION_INVOLVED_IN_IMMUNE_RESPONSE											1.90201		1
GOBP_POSITIVE_REGULATION_OF_CYTOSOLIC_CALCIUM_ION_CONCENTRATION_INVOLVED_IN_PHOSPHOLIPASE_C_ACTIVATING_G_PROTEIN_COUPLED_SIGLING_PATHWAY											1.68503		1
GOBP_POSITIVE_REGULATION_OF_DEVELOPMENTAL_GROWTH											1.92266		1
GOBP_POSITIVE_REGULATION_OF_DEVELOPMENTAL_PROCESS											1.83714		1
GOBP_POSITIVE_REGULATION_OF_D_BINDING_TRANSCRIPTION_FACTOR_ACTIVITY											1.76468		1
GOBP_POSITIVE_REGULATION_OF_ENDOTHELIAL_CELL_DEVELOPMENT											1.74707		1
GOBP_POSITIVE_REGULATION_OF_ENDOTHELIAL_CELL_MIGRATION											1.92618		1
GOBP_POSITIVE_REGULATION_OF_ENDOTHELIAL_CELL_PROLIFERATION											2.03585		1
GOBP_POSITIVE_REGULATION_OF_EPITHELIAL_CELL_MIGRATION											1.88158		1
GOBP_POSITIVE_REGULATION_OF_EPITHELIAL_CELL_PROLIFERATION											1.73924		1
GOBP_POSITIVE_REGULATION_OF_FATTY_ACID_TRANSPORT											1.78431		1
GOBP_POSITIVE_REGULATION_OF_GROWTH											1.89418		1
GOBP_POSITIVE_REGULATION_OF_GTPASE_ACTIVITY											1.78812		1
GOBP_POSITIVE_REGULATION_OF_HYDROLASE_ACTIVITY											1.54091		1
GOBP_POSITIVE_REGULATION_OF_IMMUNE_SYSTEM_PROCESS											1.49541		1
GOBP_POSITIVE_REGULATION_OF_JNK_CASCADE											1.78299		1
GOBP_POSITIVE_REGULATION_OF_JUN_KISE_ACTIVITY											1.95587		1
GOBP_POSITIVE_REGULATION_OF_LIPID_TRANSPORT											1.75425		1
GOBP_POSITIVE_REGULATION_OF_LOCOMOTION											2.1374		1
GOBP_POSITIVE_REGULATION_OF_MACROPHAGE_CYTOKINE_PRODUCTION											1.32082		1
GOBP_POSITIVE_REGULATION_OF_MAPK_CASCADE											1.82055		1
GOBP_POSITIVE_REGULATION_OF_MAP_KISE_ACTIVITY											1.92079		1
GOBP_POSITIVE_REGULATION_OF_MIR_TRANSCRIPTION											1.71034		1
GOBP_POSITIVE_REGULATION_OF_MOLECULAR_FUNCTION											1.48786		1
GOBP_POSITIVE_REGULATION_OF_MULTICELLULAR_ORGANISMAL_PROCESS											1.75258		1
GOBP_POSITIVE_REGULATION_OF_NERVOUS_SYSTEM_DEVELOPMENT											1.68972		1
GOBP_POSITIVE_REGULATION_OF_NEUROGENESIS											1.67565		1
GOBP_POSITIVE_REGULATION_OF_NF_KAPPAB_TRANSCRIPTION_FACTOR_ACTIVITY											1.81408		1
GOBP_POSITIVE_REGULATION_OF_NITRIC_OXIDE_METABOLIC_PROCESS											2.04435		1
GOBP_POSITIVE_REGULATION_OF_ODONTOGENESIS											1.59894		1
GOBP_POSITIVE_REGULATION_OF_PHOSPHORUS_METABOLIC_PROCESS											1.8165		1
GOBP_POSITIVE_REGULATION_OF_PROTEIN_METABOLIC_PROCESS											1.40582		1
GOBP_POSITIVE_REGULATION_OF_PROTEIN_MODIFICATION_PROCESS											1.53402		1
GOBP_POSITIVE_REGULATION_OF_PROTEIN_PHOSPHORYLATION											1.81412		1
GOBP_POSITIVE_REGULATION_OF_PROTEIN_SERINE_THREONINE_KISE_ACTIVITY											1.87419		1
GOBP_POSITIVE_REGULATION_OF_SARCOMERE_ORGANIZATION											1.32441		1
GOBP_POSITIVE_REGULATION_OF_VASCULATURE_DEVELOPMENT											1.77964		1
GOBP_POSTSYPTIC_NEUROTRANSMITTER_RECEPTOR_INTERLIZATION											1.58074		1
GOBP_PROSTAGLANDIN_TRANSPORT											2.01446		1
GOBP_PROTEIN_AUTOPHOSPHORYLATION											1.66473		1
GOBP_PROTEIN_KISE_C_ACTIVATING_G_PROTEIN_COUPLED_RECEPTOR_SIGLING_PATHWAY											1.75455		1
GOBP_PROTEIN_LOCALIZATION_TO_CELL_CELL_JUNCTION											1.96452		1
GOBP_PROTEIN_LOCALIZATION_TO_CELL_JUNCTION											1.88576		1
GOBP_REACTIVE_NITROGEN_SPECIES_METABOLIC_PROCESS											1.91881		1
GOBP_REGULATION_OF_ATOMICAL_STRUCTURE_MORPHOGENESIS											1.7962		1
GOBP_REGULATION_OF_ATOMICAL_STRUCTURE_SIZE											1.54849		1
GOBP_REGULATION_OF_ANTIGEN_RECEPTOR_MEDIATED_SIGLING_PATHWAY											1.89937		1
GOBP_REGULATION_OF_AXONOGENESIS											1.71053		1
GOBP_REGULATION_OF_BICELLULAR_TIGHT_JUNCTION_ASSEMBLY											1.99666		1
GOBP_REGULATION_OF_CELLULAR_COMPONENT_MOVEMENT											1.98873		1
GOBP_REGULATION_OF_CELLULAR_COMPONENT_SIZE											1.61355		1
GOBP_REGULATION_OF_CELLULAR_RESPONSE_TO_GROWTH_FACTOR_STIMULUS											1.54436		1
GOBP_REGULATION_OF_CELL_ADHESION											1.66576		1
GOBP_REGULATION_OF_CELL_DEVELOPMENT											1.70895		1
GOBP_REGULATION_OF_CELL_DIFFERENTIATION											1.62817		1
GOBP_REGULATION_OF_CELL_JUNCTION_ASSEMBLY											1.79895		1
GOBP_REGULATION_OF_CELL_MORPHOGENESIS											1.5245		1
GOBP_REGULATION_OF_CELL_POPULATION_PROLIFERATION											1.53953		1
GOBP_REGULATION_OF_CELL_SHAPE											1.5805		1
GOBP_REGULATION_OF_CELL_SIZE											2.03519		1
GOBP_REGULATION_OF_CELL_SUBSTRATE_ADHESION											1.57647		1
GOBP_REGULATION_OF_CHEMOKINE_MEDIATED_SIGLING_PATHWAY											1.61552		1
GOBP_REGULATION_OF_CHEMOTAXIS											1.85053		1
GOBP_REGULATION_OF_DEVELOPMENTAL_GROWTH											1.65266		1
GOBP_REGULATION_OF_D_BINDING_TRANSCRIPTION_FACTOR_ACTIVITY											1.53463		1
GOBP_REGULATION_OF_ENDOTHELIAL_CELL_DEVELOPMENT											1.97485		1
GOBP_REGULATION_OF_ENDOTHELIAL_CELL_DIFFERENTIATION											1.94669		1
GOBP_REGULATION_OF_ENDOTHELIAL_CELL_MIGRATION											1.70294		1
GOBP_REGULATION_OF_EPITHELIAL_CELL_DIFFERENTIATION											2.10809		1
GOBP_REGULATION_OF_EPITHELIAL_CELL_MIGRATION											1.7727		1
GOBP_REGULATION_OF_FATTY_ACID_TRANSPORT											1.7957		1
GOBP_REGULATION_OF_GLYCOPROTEIN_METABOLIC_PROCESS											1.72664		1
GOBP_REGULATION_OF_GROWTH											1.61909		1
GOBP_REGULATION_OF_GTPASE_ACTIVITY											2.02576		1
GOBP_REGULATION_OF_HYDROLASE_ACTIVITY											1.53808		1
GOBP_REGULATION_OF_ICOSANOID_SECRETION											1.80935		1
GOBP_REGULATION_OF_IMMUNE_EFFECTOR_PROCESS											1.6238		1
GOBP_REGULATION_OF_IMMUNE_SYSTEM_PROCESS											1.50752		1
GOBP_REGULATION_OF_INTRACELLULAR_SIGL_TRANSDUCTION											1.39747		1
GOBP_REGULATION_OF_MAP_KISE_ACTIVITY											1.7947		1
GOBP_REGULATION_OF_MEMBRANE_LIPID_DISTRIBUTION											2.0951		1
GOBP_REGULATION_OF_MEMBRANE_PERMEABILITY											1.80698		1
GOBP_REGULATION_OF_MICROVILLUS_ORGANIZATION											1.65045		1
GOBP_REGULATION_OF_MULTICELLULAR_ORGANISMAL_DEVELOPMENT											1.89058		1
GOBP_REGULATION_OF_NEUROGENESIS											1.61372		1
GOBP_REGULATION_OF_NITRIC_OXIDE_METABOLIC_PROCESS											2.08307		1
GOBP_REGULATION_OF_PEPTIDYL_TYROSINE_PHOSPHORYLATION											1.83076		1
GOBP_REGULATION_OF_PHOSPHORUS_METABOLIC_PROCESS											1.68966		1
GOBP_REGULATION_OF_PROTEIN_KISE_ACTIVITY											1.65822		1
GOBP_REGULATION_OF_PROTEIN_MODIFICATION_PROCESS											1.51965		1
GOBP_REGULATION_OF_PROTEIN_PHOSPHORYLATION											1.76082		1
GOBP_REGULATION_OF_PROTEIN_SERINE_THREONINE_KISE_ACTIVITY											1.68874		1
GOBP_REGULATION_OF_REL_SYSTEM_PROCESS											1.80495		1
GOBP_REGULATION_OF_RESPONSE_TO_EXTERL_STIMULUS											1.54409		1
GOBP_REGULATION_OF_RESPONSE_TO_WOUNDING											1.71496		1
GOBP_REGULATION_OF_SMALL_GTPASE_MEDIATED_SIGL_TRANSDUCTION											1.77118		1
GOBP_REGULATION_OF_STEM_CELL_PROLIFERATION											1.8964		1
GOBP_REGULATION_OF_THYROID_HORMONE_GENERATION											1.31992		1
GOBP_REGULATION_OF_TRANSFERASE_ACTIVITY											1.53879		1
GOBP_REGULATION_OF_VASCULAR_PERMEABILITY											2.06661		1
GOBP_REGULATION_OF_VASCULATURE_DEVELOPMENT											1.87277		1
GOBP_REL_FILTRATION											1.93244		1
GOBP_REL_SYSTEM_PROCESS											1.89652		1
GOBP_RESPONSE_TO_CALCIUM_ION											1.78638		1
GOBP_RESPONSE_TO_CYTOKINE											1.45594		1
GOBP_RESPONSE_TO_ENDOGENOUS_STIMULUS											1.38092		1
GOBP_RESPONSE_TO_FLUID_SHEAR_STRESS											1.9067		1
GOBP_RESPONSE_TO_GROWTH_FACTOR											1.6966		1
GOBP_RESPONSE_TO_LAMIR_FLUID_SHEAR_STRESS											1.87161		1
GOBP_RESPONSE_TO_LEPTIN											1.88721		1
GOBP_RESPONSE_TO_LEUKEMIA_INHIBITORY_FACTOR											1.92387		1
GOBP_RESPONSE_TO_OSMOTIC_STRESS											2.05739		1
GOBP_RESPONSE_TO_OZONE											1.57231		1
GOBP_RESPONSE_TO_TRANSFORMING_GROWTH_FACTOR_BETA											1.76669		1
GOBP_RESPONSE_TO_WOUNDING											1.58577		1
GOBP_SEMAPHORIN_PLEXIN_SIGLING_PATHWAY											2.00005		1
GOBP_SEMAPHORIN_PLEXIN_SIGLING_PATHWAY_INVOLVED_IN_NEURON_PROJECTION_GUIDANCE											1.79062		1
GOBP_SMALL_GTPASE_MEDIATED_SIGL_TRANSDUCTION											1.49002		1
GOBP_SMOOTH_MUSCLE_CELL_PROLIFERATION											1.59117		1
GOBP_SPHINGOLIPID_BIOSYNTHETIC_PROCESS											2.07002		1
GOBP_SPHINGOLIPID_METABOLIC_PROCESS											2.06184		1
GOBP_SPHINGOLIPID_TRANSLOCATION											1.58996		1
GOBP_SPHINGOMYELIN_METABOLIC_PROCESS											1.71754		1
GOBP_SPROUTING_ANGIOGENESIS											1.68323		1
GOBP_STEM_CELL_DIFFERENTIATION											1.68898		1
GOBP_STEM_CELL_FATE_COMMITMENT											1.85726		1
GOBP_STEM_CELL_PROLIFERATION											2.30272		1
GOBP_SULFUR_COMPOUND_TRANSPORT											1.81087		1
GOBP_TISSUE_DEVELOPMENT											1.59335		1
GOBP_TISSUE_MIGRATION											1.75111		1
GOBP_TISSUE_MORPHOGENESIS											1.59681		1
GOBP_TRANSEPITHELIAL_TRANSPORT											1.91094		1
GOBP_TRANSFORMING_GROWTH_FACTOR_BETA_RECEPTOR_SIGLING_PATHWAY											1.61687		1
GOBP_TUBE_DEVELOPMENT											1.92156		1
GOBP_TUBE_MORPHOGENESIS											2.00772		1
GOBP_T_CELL_CYTOKINE_PRODUCTION											1.74036		1
GOBP_T_CELL_MEDIATED_IMMUNITY											1.75341		1
GOBP_URATE_TRANSPORT											1.61677		1
GOBP_VASCULAR_PROCESS_IN_CIRCULATORY_SYSTEM											2.35778		1
GOBP_VASCULAR_TRANSPORT											2.04714		1
GOBP_VASCULATURE_DEVELOPMENT											2.14209		1
GOBP_VASCULOGENESIS											2.19636		1
GOBP_VENOUS_BLOOD_VESSEL_DEVELOPMENT											1.78844		1
GOBP_WOUND_HEALING											1.51434		1
GOBP_XENOBIOTIC_EXPORT											1.64732		1
GOBP_XENOBIOTIC_TRANSPORT											2.08881		1
GOBP_XENOBIOTIC_TRANSPORT_ACROSS_BLOOD_BRAIN_BARRIER											1.61677		1
GOBP_CARBON_DIOXIDE_TRANSPORT												1.61268	1
GOBP_GAS_TRANSPORT												1.61268	1
GOBP_NEGATIVE_REGULATION_OF_RESPONSE_TO_D_DAMAGE_STIMULUS												2.47574	1
GOBP_OXYGEN_METABOLIC_PROCESS												1.63724	1
GOBP_POSITIVE_REGULATION_OF_NECROTIC_CELL_DEATH												1.80968	1
GOBP_ORGANONITROGEN_COMPOUND_BIOSYNTHETIC_PROCESS	-1.66439		2.12088		-1.72001		1.75067						0
GOBP_BIOLOGICAL_PROCESS_INVOLVED_IN_INTERACTION_WITH_HOST	-1.94379		2.03154										0
GOBP_BIOLOGICAL_PROCESS_INVOLVED_IN_SYMBIOTIC_INTERACTION	-1.71149		2.0893										0
GOBP_NEGATIVE_REGULATION_OF_UBIQUITIN_PROTEIN_LIGASE_ACTIVITY	-1.75337		2.09901										0
GOBP_NEGATIVE_REGULATION_OF_UBIQUITIN_PROTEIN_TRANSFERASE_ACTIVITY	-1.87332		2.3226										0
GOBP_POSITIVE_REGULATION_OF_T_CELL_MEDIATED_IMMUNITY	-1.88787										1.81742		0
GOBP_REGULATION_OF_T_CELL_MEDIATED_IMMUNITY	-1.81778										1.75754		0
GOBP_REGULATION_OF_UBIQUITIN_PROTEIN_LIGASE_ACTIVITY	-1.79338		2.16074										0
GOBP_REGULATION_OF_UBIQUITIN_PROTEIN_TRANSFERASE_ACTIVITY	-1.82403		1.97816										0
GOBP_RIBOSOMAL_LARGE_SUBUNIT_ASSEMBLY	-2.05635		2.48056										0
GOBP_RIBOSOMAL_LARGE_SUBUNIT_BIOGENESIS	-2.20758		2.91422										0
GOBP_RIBOSOME_ASSEMBLY	-2.23114		2.56172										0
GOBP_PROTEIN_FOLDING				1.73232		-1.64566							0
GOBP_POSITIVE_REGULATION_OF_KISE_ACTIVITY						-1.53381					1.71321		0
GOBP_POSITIVE_REGULATION_OF_PROTEIN_KISE_ACTIVITY						-1.62202					1.68337		0
GOBP_POSITIVE_REGULATION_OF_TRANSFERASE_ACTIVITY						-1.51776					1.59768		0
GOBP_CELLULAR_HORMONE_METABOLIC_PROCESS							2.03328				-1.73983		0
GOBP_NEGATIVE_REGULATION_OF_CYTOKINE_PRODUCTION								-1.85709			1.64323		0
GOBP_REGULATION_OF_NERVOUS_SYSTEM_DEVELOPMENT									-1.6339		1.64207		0
GOBP_RIBOSOME_BIOGENESIS	-2.52495		2.76086		-1.90943	-1.71805	1.83506						-1
GOBP_NCR_PROCESSING	-2.12672		2.03137		-1.87838								-1
GOBP_CALCIUM_INDEPENDENT_CELL_CELL_ADHESION_VIA_PLASMA_MEMBRANE_CELL_ADHESION_MOLECULES								-1.32489	-1.33281		1.32112		-1
GOBP_ANTIGEN_PROCESSING_AND_PRESENTATION_OF_ENDOGENOUS_ANTIGEN	-1.92297												-1
GOBP_ANTIGEN_PROCESSING_AND_PRESENTATION_OF_ENDOGENOUS_PEPTIDE_ANTIGEN	-1.92297												-1
GOBP_ANTIGEN_PROCESSING_AND_PRESENTATION_OF_ENDOGENOUS_PEPTIDE_ANTIGEN_VIA_MHC_CLASS_I_VIA_ER_PATHWAY	-1.66824												-1
GOBP_ANTIGEN_PROCESSING_AND_PRESENTATION_OF_EXOGENOUS_PEPTIDE_ANTIGEN	-1.83888												-1
GOBP_ANTIGEN_PROCESSING_AND_PRESENTATION_OF_EXOGENOUS_PEPTIDE_ANTIGEN_VIA_MHC_CLASS_I	-1.64667												-1
GOBP_ANTIGEN_PROCESSING_AND_PRESENTATION_OF_PEPTIDE_ANTIGEN_VIA_MHC_CLASS_I	-1.89463												-1
GOBP_ANTIMICROBIAL_HUMORAL_IMMUNE_RESPONSE_MEDIATED_BY_ANTIMICROBIAL_PEPTIDE	-1.88069												-1
GOBP_ARP2_3_COMPLEX_MEDIATED_ACTIN_NUCLEATION	-1.81937												-1
GOBP_BIOLOGICAL_PROCESS_INVOLVED_IN_INTERSPECIES_INTERACTION_BETWEEN_ORGANISMS	-1.7674												-1
GOBP_CELLULAR_RESPONSE_TO_INTERFERON_GAMMA	-1.80543												-1
GOBP_COLLAGEN_BIOSYNTHETIC_PROCESS	-1.73185												-1
GOBP_CYTOPLASMIC_TRANSLATIOL_ELONGATION	-1.50548												-1
GOBP_DEFENSE_RESPONSE_TO_GRAM_POSITIVE_BACTERIUM	-1.91129												-1
GOBP_DEFENSE_RESPONSE_TO_OTHER_ORGANISM	-1.55597												-1
GOBP_DEFENSE_RESPONSE_TO_SYMBIONT	-1.91201												-1
GOBP_DETECTION_OF_EXTERL_BIOTIC_STIMULUS	-1.83052												-1
GOBP_DETECTION_OF_OTHER_ORGANISM	-1.78284												-1
GOBP_LINOLEIC_ACID_METABOLIC_PROCESS	-1.70343												-1
GOBP_MATURATION_OF_5_8S_RR	-2.03282												-1
GOBP_MATURATION_OF_SSU_RR	-1.96309												-1
GOBP_MATURATION_OF_SSU_RR_FROM_TRICISTRONIC_RR_TRANSCRIPT_SSU_RR_5_8S_RR_LSU_RR	-1.87345												-1
GOBP_MEMBRANE_BIOGENESIS	-1.91336												-1
GOBP_NEGATIVE_REGULATION_OF_BINDING	-1.80649												-1
GOBP_NEGATIVE_REGULATION_OF_INTE_IMMUNE_RESPONSE	-1.92224												-1
GOBP_NEGATIVE_REGULATION_OF_INSULIN_SECRETION_INVOLVED_IN_CELLULAR_RESPONSE_TO_GLUCOSE_STIMULUS	-1.51953												-1
GOBP_NEGATIVE_REGULATION_OF_MEMBRANE_POTENTIAL	-1.67606												-1
GOBP_NEGATIVE_REGULATION_OF_PROTEIN_DEPHOSPHORYLATION	-1.81458												-1
GOBP_NEGATIVE_REGULATION_OF_RESPONSE_TO_BIOTIC_STIMULUS	-1.86593												-1
GOBP_NEGATIVE_REGULATION_OF_VIRAL_ENTRY_INTO_HOST_CELL	-1.7593												-1
GOBP_NEGATIVE_REGULATION_OF_VIRAL_GENOME_REPLICATION	-2.22207												-1
GOBP_NEGATIVE_REGULATION_OF_VIRAL_LIFE_CYCLE	-1.84988												-1
GOBP_NEGATIVE_REGULATION_OF_VIRAL_PROCESS	-1.96921												-1
GOBP_NON_MEMBRANE_BOUNDED_ORGANELLE_ASSEMBLY	-1.56268												-1
GOBP_POSITIVE_REGULATION_OF_ADAPTIVE_IMMUNE_RESPONSE	-1.96725												-1
GOBP_POSITIVE_REGULATION_OF_CELL_DEATH	-1.50522												-1
GOBP_POSITIVE_REGULATION_OF_COLLAGEN_METABOLIC_PROCESS	-1.77036												-1
GOBP_POSITIVE_REGULATION_OF_GENE_EXPRESSION	-1.48806												-1
GOBP_POSITIVE_REGULATION_OF_LYMPHOCYTE_MEDIATED_IMMUNITY	-1.77008												-1
GOBP_POSITIVE_REGULATION_OF_SIGL_TRANSDUCTION_BY_P53_CLASS_MEDIATOR	-1.7429												-1
GOBP_POSITIVE_REGULATION_OF_TRIGLYCERIDE_METABOLIC_PROCESS	-1.74141												-1
GOBP_POSITIVE_REGULATION_OF_T_CELL_MEDIATED_CYTOTOXICITY	-1.87924												-1
GOBP_POSTTRANSCRIPTIOL_REGULATION_OF_GENE_EXPRESSION	-1.50553												-1
GOBP_REGULATION_OF_ADAPTIVE_IMMUNE_RESPONSE	-1.81524												-1
GOBP_REGULATION_OF_BINDING	-1.6532												-1
GOBP_REGULATION_OF_PRODUCTION_OF_MOLECULAR_MEDIATOR_OF_IMMUNE_RESPONSE	-1.68925												-1
GOBP_REGULATION_OF_T_CELL_MEDIATED_CYTOTOXICITY	-1.75183												-1
GOBP_REGULATION_OF_VIRAL_GENOME_REPLICATION	-1.89351												-1
GOBP_REGULATION_OF_VIRAL_PROCESS	-1.81182												-1
GOBP_RESPONSE_TO_BACTERIUM	-1.74315												-1
GOBP_RESPONSE_TO_INTERFERON_ALPHA	-1.80406												-1
GOBP_RESPONSE_TO_INTERFERON_GAMMA	-1.92644												-1
GOBP_RESPONSE_TO_VIRUS	-1.88552												-1
GOBP_SPLICEOSOMAL_SNRNP_ASSEMBLY	-1.82419												-1
GOBP_VIRAL_GENOME_REPLICATION	-1.75713												-1
GOBP_VIRAL_LIFE_CYCLE	-1.69256												-1
GOBP_VIRAL_PROCESS	-1.70547												-1
GOBP_VIRAL_RELEASE_FROM_HOST_CELL	-1.79079												-1
GOBP_NEGATIVE_REGULATION_OF_DEVELOPMENTAL_GROWTH		-1.98704											-1
GOBP_NEGATIVE_REGULATION_OF_NUCLEOBASE_CONTAINING_COMPOUND_METABOLIC_PROCESS		-1.53695											-1
GOBP_CARDIAC_VENTRICLE_DEVELOPMENT			-1.72559										-1
GOBP_NEGATIVE_REGULATION_OF_EPIDERMIS_DEVELOPMENT			-1.66906										-1
GOBP_NEGATIVE_REGULATION_OF_MYOTUBE_DIFFERENTIATION			-1.6572										-1
GOBP_NEUROTRANSMITTER_RECEPTOR_TRANSPORT			-1.7684										-1
GOBP_NEUROTRANSMITTER_RECEPTOR_TRANSPORT_ENDOSOME_TO_POSTSYPTIC_MEMBRANE			-1.64284										-1
GOBP_PHOTORECEPTOR_CELL_OUTER_SEGMENT_ORGANIZATION			-1.64348										-1
GOBP_POSITIVE_REGULATION_OF_BMP_SIGLING_PATHWAY			-1.74064										-1
GOBP_POSITIVE_REGULATION_OF_RETINOIC_ACID_RECEPTOR_SIGLING_PATHWAY			-1.64831										-1
GOBP_POSITIVE_REGULATION_OF_STEM_CELL_POPULATION_MAINTENCE			-1.59623										-1
GOBP_PROTEIN_CONTAINING_COMPLEX_LOCALIZATION			-1.74159										-1
GOBP_REGULATION_OF_EPIDERMIS_DEVELOPMENT			-1.798										-1
GOBP_REGULATION_OF_NEURON_PROJECTION_ARBORIZATION			-1.62646										-1
GOBP_RESPONSE_TO_VITAMIN_E			-1.58043										-1
GOBP_STEM_CELL_DIVISION			-1.80119										-1
GOBP_VENTRICULAR_SEPTUM_MORPHOGENESIS			-1.77931										-1
GOBP_CILIUM_ORGANIZATION				-1.689									-1
GOBP_REGULATION_OF_AMPA_RECEPTOR_ACTIVITY				-1.9129									-1
GOBP_REGULATION_OF_PROTEIN_KISE_C_SIGLING				-1.83575									-1
GOBP_CELLULAR_MODIFIED_AMINO_ACID_BIOSYNTHETIC_PROCESS					-1.65198								-1
GOBP_CELLULAR_RESPONSE_TO_FOLLICLE_STIMULATING_HORMONE_STIMULUS					-1.543								-1
GOBP_CELLULAR_RESPONSE_TO_GODOTROPIN_STIMULUS					-1.543								-1
GOBP_CYSTEINE_METABOLIC_PROCESS					-1.543								-1
GOBP_DEFENSE_RESPONSE_TO_GRAM_NEGATIVE_BACTERIUM					-1.83774								-1
GOBP_D_DOUBLE_STRAND_BREAK_PROCESSING					-1.62084								-1
GOBP_FIBROBLAST_ACTIVATION					-1.543								-1
GOBP_GLUTAMATE_METABOLIC_PROCESS					-1.62705								-1
GOBP_HEPATIC_STELLATE_CELL_ACTIVATION					-1.543								-1
GOBP_KINETOCHORE_ORGANIZATION					-1.32988								-1
GOBP_MEIOTIC_CHROMOSOME_CONDENSATION					-1.32988								-1
GOBP_NONRIBOSOMAL_PEPTIDE_BIOSYNTHETIC_PROCESS					-1.543								-1
GOBP_POSITIVE_REGULATION_OF_CHROMOSOME_CONDENSATION					-1.32988								-1
GOBP_POSITIVE_REGULATION_OF_LEUKOCYTE_MEDIATED_IMMUNITY					-1.87327								-1
GOBP_REGULATION_OF_CELL_KILLING					-1.73204								-1
GOBP_RESPONSE_TO_FOLLICLE_STIMULATING_HORMONE					-1.543								-1
GOBP_RESPONSE_TO_GODOTROPIN					-1.543								-1
GOBP_RESPONSE_TO_HUMAN_CHORIONIC_GODOTROPIN					-1.543								-1
GOBP_RESPONSE_TO_L_PHENYLALANINE_DERIVATIVE					-1.543								-1
GOBP_RESPONSE_TO_THYROXINE					-1.543								-1
GOBP_SULFUR_AMINO_ACID_METABOLIC_PROCESS					-1.543								-1
GOBP_SYPTIC_VESICLE_MEMBRANE_ORGANIZATION					-1.53327								-1
GOBP_CELLULAR_OXIDANT_DETOXIFICATION						-1.88034							-1
GOBP_CELLULAR_RESPONSE_TO_CADMIUM_ION						-1.71357							-1
GOBP_CELLULAR_RESPONSE_TO_COPPER_ION						-1.82506							-1
GOBP_CELLULAR_RESPONSE_TO_TOXIC_SUBSTANCE						-1.81306							-1
GOBP_CELLULAR_RESPONSE_TO_UV_B						-1.63016							-1
GOBP_CELLULAR_RESPONSE_TO_ZINC_ION						-1.85849							-1
GOBP_CELLULAR_TRIGLYCERIDE_HOMEOSTASIS						-1.83323							-1
GOBP_CELL_CYCLE_G2_M_PHASE_TRANSITION						-1.74676							-1
GOBP_DETOXIFICATION						-1.89879							-1
GOBP_DETOXIFICATION_OF_COPPER_ION						-1.84465							-1
GOBP_D_REPLICATION						-1.62965							-1
GOBP_HUMORAL_IMMUNE_RESPONSE_MEDIATED_BY_CIRCULATING_IMMUNOGLOBULIN						-1.68013							-1
GOBP_MITOTIC_G2_M_TRANSITION_CHECKPOINT						-1.80718							-1
GOBP_NEGATIVE_REGULATION_OF_BLOOD_VESSEL_ENDOTHELIAL_CELL_MIGRATION						-1.78391							-1
GOBP_NEGATIVE_REGULATION_OF_CALCIUM_ION_TRANSMEMBRANE_TRANSPORT						-1.77233							-1
GOBP_NEGATIVE_REGULATION_OF_CALCIUM_ION_TRANSPORT						-1.76453							-1
GOBP_NEGATIVE_REGULATION_OF_CELL_CYCLE_G2_M_PHASE_TRANSITION						-1.82439							-1
GOBP_NEGATIVE_REGULATION_OF_RYANODINE_SENSITIVE_CALCIUM_RELEASE_CHANNEL_ACTIVITY						-1.70263							-1
GOBP_NEGATIVE_REGULATION_OF_VIRAL_TRANSCRIPTION						-1.7508							-1
GOBP_POSITIVE_REGULATION_OF_D_BINDING						-2.00978							-1
GOBP_POSITIVE_REGULATION_OF_PHOSPHATASE_ACTIVITY						-1.77297							-1
GOBP_POSITIVE_REGULATION_OF_PHOSPHOPROTEIN_PHOSPHATASE_ACTIVITY						-1.7471							-1
GOBP_POSITIVE_REGULATION_OF_PROTEIN_DEACETYLATION						-1.83305							-1
GOBP_POSITIVE_REGULATION_OF_SEQUESTERING_OF_CALCIUM_ION						-1.70263							-1
GOBP_POSITIVE_REGULATION_OF_SEQUESTERING_OF_TRIGLYCERIDE						-1.54922							-1
GOBP_PROTEIN_D_COMPLEX_ASSEMBLY						-2.01548							-1
GOBP_PROTEIN_D_COMPLEX_SUBUNIT_ORGANIZATION						-1.91584							-1
GOBP_REGULATION_OF_CELL_COMMUNICATION_BY_ELECTRICAL_COUPLING_INVOLVED_IN_CARDIAC_CONDUCTION						-1.68327							-1
GOBP_REGULATION_OF_CELL_CYCLE_G2_M_PHASE_TRANSITION						-1.82864							-1
GOBP_REGULATION_OF_SEQUESTERING_OF_TRIGLYCERIDE						-1.54922							-1
GOBP_REGULATION_OF_VIRAL_TRANSCRIPTION						-1.71127							-1
GOBP_RESPONSE_TO_ERYTHROPOIETIN						-1.5799							-1
GOBP_RESPONSE_TO_TOXIC_SUBSTANCE						-1.73881							-1
GOBP_RESPONSE_TO_ZINC_ION						-1.93224							-1
GOBP_SEQUESTERING_OF_TRIGLYCERIDE						-1.54922							-1
GOBP_STRESS_RESPONSE_TO_METAL_ION						-1.86419							-1
GOBP_ZINC_ION_HOMEOSTASIS						-1.85297							-1
GOBP_CRANIAL_NERVE_DEVELOPMENT							-1.83257						-1
GOBP_CYTOCHROME_COMPLEX_ASSEMBLY							-1.70773						-1
GOBP_POSITIVE_REGULATION_OF_BIOMINERALIZATION							-1.99767						-1
GOBP_POSITIVE_REGULATION_OF_BONE_MINERALIZATION							-1.97046						-1
GOBP_POSITIVE_REGULATION_OF_OSSIFICATION							-1.98749						-1
GOBP_REGULATION_OF_FAT_CELL_DIFFERENTIATION							-1.84365						-1
GOBP_RESPIRATORY_CHAIN_COMPLEX_IV_ASSEMBLY							-1.70773						-1
GOBP_ALPHA_AMINO_ACID_METABOLIC_PROCESS								-1.69625					-1
GOBP_CELLULAR_COMPONENT_ASSEMBLY_INVOLVED_IN_MORPHOGENESIS								-1.85087					-1
GOBP_CELLULAR_RESPONSE_TO_ALKALOID								-1.68451					-1
GOBP_CORTICAL_CYTOSKELETON_ORGANIZATION								-1.91488					-1
GOBP_CYTOKINETIC_PROCESS								-1.74946					-1
GOBP_FATTY_ACID_BIOSYNTHETIC_PROCESS								-1.69561					-1
GOBP_LATE_ENDOSOME_TO_LYSOSOME_TRANSPORT								-1.76651					-1
GOBP_LUNG_ALVEOLUS_DEVELOPMENT								-1.71605					-1
GOBP_MICROTUBULE_CYTOSKELETON_ORGANIZATION_INVOLVED_IN_MITOSIS								-1.65415					-1
GOBP_MICROTUBULE_DEPOLYMERIZATION								-1.73198					-1
GOBP_TURAL_KILLER_CELL_ACTIVATION_INVOLVED_IN_IMMUNE_RESPONSE								-1.68084					-1
GOBP_TURAL_KILLER_CELL_DEGRANULATION								-1.68084					-1
GOBP_NEGATIVE_REGULATION_OF_ATP_METABOLIC_PROCESS								-1.76258					-1
GOBP_NEGATIVE_REGULATION_OF_INTERLEUKIN_1_BETA_PRODUCTION								-1.58918					-1
GOBP_NEGATIVE_REGULATION_OF_INTERLEUKIN_1_PRODUCTION								-1.58918					-1
GOBP_NEGATIVE_REGULATION_OF_TRANSPORT								-1.66447					-1
GOBP_NEGATIVE_REGULATION_OF_TUMOR_NECROSIS_FACTOR_SUPERFAMILY_CYTOKINE_PRODUCTION								-1.71771					-1
GOBP_OLIGODENDROCYTE_DIFFERENTIATION								-1.73393					-1
GOBP_PERIPHERAL_NERVOUS_SYSTEM_DEVELOPMENT								-1.87566					-1
GOBP_PROTEIN_CONTAINING_COMPLEX_DISASSEMBLY								-1.5616					-1
GOBP_REGULATION_OF_CYTOSKELETON_ORGANIZATION								-1.55955					-1
GOBP_REGULATION_OF_CYTOSOLIC_CALCIUM_ION_CONCENTRATION								-1.71224					-1
GOBP_REGULATION_OF_MICROTUBULE_BASED_PROCESS								-1.66252					-1
GOBP_REGULATION_OF_MICROTUBULE_CYTOSKELETON_ORGANIZATION								-1.63995					-1
GOBP_REGULATION_OF_PROTEIN_POLYMERIZATION								-1.59066					-1
GOBP_RESPONSE_TO_COLD								-1.81989					-1
GOBP_SERINE_FAMILY_AMINO_ACID_METABOLIC_PROCESS								-1.89816					-1
GOBP_UNSATURATED_FATTY_ACID_METABOLIC_PROCESS								-1.77989					-1
GOBP_ASTROCYTE_DIFFERENTIATION									-1.86696				-1
GOBP_AXO_DENDRITIC_TRANSPORT									-1.77528				-1
GOBP_CELLULAR_RESPONSE_TO_ORGANIC_CYCLIC_COMPOUND									-1.52422				-1
GOBP_CYTOSKELETON_DEPENDENT_INTRACELLULAR_TRANSPORT									-1.72238				-1
GOBP_CYTOSKELETON_ORGANIZATION									-1.40125				-1
GOBP_ENSHEATHMENT_OF_NEURONS									-1.77679				-1
GOBP_GLIOGENESIS									-1.91782				-1
GOBP_HEMATOPOIETIC_PROGENITOR_CELL_DIFFERENTIATION									-1.83737				-1
GOBP_MICROTUBULE_BASED_TRANSPORT									-1.77545				-1
GOBP_MONOACYLGLYCEROL_CATABOLIC_PROCESS									-1.63386				-1
GOBP_MONOACYLGLYCEROL_METABOLIC_PROCESS									-1.73426				-1
GOBP_NEGATIVE_REGULATION_OF_CELLULAR_COMPONENT_ORGANIZATION									-1.53489				-1
GOBP_NEGATIVE_REGULATION_OF_CELL_CYCLE									-1.78066				-1
GOBP_NEGATIVE_REGULATION_OF_CELL_CYCLE_PHASE_TRANSITION									-1.79547				-1
GOBP_NEGATIVE_REGULATION_OF_CELL_CYCLE_PROCESS									-1.68534				-1
GOBP_NEGATIVE_REGULATION_OF_MITOTIC_CELL_CYCLE_PHASE_TRANSITION									-1.74076				-1
GOBP_NEUTRAL_LIPID_CATABOLIC_PROCESS									-1.78455				-1
GOBP_REGULATION_OF_CELLULAR_COMPONENT_BIOGENESIS									-1.45331				-1
GOBP_REGULATION_OF_GLIOGENESIS									-1.81637				-1
GOBP_REGULATION_OF_REGULATED_SECRETORY_PATHWAY									-1.88684				-1
GOBP_TRANSPORT_ALONG_MICROTUBULE									-1.77545				-1
GOBP_TRIGLYCERIDE_CATABOLIC_PROCESS									-1.50811				-1
GOBP_VESICLE_MEDIATED_TRANSPORT									-1.40554				-1
GOBP_CHROMATIN_ORGANIZATION										-1.86478			-1
GOBP_CHROMOSOME_ORGANIZATION										-1.94806			-1
GOBP_FATTY_ACID_DERIVATIVE_BIOSYNTHETIC_PROCESS										-1.56122			-1
GOBP_FATTY_ACID_DERIVATIVE_METABOLIC_PROCESS										-1.56122			-1
GOBP_FATTY_ACID_ELONGATION										-1.56122			-1
GOBP_FATTY_ACYL_COA_BIOSYNTHETIC_PROCESS										-1.56122			-1
GOBP_FATTY_ACYL_COA_METABOLIC_PROCESS										-1.56122			-1
GOBP_LONG_CHAIN_FATTY_ACYL_COA_BIOSYNTHETIC_PROCESS										-1.56122			-1
GOBP_LONG_CHAIN_FATTY_ACYL_COA_METABOLIC_PROCESS										-1.56122			-1
GOBP_NUCLEOSIDE_BISPHOSPHATE_BIOSYNTHETIC_PROCESS										-1.68891			-1
GOBP_NUCLEOSIDE_BISPHOSPHATE_METABOLIC_PROCESS										-1.68891			-1
GOBP_ORGANELLE_LOCALIZATION										-1.84492			-1
GOBP_POSITIVE_REGULATION_OF_CELLULAR_BIOSYNTHETIC_PROCESS										-1.82329			-1
GOBP_REGULATION_OF_R_SPLICING										-1.85579			-1
GOBP_RESPONSE_TO_VITAMIN_D										-1.66889			-1
GOBP_SULFUR_COMPOUND_BIOSYNTHETIC_PROCESS										-1.68891			-1
GOBP_THIOESTER_BIOSYNTHETIC_PROCESS										-1.68891			-1
GOBP_THIOESTER_METABOLIC_PROCESS										-1.68891			-1
GOBP_TOR_SIGLING										-1.68956			-1
GOBP_VERY_LONG_CHAIN_FATTY_ACID_METABOLIC_PROCESS										-1.56122			-1
GOBP_ANIMAL_ORGAN_MATURATION											-1.88969		-1
GOBP_ANTIFUNGAL_HUMORAL_RESPONSE											-1.33534		-1
GOBP_BONE_MATURATION											-1.7044		-1
GOBP_BONE_MINERALIZATION_INVOLVED_IN_BONE_MATURATION											-1.3411		-1
GOBP_CAP_DEPENDENT_TRANSLATIOL_INITIATION											-1.69037		-1
GOBP_COLLAGEN_FIBRIL_ORGANIZATION											-1.88765		-1
GOBP_CRANIAL_SUTURE_MORPHOGENESIS											-1.58699		-1
GOBP_EMBRYONIC_CRANIAL_SKELETON_MORPHOGENESIS											-1.7845		-1
GOBP_EMBRYONIC_HINDLIMB_MORPHOGENESIS											-1.85995		-1
GOBP_EMBRYONIC_SKELETAL_SYSTEM_MORPHOGENESIS											-1.82997		-1
GOBP_ESTROGEN_METABOLIC_PROCESS											-1.8134		-1
GOBP_FATTY_ACID_BETA_OXIDATION											-1.94767		-1
GOBP_FATTY_ACID_CATABOLIC_PROCESS											-1.81631		-1
GOBP_HINDLIMB_MORPHOGENESIS											-1.81416		-1
GOBP_LIPID_OXIDATION											-1.83432		-1
GOBP_MEMBRANE_REPOLARIZATION_DURING_VENTRICULAR_CARDIAC_MUSCLE_CELL_ACTION_POTENTIAL											-1.48488		-1
GOBP_MIDGUT_DEVELOPMENT											-1.48534		-1
GOBP_MISMATCH_REPAIR											-1.88859		-1
GOBP_MITOCHONDRIAL_R_CATABOLIC_PROCESS											-1.60397		-1
GOBP_MITOCHONDRIAL_R_PROCESSING											-1.58251		-1
GOBP_MONOCARBOXYLIC_ACID_CATABOLIC_PROCESS											-1.80453		-1
GOBP_MONOCARBOXYLIC_ACID_METABOLIC_PROCESS											-1.48794		-1
GOBP_NEGATIVE_REGULATION_OF_CARTILAGE_DEVELOPMENT											-1.745		-1
GOBP_NEGATIVE_REGULATION_OF_CELL_PROLIFERATION_INVOLVED_IN_KIDNEY_DEVELOPMENT											-1.52923		-1
GOBP_NEGATIVE_REGULATION_OF_D_REPLICATION											-1.70458		-1
GOBP_NEGATIVE_REGULATION_OF_FIBROBLAST_PROLIFERATION											-1.72734		-1
GOBP_NEGATIVE_REGULATION_OF_REPRODUCTIVE_PROCESS											-1.86393		-1
GOBP_NEURAL_FOLD_FORMATION											-1.64414		-1
GOBP_NEUROTRANSMITTER_REUPTAKE											-1.78102		-1
GOBP_NEUROTRANSMITTER_UPTAKE											-1.96525		-1
GOBP_NUCLEAR_ENVELOPE_ORGANIZATION											-1.82381		-1
GOBP_NUCLEAR_MEMBRANE_ORGANIZATION											-1.83609		-1
GOBP_N_ACETYLNEURAMITE_CATABOLIC_PROCESS											-1.3405		-1
GOBP_ORGANIC_ACID_CATABOLIC_PROCESS											-1.64936		-1
GOBP_POSITIVE_REGULATION_OF_FAT_CELL_DIFFERENTIATION											-1.83367		-1
GOBP_PROSTATIC_BUD_FORMATION											-1.64407		-1
GOBP_PROTEIN_LOCALIZATION_TO_ENDOPLASMIC_RETICULUM											-1.68108		-1
GOBP_PROTEIN_O_LINKED_FUCOSYLATION											-1.46217		-1
GOBP_REGULATION_OF_BONE_MINERALIZATION_INVOLVED_IN_BONE_MATURATION											-1.3411		-1
GOBP_REGULATION_OF_BRANCHING_INVOLVED_IN_PROSTATE_GLAND_MORPHOGENESIS											-1.52923		-1
GOBP_REGULATION_OF_INOSITOL_PHOSPHATE_BIOSYNTHETIC_PROCESS											-1.47743		-1
GOBP_REGULATION_OF_LIPID_CATABOLIC_PROCESS											-1.71741		-1
GOBP_REGULATION_OF_MITOCHONDRIAL_R_CATABOLIC_PROCESS											-1.60397		-1
GOBP_REGULATION_OF_PROSTATIC_BUD_FORMATION											-1.64407		-1
GOBP_REGULATION_OF_TYPE_B_PANCREATIC_CELL_PROLIFERATION											-1.56947		-1
GOBP_RETIL_METABOLIC_PROCESS											-1.66957		-1
GOBP_RETINOIC_ACID_METABOLIC_PROCESS											-1.68017		-1
GOBP_TOOTH_ERUPTION											-1.48949		-1
GOBP_TR_METHYLATION											-1.61386		-1
GOBP_TYPE_B_PANCREATIC_CELL_PROLIFERATION											-1.7426		-1
GOBP_VACUOLAR_LOCALIZATION											-1.82566		-1
GOBP_VIRAL_TRANSLATIOL_TERMITION_REINITIATION											-1.62949		-1
GOBP_XENOBIOTIC_METABOLIC_PROCESS											-1.98511		-1
GOBP_DIOL_METABOLIC_PROCESS												-1.79959	-1
GOBP_D_TEMPLATED_TRANSCRIPTION_INITIATION												-1.87724	-1
GOBP_REGULATION_OF_D_TEMPLATED_TRANSCRIPTION_INITIATION												-2.01606	-1
GOBP_REGULATION_OF_POSITIVE_CHEMOTAXIS												-1.74444	-1
GOBP_SENSORY_PERCEPTION_OF_PAIN												-1.9936	-1
GOBP_SPHINGOID_METABOLIC_PROCESS												-1.79959	-1
GOBP_TRANSCRIPTION_INITIATION_FROM_R_POLYMERASE_II_PROMOTER												-2.08201	-1
GOBP_AMIDE_BIOSYNTHETIC_PROCESS	-2.10447		2.46376		-2.09243	-1.51752	1.89867			-1.9345			-2
GOBP_CELLULAR_AMIDE_METABOLIC_PROCESS	-1.81662		2.39251		-1.94609	-1.44205	2.01118			-1.66404			-2
GOBP_CELLULAR_MACROMOLECULE_BIOSYNTHETIC_PROCESS	-1.77743		1.99399		-1.9189	-1.37305	1.66649			-1.8621			-2
GOBP_PEPTIDE_METABOLIC_PROCESS	-2.03325		2.41256		-1.94245	-1.47689	2.07098			-1.68424			-2
GOBP_NCR_METABOLIC_PROCESS	-1.87313		1.65168		-1.82834	-1.51982							-2
GOBP_RR_METABOLIC_PROCESS	-2.39662		2.37147		-1.87307	-1.75797							-2
GOBP_MITOTIC_CYTOKINETIC_PROCESS	-1.83503							-1.74947					-2
GOBP_NUCLEAR_MEMBRANE_REASSEMBLY	-1.87553										-1.67243		-2
GOBP_REGULATION_OF_ACTIN_FILAMENT_BASED_PROCESS	-1.58359							-1.70244					-2
GOBP_RIBONUCLEOPROTEIN_COMPLEX_SUBUNIT_ORGANIZATION	-1.83532					-1.65825							-2
GOBP_COMMON_MYELOID_PROGENITOR_CELL_PROLIFERATION						-1.34056		-1.32774					-2
GOBP_APOPTOTIC_CELL_CLEARANCE								-1.75681				-1.80775	-2
GOBP_GLIAL_CELL_DIFFERENTIATION								-1.64588	-1.86153				-2
GOBP_LONG_CHAIN_FATTY_ACID_BIOSYNTHETIC_PROCESS								-1.75326			-1.77446		-2
GOBP_ORGANIC_ACID_BIOSYNTHETIC_PROCESS								-1.60162	-1.7106				-2
GOBP_REGULATION_OF_CELLULAR_LOCALIZATION								-1.45363	-1.52918				-2
GOBP_R_SPLICING								-1.62795		-1.8965			-2
GOBP_CYTOPLASMIC_TRANSLATION	-2.90094		3.84469		-2.30352	-1.83364	2.70322			-1.80452	-1.81179		-3
GOBP_PEPTIDE_BIOSYNTHETIC_PROCESS	-2.20613		2.61666		-2.09837	-1.54108	2.02255			-1.9272	-1.42705		-3
GOBP_HEPOXILIN_METABOLIC_PROCESS	-1.55775					-1.34056		-1.5441					-3
GOBP_TRANSLATIOL_INITIATION	-1.66165					-1.67672		-1.64964					-3
GOBP_R_SPLICING_VIA_TRANSESTERIFICATION_REACTIONS						-1.52563		-1.75252			-1.53944		-3
GOBP_MR_PROCESSING								-1.4726		-1.86791	-1.44958		-3
GOBP_RIBONUCLEOPROTEIN_COMPLEX_BIOGENESIS	-2.27171		2.17063		-1.81187	-1.79721		-1.51524			-1.49013		-4
GOBP_R_PROCESSING	-1.5981				-1.79211	-1.41147		-1.44717			-1.56957		-5
