# Supplementary material for: Myeloid Cell Replacement Therapy Improves Function in Friedreich Ataxia Mice by Intercellular Mitochondrial Transfer
Source: Research Square preprint supplement (doi:10.21203/rs.3.rs-5932916/v1), 2025-02-11
Supplement: Supplementary file 4 [file 5db8a014971bd32c1288e940.xlsx]

## Sheet: Sheet1
Heart Failure
No	Mouse Symbol	Description	Salinas et al., 2024	Sayles et al., 2023	Perdomini et al., 2014	Li et al., 2019	Cotticelli et al., 2022
1	Nppa	Natriuretic Peptide Precursor A	✓	✓	✓	✓	✓
2	Nppb	Natriuretic Peptide B	✓	✓	✓	✓	✓
3	Aldh1a3	Aldehyde Dehydrogenase 1 Family Member A3	✓		✓		✓
4	Gdf15	Growth Differentiation Factor 15	✓	✓	✓	✓	✓
Hypertrophic Cardiomyopathy
No	Mouse Symbol	Description	Salinas et al., 2024	Sayles et al., 2023	Perdomini et al., 2014	Li et al., 2019	Cotticelli et al., 2022
5	Acta1	Actin Alpha Cardiac Muscle 1	✓	✓	✓	✓	✓
6	Tagln	Transgelin		✓	✓	✓
7	Actc1	Actin Alpha Cardiac Muscle 1		✓	✓	✓
8	Actn1	Alpha Actinin 1		✓	✓	✓
9	Igf1	Insulin-Like Growth Factor-1		✓	✓	✓
10	Ryr2	Ryanodine Receptor 2	✓	✓	✓
11	Atp2a2	ATPase Sarcoplasmic/Endoplasmic Reticulum		✓	✓	✓
12	Atp2a3	ATPase Sarcoplasmic/Endoplasmic Reticulum		✓
13	Cacng6	Calcium Voltage-Gated Channel Auxiliary		✓
14	Itgav	Integrin Subunit Alpha V		✓
15	Mybpc3	Myosin Binding Protein C, Cardiac Type 3		✓
16	Prkag2	Protein Kinase AMP-Activated Non-Catalytic		✓
17	Sgca	Sarcoglycan Alpha		✓
18	Fbxo32	F-Box Only Protein 32			✓
19	Cacna1c	Calcium Voltage-Gated Channel Subunit Alpha			✓
20	Pdcd4	Programmed Cell Death 4			✓
21	Myh6	α-Myosin Heavy Chain			✓
22	Myh7	β-Myosin Heavy Chain			✓
23	Creb5	cAMP Responsive Element Binding Protein 5			✓
Iron Metabolism
No	Mouse Symbol	Description	Salinas et al., 2024	Sayles et al., 2023
24	Trf	Transferrin		✓
25	Frrs1	Ferric Chelate Reductase 1		✓
26	Slc40a1	Ferroportin		✓
27	Slc25a37	Solute Carrier Family 25 Member 37		✓
28	Isca2	Iron-Sulfur Cluster Assembly 2		✓
29	Isca1	Iron-Sulfur Cluster Assembly 1		✓
30	Nubp1	Nucleotide-Binding Protein 1		✓
β-Oxidation and Glycolysis
No	Mouse Symbol	Description	Salinas et al., 2024	Sayles et al., 2023
31	Acadm	Acyl-CoA Dehydrogenase		✓
32	Hadha	Hydroxyacyl-CoA Dehydrogenase α		✓
33	Hadhb	Hydroxyacyl-CoA Dehydrogenase β		✓
34	Eno3	Enolase 3		✓
35	Pfkm	Phosphofructokinase		✓
36	Tpi1	Triosephosphate Isomerase 1		✓
Fibrosis
No	Mouse Symbol	Description	Salinas et al., 2024	Sayles et al., 2023	Perdomini et al., 2014	Li et al., 2019	Cotticelli et al., 2022
37	Postn	Periostin	✓		✓	✓	✓
38	Lgals3	Galectin-3	✓		✓	✓	✓
39	Bag3	Bcl-2-Associated Athanogene 3			✓	✓
40	Timp1	Tissue Inhibitor of Metalloproteinases 1			✓	✓
Electron Transport and TCA Cycle
No	Mouse Symbol	Description	Salinas et al., 2024	Sayles et al., 2023	Perdomini et al., 2014	Li et al., 2019	Cotticelli et al., 2022
41	Ndufb5	NADH Ubiquinone Oxidoreductase		✓
42	Sdhaf2	Succinate Dehydrogenase Assembly		✓
43	Idh3a	Isocitrate Dehydrogenase 3 α			✓
44	Ogdh	Oxoglutarate Dehydrogenase			✓
45	Aco2	Aconitase 2			✓
46	Sdha	Succinate Dehydrogenase			✓
47	Ogdh1	Oxoglutarate Dehydrogenase Like			✓
48	Ndufv3	NADH-Ubiquinone Oxidoreductase			✓
49	Ndufs8	NADH:Ubiquinone Oxidoreductase			✓
50	Sdhaf1	Succinate Dehydrogenase Assembly		✓
Nrf2 Target
No	Mouse Symbol	Description	Salinas et al., 2024	Sayles et al., 2023	Perdomini et al., 2014	Li et al., 2019	Cotticelli et al., 2022
51	Nqo1	NAD(P)H Quinone Dehydrogenase 1	✓
52	Sod2	Superoxide Dismutase 2	✓
