# Supplementary material for: Myeloid Cell Replacement Therapy Improves Function in Friedreich Ataxia Mice by Intercellular Mitochondrial Transfer
Source: Research Square preprint supplement (doi:10.21203/rs.3.rs-5932916/v1), 2025-02-11
Supplement: Supplementary file 5 [file 8d448551e8854c19a9cf75ac.xlsx]

## Sheet: Annotation
MyList	Gene ID	Type	Tax ID	Homologene Gene ID	Homologene Gene Tax ID	Gene Symbol	Description	Biological Process (GO)	Kinase Class (UniProt)	mmu00190 Oxidative phosphorylation - Mu	GO:1902600 proton transmembrane transport	GO:0022904 respiratory electron transport	R-MMU-975634 Retinoid metabolism and transp	GO:0072657 protein localization to membra	GO:0034762 regulation of transmembrane tr	R-MMU-381426 Regulation of Insulin-like Gro	GO:0043086 negative regulation of catalyt	GO:0072330 monocarboxylic acid biosynthet	GO:0060562 epithelial tube morphogenesis	GO:0045807 positive regulation of endocyt
Cox4i1	12857	symbol	M. musculus	12857	M. musculus	Cox4i1	cytochrome c oxidase subunit 4I1	GO:0006123 mitochondrial electron transport, cytochrome c to oxygen;GO:0019646 aerobic electron transport chain;GO:0042775 mitochondrial ATP synthesis coupled electron transport		1	0	1	0	0	0	0	0	0	0	0
Ttr	22139	symbol	M. musculus	22139	M. musculus	Ttr	transthyretin	GO:0006144 purine nucleobase metabolic process;GO:0009112 nucleobase metabolic process;GO:0072521 purine-containing compound metabolic process		1	0	0	1	0	0	0	0	0	0	0
Ndufa13	67184	symbol	M. musculus	67184	M. musculus	Ndufa13	NADH:ubiquinone oxidoreductase subunit A13	GO:0045039 protein insertion into mitochondrial inner membrane;GO:1900119 positive regulation of execution phase of apoptosis;GO:0090151 establishment of protein localization to mitochondrial membrane		1	0	0	0	1	0	0	0	0	0	0
Enpp2	18606	symbol	M. musculus	18606	M. musculus	Enpp2	ectonucleotide pyrophosphatase/phosphodiesterase 2	GO:2000394 positive regulation of lamellipodium morphogenesis;GO:0044849 estrous cycle;GO:2000392 regulation of lamellipodium morphogenesis		0	0	0	0	0	0	1	0	0	0	0
Apoe	11816	symbol	M. musculus	11816	M. musculus	Apoe	apolipoprotein E	GO:0071831 intermediate-density lipoprotein particle clearance;GO:1901627 negative regulation of postsynaptic membrane organization;GO:1902999 negative regulation of phospholipid efflux		1	0	0	1	1	1	1	1	0	0	1
Igfbp2	16008	symbol	M. musculus	16008	M. musculus	Igfbp2	insulin-like growth factor binding protein 2	GO:0043567 regulation of insulin-like growth factor receptor signaling pathway;GO:0042104 positive regulation of activated T cell proliferation;GO:0046006 regulation of activated T cell proliferation		0	0	0	0	0	0	1	0	0	0	0
Atp5g1	11951	gene_synonym	M. musculus	11951	M. musculus	Atp5mc1	ATP synthase membrane subunit c locus 1	GO:0015986 proton motive force-driven ATP synthesis;GO:0006754 ATP biosynthetic process;GO:1902600 proton transmembrane transport		1	1	0	0	0	0	0	0	0	0	0
Ecrg4	78896	symbol	M. musculus	78896	M. musculus	Ecrg4	ECRG4 augurin precursor	GO:2000854 positive regulation of corticosterone secretion;GO:0030103 vasopressin secretion;GO:0051466 positive regulation of corticotropin-releasing hormone secretion		0	0	0	0	0	0	0	0	0	0	0
Folr1	14275	symbol	M. musculus	14275	M. musculus	Folr1	folate receptor alpha	GO:0003147 neural crest cell migration involved in heart formation;GO:0071231 cellular response to folic acid;GO:0060974 cell migration involved in heart formation		0	0	0	1	1	0	0	0	0	1	0
Kcnj13	100040591	symbol	M. musculus	100040591	M. musculus	Kcnj13	potassium inwardly-rectifying channel, subfamily J, member 13	GO:1990573 potassium ion import across plasma membrane;GO:0098659 inorganic cation import across plasma membrane;GO:0099587 inorganic ion import across plasma membrane		0	1	0	0	0	1	0	0	0	0	0
Rbp1	19659	symbol	M. musculus	19659	M. musculus	Rbp1	retinol binding protein 1, cellular	GO:0006776 vitamin A metabolic process;GO:0033189 response to vitamin A;GO:0002138 retinoic acid biosynthetic process		0	0	0	1	0	0	0	0	1	0	0
2900040C04Rik	72893	symbol	M. musculus	72893	M. musculus	2900040C04Rik	RIKEN cDNA 2900040C04 gene	GO:0008150 biological_process		0	0	0	0	0	0	0	0	0	0	0
Arl6ip1	54208	symbol	M. musculus	54208	M. musculus	Arl6ip1	ADP-ribosylation factor-like 6 interacting protein 1	GO:1990809 endoplasmic reticulum tubular network membrane organization;GO:0002038 positive regulation of L-glutamate import across plasma membrane;GO:0071787 endoplasmic reticulum tubular network formation		0	0	0	0	1	1	0	1	0	0	0
Manf	74840	symbol	M. musculus	74840	M. musculus	Manf	mesencephalic astrocyte-derived neurotrophic factor	GO:0002014 vasoconstriction of artery involved in ischemic response to lowering of systemic arterial blood pressure;GO:0001980 regulation of systemic arterial blood pressure by ischemic conditions;GO:0001976 nervous system process involved in regulation of systemic arterial blood pressure		0	0	0	0	0	0	1	0	0	0	0
Chchd10	103172	symbol	M. musculus	103172	M. musculus	Chchd10	coiled-coil-helix-coiled-coil-helix domain containing 10	GO:0090143 nucleoid organization;GO:0090144 mitochondrial nucleoid organization;GO:0031930 mitochondria-nucleus signaling pathway		1	0	0	0	1	0	0	0	0	0	0
Bsg	12215	symbol	M. musculus	12215	M. musculus	Bsg	basigin	GO:1904466 positive regulation of matrix metallopeptidase secretion;GO:1904464 regulation of matrix metallopeptidase secretion;GO:0003159 morphogenesis of an endothelium		0	0	0	0	1	1	1	0	0	1	0
Wfdc2	67701	symbol	M. musculus	67701	M. musculus	Wfdc2	WAP four-disulfide core domain 2	GO:0019731 antibacterial humoral response;GO:0019730 antimicrobial humoral response;GO:0010466 negative regulation of peptidase activity		0	0	0	0	0	0	0	1	0	0	0
Ndufa4	17992	symbol	M. musculus	17992	M. musculus	Ndufa4	Ndufa4, mitochondrial complex associated	GO:1904734 positive regulation of electron transfer activity;GO:1904960 positive regulation of cytochrome-c oxidase activity;GO:1904732 regulation of electron transfer activity		1	0	1	0	0	1	0	0	0	0	0
Ndufb11	104130	symbol	M. musculus	104130	M. musculus	Ndufb11	NADH:ubiquinone oxidoreductase subunit B11	GO:0042776 proton motive force-driven mitochondrial ATP synthesis;GO:0010257 NADH dehydrogenase complex assembly;GO:0032981 mitochondrial respiratory chain complex I assembly		1	0	0	0	0	0	0	0	0	0	0
Fkbp2	14227	symbol	M. musculus	14227	M. musculus	Fkbp2	FK506 binding protein 2	GO:0000413 protein peptidyl-prolyl isomerization;GO:0018208 peptidyl-proline modification;GO:0061077 chaperone-mediated protein folding		0	0	0	0	0	0	0	0	0	0	0
Cd63	12512	symbol	M. musculus	12512	M. musculus	Cd63	CD63 antigen	GO:0035646 endosome to melanosome transport;GO:0043485 endosome to pigment granule transport;GO:0048757 pigment granule maturation		0	0	0	0	0	1	1	0	0	0	1
Sostdc1	66042	symbol	M. musculus	66042	M. musculus	Sostdc1	sclerostin domain containing 1	GO:2000016 negative regulation of determination of dorsal identity;GO:0060648 mammary gland bud morphogenesis;GO:2000015 regulation of determination of dorsal identity		0	0	0	0	0	0	0	0	0	1	0
Spint2	20733	symbol	M. musculus	20733	M. musculus	Spint2	serine protease inhibitor, Kunitz type 2	GO:0060671 epithelial cell differentiation involved in embryonic placenta development;GO:0060672 epithelial cell morphogenesis involved in placental branching;GO:0060670 branching involved in labyrinthine layer morphogenesis		0	0	0	0	0	0	0	1	0	1	0
Cox7b	66142	symbol	M. musculus	66142	M. musculus	Cox7b	cytochrome c oxidase subunit 7B	GO:0006123 mitochondrial electron transport, cytochrome c to oxygen;GO:0019646 aerobic electron transport chain;GO:0042775 mitochondrial ATP synthesis coupled electron transport		1	0	1	0	0	0	0	0	0	0	0
Lars2	102436	symbol	M. musculus	102436	M. musculus	Lars2	leucyl-tRNA synthetase, mitochondrial	GO:0006429 leucyl-tRNA aminoacylation;GO:0006418 tRNA aminoacylation for protein translation;GO:0043039 tRNA aminoacylation		0	0	0	0	0	0	0	0	0	0	0
AY036118	101056014	symbol	M. musculus	101056014	M. musculus	AY036118	cDNA sequence AY036118	GO:0030097 hemopoiesis;GO:0008284 positive regulation of cell population proliferation;GO:0042127 regulation of cell population proliferation		0	0	0	0	0	0	0	0	0	0	0
Emb	13723	symbol	M. musculus	13723	M. musculus	Emb	embigin	GO:0035879 plasma membrane lactate transport;GO:0015727 lactate transport;GO:0035873 lactate transmembrane transport		0	0	0	1	0	1	0	0	0	0	0
Nenf	66208	symbol	M. musculus	66208	M. musculus	Nenf	neuron derived neurotrophic factor	GO:0032099 negative regulation of appetite;GO:0032096 negative regulation of response to food;GO:0032108 negative regulation of response to nutrient levels		0	0	0	0	0	0	0	0	0	0	0
Ndufa11	69875	symbol	M. musculus	69875	M. musculus	Ndufa11	NADH:ubiquinone oxidoreductase subunit A11	GO:0042776 proton motive force-driven mitochondrial ATP synthesis;GO:0010257 NADH dehydrogenase complex assembly;GO:0032981 mitochondrial respiratory chain complex I assembly		1	0	0	0	0	0	0	0	0	0	0
Atp6v0e	11974	symbol	M. musculus	11974	M. musculus	Atp6v0e	ATPase, H+ transporting, lysosomal V0 subunit E	GO:1902600 proton transmembrane transport;GO:0098662 inorganic cation transmembrane transport;GO:0098655 monoatomic cation transmembrane transport		1	1	0	0	0	1	0	0	0	0	0
Ndufc2	68197	symbol	M. musculus	68197	M. musculus	Ndufc2	NADH:ubiquinone oxidoreductase subunit C2	GO:0010918 positive regulation of mitochondrial membrane potential;GO:2001171 positive regulation of ATP biosynthetic process;GO:0030810 positive regulation of nucleotide biosynthetic process		1	0	1	0	0	0	1	0	0	0	0
Ifi27	52668	symbol	M. musculus	52668	M. musculus	Ifi27	interferon, alpha-inducible protein 27	GO:0046825 regulation of protein export from nucleus;GO:0046822 regulation of nucleocytoplasmic transport;GO:0033157 regulation of intracellular protein transport		0	0	0	0	0	0	0	0	0	0	0
Ptgds	19215	symbol	M. musculus	19215	M. musculus	Ptgds	prostaglandin D2 synthase (brain)	GO:1905937 negative regulation of germ cell proliferation;GO:2000255 negative regulation of male germ cell proliferation;GO:2000254 regulation of male germ cell proliferation		0	0	0	0	0	0	0	0	1	0	0
Gm42418	110183	gene_synonym	M. musculus	110183	M. musculus	Rn18s-rs5	18s RNA, related sequence 5	GO:0008150 biological_process		0	0	0	0	0	0	0	0	0	0	0
Igf2	16002	symbol	M. musculus	16002	M. musculus	Igf2	insulin-like growth factor 2	GO:0060720 spongiotrophoblast cell proliferation;GO:0060722 cell proliferation involved in embryonic placenta development;GO:0090214 spongiotrophoblast layer developmental growth		0	0	0	0	0	0	1	0	0	0	0
Ldhb	16832	symbol	M. musculus	16832	M. musculus	Ldhb	lactate dehydrogenase B	GO:0019244 lactate biosynthetic process from pyruvate;GO:0019249 lactate biosynthetic process;GO:0006089 lactate metabolic process		1	0	0	0	0	0	0	0	1	0	0
Camk1d	227541	symbol	M. musculus	227541	M. musculus	Camk1d	calcium/calmodulin-dependent protein kinase ID	GO:0060267 positive regulation of respiratory burst;GO:0032793 positive regulation of CREB transcription factor activity;GO:0060263 regulation of respiratory burst	yes	0	0	0	0	0	0	0	0	0	0	1
Cst3	13010	symbol	M. musculus	13010	M. musculus	Cst3	cystatin C	GO:0010711 negative regulation of collagen catabolic process;GO:0060310 regulation of elastin catabolic process;GO:0060311 negative regulation of elastin catabolic process		0	0	0	0	0	0	1	1	0	0	0
Tmbim4	68212	symbol	M. musculus	68212	M. musculus	Tmbim4	transmembrane BAX inhibitor motif containing 4	GO:0050848 regulation of calcium-mediated signaling;GO:0043524 negative regulation of neuron apoptotic process;GO:0007626 locomotory behavior		0	0	0	0	0	0	0	0	0	0	0
Atp5d	66043	gene_synonym	M. musculus	66043	M. musculus	Atp5f1d	ATP synthase F1 subunit delta	GO:0033615 mitochondrial proton-transporting ATP synthase complex assembly;GO:0043461 proton-transporting ATP synthase complex assembly;GO:0070071 proton-transporting two-sector ATPase complex assembly		1	1	0	0	0	0	0	0	0	0	0
Etfb	110826	symbol	M. musculus	110826	M. musculus	Etfb	electron transferring flavoprotein, beta polypeptide	GO:0033539 fatty acid beta-oxidation using acyl-CoA dehydrogenase;GO:0006635 fatty acid beta-oxidation;GO:0019395 fatty acid oxidation		1	0	1	0	0	0	0	0	0	0	0
Ndufb7	66916	symbol	M. musculus	66916	M. musculus	Ndufb7	NADH:ubiquinone oxidoreductase subunit B7	GO:0042776 proton motive force-driven mitochondrial ATP synthesis;GO:0010257 NADH dehydrogenase complex assembly;GO:0032981 mitochondrial respiratory chain complex I assembly		1	0	0	0	0	0	0	0	0	0	0
Fxyd1	56188	symbol	M. musculus	56188	M. musculus	Fxyd1	FXYD domain-containing ion transport regulator 1	GO:1903797 positive regulation of inorganic anion transmembrane transport;GO:1903278 positive regulation of sodium ion export across plasma membrane;GO:1903795 regulation of inorganic anion transmembrane transport		0	1	0	0	0	1	0	0	0	0	0
Atp1b1	11931	symbol	M. musculus	11931	M. musculus	Atp1b1	ATPase, Na+/K+ transporting, beta 1 polypeptide	GO:1903408 positive regulation of P-type sodium:potassium-exchanging transporter activity;GO:1903279 regulation of calcium:sodium antiporter activity;GO:1903281 positive regulation of calcium:sodium antiporter activity		1	1	1	0	1	1	1	0	0	0	0
Atp5o	28080	gene_synonym	M. musculus	28080	M. musculus	Atp5po	ATP synthase peripheral stalk subunit OSCP	GO:0042776 proton motive force-driven mitochondrial ATP synthesis;GO:0015986 proton motive force-driven ATP synthesis;GO:0006754 ATP biosynthetic process		1	1	0	0	0	0	0	0	0	0	0
Ndufb5	66046	symbol	M. musculus	66046	M. musculus	Ndufb5	NADH:ubiquinone oxidoreductase subunit B5	GO:0042776 proton motive force-driven mitochondrial ATP synthesis;GO:0010257 NADH dehydrogenase complex assembly;GO:0032981 mitochondrial respiratory chain complex I assembly		1	0	0	0	0	0	0	0	0	0	0
Tmem147	69804	symbol	M. musculus	69804	M. musculus	Tmem147	transmembrane protein 147	GO:0036228 protein localization to nuclear inner membrane;GO:0160063 multi-pass transmembrane protein insertion into ER membrane;GO:0090435 protein localization to nuclear envelope		0	0	0	0	1	0	0	0	0	0	0
Cnpy2	56530	symbol	M. musculus	56530	M. musculus	Cnpy2	canopy FGF signaling regulator 2	GO:1905599 positive regulation of low-density lipoprotein receptor activity;GO:0010988 regulation of low-density lipoprotein particle clearance;GO:0010984 regulation of lipoprotein particle clearance		0	0	0	0	0	0	0	0	0	0	0
Gadd45g	23882	symbol	M. musculus	23882	M. musculus	Gadd45g	growth arrest and DNA-damage-inducible 45 gamma	GO:0045063 T-helper 1 cell differentiation;GO:0042088 T-helper 1 type immune response;GO:1900745 positive regulation of p38MAPK cascade		0	0	0	0	0	0	0	1	0	0	0
Fam173a	214917	gene_synonym	M. musculus	214917	M. musculus	Antkmt	adenine nucleotide translocase lysine methyltransferase	GO:1905271 regulation of proton-transporting ATP synthase activity, rotational mechanism;GO:1905273 positive regulation of proton-transporting ATP synthase activity, rotational mechanism;GO:1905706 regulation of mitochondrial ATP synthesis coupled proton transport		0	0	0	0	0	1	0	0	0	0	0

## Sheet: Enrichment
GroupID	Category	Term	Description	LogP	Log(q-value)	Genes	Symbols	InTerm_InList
1_Summary	KEGG Pathway	mmu00190	Oxidative phosphorylation - Mus musculus (house mouse)	-17.5284	-13.2696	11951,11974,12857,17992,28080,66043,66046,66142,66916,67184,68197,69875,104130,103172,16832,110826,11816,11931,22139	Atp5mc1,Atp6v0e,Cox4i1,Ndufa4,Atp5po,Atp5f1d,Ndufb5,Cox7b,Ndufb7,Ndufa13,Ndufc2,Ndufa11,Ndufb11,Chchd10,Ldhb,Etfb,Apoe,Atp1b1,Ttr	19/-
1_Member	KEGG Pathway	mmu00190	Oxidative phosphorylation - Mus musculus (house mouse)	-17.5284	-13.2696	11951,11974,12857,17992,28080,66043,66046,66142,66916,67184,68197,69875,104130	Atp5mc1,Atp6v0e,Cox4i1,Ndufa4,Atp5po,Atp5f1d,Ndufb5,Cox7b,Ndufb7,Ndufa13,Ndufc2,Ndufa11,Ndufb11	13/141
1_Member	GO Biological Processes	GO:0006119	oxidative phosphorylation	-15.0028	-11.0451	12857,28080,66043,66046,66142,66916,67184,68197,69875,103172,104130	Cox4i1,Atp5po,Atp5f1d,Ndufb5,Cox7b,Ndufb7,Ndufa13,Ndufc2,Ndufa11,Chchd10,Ndufb11	11/115
1_Member	Reactome Gene Sets	R-MMU-1428517	Aerobic respiration and respiratory electron transport	-14.6525	-10.8708	11951,12857,16832,17992,28080,66043,66046,66142,66916,67184,68197,104130,110826	Atp5mc1,Cox4i1,Ldhb,Ndufa4,Atp5po,Atp5f1d,Ndufb5,Cox7b,Ndufb7,Ndufa13,Ndufc2,Ndufb11,Etfb	13/233
1_Member	GO Biological Processes	GO:0045333	cellular respiration	-14.0829	-10.4262	12857,28080,66043,66046,66142,66916,67184,68197,69875,103172,104130,110826	Cox4i1,Atp5po,Atp5f1d,Ndufb5,Cox7b,Ndufb7,Ndufa13,Ndufc2,Ndufa11,Chchd10,Ndufb11,Etfb	12/193
1_Member	GO Biological Processes	GO:0015986	proton motive force-driven ATP synthesis	-13.6221	-10.0623	11951,28080,66043,66046,66916,67184,68197,69875,104130	Atp5mc1,Atp5po,Atp5f1d,Ndufb5,Ndufb7,Ndufa13,Ndufc2,Ndufa11,Ndufb11	9/68
1_Member	KEGG Pathway	mmu05415	Diabetic cardiomyopathy - Mus musculus (house mouse)	-13.4709	-10.0409	11951,12857,17992,28080,66043,66046,66142,66916,67184,68197,69875,104130	Atp5mc1,Cox4i1,Ndufa4,Atp5po,Atp5f1d,Ndufb5,Cox7b,Ndufb7,Ndufa13,Ndufc2,Ndufa11,Ndufb11	12/217
1_Member	GO Biological Processes	GO:0009060	aerobic respiration	-13.4546	-10.0409	12857,28080,66043,66046,66142,66916,67184,68197,69875,103172,104130	Cox4i1,Atp5po,Atp5f1d,Ndufb5,Cox7b,Ndufb7,Ndufa13,Ndufc2,Ndufa11,Chchd10,Ndufb11	11/158
1_Member	KEGG Pathway	mmu05208	Chemical carcinogenesis - reactive oxygen species - Mus musculus (house mouse)	-13.1912	-9.83549	11951,12857,17992,28080,66043,66046,66142,66916,67184,68197,69875,104130	Atp5mc1,Cox4i1,Ndufa4,Atp5po,Atp5f1d,Ndufb5,Cox7b,Ndufb7,Ndufa13,Ndufc2,Ndufa11,Ndufb11	12/229
1_Member	KEGG Pathway	mmu04714	Thermogenesis - Mus musculus (house mouse)	-12.9913	-9.69909	11951,12857,17992,28080,66043,66046,66142,66916,67184,68197,69875,104130	Atp5mc1,Cox4i1,Ndufa4,Atp5po,Atp5f1d,Ndufb5,Cox7b,Ndufb7,Ndufa13,Ndufc2,Ndufa11,Ndufb11	12/238
1_Member	GO Biological Processes	GO:0006754	ATP biosynthetic process	-12.9579	-9.69909	11951,28080,66043,66046,66916,67184,68197,69875,104130	Atp5mc1,Atp5po,Atp5f1d,Ndufb5,Ndufb7,Ndufa13,Ndufc2,Ndufa11,Ndufb11	9/80
1_Member	GO Biological Processes	GO:0009206	purine ribonucleoside triphosphate biosynthetic process	-12.3926	-9.18212	11951,28080,66043,66046,66916,67184,68197,69875,104130	Atp5mc1,Atp5po,Atp5f1d,Ndufb5,Ndufb7,Ndufa13,Ndufc2,Ndufa11,Ndufb11	9/92
1_Member	GO Biological Processes	GO:0009145	purine nucleoside triphosphate biosynthetic process	-12.3491	-9.18212	11951,28080,66043,66046,66916,67184,68197,69875,104130	Atp5mc1,Atp5po,Atp5f1d,Ndufb5,Ndufb7,Ndufa13,Ndufc2,Ndufa11,Ndufb11	9/93
1_Member	GO Biological Processes	GO:0015980	energy derivation by oxidation of organic compounds	-12.3025	-9.18212	12857,28080,66043,66046,66142,66916,67184,68197,69875,103172,104130,110826	Cox4i1,Atp5po,Atp5f1d,Ndufb5,Cox7b,Ndufb7,Ndufa13,Ndufc2,Ndufa11,Chchd10,Ndufb11,Etfb	12/272
1_Member	KEGG Pathway	mmu05020	Prion disease - Mus musculus (house mouse)	-12.2836	-9.18212	11951,12857,17992,28080,66043,66046,66142,66916,67184,68197,69875,104130	Atp5mc1,Cox4i1,Ndufa4,Atp5po,Atp5f1d,Ndufb5,Cox7b,Ndufb7,Ndufa13,Ndufc2,Ndufa11,Ndufb11	12/273
1_Member	KEGG Pathway	mmu05012	Parkinson disease - Mus musculus (house mouse)	-12.2648	-9.18212	11951,12857,17992,28080,66043,66046,66142,66916,67184,68197,69875,104130	Atp5mc1,Cox4i1,Ndufa4,Atp5po,Atp5f1d,Ndufb5,Cox7b,Ndufb7,Ndufa13,Ndufc2,Ndufa11,Ndufb11	12/274
1_Member	GO Biological Processes	GO:0009201	ribonucleoside triphosphate biosynthetic process	-12.18	-9.12529	11951,28080,66043,66046,66916,67184,68197,69875,104130	Atp5mc1,Atp5po,Atp5f1d,Ndufb5,Ndufb7,Ndufa13,Ndufc2,Ndufa11,Ndufb11	9/97
1_Member	KEGG Pathway	mmu05014	Amyotrophic lateral sclerosis - Mus musculus (house mouse)	-12.0012	-8.98238	11951,12857,17992,28080,66043,66046,66142,66916,67184,68197,69875,103172,104130	Atp5mc1,Cox4i1,Ndufa4,Atp5po,Atp5f1d,Ndufb5,Cox7b,Ndufb7,Ndufa13,Ndufc2,Ndufa11,Chchd10,Ndufb11	13/375
1_Member	GO Biological Processes	GO:0042776	proton motive force-driven mitochondrial ATP synthesis	-11.9859	-8.98238	28080,66043,66046,66916,67184,68197,69875,104130	Atp5po,Atp5f1d,Ndufb5,Ndufb7,Ndufa13,Ndufc2,Ndufa11,Ndufb11	8/63
1_Member	GO Biological Processes	GO:0009142	nucleoside triphosphate biosynthetic process	-11.9396	-8.95956	11951,28080,66043,66046,66916,67184,68197,69875,104130	Atp5mc1,Atp5po,Atp5f1d,Ndufb5,Ndufb7,Ndufa13,Ndufc2,Ndufa11,Ndufb11	9/103
1_Member	KEGG Pathway	mmu05010	Alzheimer disease - Mus musculus (house mouse)	-11.8001	-8.8423	11816,11951,12857,17992,28080,66043,66046,66142,66916,67184,68197,69875,104130	Apoe,Atp5mc1,Cox4i1,Ndufa4,Atp5po,Atp5f1d,Ndufb5,Cox7b,Ndufb7,Ndufa13,Ndufc2,Ndufa11,Ndufb11	13/389
1_Member	GO Biological Processes	GO:0046034	ATP metabolic process	-11.6887	-8.75217	11931,11951,28080,66043,66046,66916,67184,68197,69875,104130	Atp1b1,Atp5mc1,Atp5po,Atp5f1d,Ndufb5,Ndufb7,Ndufa13,Ndufc2,Ndufa11,Ndufb11	10/163
1_Member	KEGG Pathway	mmu05016	Huntington disease - Mus musculus (house mouse)	-11.6659	-8.74955	11951,12857,17992,28080,66043,66046,66142,66916,67184,68197,69875,104130	Atp5mc1,Cox4i1,Ndufa4,Atp5po,Atp5f1d,Ndufb5,Cox7b,Ndufb7,Ndufa13,Ndufc2,Ndufa11,Ndufb11	12/308
1_Member	CORUM	CORUM:382	Respiratory chain complex I, mitochondrial	-11.5604	-8.66339	17992,66046,66916,67184,68197,69875,104130	Ndufa4,Ndufb5,Ndufb7,Ndufa13,Ndufc2,Ndufa11,Ndufb11	7/40
1_Member	GO Biological Processes	GO:0009205	purine ribonucleoside triphosphate metabolic process	-11.0697	-8.19111	11931,11951,28080,66043,66046,66916,67184,68197,69875,104130	Atp1b1,Atp5mc1,Atp5po,Atp5f1d,Ndufb5,Ndufb7,Ndufa13,Ndufc2,Ndufa11,Ndufb11	10/188
1_Member	GO Biological Processes	GO:0009199	ribonucleoside triphosphate metabolic process	-10.9119	-8.05208	11931,11951,28080,66043,66046,66916,67184,68197,69875,104130	Atp1b1,Atp5mc1,Atp5po,Atp5f1d,Ndufb5,Ndufb7,Ndufa13,Ndufc2,Ndufa11,Ndufb11	10/195
1_Member	Reactome Gene Sets	R-MMU-611105	Respiratory electron transport	-10.8959	-8.05208	12857,17992,66046,66142,66916,67184,68197,104130,110826	Cox4i1,Ndufa4,Ndufb5,Cox7b,Ndufb7,Ndufa13,Ndufc2,Ndufb11,Etfb	9/134
1_Member	GO Biological Processes	GO:0009144	purine nucleoside triphosphate metabolic process	-10.8679	-8.04046	11931,11951,28080,66043,66046,66916,67184,68197,69875,104130	Atp1b1,Atp5mc1,Atp5po,Atp5f1d,Ndufb5,Ndufb7,Ndufa13,Ndufc2,Ndufa11,Ndufb11	10/197
1_Member	GO Biological Processes	GO:0006091	generation of precursor metabolites and energy	-10.8457	-8.03408	12857,28080,66043,66046,66142,66916,67184,68197,69875,103172,104130,110826	Cox4i1,Atp5po,Atp5f1d,Ndufb5,Cox7b,Ndufb7,Ndufa13,Ndufc2,Ndufa11,Chchd10,Ndufb11,Etfb	12/362
1_Member	WikiPathways	WP1248	Oxidative phosphorylation	-10.5927	-7.79634	11951,28080,66043,66046,66916,68197,69875	Atp5mc1,Atp5po,Atp5f1d,Ndufb5,Ndufb7,Ndufc2,Ndufa11	7/54
1_Member	GO Biological Processes	GO:0009141	nucleoside triphosphate metabolic process	-10.5523	-7.7706	11931,11951,28080,66043,66046,66916,67184,68197,69875,104130	Atp1b1,Atp5mc1,Atp5po,Atp5f1d,Ndufb5,Ndufb7,Ndufa13,Ndufc2,Ndufa11,Ndufb11	10/212
1_Member	KEGG Pathway	mmu04932	Non-alcoholic fatty liver disease - Mus musculus (house mouse)	-10.1528	-7.38535	12857,17992,66046,66142,66916,67184,68197,69875,104130	Cox4i1,Ndufa4,Ndufb5,Cox7b,Ndufb7,Ndufa13,Ndufc2,Ndufa11,Ndufb11	9/162
1_Member	GO Biological Processes	GO:0009152	purine ribonucleotide biosynthetic process	-9.89732	-7.14369	11951,28080,66043,66046,66916,67184,68197,69875,104130	Atp5mc1,Atp5po,Atp5f1d,Ndufb5,Ndufb7,Ndufa13,Ndufc2,Ndufa11,Ndufb11	9/173
1_Member	CORUM	CORUM:381	Respiratory chain complex I, mitochondrial	-9.74631	-7.00604	17992,66046,66916,67184,68197,104130	Ndufa4,Ndufb5,Ndufb7,Ndufa13,Ndufc2,Ndufb11	6/37
1_Member	GO Biological Processes	GO:0009260	ribonucleotide biosynthetic process	-9.63753	-6.91022	11951,28080,66043,66046,66916,67184,68197,69875,104130	Atp5mc1,Atp5po,Atp5f1d,Ndufb5,Ndufb7,Ndufa13,Ndufc2,Ndufa11,Ndufb11	9/185
1_Member	GO Biological Processes	GO:0046390	ribose phosphate biosynthetic process	-9.47404	-6.75932	11951,28080,66043,66046,66916,67184,68197,69875,104130	Atp5mc1,Atp5po,Atp5f1d,Ndufb5,Ndufb7,Ndufa13,Ndufc2,Ndufa11,Ndufb11	9/193
1_Member	KEGG Pathway	mmu05022	Pathways of neurodegeneration - multiple diseases - Mus musculus (house mouse)	-9.42383	-6.72135	11951,12857,17992,28080,66043,66046,66142,66916,67184,68197,69875,104130	Atp5mc1,Cox4i1,Ndufa4,Atp5po,Atp5f1d,Ndufb5,Cox7b,Ndufb7,Ndufa13,Ndufc2,Ndufa11,Ndufb11	12/481
1_Member	GO Biological Processes	GO:0072521	purine-containing compound metabolic process	-9.36249	-6.67191	11931,11951,16832,22139,28080,66043,66046,66916,67184,68197,69875,104130	Atp1b1,Atp5mc1,Ldhb,Ttr,Atp5po,Atp5f1d,Ndufb5,Ndufb7,Ndufa13,Ndufc2,Ndufa11,Ndufb11	12/487
1_Member	GO Biological Processes	GO:0006164	purine nucleotide biosynthetic process	-9.33676	-6.65776	11951,28080,66043,66046,66916,67184,68197,69875,104130	Atp5mc1,Atp5po,Atp5f1d,Ndufb5,Ndufb7,Ndufa13,Ndufc2,Ndufa11,Ndufb11	9/200
1_Member	GO Biological Processes	GO:0072522	purine-containing compound biosynthetic process	-9.20447	-6.53675	11951,28080,66043,66046,66916,67184,68197,69875,104130	Atp5mc1,Atp5po,Atp5f1d,Ndufb5,Ndufb7,Ndufa13,Ndufc2,Ndufa11,Ndufb11	9/207
1_Member	WikiPathways	WP295	Electron transport chain	-8.89223	-6.23551	12857,28080,66043,66046,66142,66916,68197	Cox4i1,Atp5po,Atp5f1d,Ndufb5,Cox7b,Ndufb7,Ndufc2	7/93
1_Member	GO Biological Processes	GO:0009165	nucleotide biosynthetic process	-8.7352	-6.08921	11951,28080,66043,66046,66916,67184,68197,69875,104130	Atp5mc1,Atp5po,Atp5f1d,Ndufb5,Ndufb7,Ndufa13,Ndufc2,Ndufa11,Ndufb11	9/234
1_Member	GO Biological Processes	GO:1901293	nucleoside phosphate biosynthetic process	-8.70276	-6.06723	11951,28080,66043,66046,66916,67184,68197,69875,104130	Atp5mc1,Atp5po,Atp5f1d,Ndufb5,Ndufb7,Ndufa13,Ndufc2,Ndufa11,Ndufb11	9/236
1_Member	GO Biological Processes	GO:0055086	nucleobase-containing small molecule metabolic process	-8.61493	-5.98962	11931,11951,16832,22139,28080,66043,66046,66916,67184,68197,69875,104130	Atp1b1,Atp5mc1,Ldhb,Ttr,Atp5po,Atp5f1d,Ndufb5,Ndufb7,Ndufa13,Ndufc2,Ndufa11,Ndufb11	12/567
1_Member	GO Biological Processes	GO:0006163	purine nucleotide metabolic process	-8.52115	-5.90582	11931,11951,16832,28080,66043,66046,66916,67184,68197,69875,104130	Atp1b1,Atp5mc1,Ldhb,Atp5po,Atp5f1d,Ndufb5,Ndufb7,Ndufa13,Ndufc2,Ndufa11,Ndufb11	11/453
1_Member	GO Biological Processes	GO:0010257	NADH dehydrogenase complex assembly	-8.21574	-5.61972	66046,66916,67184,68197,69875,104130	Ndufb5,Ndufb7,Ndufa13,Ndufc2,Ndufa11,Ndufb11	6/65
1_Member	GO Biological Processes	GO:0032981	mitochondrial respiratory chain complex I assembly	-8.21574	-5.61972	66046,66916,67184,68197,69875,104130	Ndufb5,Ndufb7,Ndufa13,Ndufc2,Ndufa11,Ndufb11	6/65
1_Member	GO Biological Processes	GO:0009150	purine ribonucleotide metabolic process	-8.20231	-5.61563	11931,11951,28080,66043,66046,66916,67184,68197,69875,104130	Atp1b1,Atp5mc1,Atp5po,Atp5f1d,Ndufb5,Ndufb7,Ndufa13,Ndufc2,Ndufa11,Ndufb11	10/370
1_Member	GO Biological Processes	GO:0009117	nucleotide metabolic process	-8.02309	-5.44555	11931,11951,16832,28080,66043,66046,66916,67184,68197,69875,104130	Atp1b1,Atp5mc1,Ldhb,Atp5po,Atp5f1d,Ndufb5,Ndufb7,Ndufa13,Ndufc2,Ndufa11,Ndufb11	11/506
1_Member	GO Biological Processes	GO:0009259	ribonucleotide metabolic process	-7.99535	-5.42676	11931,11951,28080,66043,66046,66916,67184,68197,69875,104130	Atp1b1,Atp5mc1,Atp5po,Atp5f1d,Ndufb5,Ndufb7,Ndufa13,Ndufc2,Ndufa11,Ndufb11	10/389
1_Member	GO Biological Processes	GO:0006753	nucleoside phosphate metabolic process	-7.96158	-5.40177	11931,11951,16832,28080,66043,66046,66916,67184,68197,69875,104130	Atp1b1,Atp5mc1,Ldhb,Atp5po,Atp5f1d,Ndufb5,Ndufb7,Ndufa13,Ndufc2,Ndufa11,Ndufb11	11/513
1_Member	GO Biological Processes	GO:0019693	ribose phosphate metabolic process	-7.90109	-5.34988	11931,11951,28080,66043,66046,66916,67184,68197,69875,104130	Atp1b1,Atp5mc1,Atp5po,Atp5f1d,Ndufb5,Ndufb7,Ndufa13,Ndufc2,Ndufa11,Ndufb11	10/398
1_Member	KEGG Pathway	mmu04723	Retrograde endocannabinoid signaling - Mus musculus (house mouse)	-7.3816	-4.83882	17992,66046,66916,67184,68197,69875,104130	Ndufa4,Ndufb5,Ndufb7,Ndufa13,Ndufc2,Ndufa11,Ndufb11	7/153
1_Member	GO Biological Processes	GO:0033108	mitochondrial respiratory chain complex assembly	-6.97952	-4.44501	66046,66916,67184,68197,69875,104130	Ndufb5,Ndufb7,Ndufa13,Ndufc2,Ndufa11,Ndufb11	6/104
1_Member	Reactome Gene Sets	R-MMU-6799198	Complex I biogenesis	-6.54382	-4.01743	66046,66916,67184,68197,104130	Ndufb5,Ndufb7,Ndufa13,Ndufc2,Ndufb11	5/64
1_Member	GO Biological Processes	GO:0090407	organophosphate biosynthetic process	-6.01266	-3.49424	11951,28080,66043,66046,66916,67184,68197,69875,104130	Atp5mc1,Atp5po,Atp5f1d,Ndufb5,Ndufb7,Ndufa13,Ndufc2,Ndufa11,Ndufb11	9/487
1_Member	GO Biological Processes	GO:1901137	carbohydrate derivative biosynthetic process	-5.49503	-2.99213	11951,28080,66043,66046,66916,67184,68197,69875,104130	Atp5mc1,Atp5po,Atp5f1d,Ndufb5,Ndufb7,Ndufa13,Ndufc2,Ndufa11,Ndufb11	9/563
1_Member	GO Biological Processes	GO:0007005	mitochondrion organization	-5.07713	-2.58178	66043,66046,66916,67184,68197,69875,103172,104130	Atp5f1d,Ndufb5,Ndufb7,Ndufa13,Ndufc2,Ndufa11,Chchd10,Ndufb11	8/476
2_Summary	GO Biological Processes	GO:1902600	proton transmembrane transport	-5.89978	-3.38919	11931,11951,11974,28080,66043,56188,100040591	Atp1b1,Atp5mc1,Atp6v0e,Atp5po,Atp5f1d,Fxyd1,Kcnj13	7/-
2_Member	GO Biological Processes	GO:1902600	proton transmembrane transport	-5.89978	-3.38919	11931,11951,11974,28080,66043	Atp1b1,Atp5mc1,Atp6v0e,Atp5po,Atp5f1d	5/86
2_Member	Reactome Gene Sets	R-MMU-163210	Formation of ATP by chemiosmotic coupling	-4.95591	-2.47528	11951,28080,66043	Atp5mc1,Atp5po,Atp5f1d	3/20
2_Member	Reactome Gene Sets	R-MMU-8949613	Cristae formation	-4.95591	-2.47528	11951,28080,66043	Atp5mc1,Atp5po,Atp5f1d	3/20
2_Member	Reactome Gene Sets	R-MMU-1592230	Mitochondrial biogenesis	-4.41099	-1.93754	11951,28080,66043	Atp5mc1,Atp5po,Atp5f1d	3/30
2_Member	GO Biological Processes	GO:0006812	monoatomic cation transport	-3.04899	-0.709292	11931,11951,11974,28080,56188,66043,100040591	Atp1b1,Atp5mc1,Atp6v0e,Atp5po,Fxyd1,Atp5f1d,Kcnj13	7/715
2_Member	GO Biological Processes	GO:0098662	inorganic cation transmembrane transport	-3.02794	-0.698575	11931,11951,11974,28080,66043,100040591	Atp1b1,Atp5mc1,Atp6v0e,Atp5po,Atp5f1d,Kcnj13	6/521
2_Member	GO Biological Processes	GO:0098655	monoatomic cation transmembrane transport	-3.00651	-0.689425	11931,11951,11974,28080,66043,100040591	Atp1b1,Atp5mc1,Atp6v0e,Atp5po,Atp5f1d,Kcnj13	6/526
2_Member	GO Biological Processes	GO:0098660	inorganic ion transmembrane transport	-2.77046	-0.484807	11931,11951,11974,28080,66043,100040591	Atp1b1,Atp5mc1,Atp6v0e,Atp5po,Atp5f1d,Kcnj13	6/585
2_Member	GO Biological Processes	GO:0034220	monoatomic ion transmembrane transport	-2.49237	-0.233585	11931,11951,11974,28080,66043,100040591	Atp1b1,Atp5mc1,Atp6v0e,Atp5po,Atp5f1d,Kcnj13	6/665
3_Summary	GO Biological Processes	GO:0022904	respiratory electron transport chain	-4.19564	-1.72925	12857,66142,68197,110826,17992,11931	Cox4i1,Cox7b,Ndufc2,Etfb,Ndufa4,Atp1b1	6/-
3_Member	GO Biological Processes	GO:0022904	respiratory electron transport chain	-4.19564	-1.72925	12857,66142,68197,110826	Cox4i1,Cox7b,Ndufc2,Etfb	4/98
3_Member	GO Biological Processes	GO:0022900	electron transport chain	-4.03131	-1.57871	12857,66142,68197,110826	Cox4i1,Cox7b,Ndufc2,Etfb	4/108
3_Member	Reactome Gene Sets	R-MMU-9864848	Complex IV assembly	-3.99912	-1.55925	12857,17992,66142	Cox4i1,Ndufa4,Cox7b	3/41
3_Member	Reactome Gene Sets	R-MMU-9707564	Cytoprotection by HMOX1	-3.82098	-1.41346	12857,17992,66142	Cox4i1,Ndufa4,Cox7b	3/47
3_Member	GO Biological Processes	GO:0019646	aerobic electron transport chain	-3.48408	-1.10036	12857,66142,68197	Cox4i1,Cox7b,Ndufc2	3/61
3_Member	Reactome Gene Sets	R-MMU-5628897	TP53 Regulates Metabolic Genes	-3.34496	-0.966997	12857,17992,66142	Cox4i1,Ndufa4,Cox7b	3/68
3_Member	GO Biological Processes	GO:0042775	mitochondrial ATP synthesis coupled electron transport	-3.27208	-0.90539	12857,66142,68197	Cox4i1,Cox7b,Ndufc2	3/72
3_Member	GO Biological Processes	GO:0042773	ATP synthesis coupled electron transport	-3.23721	-0.87606	12857,66142,68197	Cox4i1,Cox7b,Ndufc2	3/74
3_Member	KEGG Pathway	mmu04260	Cardiac muscle contraction - Mus musculus (house mouse)	-3.00372	-0.689425	11931,12857,66142	Atp1b1,Cox4i1,Cox7b	3/89
3_Member	Reactome Gene Sets	R-MMU-9711123	Cellular response to chemical stress	-2.31851	-0.085034	12857,17992,66142	Cox4i1,Ndufa4,Cox7b	3/155
4_Summary	Reactome Gene Sets	R-MMU-975634	Retinoid metabolism and transport	-4.03145	-1.57871	11816,19659,22139,13723,14275	Apoe,Rbp1,Ttr,Emb,Folr1	5/-
4_Member	Reactome Gene Sets	R-MMU-975634	Retinoid metabolism and transport	-4.03145	-1.57871	11816,19659,22139	Apoe,Rbp1,Ttr	3/40
4_Member	Reactome Gene Sets	R-MMU-6806667	Metabolism of fat-soluble vitamins	-3.90687	-1.4806	11816,19659,22139	Apoe,Rbp1,Ttr	3/44
4_Member	Reactome Gene Sets	R-MMU-2187338	Visual phototransduction	-3.03234	-0.698575	11816,19659,22139	Apoe,Rbp1,Ttr	3/87
4_Member	GO Biological Processes	GO:0046942	carboxylic acid transport	-2.44808	-0.193625	11816,13723,14275,19659	Apoe,Emb,Folr1,Rbp1	4/286
4_Member	GO Biological Processes	GO:0015849	organic acid transport	-2.44268	-0.192501	11816,13723,14275,19659	Apoe,Emb,Folr1,Rbp1	4/287
4_Member	GO Biological Processes	GO:0015718	monocarboxylic acid transport	-2.39099	-0.147559	11816,13723,19659	Apoe,Emb,Rbp1	3/146
4_Member	Reactome Gene Sets	R-MMU-9709957	Sensory Perception	-2.17269	0	11816,19659,22139	Apoe,Rbp1,Ttr	3/175
4_Member	Reactome Gene Sets	R-MMU-196854	Metabolism of vitamins and cofactors	-2.15913	0	11816,19659,22139	Apoe,Rbp1,Ttr	3/177
4_Member	GO Biological Processes	GO:0015711	organic anion transport	-2.06082	0	11816,13723,14275,19659	Apoe,Emb,Folr1,Rbp1	4/369
5_Summary	GO Biological Processes	GO:0072657	protein localization to membrane	-3.99849	-1.55925	11816,11931,12215,14275,54208,67184,69804,103172	Apoe,Atp1b1,Bsg,Folr1,Arl6ip1,Ndufa13,Tmem147,Chchd10	8/-
5_Member	GO Biological Processes	GO:0072657	protein localization to membrane	-3.99849	-1.55925	11816,11931,12215,14275,54208,67184,69804	Apoe,Atp1b1,Bsg,Folr1,Arl6ip1,Ndufa13,Tmem147	7/498
5_Member	GO Biological Processes	GO:0051668	localization within membrane	-3.60039	-1.21084	11816,11931,12215,14275,54208,67184,69804	Apoe,Atp1b1,Bsg,Folr1,Arl6ip1,Ndufa13,Tmem147	7/578
5_Member	GO Biological Processes	GO:0090150	establishment of protein localization to membrane	-2.8392	-0.539464	14275,54208,67184,69804	Folr1,Arl6ip1,Ndufa13,Tmem147	4/223
5_Member	GO Biological Processes	GO:0061024	membrane organization	-2.38931	-0.147559	11816,14275,54208,67184,69804,103172	Apoe,Folr1,Arl6ip1,Ndufa13,Tmem147,Chchd10	6/698
6_Summary	GO Biological Processes	GO:0034762	regulation of transmembrane transport	-3.94485	-1.51214	11931,12512,17992,54208,56188,214917,100040591,11816,11974,12215,13723	Atp1b1,Cd63,Ndufa4,Arl6ip1,Fxyd1,Antkmt,Kcnj13,Apoe,Atp6v0e,Bsg,Emb	11/-
6_Member	GO Biological Processes	GO:0034762	regulation of transmembrane transport	-3.94485	-1.51214	11931,12512,17992,54208,56188,214917,100040591	Atp1b1,Cd63,Ndufa4,Arl6ip1,Fxyd1,Antkmt,Kcnj13	7/508
6_Member	GO Biological Processes	GO:0034765	regulation of monoatomic ion transmembrane transport	-3.8554	-1.44172	11931,12512,17992,56188,214917,100040591	Atp1b1,Cd63,Ndufa4,Fxyd1,Antkmt,Kcnj13	6/364
6_Member	GO Biological Processes	GO:0034764	positive regulation of transmembrane transport	-3.71416	-1.31271	11931,17992,54208,56188,214917	Atp1b1,Ndufa4,Arl6ip1,Fxyd1,Antkmt	5/244
6_Member	GO Biological Processes	GO:0034767	positive regulation of monoatomic ion transmembrane transport	-3.27745	-0.90539	11931,17992,56188,214917	Atp1b1,Ndufa4,Fxyd1,Antkmt	4/170
6_Member	GO Biological Processes	GO:1904062	regulation of monoatomic cation transmembrane transport	-3.12677	-0.771082	11931,12512,17992,56188,214917	Atp1b1,Cd63,Ndufa4,Fxyd1,Antkmt	5/328
6_Member	GO Biological Processes	GO:0032414	positive regulation of ion transmembrane transporter activity	-3.10705	-0.756759	11931,17992,214917	Atp1b1,Ndufa4,Antkmt	3/82
6_Member	GO Biological Processes	GO:0043269	regulation of monoatomic ion transport	-3.05834	-0.713378	11931,12512,17992,56188,214917,100040591	Atp1b1,Cd63,Ndufa4,Fxyd1,Antkmt,Kcnj13	6/514
6_Member	GO Biological Processes	GO:0032411	positive regulation of transporter activity	-3.01795	-0.693665	11931,17992,214917	Atp1b1,Ndufa4,Antkmt	3/88
6_Member	GO Biological Processes	GO:0032412	regulation of monoatomic ion transmembrane transporter activity	-2.93524	-0.625851	11931,17992,56188,214917	Atp1b1,Ndufa4,Fxyd1,Antkmt	4/210
6_Member	GO Biological Processes	GO:0022898	regulation of transmembrane transporter activity	-2.86081	-0.55627	11931,17992,56188,214917	Atp1b1,Ndufa4,Fxyd1,Antkmt	4/220
6_Member	GO Biological Processes	GO:0032409	regulation of transporter activity	-2.77627	-0.485968	11931,17992,56188,214917	Atp1b1,Ndufa4,Fxyd1,Antkmt	4/232
6_Member	GO Biological Processes	GO:0043270	positive regulation of monoatomic ion transport	-2.70943	-0.432922	11931,17992,56188,214917	Atp1b1,Ndufa4,Fxyd1,Antkmt	4/242
6_Member	Reactome Gene Sets	R-MMU-382551	Transport of small molecules	-2.5183	-0.255154	11816,11931,11974,12215,13723,56188	Apoe,Atp1b1,Atp6v0e,Bsg,Emb,Fxyd1	6/657
6_Member	GO Biological Processes	GO:1904064	positive regulation of cation transmembrane transport	-2.32633	-0.0887414	11931,56188,214917	Atp1b1,Fxyd1,Antkmt	3/154
6_Member	Reactome Gene Sets	R-MMU-983712	Ion channel transport	-2.22155	-0.00809031	11931,11974,56188	Atp1b1,Atp6v0e,Fxyd1	3/168
6_Member	GO Biological Processes	GO:0006813	potassium ion transport	-2.17269	0	11931,56188,100040591	Atp1b1,Fxyd1,Kcnj13	3/175
7_Summary	Reactome Gene Sets	R-MMU-381426	Regulation of Insulin-like Growth Factor (IGF) transport and uptake by Insulin-like Growth Factor Binding Proteins (IGFBPs)	-3.86821	-1.44828	11816,13010,16002,16008,12215,12512,18606,74840,11931,68197	Apoe,Cst3,Igf2,Igfbp2,Bsg,Cd63,Enpp2,Manf,Atp1b1,Ndufc2	10/-
7_Member	Reactome Gene Sets	R-MMU-381426	Regulation of Insulin-like Growth Factor (IGF) transport and uptake by Insulin-like Growth Factor Binding Proteins (IGFBPs)	-3.86821	-1.44828	11816,13010,16002,16008	Apoe,Cst3,Igf2,Igfbp2	4/119
7_Member	GO Biological Processes	GO:0010632	regulation of epithelial cell migration	-3.65721	-1.26176	11816,12215,12512,16002,18606	Apoe,Bsg,Cd63,Igf2,Enpp2	5/251
7_Member	Reactome Gene Sets	R-MMU-114608	Platelet degranulation	-2.66244	-0.39043	12512,16002,74840	Cd63,Igf2,Manf	3/117
7_Member	Reactome Gene Sets	R-MMU-76005	Response to elevated platelet cytosolic Ca2+	-2.61078	-0.343229	12512,16002,74840	Cd63,Igf2,Manf	3/122
7_Member	Reactome Gene Sets	R-MMU-109582	Hemostasis	-2.27828	-0.0569242	11931,12215,12512,16002,74840	Atp1b1,Bsg,Cd63,Igf2,Manf	5/514
7_Member	GO Biological Processes	GO:0010634	positive regulation of epithelial cell migration	-2.25048	-0.0330931	12215,16002,18606	Bsg,Igf2,Enpp2	3/164
7_Member	GO Biological Processes	GO:0010594	regulation of endothelial cell migration	-2.14573	0	11816,12215,16002	Apoe,Bsg,Igf2	3/179
7_Member	GO Biological Processes	GO:0062013	positive regulation of small molecule metabolic process	-2.06868	0	11816,16002,68197	Apoe,Igf2,Ndufc2	3/191
8_Summary	GO Biological Processes	GO:0043086	negative regulation of catalytic activity	-2.79315	-0.498153	11816,13010,20733,23882,54208,67701	Apoe,Cst3,Spint2,Gadd45g,Arl6ip1,Wfdc2	6/-
8_Member	GO Biological Processes	GO:0043086	negative regulation of catalytic activity	-2.79315	-0.498153	11816,13010,20733,23882,54208,67701	Apoe,Cst3,Spint2,Gadd45g,Arl6ip1,Wfdc2	6/579
8_Member	GO Biological Processes	GO:0010466	negative regulation of peptidase activity	-2.73579	-0.454734	13010,20733,54208,67701	Cst3,Spint2,Arl6ip1,Wfdc2	4/238
8_Member	GO Biological Processes	GO:0051346	negative regulation of hydrolase activity	-2.30441	-0.0750129	13010,20733,54208,67701	Cst3,Spint2,Arl6ip1,Wfdc2	4/314
8_Member	GO Biological Processes	GO:0045861	negative regulation of proteolysis	-2.16593	0	13010,20733,54208,67701	Cst3,Spint2,Arl6ip1,Wfdc2	4/344
9_Summary	GO Biological Processes	GO:0072330	monocarboxylic acid biosynthetic process	-2.2802	-0.0569242	16832,19215,19659	Ldhb,Ptgds,Rbp1	3/-
9_Member	GO Biological Processes	GO:0072330	monocarboxylic acid biosynthetic process	-2.2802	-0.0569242	16832,19215,19659	Ldhb,Ptgds,Rbp1	3/160
10_Summary	GO Biological Processes	GO:0060562	epithelial tube morphogenesis	-2.05277	0	12215,14275,20733,66042	Bsg,Folr1,Spint2,Sostdc1	4/-
10_Member	GO Biological Processes	GO:0060562	epithelial tube morphogenesis	-2.05277	0	12215,14275,20733,66042	Bsg,Folr1,Spint2,Sostdc1	4/371
11_Summary	GO Biological Processes	GO:0045807	positive regulation of endocytosis	-2.05025	0	11816,12512,227541	Apoe,Cd63,Camk1d	3/-
11_Member	GO Biological Processes	GO:0045807	positive regulation of endocytosis	-2.05025	0	11816,12512,227541	Apoe,Cd63,Camk1d	3/194
