# Supplementary material for: Myeloid Cell Replacement Therapy Improves Function in Friedreich Ataxia Mice by Intercellular Mitochondrial Transfer
Source: Research Square preprint supplement (doi:10.21203/rs.3.rs-5932916/v1), 2025-02-11
Supplement: Supplementary file 6 [file 96f3299263817a186e15b9dd.xlsx]

## Sheet: degs_sig_dp_vs_fa
Gene Name	Log2 Fold Change	p-value
Lao1	5.81464	0.0115021
Ccdc192	5.24157	0.0106241
Adm2	5.01884	0.0294099
Tmsb15a	4.53846	0.0281604
Slc12a3	3.98792	1.70375e-05
Slc22a12	3.7542	0.000368546
4932438H23Rik	3.64973	0.0139337
Mt2	3.17314	3.37482e-18
Lrrc52	2.8789	0.000111721
Ctxn3	2.71298	0.00871601
Ms4a4a	2.70892	4.72655e-10
Gm12689	2.66856	0.0211589
Kcnt1	2.49023	0.00135208
Serpina3n	2.46266	1.06726e-07
Apoa1	2.44375	0.0371136
Lcn2	2.43483	2.01913e-06
Timp4	2.42857	5.32646e-10
Fkbp5	2.42669	1.77376e-12
Per2	2.41023	1.24459e-07
Mt1	2.3967	4.1003e-11
Tcf23	2.36387	5.6415e-07
Fam107a	2.35651	1.60614e-07
Tent5b	2.26931	0.00382434
Angptl7	2.26877	0.00012067
Syt12	2.24105	8.88131e-07
Acot1	2.23839	0.000266117
Klk1b26	2.22354	0.000693411
Hif3a	2.21303	0.00269107
Zbtb16	2.14954	7.44979e-05
Clec4d	2.0435	0.00209257
Agt	2.02038	4.53235e-07
Ifi205	2.00492	1.10883e-09
Gabrr2	1.99867	0.0107429
Eno1b	1.99005	0.0433085
Phyhd1	1.96615	0.000275551
Cdkn1a	1.90484	1.1072e-06
Gm28035	1.8772	0.038373
Gm43302	1.86161	0.042275
Arrdc2	1.84145	0.000650092
Inmt	1.83336	0.000172387
Hmox1	1.82579	0.000306332
Amd2	1.81878	0.0100986
Fut2	1.79156	0.0267134
Lvrn	1.78114	0.00425527
Lonrf3	1.77476	0.000175338
Lrg1	1.7483	3.40745e-11
Tacc2	1.74313	0.000145768
Pbld1	1.74042	0.000807978
Slc30a2	1.7205	0.0315169
Lypd8l	1.71539	6.31625e-05
Snca	1.70094	0.0343225
Map3k6	1.67796	7.84123e-05
Nmb	1.65493	0.00180081
Cxcl14	1.64788	8.85823e-06
Gsta3	1.6463	0.000171871
Sec1	1.63411	0.0407715
Fetub	1.59608	0.00412212
Myot	1.55811	2.74073e-05
Fmo2	1.52769	1.37635e-05
Tnni2	1.52766	0.0028715
Srarp	1.50952	0.0324092
Spock2	1.48167	0.000852617
Slc10a6	1.46061	0.0022075
Per1	1.45524	0.010634
Cry1	1.45331	1.05983e-06
Adora2b	1.44761	0.0370281
Ddit4	1.43897	0.00737671
Xdh	1.43866	2.05049e-06
Cnksr1	1.42618	7.96735e-07
Rtn4rl2	1.42553	0.00602834
Csdc2	1.42492	7.46765e-05
Dpep1	1.42045	1.52607e-05
Pfkfb1	1.41507	0.00198359
Agap2	1.40883	1.06471e-07
Vwa3a	1.40573	0.00418233
Nfil3	1.40092	0.000260476
Car4	1.37708	0.00199248
Epop	1.37203	0.00572779
Sult1a1	1.34336	0.00039575
Hspa1a	1.33858	0.000346615
Ccl6	1.33225	0.00297387
Gpr160	1.32034	0.0228546
Chd6	1.30795	2.20704e-06
Ttr	1.29617	0.0260293
Fstl3	1.29454	0.000996371
Tnfrsf12a	1.29058	1.89179e-07
Serpine1	1.29029	0.0037351
Chrd	1.27989	0.00153495
Abra	1.27241	0.000608288
Ifi207	1.27117	0.000116436
Clec12b	1.2521	0.0493246
Gdpd3	1.2452	0.0446456
Plin5	1.23854	0.00390172
Phka1	1.23811	0.000966093
Hspa1l	1.23384	9.76707e-05
Ptgds	1.22431	0.000657208
Shld1	1.2239	0.000160836
Nr4a3	1.22121	0.015858
Lgals4	1.21925	0.013768
Mmp3	1.21694	0.0368081
Plin4	1.20347	0.00381735
Srxn1	1.18702	5.01506e-07
Ninj1	1.18523	9.63412e-08
Prodh	1.18257	0.000184644
Bnip3	1.18191	0.00153775
Eps8l1	1.17284	0.00361879
Cadm2	1.1513	0.0441533
Tmem52	1.1431	0.04994
Olfr1033	1.14022	4.16007e-07
Cebpd	1.13338	0.000798469
Ccr1	1.13278	0.0481317
Gclm	1.12646	0.00207562
Wnt11	1.12074	0.00155274
Ccl9	1.10554	0.00405808
Herpud1	1.09984	0.00374336
Zfp970	1.092	0.0175773
Tsc22d3	1.09131	0.00260162
Slc43a3	1.09131	0.00166586
Hsd11b1	1.08113	7.8499e-05
Gm14327	1.07929	0.0384247
Col28a1	1.07879	0.0144662
Ms4a6c	1.07751	0.00418867
Pla2g12a	1.07746	0.000604889
Hspa1b	1.07736	0.0082506
Kcna2	1.07245	0.000662937
Atg13	1.06835	0.00246229
Osgin1	1.06594	0.00580929
Etfbkmt	1.06022	0.00463189
Igf2bp2	1.05664	4.36257e-05
Tox3	1.05546	0.0298522
Ankrd9	1.04565	0.000141139
Tent5a	1.04477	3.20416e-06
Bcl2l1	1.04255	0.00184228
Ang	1.03697	0.0387661
Ciapin1	1.02689	8.49648e-05
Snta1	1.02644	0.000715853
Apod	1.02475	0.00928992
Syn2	1.02166	0.0420105
Calr3	1.02048	0.00580235
Susd1	1.01481	0.0458693
Tmem144	1.01181	0.0375358
Pde4c	1.00553	0.00831962
Mbd1	1.00272	0.00191779
Ms4a6b	1.00251	0.0122251
Lyve1	0.993291	0.00116467
Cdh19	0.992305	0.000522714
Lox	0.986071	0.0202637
Ms4a6d	0.981199	0.0229066
Ifrd1	0.97877	8.70844e-05
Cdh22	0.973929	0.019713
Dok7	0.972097	0.00120371
Asb11	0.970823	0.00463019
Ly6c1	0.969874	0.0338098
Cebpb	0.96743	0.0126896
Usp2	0.9668	0.0140111
Gadd45g	0.961992	0.0499853
Map7	0.952027	0.0329487
Ier3	0.951003	0.00128488
Pnpla2	0.946722	0.0125022
Ammecr1	0.936295	0.000531725
Lamc2	0.926856	0.000274204
Apex2	0.925604	0.0196268
Pmm1	0.924856	0.0066913
Cys1	0.916737	0.04779
Picalm	0.913963	4.45974e-05
Cry2	0.903577	0.00868563
Dnm3	0.90308	0.0270383
Sema6c	0.90087	0.00503806
Mcf2l	0.900698	0.00927149
Fah	0.900424	0.00469504
Mmrn1	0.898848	0.0174274
Fas	0.89652	0.00281201
Tmem100	0.896455	0.00808852
Rassf4	0.893604	0.0171414
Tinagl1	0.892652	0.0257426
Proser2	0.887579	0.00287639
Penk	0.880976	0.0242603
Trim54	0.87738	0.000859145
Ccn2	0.876833	0.0161661
Fam117b	0.874904	0.0131773
Fry	0.874116	0.0350933
Kcnq4	0.872961	0.0214207
Socs3	0.871501	0.0149843
Art3	0.869116	0.0322961
Slc4a8	0.869077	0.0256387
Mlxipl	0.867815	4.65816e-05
Got1	0.866645	0.0318451
Rhbdl3	0.864214	0.000644986
Hmgcs2	0.857723	0.0302409
Aox1	0.852637	0.0170254
Cryba4	0.851595	0.00631666
Atf3	0.848985	0.0233083
Reln	0.848879	0.0107777
Serinc3	0.847486	4.01672e-05
Myo19	0.846879	0.0117557
Fam181b	0.843127	0.0432605
Adora1	0.841965	0.0233061
Ttll11	0.841877	0.0428523
Car14	0.839948	0.0232959
Slc25a29	0.8389	0.00432583
Chst3	0.838792	0.00809983
Hbegf	0.822608	0.0128419
P2ry2	0.821229	0.00526366
Timp3	0.815462	0.0176089
Rnase4	0.810572	0.0336816
Tfdp2	0.807392	0.0421333
Kalrn	0.804502	0.0100489
Amd1	0.804482	0.031619
Prmt9	0.801739	0.00648793
Pdlim5	0.797924	0.0342449
Mylip	0.784421	0.0238819
Mapk4	0.783774	0.0486122
Fbxo31	0.781075	0.0437377
Gfpt2	0.779736	0.012718
Adam22	0.77146	0.0459231
Msrb1	0.770923	0.00244322
6430548M08Rik	0.765383	0.00106849
Dnajb5	0.763249	0.0261906
Ucp2	0.762802	0.027929
Tmed5	0.762261	0.000741334
Fbxo44	0.756635	0.00865854
Depp1	0.75276	0.0419864
Krt80	0.75179	0.0340834
Ace	0.745822	0.0323054
Rhobtb1	0.745763	0.0435562
Furin	0.743615	0.0269157
Gck	0.743533	0.0441523
Cyp27a1	0.742146	0.0109331
Carmil1	0.740862	0.0156685
Spaar	0.739395	0.0434433
Slco2b1	0.736096	0.00685925
Epn3	0.732068	0.0117677
Slc4a3	0.731156	0.00431231
Slc27a1	0.730375	0.0469646
Sqstm1	0.72598	0.0151
Icosl	0.725872	0.0383467
C7	0.72519	0.034962
Fhl1	0.722106	0.000307241
Dct	0.720435	0.00580592
Bcl6	0.709133	0.0164707
Ppp1r12c	0.709054	0.0094983
Clk4	0.708937	0.0359594
Gm10053	0.707853	0.0299388
Cdc42ep4	0.707517	0.0118711
Uck2	0.707146	0.012213
Errfi1	0.706312	0.0258681
Rgcc	0.705913	0.0390022
Sh3d21	0.70566	0.0283707
Zdhhc14	0.704631	0.00480534
Rasl11b	0.703238	0.00431162
Smim36	0.694503	0.0148862
Rpl3l	0.694231	0.00562337
Ms4a4d	0.691635	0.0261646
Msc	0.688115	0.0407026
Adgrg1	0.686873	0.0463586
Elmod3	0.686799	0.0203879
St3gal5	0.684562	0.0192841
Trim7	0.683618	0.00621936
Aifm2	0.682751	0.0139441
Speg	0.681876	0.00362354
Sidt2	0.680613	0.00907485
Lrrn4cl	0.678801	0.0242272
Htra3	0.678485	0.0277991
Pcp4l1	0.67311	0.048317
Scara5	0.67192	0.0293749
Synpo	0.662959	0.002417
Uhrf1bp1l	0.659757	0.0132494
Noct	0.658141	0.0450707
Mgst1	0.650812	0.0455749
Zfp691	0.650763	0.0168897
Coq10b	0.641842	0.0289866
Rhou	0.640242	0.00467075
Mapk10	0.638015	0.04473
Ttll7	0.633527	0.0303697
Ggt5	0.633102	0.014906
2310057M21Rik	0.629662	0.0169978
Ptp4a3	0.629591	0.0132805
Pim3	0.626455	0.0307876
Atf4	0.623784	0.0227906
Actc1	0.619145	0.0472827
Mcrip2	0.615747	0.0220514
S1pr1	0.614633	0.0450156
Sec31b	0.613567	0.017483
Mast2	0.601133	0.00150114
Myoz2	0.594862	0.022023
Slc3a2	0.594744	0.00344965
Masp1	0.591976	0.0484606
Abhd6	0.591245	0.0136525
Qsox1	0.589415	0.0164563
Sf3b1	0.585038	0.00648522
Lrrfip1	0.582592	0.00853112
Csrp3	0.581109	0.039273
Scn7a	0.579224	0.0277326
Aqp1	0.577664	0.0405937
Slc12a4	0.577451	0.00379204
Kdm6b	0.574743	0.00812154
Arhgap26	0.573694	0.038414
Lyrm1	0.571542	0.02675
Ppp2ca	0.571312	0.0201443
Map1lc3a	0.566662	0.029696
Maco1	0.564439	0.0496971
Zfp672	0.561652	0.0176811
Zkscan5	0.560077	0.0245749
Ehd1	0.555567	0.0318272
Tmem41a	0.555387	0.0308532
Cystm1	0.554351	0.0206945
Mafg	0.554341	0.017198
Cuedc1	0.552433	0.00834111
Card19	0.552297	0.034563
BC034090	0.550584	0.0307378
Abca7	0.545958	0.0264777
Max	0.54515	0.0382457
Cox5a	0.542655	0.0212166
Pkp4	0.538583	0.0132682
Fkbp10	0.534528	0.0451965
Ddx24	0.530757	0.00757272
Snrpn	0.528771	0.0288276
Hspb6	0.527455	0.0226907
Rusc2	0.523661	0.0427192
Rrs1	0.516785	0.0280566
Gsta4	0.513501	0.0155548
Tuba8	0.513209	0.0343659
Gstm1	0.50968	0.0201668
Tead3	0.505789	0.0429244
Coro6	0.504352	0.0359614
C2cd2	0.503429	0.0477415
Galnt15	0.502789	0.0478944
Klhdc3	0.497545	0.0488887
Plcb4	0.496032	0.0143468
Mocs1	0.493549	0.0287659
Itgb1bp2	0.486178	0.0461032
Ell	0.486166	0.0213663
Fth1	0.484111	0.0416402
Usp54	0.484053	0.046454
Adamtsl5	0.478196	0.0461687
Cmklr1	0.474376	0.03749
Pitpnm1	0.470495	0.028028
Mturn	0.470438	0.0285019
Zfp809	0.468018	0.043121
Rab7	0.462984	0.0193153
Itga5	0.461122	0.0198756
Zfp445	0.455907	0.0153646
Sh3bp5l	0.451552	0.0292726
Fads3	0.449261	0.0239143
Lzts2	0.441085	0.0241324
Ppp2r2d	0.415936	0.0347625
Sf1	0.415132	0.0473639
Rab5if	0.414511	0.0257626
Axl	0.401246	0.0475012
Cul7	-0.424122	0.0351138
Hsp90b1	-0.447414	0.0349611
Man2b2	-0.455482	0.0298268
Col5a3	-0.461662	0.0474724
Tns3	-0.463216	0.0490353
Dock7	-0.468448	0.0274544
Ezr	-0.47037	0.0200786
Fam53b	-0.477841	0.0444863
Cdk6	-0.478707	0.0463395
Pigk	-0.482087	0.018091
Tmem106c	-0.491236	0.0402118
Pdia6	-0.497596	0.0309246
Nrp1	-0.50174	0.0489672
Srebf2	-0.502999	0.0206675
Calr	-0.508341	0.0234861
Med6	-0.517084	0.0396464
Mtx3	-0.519482	0.0461267
Agpat2	-0.523171	0.0131325
Golt1b	-0.531539	0.0277948
Nudcd1	-0.533583	0.0409214
Maged2	-0.535287	0.0420919
Recql	-0.541328	0.0253197
Uxs1	-0.542624	0.0256321
Klhl3	-0.551992	0.0396359
Iigp1	-0.558204	0.0283419
Telo2	-0.563563	0.0186555
Cstf2	-0.567053	0.0220521
Igsf1	-0.56761	0.0476306
Plxna4	-0.568019	0.0176354
Sgsh	-0.569311	0.0194637
Pdia3	-0.569757	0.0160252
Cd276	-0.571464	0.0432761
Disp1	-0.573418	0.0254051
Ccnd2	-0.573954	0.0336966
Ecm2	-0.575092	0.00627619
Scai	-0.576896	0.0447106
Erlin2	-0.57817	0.0139662
Dagla	-0.580545	0.0330873
Ptprs	-0.580962	0.00628516
Sorl1	-0.581239	0.0225734
Pigh	-0.582123	0.0473066
Ttll12	-0.582481	0.0104691
Tcof1	-0.587746	0.0235083
Arl4c	-0.591131	0.0237043
Fbn1	-0.594202	0.0425583
Commd10	-0.615205	0.0360169
Tmem132a	-0.621252	0.0110963
Atat1	-0.621357	0.0319985
Tnfrsf21	-0.621882	0.040497
Bcl2	-0.624652	0.0182117
D11Wsu47e	-0.625215	0.0316871
Macroh2a2	-0.62877	0.0492816
Dnaaf10	-0.628844	0.0498744
Tmem260	-0.63063	0.00884955
Col6a3	-0.632486	0.0337353
Cep70	-0.633049	0.0264677
Zfp934	-0.642336	0.0350367
Sft2d1	-0.642919	0.0340433
Zfp65	-0.645063	0.0185786
Prcp	-0.650641	0.0283251
Samd5	-0.652381	0.012601
Mtss1	-0.65605	0.00368653
Pspc1	-0.665439	0.0499761
Nipsnap3b	-0.666083	0.0284959
Tspan18	-0.670643	0.0175711
Epb41l4a	-0.671409	0.026813
Rnft2	-0.672629	0.0496065
Itga6	-0.676926	0.0330606
Tmem39b	-0.67793	0.0234298
Nrarp	-0.681265	0.0462004
Creld2	-0.684551	0.0283672
Mks1	-0.688157	0.0270453
Eif2ak2	-0.689836	0.0351973
Pdcd4	-0.69372	0.00212306
Nsdhl	-0.697735	0.0333344
Sema3c	-0.698489	0.0085996
Pak4	-0.699866	0.00427908
Enpep	-0.701089	0.0129977
Nrp2	-0.703566	0.0309312
Crocc	-0.705297	0.0236273
St6galnac3	-0.706159	0.0300542
Smco4	-0.708544	0.0361777
Nek4	-0.715478	0.0332871
Gsap	-0.718628	0.0444458
Npas2	-0.719385	0.0408082
Col1a1	-0.724961	0.0401087
Poglut3	-0.728806	0.0118094
Ttc8	-0.729045	0.0398858
Prmt2	-0.73159	0.00456383
Parp11	-0.732198	0.0204175
Ptpre	-0.734192	0.0219999
Ncapg2	-0.734972	0.021548
Pxdn	-0.738985	0.00274783
Septin6	-0.74854	0.0167614
Mgl2	-0.74944	0.0303212
Ralgps2	-0.749722	0.0335642
Tbc1d31	-0.75268	0.0426345
Tmem86a	-0.752973	0.00129815
Smyd5	-0.761996	0.00641383
Pdia4	-0.766483	0.00448988
Faim	-0.769795	0.016121
Srgap3	-0.770724	0.0394585
Eepd1	-0.773685	0.0162061
Mcm2	-0.788462	0.0245491
Smc2	-0.7902	0.0375606
Cacna1g	-0.793618	0.0420764
Dcaf4	-0.796078	0.0051635
Tbc1d32	-0.79863	0.0477974
Fadd	-0.803667	0.00264109
Insig1	-0.804144	0.00270298
Klhdc8a	-0.805353	0.0158841
Cd109	-0.80855	0.0468272
Arhgap18	-0.812994	0.0266089
Lgi3	-0.814044	0.0225743
Klhl30	-0.817159	0.0471879
Arhgap28	-0.823956	0.0258151
Nat8l	-0.827548	0.0481912
Rfc3	-0.8287	0.0312284
Mmp15	-0.834381	0.000695086
Bcl6b	-0.835031	0.04037
Aacs	-0.836048	0.0489166
Col6a2	-0.840171	0.00322503
Fam241b	-0.841215	0.0469404
Apc2	-0.842312	0.0127319
Cxcr4	-0.843855	0.0383408
Psme2b	-0.844292	0.0355115
Aldh18a1	-0.845026	0.00186364
Ttf2	-0.850487	0.00666903
Nek3	-0.853345	0.0178867
Pcdh17	-0.854367	0.00403479
Arhgap11a	-0.856382	0.0284048
Lmnb1	-0.860664	0.0146665
Ldlr	-0.866328	0.00524938
Cpxm2	-0.869906	0.0130865
Il16	-0.872476	0.0271767
Col6a6	-0.87376	0.00285422
Adamts12	-0.878378	0.0153182
Shank1	-0.880341	0.0423438
Tmem17	-0.894175	0.033099
Plxnd1	-0.903919	0.00234584
Rrm2	-0.912857	0.0312318
Fndc1	-0.915134	0.0172322
Cers6	-0.91728	0.00298525
Adam19	-0.921381	0.00773066
Fam78a	-0.922567	0.0306487
Osbpl10	-0.9326	0.0437718
Nr1d2	-0.941495	0.0133689
Slc35g1	-0.942809	0.0305658
Tbc1d10c	-0.946519	0.0181436
Sinhcaf	-0.957607	0.0474519
Scn10a	-0.960224	0.00887833
Nrep	-0.961571	0.000787066
Tmem255b	-0.962219	0.0197423
Lmod3	-0.969798	0.0281964
Kif6	-0.971392	0.0300647
Lama3	-0.974251	0.00827635
Mfap3l	-0.978927	0.0291249
Opcml	-0.983321	0.0126407
Sh2d4a	-0.99051	0.0489469
Rapsn	-0.992227	0.027057
Nos2	-0.994781	0.0239476
Mgat3	-0.995697	0.00164582
Igdcc4	-0.99641	0.0221227
Chaf1a	-1.00058	0.0117914
Togaram2	-1.00464	0.0325279
Pcsk5	-1.00669	0.0174036
Hmcn1	-1.0077	1.8725e-05
Fzd3	-1.01268	0.0362487
Tafa3	-1.01666	0.00510838
Gsg1l	-1.02011	0.0170854
Fscn1	-1.02479	0.00418027
Bend4	-1.02823	0.0468927
Ifi44	-1.03436	0.0220214
Rragb	-1.03439	0.0424887
Sdf2l1	-1.03637	0.0193546
Zfp964	-1.03678	0.0207906
Ppp1r14c	-1.04607	0.0171502
Tgif2	-1.04985	0.0361877
Slfn9	-1.05322	0.034849
Rgs16	-1.05547	0.0448174
Cep41	-1.06551	0.00349178
Tpk1	-1.08041	0.025982
Gask1a	-1.08681	0.0409623
Hsd17b7	-1.09097	0.0432186
Mest	-1.09734	0.0112161
Adap1	-1.10046	0.00259571
C1rl	-1.10646	0.00922708
Lingo3	-1.11114	0.0273377
Itgal	-1.11199	0.0317493
Pygl	-1.1147	0.0126302
Zdhhc15	-1.11663	0.0273364
Spon2	-1.11831	0.0121048
Rtl3	-1.12203	0.00352441
Mrnip	-1.12819	0.0164972
Dzank1	-1.1356	0.0437825
Top2a	-1.14224	0.0319227
Nav3	-1.14583	0.00220575
Mdga1	-1.14956	0.00730248
Zfp354b	-1.15315	0.0468338
Rgs7bp	-1.15349	0.0115701
Slc7a4	-1.15474	0.0204648
Foxm1	-1.16516	0.048956
Cyp51	-1.17065	0.000474368
Apol10b	-1.17197	0.00837018
Tnfrsf13b	-1.17769	0.0328393
Efna2	-1.18024	0.0402196
Slc9a2	-1.18648	0.0356597
Tpsb2	-1.18906	0.0096312
Zfp583	-1.19374	0.0174257
Mcm5	-1.20875	0.00288356
Duox1	-1.21067	0.0376343
Slc22a3	-1.21396	0.043519
Dpp4	-1.21508	0.00388813
Dhcr24	-1.21796	0.0228695
Arsi	-1.22684	0.0441356
Col15a1	-1.2331	4.18694e-05
E2f1	-1.23412	0.0212736
Slc25a1	-1.23847	0.0356603
Prr11	-1.24069	0.0454886
Mms22l	-1.24111	0.0239319
Hvcn1	-1.24128	0.00404523
Ccna2	-1.24686	0.0299976
Cdh23	-1.24737	0.000212283
Iqgap3	-1.25269	0.04334
Papln	-1.25659	0.00172487
Jpt2	-1.25834	1.66444e-06
Mycn	-1.25996	0.0148124
Cdca7	-1.26409	0.00230893
Cnr2	-1.27122	0.0193602
Slc46a1	-1.27544	0.0052603
Basp1	-1.27572	0.0118744
Itgb6	-1.28835	0.00477754
4931428F04Rik	-1.29126	0.00191795
Kcnj15	-1.29226	0.0221965
Zim1	-1.29631	0.0105366
Egr1	-1.29805	0.000821655
Fgf16	-1.29838	0.0130206
Lrrn1	-1.30013	0.0337385
Clec12a	-1.32213	0.00499478
Aldh1a2	-1.32919	0.000443345
Atg9b	-1.33152	0.00680454
Sez6l2	-1.33156	0.000913671
Stum	-1.3403	0.00248553
Mblac2	-1.3407	0.0373462
Il1rl1	-1.34089	0.0132794
Nckap5	-1.36989	0.0386673
Has3	-1.39997	0.00309328
Brca1	-1.4061	0.0295371
Sox4	-1.40627	0.000324562
Akr1c19	-1.40917	0.000848726
Mex3a	-1.41372	0.034449
Pbk	-1.41537	0.0262739
Pla2g2d	-1.41681	0.0112155
Ttc39a	-1.42081	0.000873995
Mki67	-1.42829	0.00677899
Shc4	-1.45654	0.0323357
Lsmem1	-1.4696	0.000877018
Klhdc7a	-1.47398	0.00386106
Grhl2	-1.49115	0.0248166
Hells	-1.50046	0.00845882
Cdca3	-1.5035	0.0375294
Kif26b	-1.50842	0.00100298
Dbp	-1.50895	0.0082548
Fut4	-1.50908	0.00878084
Armcx6	-1.51888	0.00679224
Capn6	-1.51917	0.0483867
Tpx2	-1.51925	0.0142841
Bcl11b	-1.52917	0.0299995
Slamf8	-1.54596	0.049297
Cd180	-1.54683	0.00974926
Sqle	-1.54777	0.0230505
Col3a1	-1.55471	2.16775e-06
Fgfr2	-1.56143	0.0186728
Cep55	-1.57368	0.0244844
Rimkla	-1.57799	0.0203205
Aplnr	-1.57804	4.91394e-05
Kit	-1.58298	2.82128e-06
Tmem151a	-1.59248	0.0113605
Lrrc55	-1.5926	0.023629
Ift122	-1.59761	2.98292e-05
Uhrf1	-1.60005	0.00188839
Klf5	-1.62809	0.0472379
Ngfr	-1.64199	0.00477989
Dbh	-1.65432	0.0136039
Dennd2d	-1.66927	0.011929
Col25a1	-1.67121	0.0100737
Ephb1	-1.67678	0.000166431
Odad4	-1.68815	0.0191931
BC055324	-1.7022	0.0162281
Tenm4	-1.70518	0.0276882
Prdm1	-1.70582	0.00265438
A2m	-1.70785	0.00190362
Rad51b	-1.71071	0.0254601
Stmnd1	-1.72626	0.0467138
Ckap2l	-1.73755	0.0119985
Cdcp3	-1.76734	0.0266148
Apln	-1.77114	1.15931e-07
Gramd1c	-1.78098	0.00490227
Pheta2	-1.78206	0.00283497
Lingo1	-1.79377	0.0166385
Ikzf3	-1.79412	0.0469657
Kif20b	-1.81943	0.00507499
Kif15	-1.8354	0.0216254
Rapgefl1	-1.83937	0.000412036
Gbp8	-1.85738	0.0201335
Ccnb1	-1.86683	0.015627
Trip13	-1.86742	0.0259022
Gprin2	-1.87168	0.0457517
B230217C12Rik	-1.89676	0.029349
Scml2	-1.90221	0.00196506
Cxcl10	-1.90254	0.00471513
Neil3	-1.90885	0.0276709
Plxna3	-1.91157	0.000337879
Pclaf	-1.91162	0.0106855
Adam12	-1.92071	0.00711152
Esco2	-1.92518	0.0143448
Actn3	-1.9297	0.0463254
Ky	-1.94696	0.000928446
Cbln1	-1.955	0.00471716
Mybl2	-1.96652	0.0260772
Ect2	-1.98049	0.00592776
Pimreg	-1.98628	0.0290374
Bmp7	-2.00404	0.0278083
Hrob	-2.02335	0.0165832
F2rl3	-2.03555	0.00305962
Iqcg	-2.04083	0.0436715
Ms4a4b	-2.04725	0.00488516
Asic1	-2.05454	0.028582
Timd4	-2.06504	0.03171
Adgre4	-2.08053	0.00359632
Spib	-2.10625	0.012441
Kntc1	-2.12352	0.0158466
Bub1	-2.13263	0.00815339
Plac8	-2.14555	0.0158228
Spdl1	-2.1468	0.0271412
Cxcl9	-2.14978	7.15884e-07
Ephb2	-2.15652	0.00459177
Ankrd42	-2.17112	0.0332504
Efhc1	-2.19308	0.00932705
Gm4841	-2.20113	0.00379248
Dpp6	-2.20707	0.0318008
Tnfrsf11b	-2.21139	0.0126766
Aqp8	-2.21402	0.000593919
Rsph10b	-2.22196	0.0151735
Cst9	-2.2257	0.0406427
Gfap	-2.23208	0.043724
Gal3st2b	-2.246	0.0049482
H2-Oa	-2.26733	0.015274
F5	-2.27006	0.0276019
Tnf	-2.28489	0.00232527
B3galt2	-2.28918	3.88418e-05
Gabrg3	-2.30262	0.0442365
Cblc	-2.31529	0.0211636
Parpbp	-2.33896	0.016355
Dnah12	-2.34453	0.022947
Vat1l	-2.3472	0.0440734
Rad54l	-2.36585	0.00665759
Akap5	-2.37512	1.31339e-06
Pif1	-2.38237	0.0145969
Sun3	-2.38729	0.0308936
Dnase1l3	-2.39087	0.00935411
Slc44a3	-2.39623	0.0413986
Ckmt1	-2.43177	0.00543627
Phf11a	-2.44188	0.0484381
Ltb	-2.47331	0.00159933
Siglecg	-2.49378	0.0342077
Aldh1a7	-2.51213	0.0234461
Serpina9	-2.53031	0.0182341
Cd79a	-2.53863	0.0016124
Blk	-2.53895	0.0316156
Tll2	-2.57825	0.037347
Dnajb3	-2.58275	0.0170282
1700030J22Rik	-2.60521	0.0354274
Fabp7	-2.61087	0.00396056
Robo2	-2.64503	0.000366651
Pabpc4l	-2.65407	0.0358653
Zfp941	-2.70935	0.0258131
Erich3	-2.75409	0.00789893
Nr1d1	-2.80707	1.86526e-23
Gm11992	-2.82325	0.00184185
Tmem102	-2.86669	0.0252204
Cd79b	-2.87464	0.00170268
Tspoap1	-2.97275	0.0285538
Fam163b	-2.9817	0.0285268
Fcrla	-2.99846	0.0256757
Tnfrsf9	-3.08407	0.0116354
H2-DMb2	-3.08929	0.000342665
Xlr4a	-3.09144	0.00170066
Cfap43	-3.09426	0.0313169
Lypd6b	-3.12484	0.00836483
Ppp1r36	-3.13952	0.0303268
Barx2	-3.1446	0.0143129
L1td1	-3.17726	0.0245432
Rprm	-3.18003	0.0358711
Car9	-3.18817	0.0185179
Ms4a1	-3.20087	0.000292952
Cd19	-3.20529	0.000768287
A630076J17Rik	-3.26494	0.0349144
Apoc1	-3.26936	0.00216175
Slain1	-3.2875	0.0341971
Pou2af1	-3.34977	0.00473238
Slamf6	-3.37661	0.00383631
H2-M2	-3.37933	0.0499886
Fxyd3	-3.38022	0.00133916
Fcmr	-3.40344	0.00015346
Cybrd1	-3.42074	0.000323238
Ccdc65	-3.46578	0.025722
Dlec1	-3.57282	0.0448998
Ffar2	-3.5759	0.0180218
Ccdc187	-3.58908	0.0213309
Dnai2	-3.60123	0.00188963
Calhm6	-3.66099	0.0284573
Dynlrb2	-3.66211	0.0291605
Crocc2	-3.72514	0.0036441
Mogat1	-3.75482	0.0447462
Cxcr5	-3.76904	0.00211951
Fabp12	-3.84502	0.0475897
Cd22	-3.85536	3.09919e-05
Aqp5	-3.94917	0.0119959
Klf1	-3.95504	0.0337475
Calcb	-3.96289	0.0392906
Tmc3	-3.97698	0.0378026
Tekt1	-3.99756	0.0326718
Unc79	-3.99771	0.0129581
Pax5	-4.04824	0.000108292
Wnt7b	-4.1328	0.0189493
Frmpd2	-4.14828	0.0158442
Fcer2a	-4.14986	0.00251336
Fam216b	-4.24186	0.0292906
Ly6d	-4.24609	0.000127061
Nkapl	-4.30626	0.00196089
Wfdc2	-4.40578	0.0458744
Cfap91	-4.41276	0.0308891
Ubd	-4.43183	0.00920416
Sowahb	-4.44449	0.0463404
Ak8	-4.46176	0.0347296
Cldn10	-4.50168	0.0296843
Cr2	-4.52471	0.00353788
Ccdc40	-4.55848	0.00721837
Dnah3	-4.5703	0.0204577
Il9r	-4.61547	0.00637126
Apoc3	-4.66172	0.0278985
Gm8369	-4.70899	0.0103603
Epcam	-4.7578	0.00772148
Lrrc74b	-4.95868	0.022753
Apela	-5.0247	0.0498822
Dnah7a	-5.05307	0.0220195
Ehf	-5.06663	0.0249887
Gbp2b	-5.13307	0.0123373
Gdpd2	-5.20913	0.00768483
Drc7	-5.21385	0.0233939
Fcgbp	-5.30209	0.0373936
Kndc1	-5.31484	0.0200602
Mak	-5.31689	0.047609
Ccr6	-5.35064	0.0227807
Jchain	-5.35494	0.000112436
1700007K13Rik	-5.35533	0.00827594
Cd5l	-5.41494	0.00473879
Ccdc78	-5.46466	0.0161489
Esr2	-5.46591	0.0250827
S100a14	-5.54032	0.0344097
Fam3d	-5.57451	0.0326611
Calml3	-5.72499	0.00649871
Gpx2	-5.76371	0.0243883
Cldn7	-5.77397	0.0489737
Tnfrsf13c	-5.88723	0.00271817
Cyp4a12b	-5.9084	0.0405555
Sycp3	-5.97074	0.00350677
Spag16	-6.03138	0.0339431
H2-Eb2	-6.15999	0.00569971
Rsph4a	-6.19205	0.0098779
Dnali1	-6.32075	0.00960837
Ttc29	-6.37117	0.0201405
