# Supplementary material for: Myeloid Cell Replacement Therapy Improves Function in Friedreich Ataxia Mice by Intercellular Mitochondrial Transfer
Source: Research Square preprint supplement (doi:10.21203/rs.3.rs-5932916/v1), 2025-02-11
Supplement: Supplementary file 7 [file 9ecdcff51e6c0e89803884d2.xlsx]

## Sheet: Celltype_vs_LogFC_10.24.24_for_
	Endothelial	CPC	Astrocytes	Neuron	Macrophage	Ependymal	Microglia	Oligo	ABC	OPC	Pericyte	OEG	Up (count)	Down (count)	Common Expression Score
Cox4i1	0.677196	0.111245	1.28591	0.30553	1.21396	1.01212	1.99357	0.634341	0.589309	1.20729	0.6554	0.77889	12	0	12
Ttr	2.56985	0.443109	1.99985	NA	2.52622	2.35428	1.85292	2.63825	1.73839	1.89986	2.11876	2.48095	11	0	11
Ndufa13	0.704597	0.100903	1.53478	0.20899	1.32708	0.81783	2.98616	0.85886	0.896586	NA	0.287061	0.761367	11	0	11
Enpp2	1.94043	-0.265319	1.58775	0.114763	2.22619	1.96255	2.40965	0.867857	0.756872	0.925501	1.10076	2.14931	11	1	10
Apoe	1.32272	0.632568	0.343324	0.528472	1.60767	0.378697	2.43729	1.16417	1.18032	1.21693	0.276616	-0.473657	11	1	10
Igfbp2	2.27993	0.189595	1.7641	0.179247	2.60317	1.74601	5.59361	2.89785	0.854721	1.9734	-0.283471	3.32699	11	1	10
Atp5g1	1.0856	-0.219959	1.71479	0.286466	1.11711	1.12049	5.24444	1.24668	1.56283	1.02624	0.789436	1.27341	11	1	10
Ecrg4	2.85422	0.674911	2.48269	NA	2.92739	0.865477	NA	2.91859	0.964704	1.75397	2.72949	2.4131	10	0	10
Folr1	2.47118	0.335615	2.74246	0.479796	2.52629	1.49539	NA	2.43886	1.84274	NA	1.78221	2.61986	10	0	10
Kcnj13	2.2888	0.221759	1.3351	0.175459	1.82178	1.6936	NA	1.70882	0.836083	NA	1.19457	1.99354	10	0	10
Rbp1	1.16219	0.104967	1.67497	0.406013	1.74144	0.473261	4.57121	2.79734	NA	NA	0.258097	2.89278	10	0	10
2900040C04Rik	1.82781	-0.711032	1.50543	NA	1.78286	1.62782	3.92288	2.20846	1.98696	5.60872	1.11686	3.42493	10	1	9
Arl6ip1	0.972707	NA	1.39687	0.267481	1.54779	1.11924	5.62914	1.04677	0.793691	NA	NA	0.62428	9	0	9
Manf	0.573301	0.211508	NA	0.265286	0.786549	0.43561	0.654951	0.582038	0.687885	NA	NA	0.473731	9	0	9
Chchd10	2.16564	-0.245723	1.79677	0.273742	1.98984	-0.789998	2.54345	1.87424	1.10975	2.53501	0.937714	1.56927	10	2	8
Bsg	-1.20023	NA	1.23533	0.170787	0.961985	1.12642	NA	1.37593	0.415908	1.3806	1.95371	0.733022	9	1	8
Wfdc2	2.34261	0.307373	1.92305	0.314019	2.14411	1.41162	-0.656834	2.66766	0.977817	NA	NA	2.60043	9	1	8
Ndufa4	0.359713	-0.437488	0.902011	0.218993	1.71925	0.624951	NA	0.857366	0.664558	1.78865	NA	1.04503	9	1	8
Ndufb11	0.243898	NA	1.32303	0.296936	1.47712	0.472241	4.52927	0.78117	NA	NA	NA	0.65367	8	0	8
Fkbp2	0.844063	0.510663	0.919185	NA	0.952008	0.575659	NA	0.921087	0.814071	NA	NA	0.820488	8	0	8
Cd63	2.25717	0.172165	0.790155	0.14851	NA	0.75213	2.55119	0.808167	0.646881	NA	-0.544927	NA	8	1	7
Sostdc1	2.54458	-0.273985	1.36158	NA	3.94473	1.45401	NA	2.56083	1.54618	NA	1.82085	2.28068	8	1	7
Spint2	2.19184	-0.324789	0.966595	NA	2.48093	0.525242	3.34244	2.41876	1.12174	NA	NA	2.0473	8	1	7
Cox7b	0.377375	-0.431723	1.20189	0.251014	0.715106	0.628061	4.46066	0.855419	NA	NA	NA	0.641591	8	1	7
Lars2	0.235802	1.11519	0.696534	-0.907477	1.16629	0.16549	3.93961	1.00791	NA	NA	NA	0.651184	8	1	7
AY036118	NA	2.27096	1.39592	-1.16339	1.70138	NA	NA	1.3438	0.797015	0.336294	0.557135	0.891468	8	1	7
Emb	3.05096	NA	0.607797	0.181255	6.07034	0.610206	3.49819	NA	NA	NA	NA	1.63633	7	0	7
Nenf	0.303588	0.420971	1.70549	0.247312	1.08889	NA	NA	1.1926	NA	NA	NA	0.674435	7	0	7
Ndufa11	0.540115	NA	1.63524	NA	2.19441	0.485055	NA	1.13204	NA	1.89069	NA	1.71228	7	0	7
Atp6v0e	0.217803	0.320348	NA	NA	1.20424	0.659358	NA	1.34881	1.23945	NA	NA	1.17384	7	0	7
Ndufc2	0.171689	NA	1.2874	0.255406	1.50238	NA	1.04743	0.57939	NA	NA	NA	0.786694	7	0	7
Ifi27	NA	0.118975	1.68652	0.293402	1.00938	0.246718	4.36722	0.713647	NA	NA	NA	NA	7	0	7
Ptgds	2.12739	0.403703	1.99292	0.245496	1.62042	1.91405	NA	-0.498045	0.588405	NA	-0.399336	0.755822	8	2	6
Gm42418	0.251736	1.80917	1.50555	-1.25126	1.56392	NA	0.898799	1.66311	-0.448304	NA	0.543457	0.633427	8	2	6
Igf2	2.82221	0.313352	1.8877	NA	NA	2.60366	3.83923	2.7365	NA	NA	-1.00594	2.9045	7	1	6
Ldhb	1.49485	-0.343288	1.10357	0.544762	0.963344	0.565097	NA	0.999331	0.974981	NA	NA	NA	7	1	6
Camk1d	0.616965	1.22793	0.914175	-0.760191	1.09379	0.178538	NA	1.65606	NA	NA	NA	0.740579	7	1	6
Cst3	0.553845	0.444605	-0.887132	0.348212	NA	1.09373	0.996898	2.02228	NA	1.51642	NA	NA	7	1	6
Tmbim4	0.138064	0.348414	NA	0.343619	0.165731	0.547121	3.64449	NA	-0.317435	NA	NA	0.273059	7	1	6
Atp5d	0.312394	-0.212755	1.33976	0.392462	1.42713	0.436089	NA	0.721265	0.779328	NA	NA	NA	7	1	6
Etfb	0.364504	-0.152815	1.53622	0.118111	1.70114	NA	3.45655	0.854713	NA	NA	NA	1.43409	7	1	6
Ndufb7	NA	-0.211543	1.62053	0.333245	1.98813	NA	3.80666	0.261521	0.984204	NA	NA	0.490824	7	1	6
Fxyd1	2.15283	NA	0.815539	NA	4.92859	0.747181	NA	2.45073	1.2963	NA	NA	NA	6	0	6
Atp1b1	2.03342	NA	NA	NA	1.74705	1.57821	NA	2.39232	NA	NA	0.246876	0.578744	6	0	6
Atp5o	0.503433	NA	1.17338	0.575781	NA	NA	NA	0.597854	0.74118	NA	NA	0.820473	6	0	6
Ndufb5	0.263301	NA	1.18528	0.257984	1.17109	NA	3.52143	0.39946	NA	NA	NA	NA	6	0	6
Tmem147	0.689727	0.210547	1.8774	NA	NA	0.944381	NA	0.965299	NA	NA	NA	0.577506	6	0	6
Cnpy2	0.440759	0.428812	NA	0.383391	NA	NA	NA	0.974405	0.781544	NA	NA	0.196814	6	0	6
Gadd45g	0.142223	0.837523	0.325529	0.313928	NA	0.652881	NA	NA	NA	NA	1.64407	NA	6	0	6
Fam173a	NA	0.293293	1.13539	NA	1.12922	0.298779	NA	0.734852	NA	NA	NA	0.670136	6	0	6
Atox1	-0.812529	-0.31508	1.17442	NA	0.487991	1.02371	0.812015	0.748434	NA	NA	0.996349	1.34104	7	2	5
Cox8a	0.414902	-0.499803	0.839618	0.323807	NA	0.312218	1.18883	0.682921	NA	NA	-0.34382	0.230485	7	2	5
Prdx5	0.983191	-0.177711	1.34018	0.412466	NA	0.369326	NA	1.29856	NA	NA	NA	1.28054	6	1	5
Mdh1	1.04506	-0.147756	0.889142	NA	2.35342	0.511837	2.25076	1.02665	NA	NA	NA	NA	6	1	5
Ctsz	0.35754	0.177801	NA	0.214671	NA	0.621828	NA	0.471279	0.942076	NA	-0.679878	NA	6	1	5
Ctsd	0.626189	-0.215877	1.69229	0.276687	NA	0.983864	NA	1.31049	NA	NA	NA	1.27215	6	1	5
Atp6v0b	0.140705	0.352491	0.39082	NA	0.166557	0.407046	NA	-0.193685	NA	5.82835	NA	NA	6	1	5
Hspa5	0.466005	-0.267556	0.684305	0.286709	0.70309	NA	NA	0.21237	NA	1.29019	NA	NA	6	1	5
Lrpap1	0.149141	-0.163249	1.19556	0.275027	0.859369	0.244682	NA	0.229583	NA	NA	NA	NA	6	1	5
Ralgapa1	0.141503	NA	-0.412422	NA	NA	0.157743	3.71692	0.191902	NA	NA	0.929745	0.398318	6	1	5
Cox5a	-0.202427	NA	1.21389	0.400583	NA	NA	3.64637	0.699277	0.84458	NA	NA	1.20594	6	1	5
Tmem208	0.303443	0.610129	NA	0.659907	-0.167401	0.178148	NA	0.184806	0.957889	NA	NA	NA	6	1	5
Cisd1	0.513046	NA	NA	0.452311	2.53776	0.925734	-2.44783	0.104216	NA	NA	NA	1.71749	6	1	5
Cox20	0.330455	-0.318435	0.485227	NA	0.325916	0.68044	NA	0.722903	1.27692	NA	NA	NA	6	1	5
Rnasek	NA	0.244886	1.14976	0.216594	1.24777	NA	NA	0.180649	NA	NA	-0.594395	0.671662	6	1	5
Rdh5	NA	-0.185439	1.68734	NA	3.22313	1.17242	4.04948	1.50092	NA	NA	NA	1.47579	6	1	5
Atp5h	NA	-0.234743	1.60073	0.162656	0.275869	NA	4.82861	0.531452	0.957749	NA	NA	NA	6	1	5
Atp5l	NA	-0.46675	NA	NA	0.20301	0.665585	1.38567	0.647226	0.637368	NA	NA	0.908479	6	1	5
Malat1	0.59684	1.74123	NA	NA	1.12478	0.143422	NA	NA	NA	NA	0.195831	NA	5	0	5
Tspan5	0.322821	NA	0.37624	NA	NA	0.211169	NA	NA	0.641828	NA	2.01966	NA	5	0	5
Dad1	0.371349	0.398892	0.943599	0.296722	NA	NA	NA	0.490063	NA	NA	NA	NA	5	0	5
Elovl7	0.100592	0.289946	NA	NA	NA	0.178681	NA	0.160181	NA	NA	2.27641	NA	5	0	5
Erbin	0.394363	0.119255	NA	NA	NA	NA	NA	NA	0.36802	NA	0.949175	0.106083	5	0	5
Ggh	0.689912	NA	NA	NA	NA	0.74999	3.25773	0.69859	0.734319	NA	NA	NA	5	0	5
Aig1	0.239487	0.20732	0.208751	NA	NA	NA	NA	0.111096	NA	NA	NA	0.100608	5	0	5
Ldlrad3	0.213805	NA	NA	NA	NA	0.152937	NA	0.102432	NA	NA	0.986412	0.170878	5	0	5
Pdia6	0.163785	NA	NA	0.319567	0.638078	0.173036	NA	0.374351	NA	NA	NA	NA	5	0	5
Rptor	0.633697	NA	NA	NA	NA	0.240413	NA	0.528972	NA	NA	0.742845	0.168229	5	0	5
Sil1	NA	0.156178	0.333596	NA	NA	0.46979	NA	0.256647	NA	NA	NA	0.216947	5	0	5
Mt3	1.63676	-0.756995	NA	-0.404199	3.54305	-1.72035	NA	1.83013	0.872859	2.10498	0.9689	2.8554	7	3	4
Clu	1.04951	-0.458931	NA	NA	2.56625	-0.83165	NA	1.74703	0.875161	NA	1.08894	2.52759	6	2	4
Tmem234	-0.420611	0.197853	0.245206	0.187443	0.443223	0.256407	NA	-0.366191	NA	NA	NA	0.217542	6	2	4
Ndufa1	0.492113	-0.678867	NA	-0.432109	0.902027	0.677831	4.13746	1.17591	NA	NA	NA	0.592261	6	2	4
Ly6c1	-0.995583	2.29295	1.28953	NA	NA	1.67958	NA	1.41072	NA	NA	4.44228	NA	5	1	4
Slc22a17	1.66871	-0.385317	NA	NA	1.79294	0.816123	NA	0.788763	NA	NA	1.79756	NA	5	1	4
Pebp1	0.578849	-0.374956	NA	0.620769	1.03323	NA	NA	0.174548	0.853385	NA	NA	NA	5	1	4
Pgrmc1	0.154216	0.275337	NA	0.240761	NA	0.359249	NA	0.810159	-0.338924	NA	NA	NA	5	1	4
Insr	0.424548	NA	-0.35473	NA	NA	0.359749	NA	0.431192	1.04898	NA	NA	0.461721	5	1	4
Tspo	-0.2255	0.265544	NA	0.372267	NA	NA	3.5846	NA	0.294526	NA	NA	1.52219	5	1	4
Magi1	0.66919	NA	0.115435	NA	NA	0.320251	-2.66234	0.114164	NA	NA	NA	0.749008	5	1	4
Lamp2	0.577967	-0.351033	0.352508	NA	0.631868	NA	NA	0.10835	NA	NA	NA	0.582237	5	1	4
Timp2	1.06851	0.163208	1.52018	0.232344	NA	-0.328199	NA	0.653557	NA	NA	NA	NA	5	1	4
Stk39	1.10424	-0.465252	0.602712	NA	NA	0.479703	NA	0.101057	0.550954	NA	NA	NA	5	1	4
Rnf169	0.35022	NA	0.121573	NA	NA	0.279689	NA	-0.146606	0.816961	NA	NA	0.376667	5	1	4
Hmg20a	0.146563	NA	0.278978	NA	NA	NA	3.31854	0.230997	0.819529	NA	NA	-0.632548	5	1	4
Ndufc1	NA	-0.53572	0.231092	NA	0.386615	NA	3.7938	0.511993	0.26498	NA	NA	NA	5	1	4
Ptprm	0.550683	NA	0.159469	NA	NA	0.23271	NA	NA	NA	NA	0.617876	NA	4	0	4
Atxn1	0.590988	NA	NA	NA	NA	NA	NA	0.446996	NA	NA	0.612203	0.142951	4	0	4
Dock1	0.405237	NA	NA	NA	NA	0.275184	NA	NA	NA	NA	0.691835	0.407708	4	0	4
Exoc6b	0.447389	NA	NA	NA	NA	0.19046	NA	NA	0.280423	NA	0.608622	NA	4	0	4
Adipor2	0.204501	NA	NA	NA	NA	0.16251	NA	0.274205	NA	NA	1.54041	NA	4	0	4
Myo1d	0.513468	NA	NA	NA	NA	0.689315	NA	0.12856	NA	NA	1.03793	NA	4	0	4
Syne1	0.309829	0.301495	NA	NA	NA	NA	NA	0.346915	NA	NA	0.441472	NA	4	0	4
Mef2a	0.234388	NA	NA	NA	NA	NA	NA	0.233306	NA	NA	0.85245	0.152736	4	0	4
Nebl	0.29958	NA	NA	NA	NA	0.184526	NA	NA	0.689342	NA	2.05072	NA	4	0	4
Pkp4	0.423952	NA	NA	NA	NA	0.314391	NA	0.217376	NA	NA	1.68222	NA	4	0	4
St6galnac3	0.612468	NA	NA	NA	NA	0.317937	NA	0.258264	NA	NA	2.71634	NA	4	0	4
Nme7	1.66831	0.475299	NA	NA	NA	0.430033	NA	NA	NA	NA	NA	0.371888	4	0	4
Npc2	0.421048	NA	NA	0.418863	NA	1.59931	NA	0.307538	NA	NA	NA	NA	4	0	4
Frmd4b	0.436239	NA	NA	NA	NA	0.23202	NA	0.186482	NA	NA	0.899332	NA	4	0	4
Pdlim5	0.1727	NA	NA	NA	NA	0.128141	NA	0.208315	0.158791	NA	NA	NA	4	0	4
Sgms2	0.127903	0.159216	NA	NA	NA	0.118056	NA	NA	NA	NA	2.03158	NA	4	0	4
Stim2	0.512669	NA	NA	NA	NA	0.58801	NA	0.426192	NA	NA	0.684901	NA	4	0	4
Mbnl1	0.169922	NA	NA	NA	1.26778	0.473882	NA	NA	NA	NA	NA	0.45351	4	0	4
H13	0.441897	0.108216	NA	NA	NA	0.529233	NA	0.845869	NA	NA	NA	NA	4	0	4
Tmem205	0.573084	0.479568	NA	0.5528	NA	NA	NA	0.631567	NA	NA	NA	NA	4	0	4
Usp53	0.236416	NA	NA	NA	NA	0.992878	NA	NA	NA	NA	1.20595	0.546268	4	0	4
Gse1	0.599054	NA	0.328217	NA	NA	NA	NA	0.197656	NA	NA	0.295918	NA	4	0	4
Ctsa	0.467291	NA	NA	NA	0.20703	0.200765	NA	0.11263	NA	NA	NA	NA	4	0	4
Irak2	0.326761	NA	NA	NA	NA	0.204664	0.267448	NA	NA	NA	1.31388	NA	4	0	4
Ptpn14	0.402509	NA	NA	0.150085	NA	0.301213	NA	NA	NA	NA	1.05766	NA	4	0	4
Btbd9	0.627201	NA	NA	NA	NA	0.24376	NA	0.70348	NA	NA	NA	0.210387	4	0	4
Nt5c2	0.173544	NA	NA	NA	NA	0.305193	NA	0.400897	NA	NA	NA	0.536872	4	0	4
Nf1	0.519602	NA	0.21642	NA	NA	0.134786	NA	0.173001	NA	NA	NA	NA	4	0	4
Fto	0.485984	NA	0.10095	NA	NA	0.165417	NA	0.356099	NA	NA	NA	NA	4	0	4
Ambra1	0.61388	NA	NA	NA	NA	0.306305	NA	0.111791	NA	NA	0.915419	NA	4	0	4
Abca1	0.503586	NA	0.24681	NA	NA	NA	NA	0.695104	NA	NA	NA	0.219272	4	0	4
Ankrd17	0.339046	NA	NA	NA	NA	0.148552	NA	0.19688	NA	NA	NA	0.27656	4	0	4
Kif13a	0.498172	NA	NA	NA	NA	0.28017	NA	NA	NA	NA	0.980486	0.158907	4	0	4
Nsmce2	0.548045	NA	NA	NA	NA	NA	NA	0.158763	1.11661	NA	NA	0.144692	4	0	4
Psme4	0.174206	NA	NA	NA	NA	0.16233	4.0849	0.353625	NA	NA	NA	NA	4	0	4
Tex264	0.101739	NA	NA	0.37728	NA	NA	NA	0.159557	NA	NA	NA	0.362211	4	0	4
Znrf3	0.662522	NA	NA	NA	NA	0.373502	4.04447	NA	NA	NA	NA	0.299124	4	0	4
Arhgef11	0.428483	NA	NA	NA	NA	0.484813	NA	0.106887	NA	NA	NA	0.363497	4	0	4
Gigyf2	0.298434	0.212076	NA	NA	NA	NA	NA	0.398477	NA	NA	NA	0.341335	4	0	4
Ext1	0.557331	NA	0.346971	NA	NA	0.229534	NA	0.395024	NA	NA	NA	NA	4	0	4
Tmem176b	0.146102	0.139442	1.33298	NA	NA	NA	NA	NA	NA	NA	NA	0.427094	4	0	4
Lrmda	0.492751	NA	0.240725	NA	NA	0.881884	NA	0.76111	NA	NA	NA	NA	4	0	4
Yipf1	NA	0.176169	NA	0.390104	NA	0.356641	NA	0.260504	NA	NA	NA	NA	4	0	4
Nfe2l1	NA	0.47206	0.162125	NA	NA	0.213634	NA	0.157537	NA	NA	NA	NA	4	0	4
Pcmtd1	NA	0.147265	NA	0.310125	NA	0.108349	NA	NA	NA	NA	0.978074	NA	4	0	4
Calr	NA	0.134008	0.864133	0.122288	NA	NA	NA	0.229905	NA	NA	NA	NA	4	0	4
Snx29	NA	NA	0.78713	NA	NA	0.213965	NA	0.50742	NA	NA	NA	0.106505	4	0	4
Ndfip1	NA	NA	NA	NA	1.76085	NA	2.18955	0.140823	NA	NA	NA	0.105293	4	0	4
Cadm2	NA	NA	NA	NA	NA	0.864858	NA	0.107453	0.636267	NA	NA	0.652249	4	0	4
Uqcr10	0.132434	-0.602066	1.11001	-0.13269	1.30308	NA	-0.12126	0.35772	1.07533	NA	NA	0.618532	6	3	3
Calml4	1.74073	-0.468044	1.6533	NA	0.789558	-0.412789	NA	2.01089	NA	NA	1.02687	NA	5	2	3
Atp5j	-0.396636	-0.396979	0.908046	0.219492	0.682329	NA	NA	0.509272	NA	NA	NA	0.685016	5	2	3
Ppib	-0.249397	0.298134	NA	0.239173	0.739102	NA	NA	0.210224	NA	2.55483	-0.61385	NA	5	2	3
Ctsl	0.174231	-0.15249	0.725645	0.478741	NA	0.568389	NA	0.849035	NA	NA	NA	-0.655245	5	2	3
Rabac1	NA	0.39031	0.823639	0.367036	NA	NA	4.24133	0.192297	-0.455264	NA	-0.388456	NA	5	2	3
Uqcr11	NA	-0.494481	0.675531	NA	1.20689	NA	1.13344	0.60478	NA	NA	-0.218876	1.26024	5	2	3
Myl6	-0.584816	NA	1.80062	0.277676	1.20772	NA	NA	0.596347	NA	NA	NA	NA	4	1	3
Foxp1	0.363594	NA	NA	NA	NA	0.296548	-1.26107	0.24241	0.432607	NA	NA	NA	4	1	3
Ppp3ca	0.357926	NA	NA	NA	NA	0.128519	NA	0.134586	NA	NA	0.849342	-0.230524	4	1	3
Heg1	0.350492	NA	NA	NA	NA	-0.168147	NA	0.385037	0.687417	NA	1.1881	NA	4	1	3
Trpm3	2.21278	-0.240537	NA	NA	NA	0.672723	NA	2.4177	NA	NA	NA	0.994271	4	1	3
Grcc10	-0.290632	NA	1.54215	NA	NA	NA	NA	0.4322	0.873013	5.51116	NA	NA	4	1	3
Gnaq	0.416244	NA	NA	NA	NA	0.19218	NA	0.200789	0.594259	NA	NA	-0.317595	4	1	3
Kl	1.42362	-0.950222	NA	NA	2.47951	1.54473	NA	1.59105	NA	NA	NA	NA	4	1	3
Glrx3	0.32041	-0.278693	NA	NA	NA	0.503923	NA	0.427179	NA	NA	NA	0.512536	4	1	3
Uqcrq	0.11591	-0.381588	1.83052	NA	0.58058	NA	NA	0.539728	NA	NA	NA	NA	4	1	3
Tusc3	0.680142	-0.335828	NA	NA	0.997797	NA	NA	NA	0.802343	NA	NA	0.359852	4	1	3
Igf1r	0.170079	NA	-0.134481	NA	NA	0.152251	NA	0.301441	NA	NA	1.03739	NA	4	1	3
Snd1	0.635671	NA	-0.283421	NA	NA	0.124604	NA	0.25524	NA	NA	NA	0.122435	4	1	3
Arih1	0.229804	NA	-0.285403	NA	NA	0.106818	NA	0.140029	NA	NA	NA	0.176155	4	1	3
Cab39l	0.854838	-0.596283	NA	NA	NA	0.287849	NA	0.268315	NA	NA	NA	0.393736	4	1	3
Mrpl57	0.225875	-0.138619	NA	0.229742	0.459425	NA	NA	0.128332	NA	NA	NA	NA	4	1	3
Aftph	0.2409	NA	NA	0.43013	-2.07106	0.310855	NA	NA	NA	NA	NA	0.437597	4	1	3
Tmem237	0.722498	-0.236289	NA	NA	NA	0.218519	NA	0.90387	NA	NA	NA	0.402615	4	1	3
Maged1	0.354148	NA	NA	0.300415	NA	0.365299	NA	0.279479	-0.418586	NA	NA	NA	4	1	3
Ahcyl2	0.617438	-0.626389	NA	0.1065	NA	0.270826	NA	0.203534	NA	NA	NA	NA	4	1	3
Fars2	0.714479	-0.540415	NA	NA	NA	0.182219	NA	0.405382	NA	NA	NA	0.601205	4	1	3
Mnat1	0.188916	NA	NA	-0.441533	NA	0.242565	NA	NA	0.970305	NA	NA	0.490007	4	1	3
Fam49b	0.444321	NA	NA	NA	NA	0.278226	-1.32652	0.122677	0.883089	NA	NA	NA	4	1	3
Ubac2	0.242581	NA	0.634594	NA	NA	-0.54617	3.34907	0.308095	NA	NA	NA	NA	4	1	3
Ddt	NA	0.153178	NA	0.224263	NA	-0.312677	NA	0.263603	1.75349	NA	NA	NA	4	1	3
Dnajc3	NA	0.235111	0.235372	0.222972	NA	NA	NA	-0.204783	NA	NA	NA	0.329643	4	1	3
Kif5b	NA	-0.178401	NA	0.241187	0.240485	NA	NA	0.143302	NA	NA	0.227673	NA	4	1	3
Sptbn1	NA	1.82243	-0.134651	0.217389	NA	NA	NA	0.147079	NA	NA	0.666512	NA	4	1	3
Uqcrh	NA	-0.129951	0.719334	NA	NA	0.215152	NA	0.751787	1.03838	NA	NA	NA	4	1	3
Tmem131	NA	NA	0.45079	NA	-2.69363	0.147645	3.15792	0.390519	NA	NA	NA	NA	4	1	3
Dock4	0.759707	NA	NA	NA	NA	NA	NA	0.502875	NA	NA	2.48011	NA	3	0	3
Utrn	0.306193	NA	NA	NA	NA	NA	3.46203	NA	NA	NA	0.456238	NA	3	0	3
Xist	0.533806	NA	NA	NA	NA	0.275878	NA	0.166885	NA	NA	NA	NA	3	0	3
Akap13	0.478175	NA	NA	NA	0.929913	0.12599	NA	NA	NA	NA	NA	NA	3	0	3
Tcf12	0.459881	NA	NA	NA	NA	0.16701	NA	0.104112	NA	NA	NA	NA	3	0	3
Tmtc2	0.471885	NA	NA	NA	NA	NA	NA	0.159949	NA	NA	3.68773	NA	3	0	3
Maml2	0.743556	NA	NA	NA	NA	0.132376	NA	0.718365	NA	NA	NA	NA	3	0	3
Asap1	0.291475	NA	NA	NA	NA	0.293257	NA	0.464813	NA	NA	NA	NA	3	0	3
Akt3	0.581847	NA	NA	NA	NA	0.21819	NA	NA	NA	NA	NA	0.151335	3	0	3
Fry	0.32176	NA	NA	NA	NA	NA	NA	0.263305	NA	NA	0.670096	NA	3	0	3
Dnm3	0.45594	NA	NA	NA	NA	NA	NA	0.152123	NA	NA	2.19649	NA	3	0	3
Znrf1	0.294691	NA	NA	NA	NA	NA	NA	0.119185	NA	NA	1.10049	NA	3	0	3
Lef1	0.140745	NA	NA	NA	NA	NA	NA	NA	NA	NA	1.9029	1.29236	3	0	3
Tnrc6c	0.314219	NA	NA	NA	NA	NA	NA	0.151333	NA	NA	NA	0.198199	3	0	3
Sash1	0.262973	NA	NA	NA	NA	NA	5.15127	NA	NA	NA	NA	0.320908	3	0	3
Sbf2	0.390242	NA	NA	NA	NA	0.466615	NA	0.199774	NA	NA	NA	NA	3	0	3
Hint2	0.266965	NA	NA	NA	NA	0.139205	NA	NA	NA	NA	NA	1.56873	3	0	3
Cacna1a	0.57557	NA	NA	NA	NA	NA	NA	0.341442	NA	NA	1.4775	NA	3	0	3
Lrrc4	0.97459	NA	NA	NA	NA	NA	NA	0.158462	1.67328	NA	NA	NA	3	0	3
Dennd1a	0.712812	NA	NA	NA	NA	0.431355	NA	0.343641	NA	NA	NA	NA	3	0	3
Dip2c	0.669151	NA	NA	NA	NA	0.620183	NA	0.209376	NA	NA	NA	NA	3	0	3
Pam16	0.328763	NA	NA	NA	NA	0.36231	NA	0.107368	NA	NA	NA	NA	3	0	3
Mbd5	0.539237	NA	0.109649	NA	NA	0.108091	NA	NA	NA	NA	NA	NA	3	0	3
Frmd5	0.768676	NA	NA	NA	NA	0.292437	NA	0.226201	NA	NA	NA	NA	3	0	3
Kmt2c	0.288726	NA	NA	NA	NA	0.135063	NA	NA	NA	NA	NA	0.301129	3	0	3
Vps13d	0.54381	NA	NA	0.219424	NA	NA	NA	0.392824	NA	NA	NA	NA	3	0	3
Camk2d	0.471333	NA	NA	NA	NA	0.451241	NA	NA	NA	NA	0.5003	NA	3	0	3
Arl15	0.739598	NA	0.118833	NA	NA	NA	NA	NA	NA	NA	0.995256	NA	3	0	3
Uvrag	0.314761	NA	NA	NA	NA	NA	NA	0.151877	NA	NA	NA	0.303379	3	0	3
Fbxo11	0.226832	NA	NA	NA	NA	0.326039	NA	0.26131	NA	NA	NA	NA	3	0	3
Cadm1	0.683389	NA	NA	NA	NA	0.207182	NA	0.285684	NA	NA	NA	NA	3	0	3
Herc1	0.344	NA	NA	NA	NA	0.278507	NA	NA	NA	NA	NA	0.10028	3	0	3
Ubr5	0.231959	NA	NA	NA	NA	0.441593	NA	NA	NA	NA	NA	0.453265	3	0	3
Cd164	0.132132	0.121129	NA	NA	NA	NA	NA	0.790157	NA	NA	NA	NA	3	0	3
Ubr3	0.456145	NA	NA	0.12564	NA	0.434285	NA	NA	NA	NA	NA	NA	3	0	3
Ptprj	0.389366	NA	NA	NA	NA	NA	NA	0.716822	NA	NA	2.94736	NA	3	0	3
Zfp407	0.76446	NA	NA	NA	NA	NA	NA	0.317853	NA	NA	0.6607	NA	3	0	3
Lncpint	0.554614	NA	NA	NA	NA	0.204135	NA	0.406602	NA	NA	NA	NA	3	0	3
Nr3c2	0.556589	NA	NA	NA	NA	0.319495	NA	NA	1.09866	NA	NA	NA	3	0	3
Ssh2	0.602892	NA	1.10492	NA	NA	NA	NA	0.234702	NA	NA	NA	NA	3	0	3
Csgalnact1	0.463042	NA	NA	NA	NA	0.528289	NA	NA	NA	NA	1.84493	NA	3	0	3
Ncoa1	0.400631	NA	NA	NA	NA	0.295801	NA	0.103235	NA	NA	NA	NA	3	0	3
Lpp	0.357605	NA	NA	NA	NA	0.25344	NA	NA	NA	NA	NA	0.30276	3	0	3
Exoc2	0.281298	NA	NA	NA	NA	0.294384	NA	0.198609	NA	NA	NA	NA	3	0	3
Gmds	0.487327	NA	NA	NA	NA	NA	NA	0.315893	0.88288	NA	NA	NA	3	0	3
Prkg1	0.558077	NA	NA	NA	NA	0.63427	NA	NA	0.699249	NA	NA	NA	3	0	3
Nedd9	0.428613	NA	NA	NA	NA	NA	3.74558	NA	NA	NA	3.17917	NA	3	0	3
Ophn1	0.59168	NA	0.323379	NA	NA	NA	NA	NA	NA	NA	1.33763	NA	3	0	3
Arid2	0.435886	NA	NA	NA	NA	0.238566	NA	0.235857	NA	NA	NA	NA	3	0	3
Hdac9	0.521838	NA	NA	NA	NA	NA	NA	NA	NA	NA	1.25104	1.19809	3	0	3
Btaf1	0.432107	NA	NA	NA	NA	0.434434	NA	0.345556	NA	NA	NA	NA	3	0	3
Srgap1	0.486205	NA	0.551484	NA	NA	NA	NA	0.222059	NA	NA	NA	NA	3	0	3
Nfkb1	0.38979	NA	NA	NA	NA	0.581087	NA	0.339316	NA	NA	NA	NA	3	0	3
Ldlrad4	0.78479	NA	0.430242	NA	NA	NA	NA	0.146276	NA	NA	NA	NA	3	0	3
Spred2	0.226523	NA	0.351938	NA	NA	NA	NA	NA	NA	NA	NA	0.202956	3	0	3
Zfp266	0.337108	NA	0.430542	NA	NA	NA	NA	NA	NA	NA	NA	0.408945	3	0	3
Arhgap17	0.421397	NA	0.243832	NA	NA	NA	NA	0.293983	NA	NA	NA	NA	3	0	3
Chka	0.555503	NA	NA	NA	NA	0.837867	NA	0.148541	NA	NA	NA	NA	3	0	3
Prickle1	0.110309	NA	NA	0.441285	NA	NA	NA	0.152791	NA	NA	NA	NA	3	0	3
Aff1	0.133475	NA	NA	NA	NA	0.265961	NA	0.348509	NA	NA	NA	NA	3	0	3
Cdc42se2	0.161811	NA	NA	NA	NA	0.196586	NA	NA	NA	NA	NA	0.180378	3	0	3
Fam117b	0.166459	NA	NA	NA	NA	NA	NA	0.219127	NA	NA	2.04439	NA	3	0	3
Kif13b	0.275205	NA	NA	NA	NA	0.608344	NA	NA	NA	NA	NA	0.38983	3	0	3
Etl4	0.381721	NA	NA	NA	NA	NA	NA	NA	1.76256	NA	3.20246	NA	3	0	3
Vps13b	0.412007	NA	0.170359	NA	NA	NA	NA	NA	NA	NA	NA	0.223467	3	0	3
Ltc4s	0.916808	0.434245	NA	0.323822	NA	NA	NA	NA	NA	NA	NA	NA	3	0	3
Smchd1	0.235246	NA	NA	NA	NA	0.138194	NA	0.432044	NA	NA	NA	NA	3	0	3
Cdkal1	0.554123	NA	NA	NA	NA	0.178745	NA	NA	NA	NA	NA	0.334505	3	0	3
Bach2	0.439233	NA	NA	NA	NA	0.270075	NA	0.345922	NA	NA	NA	NA	3	0	3
Trps1	0.277387	NA	NA	NA	NA	NA	2.54422	0.382013	NA	NA	NA	NA	3	0	3
Clasp1	0.256884	NA	NA	NA	NA	0.16501	NA	NA	NA	NA	NA	0.639121	3	0	3
Thada	0.776776	NA	NA	NA	NA	NA	NA	0.251521	NA	NA	NA	0.160767	3	0	3
Gpatch8	0.143512	NA	NA	NA	NA	0.213374	NA	0.137957	NA	NA	NA	NA	3	0	3
Zswim6	0.483819	NA	NA	NA	NA	NA	NA	0.303638	0.924024	NA	NA	NA	3	0	3
Dennd1b	0.517639	NA	NA	NA	NA	0.324539	NA	NA	NA	NA	NA	0.343682	3	0	3
Kcnq1ot1	0.448296	NA	0.209598	NA	NA	NA	NA	0.112776	NA	NA	NA	NA	3	0	3
Rreb1	0.4304	NA	NA	NA	NA	0.326264	NA	NA	NA	NA	NA	0.272398	3	0	3
Eml6	0.467557	NA	NA	NA	NA	0.728392	NA	0.158786	NA	NA	NA	NA	3	0	3
Coro2b	0.198655	NA	NA	NA	NA	0.180476	NA	0.294546	NA	NA	NA	NA	3	0	3
Ago3	0.318586	NA	NA	NA	NA	0.169207	NA	NA	NA	NA	NA	0.144693	3	0	3
Rbm33	0.127744	NA	NA	NA	NA	NA	NA	0.143409	NA	NA	NA	0.206531	3	0	3
Gtdc1	0.516333	NA	NA	NA	NA	NA	NA	0.103192	NA	NA	NA	0.301907	3	0	3
Usp24	0.173762	NA	NA	NA	NA	0.1592	NA	0.357143	NA	NA	NA	NA	3	0	3
Asxl2	0.10953	NA	0.144846	NA	NA	0.306666	NA	NA	NA	NA	NA	NA	3	0	3
Cep112	0.152151	NA	NA	NA	NA	0.298424	NA	NA	NA	NA	NA	0.228879	3	0	3
Acot13	NA	0.136785	NA	NA	NA	0.134712	NA	0.233278	NA	NA	NA	NA	3	0	3
Slc24a5	NA	0.23098	NA	0.495269	NA	NA	NA	0.124428	NA	NA	NA	NA	3	0	3
Slco1a4	NA	0.616041	NA	0.524433	NA	NA	NA	NA	NA	NA	6.40716	NA	3	0	3
Hexa	NA	0.284198	NA	0.60772	NA	NA	NA	0.288814	NA	NA	NA	NA	3	0	3
Cgnl1	NA	1.17472	NA	NA	NA	NA	NA	NA	NA	NA	0.676438	0.748984	3	0	3
Tmem59	NA	NA	0.983496	0.264849	NA	NA	NA	0.153864	NA	NA	NA	NA	3	0	3
Klf7	NA	NA	0.234449	NA	NA	NA	3.36723	0.205633	NA	NA	NA	NA	3	0	3
Itgb5	NA	NA	0.513375	0.198394	NA	NA	NA	0.672864	NA	NA	NA	NA	3	0	3
Frs2	NA	NA	0.422304	NA	NA	NA	NA	0.192289	NA	NA	NA	0.370915	3	0	3
6430590A07Rik	NA	NA	0.578189	0.624646	NA	NA	NA	0.128873	NA	NA	NA	NA	3	0	3
Ndufb9	NA	NA	0.458042	0.404137	NA	NA	3.8609	NA	NA	NA	NA	NA	3	0	3
Adgrb3	NA	NA	0.201831	NA	NA	0.260557	NA	0.219743	NA	NA	NA	NA	3	0	3
Clip1	NA	NA	0.591303	NA	NA	0.205407	NA	NA	NA	NA	NA	0.481276	3	0	3
Ndufs5	NA	NA	NA	NA	1.99458	NA	NA	0.157361	NA	NA	NA	1.0386	3	0	3
Scamp1	NA	NA	NA	NA	NA	0.17884	NA	0.254993	NA	NA	NA	0.701846	3	0	3
Atp6v0c	NA	NA	NA	NA	NA	0.875275	2.81968	0.161393	NA	NA	NA	NA	3	0	3
Naaladl2	NA	NA	NA	NA	NA	0.468156	NA	0.151683	NA	NA	NA	0.300018	3	0	3
Purg	NA	NA	NA	NA	NA	0.10449	NA	0.187574	0.367264	NA	NA	NA	3	0	3
Tnik	NA	NA	NA	NA	NA	NA	NA	0.134117	NA	NA	0.484848	0.210321	3	0	3
Sod2	0.381158	-0.156923	0.498749	0.455189	0.300622	-0.410243	NA	0.34569	NA	NA	NA	-0.564918	5	3	2
Cmss1	-0.261086	0.861438	0.497004	-1.27926	1.25413	-0.3655	3.92517	0.901557	NA	NA	NA	NA	5	3	2
Slc2a1	-0.563622	1.02616	NA	0.273339	NA	-0.567106	NA	0.103058	NA	NA	4.5604	NA	4	2	2
Rpl7	-0.482773	0.129298	0.994513	0.331173	-1.29062	NA	4.91983	NA	NA	NA	NA	NA	4	2	2
Ndufa6	-0.39919	-0.281722	NA	NA	0.249039	NA	NA	0.329296	0.832557	NA	NA	0.846632	4	2	2
Ssr4	-0.121728	0.55547	1.18699	NA	-0.174619	0.250037	NA	0.618667	NA	NA	NA	NA	4	2	2
Ndufb10	0.146909	-0.132921	NA	0.299568	NA	NA	NA	0.334274	0.628639	NA	-0.471442	NA	4	2	2
Mrpl20	0.268598	0.14486	NA	NA	0.429329	0.318275	NA	-0.175129	-0.248723	NA	NA	NA	4	2	2
Gde1	0.4424	NA	NA	NA	2.3686	0.295429	NA	-0.19186	-0.550962	NA	0.693554	NA	4	2	2
Cyfip1	-0.100194	0.217395	NA	NA	NA	0.278923	NA	0.403423	NA	NA	1.56291	-0.117009	4	2	2
Hsp90aa1	0.360955	NA	1.19071	0.2223	1.12019	-0.957602	NA	-0.731007	NA	NA	NA	NA	4	2	2
Uqcrb	-0.338471	-0.266651	1.0463	0.187178	1.1012	NA	NA	0.645641	NA	NA	NA	NA	4	2	2
Rapgef1	0.250134	NA	0.309571	-0.130032	NA	-0.130797	NA	0.100599	NA	NA	NA	0.490839	4	2	2
Tmed3	0.129172	-0.101031	NA	0.499613	0.386842	-0.243252	NA	0.594783	NA	NA	NA	NA	4	2	2
Etfa	0.41497	-0.394371	0.849927	NA	NA	-0.324439	NA	1.0031	NA	NA	NA	0.313656	4	2	2
Tra2a	0.20486	0.13831	-0.251199	NA	NA	0.352708	NA	0.159302	NA	NA	NA	-0.170508	4	2	2
Selenos	0.891097	0.197686	1.10653	NA	NA	0.182427	NA	-0.138233	NA	NA	-0.771846	NA	4	2	2
Lrba	0.324226	NA	-0.120843	NA	NA	0.322639	-1.8883	0.180372	NA	NA	NA	0.514941	4	2	2
Exoc3	0.269202	0.195812	NA	0.415688	NA	0.133185	NA	-0.350943	-0.916709	NA	NA	NA	4	2	2
4932438A13Rik	0.257745	NA	0.416577	0.117289	NA	-0.364606	-1.2149	NA	NA	NA	NA	0.582862	4	2	2
Nbea	0.379071	NA	-0.229216	NA	NA	0.225986	-3.07934	0.217297	NA	NA	0.424038	NA	4	2	2
Mia	NA	0.798806	NA	-0.139989	4.63516	-0.872195	NA	NA	1.45043	NA	NA	1.87369	4	2	2
Ndufb2	NA	-0.391139	NA	-0.374684	NA	0.320544	NA	0.356742	NA	5.53598	NA	1.53917	4	2	2
Tubb4b	NA	-0.131814	1.42986	0.248076	NA	-0.581135	3.94869	0.626995	NA	NA	NA	NA	4	2	2
Atp5md	NA	-0.930593	NA	-0.481663	1.64204	NA	3.89577	0.649761	NA	0.803778	NA	NA	4	2	2
Ptprg	0.710053	NA	NA	NA	NA	0.223123	NA	NA	NA	NA	1.87384	-0.293683	3	1	2
Exoc4	0.751749	-0.668966	NA	NA	NA	0.159463	NA	0.229289	NA	NA	NA	NA	3	1	2
Plcb4	0.437143	NA	-0.319632	NA	NA	NA	NA	NA	0.482661	NA	0.932087	NA	3	1	2
Col9a3	1.94725	-0.268535	NA	NA	NA	1.33392	NA	1.66848	NA	NA	NA	NA	3	1	2
Rapgef2	0.521013	NA	NA	NA	NA	-0.19932	NA	0.238976	NA	NA	1.03183	NA	3	1	2
Sorbs1	0.447507	NA	NA	NA	NA	NA	NA	NA	0.760586	NA	0.776846	-0.287843	3	1	2
Rbfox2	0.480167	NA	-0.249994	NA	NA	NA	NA	0.223231	NA	NA	0.953745	NA	3	1	2
Rasal2	0.353453	NA	-0.105649	NA	NA	NA	NA	0.152099	NA	NA	1.08384	NA	3	1	2
Fbxl17	0.69698	NA	NA	NA	NA	0.433923	-0.696727	0.258429	NA	NA	NA	NA	3	1	2
Mrtfb	0.239733	NA	NA	NA	NA	NA	NA	0.238778	NA	NA	1.38995	-0.453143	3	1	2
Cdk17	0.460886	NA	-0.337473	NA	NA	NA	NA	0.416246	NA	NA	1.2318	NA	3	1	2
Pls3	-0.24814	0.228009	NA	NA	NA	NA	NA	0.137892	0.747182	NA	NA	NA	3	1	2
Pard3	0.498748	NA	-0.22892	NA	NA	NA	NA	0.233583	NA	NA	0.643972	NA	3	1	2
Mycbp2	0.437884	NA	NA	NA	0.82787	0.302748	-1.146	NA	NA	NA	NA	NA	3	1	2
Ndufb6	0.268139	-0.406697	NA	NA	NA	NA	NA	0.315027	1.51535	NA	NA	NA	3	1	2
Dock9	0.34118	NA	-0.415602	NA	NA	NA	NA	0.264683	NA	NA	1.20262	NA	3	1	2
Picalm	0.112024	NA	NA	NA	NA	0.371889	NA	NA	-0.479091	NA	NA	0.140218	3	1	2
Ifnar2	-0.360795	0.38612	NA	NA	0.717356	NA	NA	0.474117	NA	NA	NA	NA	3	1	2
Aco2	0.105952	-0.342237	0.319074	NA	NA	0.213201	NA	NA	NA	NA	NA	NA	3	1	2
Sdhc	0.187924	-0.187193	NA	NA	NA	0.354057	NA	0.131568	NA	NA	NA	NA	3	1	2
Nbeal1	0.213623	-0.357796	NA	NA	NA	0.204013	NA	0.125009	NA	NA	NA	NA	3	1	2
Gpcpd1	0.236093	NA	NA	NA	NA	0.119485	NA	NA	NA	NA	0.988681	-0.767612	3	1	2
Phf14	0.141334	NA	NA	NA	NA	0.147378	-0.381518	0.248881	NA	NA	NA	NA	3	1	2
Sod1	-0.205785	0.175039	NA	0.406454	NA	NA	NA	0.492472	NA	NA	NA	NA	3	1	2
Id1	-0.382322	0.82663	NA	0.398717	NA	NA	NA	NA	NA	NA	2.30465	NA	3	1	2
Bcas3	0.625124	NA	-0.446601	NA	NA	NA	NA	0.202895	NA	NA	NA	0.308618	3	1	2
Tjp1	0.165263	NA	NA	NA	NA	0.114143	NA	-0.246573	NA	NA	NA	0.307499	3	1	2
Tspan3	0.692462	-0.426472	NA	NA	1.44657	NA	NA	0.124669	NA	NA	NA	NA	3	1	2
Mif	0.437098	-0.321813	1.01954	NA	NA	NA	NA	0.199786	NA	NA	NA	NA	3	1	2
Mllt3	0.638827	NA	-0.107431	NA	NA	0.193956	NA	NA	NA	NA	NA	0.379928	3	1	2
Phf21a	0.515917	NA	NA	NA	NA	NA	-1.29321	0.153341	NA	NA	NA	0.112634	3	1	2
Pcnx	0.365726	-0.569418	NA	NA	NA	NA	NA	0.457702	NA	NA	1.47282	NA	3	1	2
Usp9x	0.243959	NA	0.339742	NA	NA	NA	NA	-0.109087	NA	NA	NA	0.191379	3	1	2
Eml1	0.340295	NA	NA	NA	NA	-0.30943	NA	0.181585	NA	NA	0.943761	NA	3	1	2
Itpr1	0.629085	-0.586957	NA	NA	NA	0.144682	NA	NA	NA	NA	NA	0.720057	3	1	2
Arid1b	0.565603	NA	NA	NA	NA	0.291583	NA	0.196999	NA	NA	NA	-0.100747	3	1	2
Sh3d19	0.671075	-0.574716	NA	0.142682	NA	NA	NA	0.115327	NA	NA	NA	NA	3	1	2
Mpp5	0.395935	NA	NA	NA	-2.15104	0.171257	NA	NA	NA	NA	NA	1.03053	3	1	2
Tecr	0.423583	NA	0.181259	NA	NA	NA	NA	-0.381235	NA	NA	NA	0.268655	3	1	2
Tbc1d5	0.582762	NA	NA	NA	NA	0.207838	NA	0.19014	NA	NA	NA	-0.160187	3	1	2
Ncoa2	0.594332	NA	NA	NA	NA	0.158036	-0.581456	0.285746	NA	NA	NA	NA	3	1	2
Gulp1	0.491851	NA	NA	NA	NA	0.126562	NA	NA	NA	NA	0.730297	-0.701616	3	1	2
Mtss1	0.145918	NA	NA	-0.300271	NA	0.182177	NA	0.276283	NA	NA	NA	NA	3	1	2
Tmem223	0.120324	0.120793	NA	NA	NA	0.598894	NA	-0.238671	NA	NA	NA	NA	3	1	2
Kdm4c	0.33473	NA	-0.181893	NA	NA	0.107363	NA	0.275599	NA	NA	NA	NA	3	1	2
Xrn2	0.255777	-0.430418	NA	NA	NA	0.202909	NA	NA	NA	NA	NA	0.422938	3	1	2
Cep85l	0.344293	NA	0.234524	NA	NA	-0.632166	NA	0.276352	NA	NA	NA	NA	3	1	2
Nav2	0.644416	NA	NA	NA	NA	0.317603	-1.78323	0.513904	NA	NA	NA	NA	3	1	2
Spg7	-0.174723	0.27693	0.195589	NA	NA	0.119021	NA	NA	NA	NA	NA	NA	3	1	2
Zfp292	0.230741	NA	NA	NA	NA	-0.372744	NA	0.146181	NA	NA	NA	0.214125	3	1	2
Prdx4	0.113254	0.416686	NA	NA	NA	-0.371781	NA	0.231249	NA	NA	NA	NA	3	1	2
Ankrd28	0.638001	NA	-0.421289	NA	NA	NA	NA	0.115759	NA	NA	0.963996	NA	3	1	2
Phlpp1	0.542567	NA	NA	NA	NA	0.342759	NA	NA	-1.93042	NA	NA	0.395292	3	1	2
Tspan9	0.452301	NA	-0.33673	NA	NA	0.665468	NA	0.500455	NA	NA	NA	NA	3	1	2
Cnot4	0.261911	NA	-0.258586	NA	NA	NA	NA	0.177393	NA	NA	NA	0.202042	3	1	2
Celf2	0.597091	NA	-0.414559	NA	NA	0.902187	NA	NA	0.757247	NA	NA	NA	3	1	2
Creb1	0.12652	NA	NA	NA	NA	0.381639	NA	-0.215702	NA	NA	0.791141	NA	3	1	2
Rab3gap1	0.251012	-0.308782	NA	NA	NA	0.545319	NA	0.180451	NA	NA	NA	NA	3	1	2
Plekha5	0.590818	NA	-0.43949	NA	NA	0.209339	NA	0.175144	NA	NA	NA	NA	3	1	2
Fam193a	0.302412	NA	NA	NA	NA	0.110255	NA	-0.115058	NA	NA	NA	0.179333	3	1	2
Ube2e2	0.601189	NA	-0.51001	NA	NA	NA	NA	0.104052	0.361553	NA	NA	NA	3	1	2
Erlec1	0.451428	-0.159691	NA	NA	NA	NA	NA	0.19728	NA	NA	NA	0.20759	3	1	2
Larp4b	0.135969	NA	NA	NA	-0.608647	0.253317	NA	0.156395	NA	NA	NA	NA	3	1	2
Klhdc10	0.450277	NA	0.206634	NA	NA	-0.148038	NA	0.126194	NA	NA	NA	NA	3	1	2
Mib1	0.176097	NA	-0.435854	NA	NA	0.205563	NA	0.212186	NA	NA	NA	NA	3	1	2
Avl9	0.319092	NA	NA	NA	NA	0.169136	-1.89542	0.114693	NA	NA	NA	NA	3	1	2
Rnf38	0.347282	NA	0.14269	NA	NA	-0.528774	NA	0.303052	NA	NA	NA	NA	3	1	2
Thap3	0.165335	NA	-0.367885	NA	NA	0.156788	NA	0.127157	NA	NA	NA	NA	3	1	2
Rb1	0.32332	NA	-0.537175	NA	NA	NA	NA	0.235237	NA	NA	NA	0.259587	3	1	2
Arnt	0.118911	NA	-0.305129	NA	NA	0.616822	NA	0.15934	NA	NA	NA	NA	3	1	2
Acaa2	0.471333	-0.109649	NA	0.321493	NA	0.928161	NA	NA	NA	NA	NA	NA	3	1	2
Naa15	0.472723	NA	NA	NA	NA	-0.105971	NA	0.114146	NA	NA	NA	0.210291	3	1	2
Rassf8	0.555694	NA	-0.530978	NA	NA	0.123845	NA	0.278621	NA	NA	NA	NA	3	1	2
Fam13b	0.583068	NA	-0.311023	NA	NA	0.222463	NA	0.315369	NA	NA	NA	NA	3	1	2
Cstf3	0.537244	NA	-0.275502	NA	NA	0.77046	NA	NA	NA	NA	NA	0.311684	3	1	2
Acadsb	0.27192	-0.523959	NA	NA	NA	0.182168	NA	0.108532	NA	NA	NA	NA	3	1	2
Scaf4	0.172802	NA	NA	NA	NA	0.224733	NA	0.406792	NA	NA	NA	-0.860118	3	1	2
Cspp1	0.555142	NA	-0.367727	NA	NA	NA	NA	0.188189	NA	NA	NA	0.594224	3	1	2
Cradd	0.399701	NA	NA	NA	NA	0.310045	NA	0.188866	NA	NA	NA	-0.521343	3	1	2
Dicer1	0.364734	NA	NA	NA	NA	-0.212041	NA	NA	NA	NA	0.577249	0.432067	3	1	2
Zdhhc20	0.193018	NA	NA	NA	NA	0.333038	NA	NA	-1.57726	NA	1.39912	NA	3	1	2
Hdac8	0.482197	NA	NA	NA	NA	0.387998	NA	0.2054	NA	NA	NA	-0.342922	3	1	2
Slco1c1	-0.118574	NA	NA	NA	2.04256	NA	NA	NA	0.619129	NA	4.57117	NA	3	1	2
Eps15l1	0.288715	NA	NA	NA	NA	0.142581	NA	0.174663	NA	NA	NA	-0.580544	3	1	2
Senp7	0.250193	NA	-0.239397	NA	NA	NA	NA	0.167342	NA	NA	NA	0.351313	3	1	2
Dstyk	0.20795	NA	NA	NA	NA	0.287172	NA	-0.512208	NA	NA	NA	0.116068	3	1	2
Chd2	0.242985	NA	NA	NA	NA	0.254918	-1.4891	0.115396	NA	NA	NA	NA	3	1	2
Dnajc13	0.105681	NA	NA	NA	NA	0.267126	-1.8761	0.211589	NA	NA	NA	NA	3	1	2
Limk2	0.158323	NA	NA	NA	NA	0.275882	NA	0.116041	NA	NA	NA	-0.971613	3	1	2
Sh3bgrl	NA	-0.379468	NA	NA	NA	0.291452	3.52847	0.520494	NA	NA	NA	NA	3	1	2
Ndufb8	NA	-0.125972	NA	0.265014	0.910978	NA	3.33769	NA	NA	NA	NA	NA	3	1	2
Dnajb11	NA	0.315692	NA	0.293273	NA	0.328763	NA	-0.253864	NA	NA	NA	NA	3	1	2
Hexb	NA	0.971727	0.998218	-0.995626	NA	NA	NA	1.70934	NA	NA	NA	NA	3	1	2
Sec62	NA	0.342402	NA	0.263522	1.01432	NA	NA	-0.526011	NA	NA	NA	NA	3	1	2
Slc23a2	NA	-0.620425	NA	NA	NA	0.109545	NA	0.205143	NA	NA	NA	0.134093	3	1	2
Slc25a5	NA	-0.304843	NA	0.325271	0.837688	NA	NA	0.576449	NA	NA	NA	NA	3	1	2
Cd81	NA	0.179711	NA	0.260757	NA	NA	NA	-0.619546	NA	2.26567	NA	NA	3	1	2
Golgb1	NA	0.880676	0.125133	NA	-0.356263	NA	NA	0.105135	NA	NA	NA	NA	3	1	2
Cox6a1	NA	-0.137021	NA	NA	0.617045	NA	4.26487	0.18483	NA	NA	NA	NA	3	1	2
Auts2	NA	NA	-0.456623	NA	NA	0.129367	NA	0.186201	0.544883	NA	NA	NA	3	1	2
Ash1l	NA	NA	0.103771	NA	NA	0.175451	NA	-0.169991	NA	NA	0.496554	NA	3	1	2
Dennd4a	NA	NA	0.410801	NA	NA	0.567274	NA	0.198069	NA	NA	NA	-0.137038	3	1	2
Nfyc	NA	NA	-0.14323	NA	NA	0.168248	NA	0.113046	NA	NA	NA	0.397468	3	1	2
4931406P16Rik	NA	NA	NA	0.568853	NA	NA	NA	-0.134866	NA	NA	1.01106	0.743182	3	1	2
Ndufs3	NA	NA	NA	0.380954	NA	0.211835	NA	0.341168	NA	NA	NA	-0.243823	3	1	2
Ptbp3	NA	NA	NA	NA	0.336475	0.114796	-1.02623	0.126946	NA	NA	NA	NA	3	1	2
Jak1	NA	NA	NA	NA	0.116491	NA	-1.4201	0.208927	NA	NA	NA	0.438884	3	1	2
Slc8a1	NA	NA	NA	NA	NA	0.884653	-1.39847	0.145903	NA	NA	0.760359	NA	3	1	2
Rundc3b	0.592176	NA	NA	NA	NA	NA	NA	NA	NA	NA	4.61715	NA	2	0	2
Mecom	0.524638	NA	NA	NA	NA	NA	NA	NA	NA	NA	4.35634	NA	2	0	2
Fli1	0.379505	NA	NA	NA	NA	NA	NA	NA	NA	NA	1.84743	NA	2	0	2
Ccny	0.29809	NA	NA	NA	NA	NA	NA	NA	NA	NA	0.712239	NA	2	0	2
Jmjd1c	0.439196	NA	NA	NA	NA	NA	NA	0.253144	NA	NA	NA	NA	2	0	2
Atp10a	0.456242	NA	NA	NA	NA	NA	NA	NA	NA	NA	2.42485	NA	2	0	2
Gm15738	0.899144	NA	NA	NA	NA	NA	NA	0.134363	NA	NA	NA	NA	2	0	2
Limch1	0.442728	NA	NA	NA	NA	NA	NA	NA	NA	NA	2.32491	NA	2	0	2
Plcb1	0.451092	NA	NA	NA	NA	NA	NA	NA	NA	NA	2.18398	NA	2	0	2
Pdgfd	0.466026	NA	NA	NA	NA	NA	NA	NA	NA	NA	1.73971	NA	2	0	2
Etv6	0.819589	NA	NA	NA	NA	0.356957	NA	NA	NA	NA	NA	NA	2	0	2
Wwtr1	0.153316	NA	NA	NA	NA	0.201072	NA	NA	NA	NA	NA	NA	2	0	2
Prkch	0.369852	NA	NA	NA	NA	NA	NA	NA	NA	NA	4.42609	NA	2	0	2
Elmo1	0.562611	NA	NA	NA	NA	NA	NA	0.196026	NA	NA	NA	NA	2	0	2
Cobll1	0.155889	NA	NA	NA	NA	0.157189	NA	NA	NA	NA	NA	NA	2	0	2
Tmtc1	0.514617	NA	NA	NA	NA	0.458565	NA	NA	NA	NA	NA	NA	2	0	2
Rai14	0.412886	NA	NA	NA	NA	NA	NA	NA	NA	NA	1.17823	NA	2	0	2
Adgrl2	0.338473	NA	NA	NA	NA	NA	NA	NA	NA	NA	1.55066	NA	2	0	2
Insyn2a	1.07195	NA	NA	NA	NA	NA	NA	0.210071	NA	NA	NA	NA	2	0	2
Ppm1h	0.743182	NA	NA	NA	NA	NA	NA	0.460923	NA	NA	NA	NA	2	0	2
Aopep	0.261923	NA	NA	NA	NA	0.210363	NA	NA	NA	NA	NA	NA	2	0	2
St3gal1	0.271141	NA	NA	NA	NA	NA	NA	NA	NA	NA	1.85352	NA	2	0	2
Fgd5	0.199407	NA	NA	NA	NA	NA	NA	NA	NA	NA	5.48303	NA	2	0	2
Pard3b	0.710285	NA	NA	NA	NA	0.135493	NA	NA	NA	NA	NA	NA	2	0	2
Plekhg1	0.458451	NA	NA	NA	NA	NA	NA	0.245621	NA	NA	NA	NA	2	0	2
Abcc4	0.301989	NA	NA	NA	NA	NA	NA	NA	NA	NA	6.6146	NA	2	0	2
Tbc1d4	0.433939	NA	NA	NA	NA	NA	NA	NA	NA	NA	2.01033	NA	2	0	2
Fmnl2	0.442711	NA	NA	NA	NA	NA	NA	0.154321	NA	NA	NA	NA	2	0	2
Myo1e	0.346565	NA	NA	NA	NA	NA	NA	NA	NA	NA	0.962555	NA	2	0	2
Ptprk	0.685102	NA	NA	NA	NA	0.166574	NA	NA	NA	NA	NA	NA	2	0	2
Pros1	0.149408	NA	NA	NA	NA	0.201443	NA	NA	NA	NA	NA	NA	2	0	2
Kansl1	0.298442	NA	NA	NA	NA	NA	NA	0.180946	NA	NA	NA	NA	2	0	2
Tacc1	0.120345	NA	NA	NA	NA	0.113246	NA	NA	NA	NA	NA	NA	2	0	2
Mfhas1	0.291069	NA	NA	NA	NA	NA	NA	NA	NA	NA	1.38184	NA	2	0	2
Smurf2	0.183074	NA	NA	NA	NA	0.554357	NA	NA	NA	NA	NA	NA	2	0	2
Luc7l2	0.143842	0.160223	NA	NA	NA	NA	NA	NA	NA	NA	NA	NA	2	0	2
Plxna2	0.237009	NA	NA	NA	NA	NA	NA	NA	NA	NA	0.742934	NA	2	0	2
Lama5	0.214789	NA	NA	NA	NA	NA	NA	NA	NA	NA	0.397669	NA	2	0	2
Lrch1	0.352887	NA	NA	NA	NA	NA	NA	NA	NA	NA	1.08143	NA	2	0	2
Pias1	0.330624	NA	NA	NA	NA	0.132613	NA	NA	NA	NA	NA	NA	2	0	2
Rora	0.269999	NA	NA	NA	NA	NA	NA	0.451115	NA	NA	NA	NA	2	0	2
Dennd3	0.289597	NA	NA	NA	NA	NA	NA	NA	NA	NA	1.26613	NA	2	0	2
Cp	0.151544	NA	NA	NA	NA	0.202314	NA	NA	NA	NA	NA	NA	2	0	2
Arhgap26	0.580497	NA	NA	NA	NA	NA	NA	NA	NA	NA	0.933695	NA	2	0	2
Galnt18	0.673012	NA	NA	NA	NA	NA	NA	NA	NA	NA	0.974232	NA	2	0	2
Epha4	0.465991	NA	NA	NA	NA	NA	NA	NA	NA	NA	2.74671	NA	2	0	2
Smyd3	0.811732	NA	NA	NA	NA	NA	NA	0.345295	NA	NA	NA	NA	2	0	2
Zfp704	0.375606	NA	NA	NA	NA	NA	NA	0.205597	NA	NA	NA	NA	2	0	2
Kdm6a	0.536674	NA	NA	NA	NA	NA	NA	0.123694	NA	NA	NA	NA	2	0	2
Scaf8	0.463986	NA	NA	NA	NA	NA	NA	0.121678	NA	NA	NA	NA	2	0	2
Arhgef3	0.336598	NA	NA	NA	NA	NA	NA	NA	NA	NA	1.02865	NA	2	0	2
Anapc4	0.162231	NA	NA	NA	NA	NA	NA	NA	0.514455	NA	NA	NA	2	0	2
Sema3c	0.20325	NA	NA	NA	NA	NA	NA	NA	NA	NA	2.08874	NA	2	0	2
Entpd1	0.367021	NA	NA	NA	NA	NA	NA	NA	NA	NA	1.71574	NA	2	0	2
Anks1	0.27078	NA	NA	NA	NA	NA	NA	0.340328	NA	NA	NA	NA	2	0	2
Herc4	0.477048	NA	NA	NA	NA	NA	NA	0.186845	NA	NA	NA	NA	2	0	2
Fyn	0.30015	NA	NA	NA	NA	NA	NA	0.132287	NA	NA	NA	NA	2	0	2
Ppard	0.290078	NA	NA	NA	NA	NA	NA	0.152086	NA	NA	NA	NA	2	0	2
Nhsl1	0.408673	NA	NA	NA	NA	0.131871	NA	NA	NA	NA	NA	NA	2	0	2
Ttc7b	0.385711	NA	NA	NA	NA	0.102265	NA	NA	NA	NA	NA	NA	2	0	2
Faf1	0.232519	NA	NA	NA	NA	NA	NA	NA	NA	NA	NA	0.743247	2	0	2
Klhl2	0.219942	NA	NA	NA	NA	NA	NA	NA	NA	NA	1.62065	NA	2	0	2
Rin2	0.129271	NA	NA	NA	NA	NA	NA	NA	NA	NA	NA	0.108695	2	0	2
Zbtb16	0.319434	NA	NA	NA	NA	NA	NA	NA	0.706343	NA	NA	NA	2	0	2
Fnip1	0.289408	NA	NA	NA	NA	NA	NA	NA	NA	NA	NA	0.202024	2	0	2
Cep350	0.359882	NA	0.63138	NA	NA	NA	NA	NA	NA	NA	NA	NA	2	0	2
Zfp366	0.296746	NA	NA	NA	NA	NA	NA	NA	NA	NA	4.10643	NA	2	0	2
Atxn7	0.625591	NA	NA	NA	NA	NA	NA	0.183593	NA	NA	NA	NA	2	0	2
Smg1	0.466206	NA	NA	NA	NA	0.146711	NA	NA	NA	NA	NA	NA	2	0	2
Ttc28	0.271195	NA	0.300942	NA	NA	NA	NA	NA	NA	NA	NA	NA	2	0	2
Zfx	0.256279	NA	NA	NA	NA	NA	NA	0.237472	NA	NA	NA	NA	2	0	2
Scfd1	0.193132	NA	NA	NA	NA	NA	NA	0.106328	NA	NA	NA	NA	2	0	2
Fndc3b	0.521218	NA	NA	NA	NA	0.794044	NA	NA	NA	NA	NA	NA	2	0	2
Gab2	0.492561	NA	NA	NA	NA	NA	NA	0.392974	NA	NA	NA	NA	2	0	2
Syncrip	0.176815	NA	NA	NA	NA	NA	NA	0.140606	NA	NA	NA	NA	2	0	2
Tmem87b	0.295027	NA	NA	0.170091	NA	NA	NA	NA	NA	NA	NA	NA	2	0	2
Csnk1g1	0.456154	NA	NA	NA	NA	NA	NA	0.454046	NA	NA	NA	NA	2	0	2
Cers4	0.283158	0.160662	NA	NA	NA	NA	NA	NA	NA	NA	NA	NA	2	0	2
Ralgapa2	0.842301	NA	NA	NA	NA	NA	NA	0.110419	NA	NA	NA	NA	2	0	2
Gm13919	0.602917	NA	NA	NA	NA	NA	NA	0.360429	NA	NA	NA	NA	2	0	2
Rab8b	0.217417	NA	NA	NA	NA	NA	NA	0.603548	NA	NA	NA	NA	2	0	2
Usp7	0.234052	NA	NA	NA	NA	0.165023	NA	NA	NA	NA	NA	NA	2	0	2
Plgrkt	0.232801	NA	NA	0.64026	NA	NA	NA	NA	NA	NA	NA	NA	2	0	2
Atf6	0.196321	NA	NA	NA	NA	NA	NA	0.137155	NA	NA	NA	NA	2	0	2
Yap1	0.187503	NA	NA	NA	NA	0.135651	NA	NA	NA	NA	NA	NA	2	0	2
Wwox	0.600795	NA	NA	NA	NA	NA	NA	0.215994	NA	NA	NA	NA	2	0	2
Gfod1	0.66057	NA	NA	NA	NA	NA	NA	0.392762	NA	NA	NA	NA	2	0	2
Ctif	0.486448	NA	NA	NA	NA	NA	NA	0.146169	NA	NA	NA	NA	2	0	2
Vgll4	0.346837	NA	NA	NA	NA	0.260191	NA	NA	NA	NA	NA	NA	2	0	2
Cdk14	0.479988	NA	NA	NA	NA	0.133205	NA	NA	NA	NA	NA	NA	2	0	2
Usp54	0.277634	NA	NA	NA	NA	NA	NA	0.119403	NA	NA	NA	NA	2	0	2
Stard9	0.374395	NA	NA	NA	NA	NA	NA	0.331616	NA	NA	NA	NA	2	0	2
Pde4d	0.532424	NA	NA	NA	NA	NA	NA	NA	NA	NA	NA	0.634786	2	0	2
Tbc1d23	0.106849	NA	NA	NA	NA	NA	NA	0.341914	NA	NA	NA	NA	2	0	2
Rin3	0.116639	NA	NA	NA	NA	NA	NA	NA	NA	NA	1.46976	NA	2	0	2
Trio	0.526403	NA	NA	NA	NA	0.287675	NA	NA	NA	NA	NA	NA	2	0	2
Prr5l	0.19202	NA	NA	NA	NA	NA	NA	0.221059	NA	NA	NA	NA	2	0	2
Nacc1	0.134098	NA	NA	NA	NA	NA	NA	NA	NA	NA	0.503895	NA	2	0	2
Eps8	0.135674	NA	NA	NA	NA	0.196203	NA	NA	NA	NA	NA	NA	2	0	2
Ankrd44	0.734357	NA	NA	NA	NA	NA	NA	0.509567	NA	NA	NA	NA	2	0	2
Arhgef28	0.253464	NA	0.429283	NA	NA	NA	NA	NA	NA	NA	NA	NA	2	0	2
Cables1	0.268077	NA	NA	0.42693	NA	NA	NA	NA	NA	NA	NA	NA	2	0	2
Zhx3	0.109936	NA	NA	NA	NA	NA	NA	0.117698	NA	NA	NA	NA	2	0	2
Sik1	0.109395	NA	NA	NA	NA	1.53299	NA	NA	NA	NA	NA	NA	2	0	2
Ppp4r1	0.182137	NA	NA	NA	NA	NA	NA	0.170277	NA	NA	NA	NA	2	0	2
Nlk	0.292124	NA	NA	NA	NA	NA	NA	0.150927	NA	NA	NA	NA	2	0	2
Prpf39	0.389164	NA	NA	NA	NA	0.252008	NA	NA	NA	NA	NA	NA	2	0	2
Dleu2	0.423549	NA	NA	NA	NA	NA	NA	NA	NA	NA	NA	0.219925	2	0	2
Adgrl3	0.505585	NA	NA	NA	NA	NA	NA	0.613947	NA	NA	NA	NA	2	0	2
Fam168a	0.180599	NA	NA	NA	NA	0.188425	NA	NA	NA	NA	NA	NA	2	0	2
Sipa1l3	0.475249	NA	NA	NA	NA	NA	NA	0.270005	NA	NA	NA	NA	2	0	2
Zdhhc14	0.530576	NA	NA	NA	NA	NA	NA	0.354334	NA	NA	NA	NA	2	0	2
Zfp532	0.404394	NA	NA	NA	NA	NA	NA	0.258698	NA	NA	NA	NA	2	0	2
Pbx3	0.408394	NA	NA	NA	NA	NA	NA	0.207795	NA	NA	NA	NA	2	0	2
Fnip2	0.393321	NA	NA	NA	NA	NA	NA	0.17829	NA	NA	NA	NA	2	0	2
Pi4ka	0.111387	NA	NA	NA	NA	NA	NA	0.116847	NA	NA	NA	NA	2	0	2
Trappc9	0.523748	NA	NA	NA	NA	NA	NA	0.233179	NA	NA	NA	NA	2	0	2
Dysf	0.521154	NA	NA	NA	NA	NA	NA	NA	NA	NA	1.11149	NA	2	0	2
Ago2	0.120937	NA	NA	NA	NA	0.190074	NA	NA	NA	NA	NA	NA	2	0	2
Farp1	0.296484	NA	NA	NA	NA	NA	NA	NA	NA	NA	NA	0.878423	2	0	2
Cep68	0.129144	NA	NA	NA	NA	NA	NA	NA	NA	NA	NA	0.236385	2	0	2
Raph1	0.257607	NA	NA	NA	NA	NA	NA	NA	NA	NA	NA	0.644581	2	0	2
Tfeb	0.107927	NA	NA	NA	NA	NA	NA	0.174559	NA	NA	NA	NA	2	0	2
Nsg2	NA	0.184364	NA	NA	NA	0.749756	NA	NA	NA	NA	NA	NA	2	0	2
Ccdc107	NA	0.423897	NA	NA	NA	NA	NA	NA	NA	NA	NA	0.286958	2	0	2
Emc4	NA	0.217625	NA	NA	NA	NA	NA	0.330719	NA	NA	NA	NA	2	0	2
C1qtnf12	NA	0.15806	NA	0.437469	NA	NA	NA	NA	NA	NA	NA	NA	2	0	2
Mia2	NA	0.413151	NA	NA	NA	0.108074	NA	NA	NA	NA	NA	NA	2	0	2
Tmem238	NA	0.286123	NA	0.599272	NA	NA	NA	NA	NA	NA	NA	NA	2	0	2
Ogn	NA	0.157363	NA	0.515563	NA	NA	NA	NA	NA	NA	NA	NA	2	0	2
Alg5	NA	0.377894	NA	0.462522	NA	NA	NA	NA	NA	NA	NA	NA	2	0	2
Ablim1	NA	0.170875	NA	NA	NA	NA	NA	NA	NA	NA	2.51867	NA	2	0	2
Pign	NA	NA	0.339219	NA	NA	NA	NA	0.134029	NA	NA	NA	NA	2	0	2
Tex2	NA	NA	0.686601	NA	NA	NA	NA	NA	NA	NA	NA	0.545366	2	0	2
Zfp277	NA	NA	0.179091	NA	NA	0.242419	NA	NA	NA	NA	NA	NA	2	0	2
Slc9a9	NA	NA	0.335261	NA	NA	NA	NA	0.496931	NA	NA	NA	NA	2	0	2
Abl2	NA	NA	0.18107	NA	NA	NA	NA	0.530071	NA	NA	NA	NA	2	0	2
Pde4b	NA	NA	0.363155	NA	NA	NA	NA	0.185922	NA	NA	NA	NA	2	0	2
Reps1	NA	NA	0.196373	NA	NA	0.145037	NA	NA	NA	NA	NA	NA	2	0	2
Kat7	NA	NA	0.126196	NA	NA	NA	NA	0.214572	NA	NA	NA	NA	2	0	2
Sdk2	NA	NA	1.19127	NA	NA	0.45627	NA	NA	NA	NA	NA	NA	2	0	2
Atg10	NA	NA	0.509526	NA	NA	NA	NA	0.138695	NA	NA	NA	NA	2	0	2
Vps8	NA	NA	0.126595	NA	NA	NA	NA	0.368241	NA	NA	NA	NA	2	0	2
Ext2	NA	NA	0.274774	NA	NA	NA	NA	0.31456	NA	NA	NA	NA	2	0	2
Armh3	NA	NA	0.146768	NA	NA	NA	NA	0.362928	NA	NA	NA	NA	2	0	2
Carmil1	NA	NA	0.114554	NA	NA	0.266625	NA	NA	NA	NA	NA	NA	2	0	2
Uba5	NA	NA	0.507365	NA	NA	NA	NA	0.202728	NA	NA	NA	NA	2	0	2
Zzz3	NA	NA	0.340587	NA	NA	0.578028	NA	NA	NA	NA	NA	NA	2	0	2
D430042O09Rik	NA	NA	0.106163	NA	NA	0.187835	NA	NA	NA	NA	NA	NA	2	0	2
Bdp1	NA	NA	0.166695	NA	NA	NA	NA	NA	NA	NA	NA	0.206085	2	0	2
Sned1	NA	NA	0.305022	NA	NA	0.480951	NA	NA	NA	NA	NA	NA	2	0	2
Otud7a	NA	NA	0.294366	NA	NA	NA	NA	0.182911	NA	NA	NA	NA	2	0	2
Park7	NA	NA	NA	0.370068	0.506536	NA	NA	NA	NA	NA	NA	NA	2	0	2
0610012G03Rik	NA	NA	NA	0.432985	NA	NA	NA	0.713234	NA	NA	NA	NA	2	0	2
Nit1	NA	NA	NA	0.459736	NA	NA	NA	0.165281	NA	NA	NA	NA	2	0	2
Mettl26	NA	NA	NA	0.373209	NA	0.525013	NA	NA	NA	NA	NA	NA	2	0	2
Pigu	NA	NA	NA	0.149827	NA	NA	NA	0.122828	NA	NA	NA	NA	2	0	2
Ctnnd2	NA	NA	NA	NA	NA	0.757465	NA	0.119915	NA	NA	NA	NA	2	0	2
Sox2ot	NA	NA	NA	NA	NA	0.633462	NA	NA	NA	NA	NA	0.491568	2	0	2
Dennd5b	NA	NA	NA	NA	NA	0.111126	NA	NA	NA	NA	0.909581	NA	2	0	2
Cacnb4	NA	NA	NA	NA	NA	0.278298	NA	0.135131	NA	NA	NA	NA	2	0	2
Ino80dos	NA	NA	NA	NA	NA	0.604616	NA	0.266237	NA	NA	NA	NA	2	0	2
Slc4a10	NA	NA	NA	NA	NA	1.28325	NA	0.790252	NA	NA	NA	NA	2	0	2
Rhobtb1	NA	NA	NA	NA	NA	0.252744	NA	NA	NA	NA	3.08416	NA	2	0	2
Slc22a23	NA	NA	NA	NA	NA	0.204179	NA	0.134059	NA	NA	NA	NA	2	0	2
Ppp1r9a	NA	NA	NA	NA	NA	0.292283	NA	0.192785	NA	NA	NA	NA	2	0	2
Sdccag8	NA	NA	NA	NA	NA	0.193273	NA	0.111466	NA	NA	NA	NA	2	0	2
Prkn	NA	NA	NA	NA	NA	0.343078	NA	0.420425	NA	NA	NA	NA	2	0	2
Rab30	NA	NA	NA	NA	NA	0.895431	NA	0.131684	NA	NA	NA	NA	2	0	2
Snx24	NA	NA	NA	NA	NA	0.555417	NA	0.388407	NA	NA	NA	NA	2	0	2
Rictor	NA	NA	NA	NA	NA	0.340209	NA	0.130657	NA	NA	NA	NA	2	0	2
Ppp2r2a	NA	NA	NA	NA	NA	0.168449	NA	NA	NA	NA	NA	0.335505	2	0	2
Hbs1l	NA	NA	NA	NA	NA	0.109287	NA	0.129532	NA	NA	NA	NA	2	0	2
Pde1a	NA	NA	NA	NA	NA	0.155311	NA	NA	1.13733	NA	NA	NA	2	0	2
Zfyve9	NA	NA	NA	NA	NA	0.285045	NA	0.251606	NA	NA	NA	NA	2	0	2
Slit2	NA	NA	NA	NA	NA	0.330814	NA	NA	0.409833	NA	NA	NA	2	0	2
Luzp2	NA	NA	NA	NA	NA	0.710303	NA	0.180028	NA	NA	NA	NA	2	0	2
Kctd16	NA	NA	NA	NA	NA	1.00068	NA	0.114024	NA	NA	NA	NA	2	0	2
Mgat5	NA	NA	NA	NA	NA	0.405674	NA	0.492846	NA	NA	NA	NA	2	0	2
Meis1	NA	NA	NA	NA	NA	0.630254	NA	0.277857	NA	NA	NA	NA	2	0	2
Ust	NA	NA	NA	NA	NA	0.97158	NA	NA	0.645979	NA	NA	NA	2	0	2
Fhit	NA	NA	NA	NA	NA	0.185302	NA	0.439604	NA	NA	NA	NA	2	0	2
Atf3	NA	NA	NA	NA	NA	0.599845	2.28821	NA	NA	NA	NA	NA	2	0	2
Lhfp	NA	NA	NA	NA	NA	1.22915	NA	NA	NA	NA	NA	0.948045	2	0	2
Arhgap6	NA	NA	NA	NA	NA	0.239408	NA	NA	NA	NA	NA	1.23325	2	0	2
Pcdh9	NA	NA	NA	NA	NA	1.08885	NA	0.144201	NA	NA	NA	NA	2	0	2
Npas3	NA	NA	NA	NA	NA	0.225715	NA	0.403901	NA	NA	NA	NA	2	0	2
Adamts6	NA	NA	NA	NA	NA	0.183889	NA	0.106679	NA	NA	NA	NA	2	0	2
Grik4	NA	NA	NA	NA	NA	0.162532	NA	0.654459	NA	NA	NA	NA	2	0	2
Gm16083	NA	NA	NA	NA	NA	0.100429	NA	NA	NA	NA	NA	0.382979	2	0	2
Rfx3	NA	NA	NA	NA	NA	0.122536	NA	0.164544	NA	NA	NA	NA	2	0	2
Lama2	NA	NA	NA	NA	NA	0.743378	NA	0.15625	NA	NA	NA	NA	2	0	2
Zfp438	NA	NA	NA	NA	NA	0.226615	NA	0.337471	NA	NA	NA	NA	2	0	2
Tcf7l1	NA	NA	NA	NA	NA	0.134881	NA	NA	1.17197	NA	NA	NA	2	0	2
Agps	NA	NA	NA	NA	NA	0.168191	NA	0.200861	NA	NA	NA	NA	2	0	2
Cep128	NA	NA	NA	NA	NA	0.203055	NA	0.162807	NA	NA	NA	NA	2	0	2
Macrod2	NA	NA	NA	NA	NA	0.644382	NA	NA	NA	NA	NA	0.752983	2	0	2
Bckdhb	NA	NA	NA	NA	NA	0.294891	NA	0.29655	NA	NA	NA	NA	2	0	2
Rnf217	NA	NA	NA	NA	NA	0.199194	NA	NA	NA	NA	NA	0.354406	2	0	2
Il1rapl1	NA	NA	NA	NA	NA	0.100378	NA	0.118394	NA	NA	NA	NA	2	0	2
Mbtd1	NA	NA	NA	NA	NA	0.17793	NA	0.178095	NA	NA	NA	NA	2	0	2
Fmnl3	NA	NA	NA	NA	NA	NA	3.99749	NA	NA	NA	1.75325	NA	2	0	2
Map3k2	NA	NA	NA	NA	NA	NA	3.88654	NA	NA	NA	NA	0.472063	2	0	2
5033421B08Rik	NA	NA	NA	NA	NA	NA	3.83497	0.288892	NA	NA	NA	NA	2	0	2
Peli2	NA	NA	NA	NA	NA	NA	NA	0.178375	NA	NA	NA	0.360456	2	0	2
Sh3kbp1	NA	NA	NA	NA	NA	NA	NA	0.210165	NA	NA	NA	0.286384	2	0	2
Ubash3b	NA	NA	NA	NA	NA	NA	NA	0.385393	NA	NA	NA	0.456033	2	0	2
Hdac7	NA	NA	NA	NA	NA	NA	NA	0.191551	NA	NA	0.339619	NA	2	0	2
Dnajc6	NA	NA	NA	NA	NA	NA	NA	0.206562	NA	NA	NA	0.395202	2	0	2
Efr3b	NA	NA	NA	NA	NA	NA	NA	0.202517	NA	NA	3.87791	NA	2	0	2
Gm10863	NA	NA	NA	NA	NA	NA	NA	0.221166	NA	NA	NA	0.104307	2	0	2
Tmem260	NA	NA	NA	NA	NA	NA	NA	0.11366	NA	NA	NA	0.205519	2	0	2
Tmem117	NA	NA	NA	NA	NA	NA	NA	0.13857	NA	NA	NA	0.801783	2	0	2
Tenm2	NA	NA	NA	NA	NA	NA	NA	0.264453	NA	NA	NA	1.511	2	0	2
Lrrtm3	NA	NA	NA	NA	NA	NA	NA	0.202626	NA	NA	0.490658	NA	2	0	2
Magi2	NA	NA	NA	NA	NA	NA	NA	0.164449	NA	NA	0.758494	NA	2	0	2
Ildr2	NA	NA	NA	NA	NA	NA	NA	NA	0.546726	NA	NA	0.478036	2	0	2
Itga6	NA	NA	NA	NA	NA	NA	NA	NA	NA	NA	3.52915	0.425801	2	0	2
Me3	NA	NA	NA	NA	NA	NA	NA	NA	NA	NA	1.40212	1.41174	2	0	2
Ndufa2	-0.189702	-0.359715	1.41489	NA	NA	NA	3.85687	0.263328	NA	NA	-0.645949	0.820304	4	3	1
Sarnp	-0.244193	NA	0.314715	NA	0.234665	-0.454511	NA	NA	0.400708	-2.28225	NA	0.381116	4	3	1
Clic1	-0.422132	0.517446	NA	0.509415	-1.08836	-0.287961	NA	NA	0.639848	NA	NA	0.35407	4	3	1
Fundc2	-0.402259	-0.494921	NA	0.635821	NA	0.104269	NA	0.232783	0.122464	NA	-0.438496	NA	4	3	1
Hsp90ab1	-0.386816	0.114165	0.313875	0.273384	NA	-0.815074	1.56329	-0.779402	NA	NA	NA	NA	4	3	1
Atp6ap2	0.437602	-0.478191	NA	0.273098	4.08178	-0.161472	NA	-0.195632	NA	NA	NA	0.721205	4	3	1
Eif5b	-0.256016	0.247198	-0.122435	NA	NA	0.331329	NA	0.128832	NA	-2.9919	NA	0.301451	4	3	1
Atp11c	0.340301	-0.515261	-0.293105	NA	-1.05479	0.534392	NA	NA	0.18469	NA	1.08227	NA	4	3	1
Car2	0.605687	-0.333889	NA	NA	NA	0.812259	3.57636	-0.958363	-1.91667	NA	NA	0.989815	4	3	1
Srgap2	0.533636	NA	-0.285252	NA	NA	NA	-1.14427	0.775546	NA	NA	0.847161	NA	3	2	1
Rpl13	-0.508255	0.21337	0.728745	0.412742	-1.57337	NA	NA	NA	NA	NA	NA	NA	3	2	1
Emc2	-0.219837	-0.19878	NA	NA	NA	0.199657	NA	0.132908	NA	NA	NA	0.340858	3	2	1
Psma1	-0.721447	0.256224	NA	0.436759	NA	-0.12901	NA	NA	0.886321	NA	NA	NA	3	2	1
Higd1a	-0.358616	-0.320177	NA	NA	NA	0.253771	NA	0.217806	1.23333	NA	NA	NA	3	2	1
Nedd8	-0.27397	-0.199126	NA	0.409056	NA	0.154629	NA	NA	NA	NA	NA	0.598019	3	2	1
Aurkaip1	-0.374742	NA	NA	0.406536	0.999928	-0.358083	NA	NA	0.827029	NA	NA	NA	3	2	1
Sgms1	0.321253	-0.175454	-0.361917	NA	NA	NA	NA	0.517628	NA	NA	2.59903	NA	3	2	1
Trip12	0.508477	-0.347067	-0.357616	NA	NA	0.304963	NA	NA	NA	NA	NA	0.351858	3	2	1
Strn3	0.164847	-0.149983	NA	NA	NA	0.175717	NA	NA	NA	NA	0.65904	-0.632089	3	2	1
Bcl2l1	0.241586	NA	NA	NA	NA	-0.583078	NA	0.115634	-1.30785	NA	1.97128	NA	3	2	1
Prdx2	-0.191192	-0.246698	NA	NA	NA	0.227267	3.61414	0.355474	NA	NA	NA	NA	3	2	1
Neat1	0.511153	NA	NA	-0.701721	NA	0.367372	NA	-0.222061	0.403745	NA	NA	NA	3	2	1
Ndufa12	0.147359	-0.386351	NA	NA	NA	NA	3.30498	0.336206	NA	NA	NA	-0.287265	3	2	1
Pon2	-0.277296	NA	NA	NA	0.125101	NA	NA	-0.288009	0.117798	NA	NA	0.319945	3	2	1
Fut8	0.268795	NA	-0.505693	NA	NA	0.285768	NA	0.100795	NA	NA	NA	-0.182902	3	2	1
Gphn	0.417558	0.508863	NA	-0.899898	NA	NA	NA	0.114588	NA	NA	NA	-0.430578	3	2	1
Selenok	-0.417124	0.168465	0.73715	NA	NA	NA	4.35791	-0.567971	NA	NA	NA	NA	3	2	1
Macf1	0.224673	NA	NA	NA	-0.837145	NA	-0.830296	0.227128	NA	NA	0.658123	NA	3	2	1
Reep5	0.271359	0.203722	NA	NA	NA	NA	NA	-0.326968	-0.373939	NA	NA	1.68129	3	2	1
Pigp	-0.160281	NA	NA	0.198586	NA	-0.644666	NA	0.290718	NA	NA	NA	0.608774	3	2	1
Baz2b	0.187984	NA	-0.464132	NA	NA	0.20729	-0.622892	0.203095	NA	NA	NA	NA	3	2	1
Wac	0.11671	NA	-0.454747	NA	-0.118095	0.136078	NA	0.124296	NA	NA	NA	NA	3	2	1
Pcca	0.51632	-0.618603	NA	NA	NA	0.173499	-2.23859	0.244454	NA	NA	NA	NA	3	2	1
Fryl	0.337323	NA	-0.168953	0.260815	NA	NA	NA	0.233516	NA	NA	NA	-0.195702	3	2	1
Celf1	0.317376	NA	-0.723119	NA	-0.577077	0.236013	NA	0.322451	NA	NA	NA	NA	3	2	1
Ddx3x	-0.14681	-0.131833	0.717058	NA	NA	NA	NA	0.24145	NA	NA	NA	0.455827	3	2	1
Lysmd4	0.633449	NA	NA	NA	NA	NA	-0.973664	0.226616	NA	NA	0.718628	-1.10434	3	2	1
Cd59a	-0.317821	0.109112	NA	NA	NA	NA	NA	1.09471	NA	NA	2.64168	-0.296349	3	2	1
Zfand3	0.343252	-0.738893	NA	-0.435969	NA	0.146114	NA	0.23193	NA	NA	NA	NA	3	2	1
Zcchc7	0.431214	NA	-0.198203	NA	-1.07441	0.195931	NA	0.189973	NA	NA	NA	NA	3	2	1
Rapgef6	0.423543	NA	-0.169787	0.207698	NA	NA	NA	0.212571	NA	NA	NA	-0.37797	3	2	1
Vti1a	0.557048	NA	-0.642262	NA	NA	0.181015	NA	0.430066	NA	NA	NA	-0.109811	3	2	1
Slc12a2	1.16467	-0.266752	1.26488	NA	NA	1.14898	NA	-0.251946	NA	NA	NA	NA	3	2	1
Atpif1	0.219409	-0.148217	NA	NA	NA	-0.614114	NA	0.739242	0.972539	NA	NA	NA	3	2	1
Arl3	0.154879	-0.281725	NA	NA	NA	-0.54673	NA	0.194926	NA	NA	NA	0.128348	3	2	1
Elf2	0.181367	NA	NA	NA	-2.1028	NA	NA	0.285115	0.86791	NA	NA	-0.291488	3	2	1
Tnpo1	0.273836	-0.553784	-0.550482	NA	NA	0.208319	NA	0.349505	NA	NA	NA	NA	3	2	1
Sppl3	0.305605	NA	NA	NA	NA	-0.164986	NA	0.151202	0.195363	NA	NA	-0.534005	3	2	1
Dlg1	0.366401	NA	-0.625309	NA	NA	NA	3.66245	0.225045	NA	NA	NA	-0.103137	3	2	1
Tmed10	-0.245585	0.160267	NA	0.164683	0.365298	NA	NA	-0.142822	NA	NA	NA	NA	3	2	1
Jarid2	0.244775	NA	-0.273277	NA	NA	0.15754	NA	0.217724	-0.972173	NA	NA	NA	3	2	1
Ubn2	0.261415	NA	-0.319608	NA	NA	-0.138481	NA	0.176362	0.234311	NA	NA	NA	3	2	1
Atp2c1	0.122339	-0.331152	NA	0.203289	NA	-0.172766	NA	NA	NA	NA	NA	0.243703	3	2	1
Gls	0.195023	-0.182435	NA	NA	NA	-0.248678	NA	0.634825	NA	NA	0.947668	NA	3	2	1
Rsbn1l	0.117137	NA	NA	NA	-0.921391	0.135946	NA	0.126296	NA	NA	NA	-0.410057	3	2	1
Ptar1	0.251706	NA	-0.39052	NA	NA	0.138451	NA	-0.593383	NA	NA	NA	0.785164	3	2	1
Clasp2	0.536375	NA	NA	NA	NA	0.174253	-1.80296	0.186486	NA	NA	NA	-0.17265	3	2	1
Tmem135	0.654069	NA	-0.250552	NA	NA	NA	-1.50436	0.191558	NA	NA	NA	0.267441	3	2	1
Abcc5	0.223744	NA	-0.222953	NA	NA	NA	NA	0.136347	1.27743	NA	-0.482648	NA	3	2	1
Chchd2	-0.15237	NA	1.55076	0.302475	NA	-0.45077	2.40275	NA	NA	NA	NA	NA	3	2	1
Cpq	0.66629	-0.11474	NA	NA	NA	0.64357	4.61321	NA	NA	NA	-0.655967	NA	3	2	1
Slmap	0.117655	-0.690405	-0.153959	NA	NA	0.227757	NA	0.322961	NA	NA	NA	NA	3	2	1
Lyst	0.318966	NA	-0.224043	NA	NA	0.357123	NA	0.139621	NA	NA	NA	-0.430949	3	2	1
Acvr1	0.329407	NA	NA	-0.563608	NA	0.552072	NA	0.191172	NA	NA	NA	-0.225763	3	2	1
Rbpj	0.205978	NA	-0.2582	NA	NA	-0.744589	NA	0.184937	NA	NA	NA	0.547035	3	2	1
Ppp6r3	0.155435	NA	-0.162017	NA	NA	-0.160068	NA	0.252029	NA	NA	NA	0.113452	3	2	1
Tbl1xr1	0.319951	NA	-0.316592	NA	NA	-0.157376	NA	0.181306	NA	NA	NA	0.590906	3	2	1
Scaper	0.288637	NA	-0.602774	NA	NA	0.317276	-0.663639	0.132511	NA	NA	NA	NA	3	2	1
Desi2	0.255374	NA	-0.557955	NA	NA	-0.147017	NA	0.168554	NA	NA	NA	0.23607	3	2	1
Hsd17b12	0.170363	0.109158	NA	NA	NA	-0.214611	3.2072	NA	-0.838048	NA	NA	NA	3	2	1
Ank	0.194953	NA	0.203327	-0.764931	NA	NA	3.61469	-0.120311	NA	NA	NA	NA	3	2	1
Hectd4	0.246308	NA	-0.228349	NA	NA	0.27146	-2.19027	NA	NA	NA	NA	0.323323	3	2	1
Usp32	0.323854	-0.860213	-0.336424	NA	NA	0.197146	NA	0.108371	NA	NA	NA	NA	3	2	1
Rev3l	0.306933	NA	-0.190735	NA	NA	-0.113202	NA	0.278457	NA	NA	NA	0.392871	3	2	1
Oxct1	NA	-0.610945	NA	0.168777	NA	-0.186152	NA	0.117155	0.329979	NA	NA	NA	3	2	1
Ostc	NA	0.169925	-0.573234	NA	NA	-0.115677	NA	NA	0.646175	NA	NA	0.418367	3	2	1
Spcs2	NA	0.235455	NA	NA	-1.41266	NA	3.49176	-0.653558	0.229307	NA	NA	NA	3	2	1
Filip1l	NA	1.2071	NA	-1.10739	0.808303	-0.482984	NA	0.60603	NA	NA	NA	NA	3	2	1
Aifm1	NA	-0.252639	NA	0.205792	NA	0.434266	NA	0.128443	-1.26942	NA	NA	NA	3	2	1
Scg5	NA	0.599808	-0.439467	NA	NA	0.448506	NA	-0.115388	NA	NA	NA	0.462535	3	2	1
Atp5f1	NA	-0.334158	1.19425	0.356311	-0.14502	NA	NA	NA	0.134599	NA	NA	NA	3	2	1
Rock1	NA	-0.111613	NA	NA	0.470372	0.109024	NA	-0.111883	NA	NA	NA	0.181413	3	2	1
Mapkap1	NA	-0.880762	-0.102504	NA	NA	0.305446	NA	NA	0.520816	NA	NA	0.324417	3	2	1
Knop1	NA	NA	-0.570626	0.485148	NA	-0.210299	NA	0.284554	NA	NA	0.82163	NA	3	2	1
Spock2	-0.806752	NA	NA	0.182337	NA	NA	NA	NA	NA	NA	3.31674	NA	2	1	1
Id3	-0.639701	0.792217	NA	NA	NA	0.97118	NA	NA	NA	NA	NA	NA	2	1	1
Sorbs2	0.439891	NA	-1.00836	NA	NA	NA	NA	NA	NA	NA	1.08022	NA	2	1	1
Zbtb20	0.418191	-0.562554	NA	NA	NA	NA	NA	0.119205	NA	NA	NA	NA	2	1	1
Esd	-0.27791	NA	NA	NA	NA	NA	NA	NA	0.54105	NA	NA	0.685763	2	1	1
Ckb	1.16044	NA	NA	NA	NA	NA	3.22417	-0.667356	NA	NA	NA	NA	2	1	1
Klf12	0.622909	NA	NA	NA	NA	NA	-3.37553	NA	NA	NA	0.824101	NA	2	1	1
Apbb2	0.642539	NA	0.542487	-0.400979	NA	NA	NA	NA	NA	NA	NA	NA	2	1	1
Ostf1	-0.570743	NA	NA	NA	NA	NA	NA	0.136483	NA	NA	0.394481	NA	2	1	1
F11r	-0.432713	0.54926	NA	NA	NA	NA	NA	NA	NA	NA	1.61841	NA	2	1	1
Iqgap1	-0.12539	NA	NA	NA	NA	0.145857	NA	0.21993	NA	NA	NA	NA	2	1	1
Sec11a	-0.257913	0.870472	NA	NA	NA	NA	NA	0.138831	NA	NA	NA	NA	2	1	1
Rere	0.424426	NA	-0.179015	NA	NA	NA	NA	0.227021	NA	NA	NA	NA	2	1	1
Chrac1	-0.705101	0.134098	NA	NA	NA	NA	NA	NA	0.172472	NA	NA	NA	2	1	1
Rbms1	0.14287	-0.699378	NA	NA	NA	NA	3.8014	NA	NA	NA	NA	NA	2	1	1
Afap1l1	-0.19184	NA	NA	NA	NA	NA	NA	0.20529	NA	NA	3.96815	NA	2	1	1
Pan3	0.568802	NA	NA	NA	NA	NA	NA	0.278601	NA	NA	NA	-0.258766	2	1	1
Pakap.1	-0.304024	NA	NA	NA	NA	NA	NA	0.21801	NA	NA	0.576152	NA	2	1	1
Gm37240	0.733799	NA	-0.99973	NA	NA	NA	NA	0.244853	NA	NA	NA	NA	2	1	1
Mydgf	-0.322608	0.222666	NA	0.618597	NA	NA	NA	NA	NA	NA	NA	NA	2	1	1
Agfg1	0.134458	NA	NA	0.751977	NA	-0.217208	NA	NA	NA	NA	NA	NA	2	1	1
Zeb1	0.411767	NA	NA	NA	NA	0.376835	-1.72955	NA	NA	NA	NA	NA	2	1	1
Lhfpl2	0.415742	NA	NA	NA	NA	0.374251	NA	NA	NA	NA	NA	-0.923981	2	1	1
Gm14211	0.795032	NA	NA	NA	NA	NA	NA	NA	NA	NA	1.63825	-1.18074	2	1	1
Tanc1	0.335845	NA	NA	NA	NA	NA	NA	0.121971	NA	NA	NA	-0.501426	2	1	1
Rabgap1l	0.584711	-0.616647	NA	NA	NA	0.356598	NA	NA	NA	NA	NA	NA	2	1	1
Chn2	0.456858	NA	NA	NA	NA	NA	NA	-0.625472	NA	NA	3.93077	NA	2	1	1
Ankhd1	0.388584	NA	-0.330361	NA	NA	NA	NA	0.15339	NA	NA	NA	NA	2	1	1
Mrpl54	-0.348036	NA	NA	0.402994	NA	NA	NA	0.313122	NA	NA	NA	NA	2	1	1
Zmat5	0.122028	0.269217	NA	NA	NA	NA	NA	-0.466135	NA	NA	NA	NA	2	1	1
Psap	0.314848	-0.712931	NA	NA	NA	NA	NA	0.177403	NA	NA	NA	NA	2	1	1
Stk3	0.449162	NA	NA	NA	NA	NA	NA	0.223593	NA	NA	NA	-0.561425	2	1	1
Tjp2	0.183555	NA	NA	NA	NA	0.1296	NA	-0.309926	NA	NA	NA	NA	2	1	1
Phactr1	0.394559	NA	-0.855938	NA	NA	NA	NA	NA	0.744012	NA	NA	NA	2	1	1
Tbl1x	0.212627	NA	-0.506446	NA	NA	NA	NA	0.440284	NA	NA	NA	NA	2	1	1
Nedd4l	0.621542	NA	NA	NA	NA	NA	NA	0.126387	NA	NA	NA	-0.330718	2	1	1
Mrpl58	0.387848	-0.290237	NA	NA	NA	0.187092	NA	NA	NA	NA	NA	NA	2	1	1
Babam2	0.405933	NA	NA	NA	NA	NA	-0.92875	NA	NA	NA	NA	0.236653	2	1	1
Stard13	0.445943	NA	NA	NA	NA	NA	NA	0.253568	NA	NA	-0.723167	NA	2	1	1
Mir100hg	0.915963	NA	NA	-0.366473	NA	NA	NA	0.167548	NA	NA	NA	NA	2	1	1
Cachd1	0.842359	-0.766096	NA	NA	NA	0.153365	NA	NA	NA	NA	NA	NA	2	1	1
Tceal9	-0.29404	NA	NA	NA	NA	0.454971	NA	NA	0.366284	NA	NA	NA	2	1	1
Myo9a	0.440514	NA	NA	NA	NA	-0.204975	NA	0.127958	NA	NA	NA	NA	2	1	1
Sik3	0.418494	NA	NA	-0.463709	NA	0.138286	NA	NA	NA	NA	NA	NA	2	1	1
Pik3r3	0.367153	NA	NA	-0.287668	NA	NA	NA	0.264708	NA	NA	NA	NA	2	1	1
Peak1	0.490703	NA	NA	NA	NA	NA	NA	0.65899	NA	NA	NA	-0.211684	2	1	1
Insig2	0.113591	-0.43925	NA	0.453469	NA	NA	NA	NA	NA	NA	NA	NA	2	1	1
Vcl	0.162265	NA	-0.492212	NA	NA	0.362199	NA	NA	NA	NA	NA	NA	2	1	1
Ano6	0.273952	NA	NA	NA	NA	0.257277	-2.11297	NA	NA	NA	NA	NA	2	1	1
Zfp148	0.268731	NA	-0.329543	NA	NA	NA	NA	NA	0.569363	NA	NA	NA	2	1	1
Scmh1	0.43848	NA	-0.290178	NA	NA	NA	NA	0.13319	NA	NA	NA	NA	2	1	1
Sertad2	-0.126921	NA	NA	NA	NA	NA	NA	0.123441	NA	NA	NA	0.116214	2	1	1
Cdc42bpa	0.184226	NA	NA	NA	NA	0.36747	NA	NA	NA	NA	NA	-0.448493	2	1	1
Pitpnc1	0.395498	NA	NA	NA	NA	NA	-1.33092	NA	NA	NA	NA	0.543031	2	1	1
Oxr1	0.203379	NA	NA	-0.950148	NA	NA	NA	0.153457	NA	NA	NA	NA	2	1	1
Hmbox1	0.353	NA	NA	NA	NA	-0.309384	NA	0.235322	NA	NA	NA	NA	2	1	1
Tmcc1	0.496977	NA	-0.416103	NA	NA	NA	NA	0.197462	NA	NA	NA	NA	2	1	1
Pds5a	0.510022	NA	-0.643871	NA	NA	NA	NA	0.113665	NA	NA	NA	NA	2	1	1
Atad2b	0.549962	NA	NA	-0.457252	NA	NA	NA	0.106934	NA	NA	NA	NA	2	1	1
Palmd	-0.300604	NA	NA	NA	NA	0.256138	NA	NA	NA	NA	1.30731	NA	2	1	1
Cd320	-0.157091	0.314833	NA	0.508481	NA	NA	NA	NA	NA	NA	NA	NA	2	1	1
Aak1	0.497243	NA	NA	NA	NA	-0.14249	NA	0.311396	NA	NA	NA	NA	2	1	1
Klhl24	0.115319	NA	NA	NA	NA	0.185993	NA	NA	NA	NA	NA	-0.256738	2	1	1
Rbm6	0.424992	NA	-0.392101	NA	NA	NA	NA	0.398327	NA	NA	NA	NA	2	1	1
Kalrn	0.56924	NA	NA	-0.502457	NA	NA	NA	NA	NA	NA	0.414779	NA	2	1	1
Brd1	0.18535	NA	NA	NA	NA	0.161515	NA	-0.12003	NA	NA	NA	NA	2	1	1
Psd3	0.509724	NA	-0.527318	NA	NA	0.13736	NA	NA	NA	NA	NA	NA	2	1	1
Csnk1g3	0.131569	NA	NA	NA	NA	-0.557884	NA	NA	NA	NA	NA	0.185052	2	1	1
Arid1a	0.13005	NA	-0.410198	0.38773	NA	NA	NA	NA	NA	NA	NA	NA	2	1	1
Usp47	0.12608	NA	-0.231346	NA	NA	0.282637	NA	NA	NA	NA	NA	NA	2	1	1
Epas1	-0.145152	0.286801	NA	NA	NA	NA	NA	NA	NA	NA	1.03085	NA	2	1	1
Ndufaf7	0.136756	NA	-1.04744	NA	NA	NA	NA	0.225212	NA	NA	NA	NA	2	1	1
Ap3b1	0.467134	NA	NA	NA	NA	-0.144946	NA	NA	NA	NA	NA	0.557027	2	1	1
Gna13	0.269901	NA	NA	NA	NA	-0.174811	NA	0.217336	NA	NA	NA	NA	2	1	1
Dpp8	0.264521	NA	0.136129	NA	NA	NA	NA	-0.204426	NA	NA	NA	NA	2	1	1
Dyrk1a	0.63418	NA	-0.169412	NA	NA	NA	NA	0.176804	NA	NA	NA	NA	2	1	1
Chd1	0.228279	NA	NA	NA	NA	NA	NA	NA	NA	-2.90798	NA	0.171355	2	1	1
Pomgnt1	0.297975	-0.623511	NA	NA	NA	NA	NA	0.337831	NA	NA	NA	NA	2	1	1
Immp2l	0.917985	NA	-0.673354	NA	NA	NA	NA	0.261622	NA	NA	NA	NA	2	1	1
Erc1	0.21497	NA	NA	NA	NA	0.813122	NA	NA	NA	NA	NA	-0.627621	2	1	1
Phip	0.173765	NA	0.121337	NA	NA	-0.364374	NA	NA	NA	NA	NA	NA	2	1	1
Myrip	0.409409	-0.998434	0.251004	NA	NA	NA	NA	NA	NA	NA	NA	NA	2	1	1
Dido1	0.163063	NA	NA	NA	NA	0.252987	NA	-0.122286	NA	NA	NA	NA	2	1	1
Lmna	-0.148802	0.136005	NA	0.115736	NA	NA	NA	NA	NA	NA	NA	NA	2	1	1
Fndc3a	0.338603	-0.728802	NA	NA	NA	NA	NA	0.309042	NA	NA	NA	NA	2	1	1
Taf1	0.429616	NA	NA	NA	NA	0.410802	NA	-0.488335	NA	NA	NA	NA	2	1	1
N4bp2l2	-0.18502	NA	0.662259	NA	NA	0.340417	NA	NA	NA	NA	NA	NA	2	1	1
Med13l	0.41916	NA	-0.754686	NA	NA	NA	NA	0.224809	NA	NA	NA	NA	2	1	1
Snx13	0.228382	NA	NA	NA	NA	NA	NA	-0.126489	NA	NA	1.13666	NA	2	1	1
Plxna4	0.802984	NA	NA	NA	NA	0.227998	-1.78808	NA	NA	NA	NA	NA	2	1	1
Ecpas	0.319934	-0.21293	NA	NA	NA	0.170273	NA	NA	NA	NA	NA	NA	2	1	1
Gbe1	0.288564	NA	NA	NA	NA	NA	NA	NA	NA	NA	1.84515	-0.426482	2	1	1
Mapk14	0.303625	NA	NA	NA	NA	NA	NA	0.560221	NA	NA	NA	-0.433806	2	1	1
Ap1g1	0.182491	-0.646936	NA	NA	NA	NA	NA	0.119896	NA	NA	NA	NA	2	1	1
Xpo1	0.312487	NA	-0.10607	NA	NA	NA	NA	0.117079	NA	NA	NA	NA	2	1	1
St5	0.502409	NA	-0.29309	NA	NA	NA	NA	0.100164	NA	NA	NA	NA	2	1	1
Fer	0.398441	NA	NA	-0.519574	NA	NA	NA	NA	NA	NA	NA	0.395949	2	1	1
Atf7ip	0.442016	NA	-0.304078	NA	NA	NA	NA	0.179245	NA	NA	NA	NA	2	1	1
Raf1	0.130347	NA	NA	NA	NA	NA	NA	NA	NA	NA	-0.821783	0.192549	2	1	1
Zfp182	0.592565	NA	-0.41065	NA	NA	NA	NA	0.114193	NA	NA	NA	NA	2	1	1
Slc10a7	0.340554	NA	-0.250876	NA	NA	NA	NA	0.353745	NA	NA	NA	NA	2	1	1
Kmt5b	0.128167	NA	-0.2881	NA	NA	NA	NA	0.168775	NA	NA	NA	NA	2	1	1
R3hdm1	0.272631	NA	NA	NA	NA	-0.303656	NA	NA	0.231499	NA	NA	NA	2	1	1
Pbx1	0.242138	NA	-0.334506	NA	NA	NA	NA	0.245586	NA	NA	NA	NA	2	1	1
Sfswap	0.457574	NA	NA	-0.122518	NA	NA	NA	NA	NA	NA	NA	0.427813	2	1	1
Gprasp1	0.168493	NA	NA	NA	NA	-0.193739	NA	0.42465	NA	NA	NA	NA	2	1	1
Tbc1d12	0.181716	NA	NA	NA	NA	NA	NA	-0.158815	NA	NA	NA	0.564389	2	1	1
Kat6b	0.241382	NA	-0.275863	NA	NA	NA	NA	0.565791	NA	NA	NA	NA	2	1	1
Phkb	0.579473	-0.123063	NA	NA	NA	NA	NA	0.313165	NA	NA	NA	NA	2	1	1
Phldb2	0.203022	NA	NA	NA	NA	NA	NA	NA	0.33608	NA	NA	-0.282432	2	1	1
Pik3ca	0.316615	NA	NA	NA	NA	-0.115788	NA	0.515213	NA	NA	NA	NA	2	1	1
Lpin2	0.536168	NA	NA	NA	NA	-0.300324	1.3966	NA	NA	NA	NA	NA	2	1	1
Srek1	0.185396	NA	0.238015	NA	NA	-0.132292	NA	NA	NA	NA	NA	NA	2	1	1
Agap1	0.523183	NA	NA	NA	NA	-0.149984	NA	0.177515	NA	NA	NA	NA	2	1	1
Epb41l2	0.224029	NA	NA	NA	-1.05106	NA	NA	0.103371	NA	NA	NA	NA	2	1	1
Foxo3	0.597185	NA	NA	NA	-1.65238	0.371129	NA	NA	NA	NA	NA	NA	2	1	1
Btbd10	0.142151	-0.501979	NA	NA	NA	NA	NA	NA	NA	NA	NA	0.524777	2	1	1
Elp4	0.502141	NA	-0.330439	NA	NA	NA	NA	0.130475	NA	NA	NA	NA	2	1	1
Dcaf6	0.303295	NA	-0.330928	NA	NA	NA	NA	NA	NA	NA	0.506112	NA	2	1	1
Tia1	0.233432	NA	NA	NA	NA	0.175073	NA	-0.178483	NA	NA	NA	NA	2	1	1
Ube3c	0.128178	NA	NA	-0.308276	NA	NA	NA	0.360036	NA	NA	NA	NA	2	1	1
Phf12	0.256878	NA	NA	NA	NA	0.326368	NA	NA	NA	NA	NA	-0.271068	2	1	1
Gpatch2	0.638054	NA	NA	NA	NA	-0.111935	NA	0.326643	NA	NA	NA	NA	2	1	1
Nrip1	0.380683	NA	-0.170461	NA	NA	NA	NA	0.178131	NA	NA	NA	NA	2	1	1
4632427E13Rik	0.256501	NA	-0.286007	NA	NA	0.144424	NA	NA	NA	NA	NA	NA	2	1	1
Xpo7	0.217582	NA	-0.299449	NA	NA	0.191497	NA	NA	NA	NA	NA	NA	2	1	1
Zzef1	0.31911	NA	NA	NA	NA	NA	NA	0.244987	NA	NA	NA	-0.169307	2	1	1
R3hcc1l	0.353266	NA	NA	NA	NA	-0.143414	NA	0.224262	NA	NA	NA	NA	2	1	1
Dhx30	0.118486	NA	-0.231349	NA	NA	0.254502	NA	NA	NA	NA	NA	NA	2	1	1
Rnf111	0.352304	NA	-0.379278	NA	NA	NA	NA	0.142687	NA	NA	NA	NA	2	1	1
Relch	0.44101	NA	-0.315769	NA	NA	0.570889	NA	NA	NA	NA	NA	NA	2	1	1
Zfc3h1	0.242346	NA	NA	-0.326352	NA	NA	NA	0.201516	NA	NA	NA	NA	2	1	1
Xrcc4	0.434055	NA	NA	NA	NA	NA	NA	0.18231	NA	NA	NA	-0.855163	2	1	1
Tbc1d22a	0.544848	NA	NA	NA	NA	-0.150008	NA	0.378103	NA	NA	NA	NA	2	1	1
Anapc1	0.272355	NA	-0.468453	NA	NA	NA	NA	0.207943	NA	NA	NA	NA	2	1	1
Lcorl	0.470072	NA	NA	NA	NA	0.793054	NA	-0.227065	NA	NA	NA	NA	2	1	1
Washc4	0.13427	NA	NA	NA	NA	0.595748	NA	NA	NA	NA	NA	-0.150777	2	1	1
Hipk2	0.504774	NA	0.122273	NA	NA	-0.110293	NA	NA	NA	NA	NA	NA	2	1	1
Ddi2	0.262191	NA	-0.920992	NA	NA	NA	3.84942	NA	NA	NA	NA	NA	2	1	1
Prkcb	-0.112645	NA	NA	NA	NA	NA	NA	0.206021	1.27829	NA	NA	NA	2	1	1
Cwc27	0.160523	NA	-0.185548	NA	NA	NA	NA	0.377814	NA	NA	NA	NA	2	1	1
Taf3	0.106872	NA	-0.749003	NA	NA	NA	NA	0.19467	NA	NA	NA	NA	2	1	1
A330023F24Rik	0.262348	NA	NA	NA	NA	-0.237586	NA	0.147254	NA	NA	NA	NA	2	1	1
Micos13	NA	-0.145197	NA	NA	NA	NA	NA	0.30346	NA	NA	NA	0.204763	2	1	1
Dnajc15	NA	-0.117525	1.40614	NA	NA	NA	NA	0.24214	NA	NA	NA	NA	2	1	1
Pfkp	NA	-0.379882	0.133571	NA	NA	0.110686	NA	NA	NA	NA	NA	NA	2	1	1
Mrps25	NA	-0.184876	NA	NA	NA	0.576901	NA	0.289378	NA	NA	NA	NA	2	1	1
Phactr2	NA	-0.387864	0.270369	NA	NA	NA	NA	0.190883	NA	NA	NA	NA	2	1	1
B230118H07Rik	NA	0.107799	NA	NA	NA	0.223061	NA	-0.170679	NA	NA	NA	NA	2	1	1
P4ha1	NA	-0.322492	0.482203	NA	NA	NA	NA	0.140335	NA	NA	NA	NA	2	1	1
Atp5a1	NA	-0.469179	NA	0.147894	NA	NA	NA	0.102838	NA	NA	NA	NA	2	1	1
Casc4	NA	0.162491	NA	NA	NA	0.126595	NA	NA	NA	NA	NA	-0.403924	2	1	1
Mdfic	NA	-0.819529	NA	NA	NA	NA	4.33994	NA	0.415084	NA	NA	NA	2	1	1
Dab2	NA	-0.309767	NA	NA	NA	NA	1.88839	NA	NA	NA	NA	0.154269	2	1	1
Tmem108	NA	-0.690731	NA	NA	NA	0.251746	NA	0.274862	NA	NA	NA	NA	2	1	1
Ccdc34	NA	0.250497	NA	NA	NA	-0.74006	NA	0.248974	NA	NA	NA	NA	2	1	1
Atp5g3	NA	-0.299503	NA	NA	NA	NA	3.6028	0.669091	NA	NA	NA	NA	2	1	1
Ctsc	NA	-0.145216	NA	0.336483	0.932321	NA	NA	NA	NA	NA	NA	NA	2	1	1
Fnbp1l	NA	-0.468872	NA	NA	NA	0.178916	NA	NA	NA	NA	1.70461	NA	2	1	1
Blvrb	NA	0.464723	NA	0.399071	-1.91251	NA	NA	NA	NA	NA	NA	NA	2	1	1
Slc25a3	NA	-0.3256	NA	0.362603	NA	NA	NA	0.320421	NA	NA	NA	NA	2	1	1
Stx18	NA	-0.135717	NA	NA	NA	0.169962	NA	0.261929	NA	NA	NA	NA	2	1	1
Paqr5	NA	0.27414	NA	NA	NA	-0.382851	NA	NA	NA	NA	3.94756	NA	2	1	1
Lrp6	NA	0.530292	NA	NA	NA	NA	NA	0.394751	NA	NA	NA	-0.264023	2	1	1
Itpkb	NA	-0.40714	0.665474	NA	NA	NA	NA	NA	NA	NA	0.551819	NA	2	1	1
Aldoa	NA	-0.443836	NA	NA	0.449438	NA	0.785851	NA	NA	NA	NA	NA	2	1	1
Chic1	NA	-0.456755	NA	NA	NA	0.316551	NA	NA	NA	NA	NA	0.740209	2	1	1
Abi2	NA	NA	-0.232109	0.195936	NA	NA	NA	NA	NA	NA	NA	0.622343	2	1	1
Armc8	NA	NA	-0.635368	NA	NA	NA	NA	0.399674	NA	NA	1.98871	NA	2	1	1
Cyp51	NA	NA	0.208599	0.615739	NA	NA	NA	-0.788693	NA	NA	NA	NA	2	1	1
Fam162a	NA	NA	0.524564	NA	NA	-0.249282	NA	0.48153	NA	NA	NA	NA	2	1	1
Shroom3	NA	NA	-0.185628	NA	NA	0.246531	NA	0.208358	NA	NA	NA	NA	2	1	1
Garem1	NA	NA	-0.291645	NA	NA	0.106635	NA	0.138767	NA	NA	NA	NA	2	1	1
Rab11fip4	NA	NA	0.592186	NA	NA	-0.427104	NA	0.237313	NA	NA	NA	NA	2	1	1
Firre	NA	NA	-0.484853	NA	NA	NA	NA	0.233404	NA	NA	NA	1.01487	2	1	1
Prickle2	NA	NA	-0.615707	NA	NA	0.241888	NA	0.223258	NA	NA	NA	NA	2	1	1
Nemf	NA	NA	0.112196	NA	NA	0.343452	NA	NA	NA	NA	NA	-0.38263	2	1	1
Nxpe4	NA	NA	-0.338631	NA	NA	0.518003	NA	0.330352	NA	NA	NA	NA	2	1	1
Prkdc	NA	NA	-0.342867	NA	NA	NA	NA	0.444305	NA	NA	0.900442	NA	2	1	1
Mga	NA	NA	-0.386408	NA	NA	0.216734	NA	NA	NA	NA	NA	0.440688	2	1	1
Zfp236	NA	NA	-0.344487	NA	NA	0.113153	NA	0.16295	NA	NA	NA	NA	2	1	1
Cmip	NA	NA	-0.211473	NA	NA	NA	NA	0.214637	NA	NA	NA	0.542443	2	1	1
Notch2	NA	NA	-0.562777	NA	NA	0.266464	4.04815	NA	NA	NA	NA	NA	2	1	1
Ints8	NA	NA	0.47091	-0.349972	NA	NA	NA	0.221717	NA	NA	NA	NA	2	1	1
Specc1l	NA	NA	-0.163358	NA	NA	0.288298	NA	0.260544	NA	NA	NA	NA	2	1	1
Tlk1	NA	NA	0.133428	NA	-1.59763	NA	NA	0.227278	NA	NA	NA	NA	2	1	1
Qrich1	NA	NA	-0.213061	NA	NA	0.409695	NA	0.145738	NA	NA	NA	NA	2	1	1
Lmbr1	NA	NA	-0.775284	NA	NA	0.742749	NA	0.490287	NA	NA	NA	NA	2	1	1
Ctnna2	NA	NA	-0.447358	NA	NA	0.539376	NA	0.227246	NA	NA	NA	NA	2	1	1
Pwwp2a	NA	NA	NA	-0.463072	NA	0.417041	3.54259	NA	NA	NA	NA	NA	2	1	1
Mark1	NA	NA	NA	-0.471334	NA	NA	NA	NA	0.478994	NA	0.488588	NA	2	1	1
Cpsf7	NA	NA	NA	-0.637596	NA	NA	NA	0.15343	NA	NA	NA	0.234798	2	1	1
Tmem41b	NA	NA	NA	0.203576	NA	NA	NA	-0.317624	NA	NA	NA	0.13713	2	1	1
Hs2st1	NA	NA	NA	-0.240331	NA	0.367124	NA	0.195729	NA	NA	NA	NA	2	1	1
Zmynd8	NA	NA	NA	NA	NA	0.385802	NA	0.103645	NA	NA	-0.75651	NA	2	1	1
Mapre2	NA	NA	NA	NA	NA	0.682261	NA	0.167038	NA	NA	NA	-0.206952	2	1	1
Spsb1	NA	NA	NA	NA	NA	0.393037	NA	0.191312	NA	NA	-1.50028	NA	2	1	1
Usp48	NA	NA	NA	NA	NA	0.230761	NA	-0.200572	NA	NA	NA	0.334725	2	1	1
Ndufaf2	NA	NA	NA	NA	NA	0.302491	NA	NA	0.301769	NA	NA	-0.728343	2	1	1
Hat1	NA	NA	NA	NA	NA	0.598736	NA	0.214849	-1.05222	NA	NA	NA	2	1	1
Tm9sf4	NA	NA	NA	NA	NA	0.399861	NA	-0.106001	NA	NA	NA	0.11117	2	1	1
Txndc15	NA	NA	NA	NA	NA	0.110053	NA	-0.127271	NA	NA	NA	0.481236	2	1	1
Appl2	NA	NA	NA	NA	NA	0.193423	NA	0.147599	NA	NA	NA	-0.70715	2	1	1
Htt	NA	NA	NA	NA	NA	0.212812	NA	0.107373	-1.15037	NA	NA	NA	2	1	1
Mrpl51	NA	NA	NA	NA	NA	-0.582854	NA	0.572798	0.744468	NA	NA	NA	2	1	1
Arhgap39	NA	NA	NA	NA	NA	0.155479	NA	0.38596	NA	NA	NA	-0.362974	2	1	1
Prkca	NA	NA	NA	NA	NA	-0.244192	NA	0.146426	0.283214	NA	NA	NA	2	1	1
Wdr7	NA	NA	NA	NA	NA	0.509386	NA	0.112282	NA	NA	NA	-0.249193	2	1	1
Dock5	NA	NA	NA	NA	NA	NA	NA	0.132278	0.394625	NA	NA	-0.544433	2	1	1
Pde1c	NA	NA	NA	NA	NA	NA	NA	0.236421	NA	NA	-0.163757	0.362231	2	1	1
Ebf1	0.511636	NA	NA	NA	NA	NA	NA	NA	NA	NA	NA	NA	1	0	1
Mcc	0.451877	NA	NA	NA	NA	NA	NA	NA	NA	NA	NA	NA	1	0	1
Atrnl1	0.86629	NA	NA	NA	NA	NA	NA	NA	NA	NA	NA	NA	1	0	1
Pir	0.184942	NA	NA	NA	NA	NA	NA	NA	NA	NA	NA	NA	1	0	1
Nav1	0.424251	NA	NA	NA	NA	NA	NA	NA	NA	NA	NA	NA	1	0	1
Rbpms	0.235877	NA	NA	NA	NA	NA	NA	NA	NA	NA	NA	NA	1	0	1
Gm3848	0.840521	NA	NA	NA	NA	NA	NA	NA	NA	NA	NA	NA	1	0	1
Samd12	0.454463	NA	NA	NA	NA	NA	NA	NA	NA	NA	NA	NA	1	0	1
Chst11	0.665008	NA	NA	NA	NA	NA	NA	NA	NA	NA	NA	NA	1	0	1
Far2	0.624218	NA	NA	NA	NA	NA	NA	NA	NA	NA	NA	NA	1	0	1
Dach1	0.60143	NA	NA	NA	NA	NA	NA	NA	NA	NA	NA	NA	1	0	1
Ccdc85a	0.722723	NA	NA	NA	NA	NA	NA	NA	NA	NA	NA	NA	1	0	1
9530026P05Rik	0.535466	NA	NA	NA	NA	NA	NA	NA	NA	NA	NA	NA	1	0	1
Dync1i1	0.956181	NA	NA	NA	NA	NA	NA	NA	NA	NA	NA	NA	1	0	1
Glo1	0.194409	NA	NA	NA	NA	NA	NA	NA	NA	NA	NA	NA	1	0	1
Gm20631	0.905947	NA	NA	NA	NA	NA	NA	NA	NA	NA	NA	NA	1	0	1
Prex2	0.177407	NA	NA	NA	NA	NA	NA	NA	NA	NA	NA	NA	1	0	1
Cyth3	0.181811	NA	NA	NA	NA	NA	NA	NA	NA	NA	NA	NA	1	0	1
Svil	0.396277	NA	NA	NA	NA	NA	NA	NA	NA	NA	NA	NA	1	0	1
Sh3rf1	0.576434	NA	NA	NA	NA	NA	NA	NA	NA	NA	NA	NA	1	0	1
Fbxl7	0.648128	NA	NA	NA	NA	NA	NA	NA	NA	NA	NA	NA	1	0	1
Hmcn1	0.437066	NA	NA	NA	NA	NA	NA	NA	NA	NA	NA	NA	1	0	1
Lrrk1	0.451426	NA	NA	NA	NA	NA	NA	NA	NA	NA	NA	NA	1	0	1
Itpr2	0.183717	NA	NA	NA	NA	NA	NA	NA	NA	NA	NA	NA	1	0	1
Nxpe2	0.593461	NA	NA	NA	NA	NA	NA	NA	NA	NA	NA	NA	1	0	1
Smad2	0.19666	NA	NA	NA	NA	NA	NA	NA	NA	NA	NA	NA	1	0	1
Fbxw11	0.598374	NA	NA	NA	NA	NA	NA	NA	NA	NA	NA	NA	1	0	1
March3	0.942849	NA	NA	NA	NA	NA	NA	NA	NA	NA	NA	NA	1	0	1
Prkce	0.722874	NA	NA	NA	NA	NA	NA	NA	NA	NA	NA	NA	1	0	1
Nckap5	1.24029	NA	NA	NA	NA	NA	NA	NA	NA	NA	NA	NA	1	0	1
Nfat5	0.250093	NA	NA	NA	NA	NA	NA	NA	NA	NA	NA	NA	1	0	1
Zbtb46	0.462343	NA	NA	NA	NA	NA	NA	NA	NA	NA	NA	NA	1	0	1
Shank3	0.176007	NA	NA	NA	NA	NA	NA	NA	NA	NA	NA	NA	1	0	1
Grk5	0.747807	NA	NA	NA	NA	NA	NA	NA	NA	NA	NA	NA	1	0	1
Adgra2	0.106535	NA	NA	NA	NA	NA	NA	NA	NA	NA	NA	NA	1	0	1
Man2a1	0.133007	NA	NA	NA	NA	NA	NA	NA	NA	NA	NA	NA	1	0	1
Fam172a	0.526602	NA	NA	NA	NA	NA	NA	NA	NA	NA	NA	NA	1	0	1
Sh3bp4	0.148064	NA	NA	NA	NA	NA	NA	NA	NA	NA	NA	NA	1	0	1
Ppm1l	0.808936	NA	NA	NA	NA	NA	NA	NA	NA	NA	NA	NA	1	0	1
Sox7	0.487655	NA	NA	NA	NA	NA	NA	NA	NA	NA	NA	NA	1	0	1
Mtmr2	0.124679	NA	NA	NA	NA	NA	NA	NA	NA	NA	NA	NA	1	0	1
Hivep2	0.293813	NA	NA	NA	NA	NA	NA	NA	NA	NA	NA	NA	1	0	1
Pacs1	0.569312	NA	NA	NA	NA	NA	NA	NA	NA	NA	NA	NA	1	0	1
Dgkh	0.287956	NA	NA	NA	NA	NA	NA	NA	NA	NA	NA	NA	1	0	1
Hspa1a	0.553275	NA	NA	NA	NA	NA	NA	NA	NA	NA	NA	NA	1	0	1
Plpp1	0.256027	NA	NA	NA	NA	NA	NA	NA	NA	NA	NA	NA	1	0	1
Zfp423	0.845922	NA	NA	NA	NA	NA	NA	NA	NA	NA	NA	NA	1	0	1
St8sia6	0.308881	NA	NA	NA	NA	NA	NA	NA	NA	NA	NA	NA	1	0	1
Tm6sf1	0.157187	NA	NA	NA	NA	NA	NA	NA	NA	NA	NA	NA	1	0	1
Lyn	0.311119	NA	NA	NA	NA	NA	NA	NA	NA	NA	NA	NA	1	0	1
Qsox1	0.115332	NA	NA	NA	NA	NA	NA	NA	NA	NA	NA	NA	1	0	1
Evl	0.454813	NA	NA	NA	NA	NA	NA	NA	NA	NA	NA	NA	1	0	1
Ss18	0.200723	NA	NA	NA	NA	NA	NA	NA	NA	NA	NA	NA	1	0	1
Pgm5	0.10928	NA	NA	NA	NA	NA	NA	NA	NA	NA	NA	NA	1	0	1
Dipk2b	0.346038	NA	NA	NA	NA	NA	NA	NA	NA	NA	NA	NA	1	0	1
Osbpl8	0.458299	NA	NA	NA	NA	NA	NA	NA	NA	NA	NA	NA	1	0	1
Mill2	0.12898	NA	NA	NA	NA	NA	NA	NA	NA	NA	NA	NA	1	0	1
Msrb3	0.228913	NA	NA	NA	NA	NA	NA	NA	NA	NA	NA	NA	1	0	1
Sox13	0.157603	NA	NA	NA	NA	NA	NA	NA	NA	NA	NA	NA	1	0	1
Hltf	0.212271	NA	NA	NA	NA	NA	NA	NA	NA	NA	NA	NA	1	0	1
Lnx2	0.299693	NA	NA	NA	NA	NA	NA	NA	NA	NA	NA	NA	1	0	1
Inpp5d	0.754751	NA	NA	NA	NA	NA	NA	NA	NA	NA	NA	NA	1	0	1
Dapk1	0.340419	NA	NA	NA	NA	NA	NA	NA	NA	NA	NA	NA	1	0	1
2210408F21Rik	0.572712	NA	NA	NA	NA	NA	NA	NA	NA	NA	NA	NA	1	0	1
Dnah3	0.49738	NA	NA	NA	NA	NA	NA	NA	NA	NA	NA	NA	1	0	1
Kank4	0.355101	NA	NA	NA	NA	NA	NA	NA	NA	NA	NA	NA	1	0	1
Ppp1r16b	0.134829	NA	NA	NA	NA	NA	NA	NA	NA	NA	NA	NA	1	0	1
Rapgef4os1	0.657841	NA	NA	NA	NA	NA	NA	NA	NA	NA	NA	NA	1	0	1
Tbc1d1	0.167102	NA	NA	NA	NA	NA	NA	NA	NA	NA	NA	NA	1	0	1
Pnpla6	0.415231	NA	NA	NA	NA	NA	NA	NA	NA	NA	NA	NA	1	0	1
Flvcr2	0.253737	NA	NA	NA	NA	NA	NA	NA	NA	NA	NA	NA	1	0	1
Tsc22d2	0.312777	NA	NA	NA	NA	NA	NA	NA	NA	NA	NA	NA	1	0	1
Ankrd33b	0.530083	NA	NA	NA	NA	NA	NA	NA	NA	NA	NA	NA	1	0	1
Dcun1d3	0.203467	NA	NA	NA	NA	NA	NA	NA	NA	NA	NA	NA	1	0	1
Zranb1	0.25579	NA	NA	NA	NA	NA	NA	NA	NA	NA	NA	NA	1	0	1
C2cd2	0.107185	NA	NA	NA	NA	NA	NA	NA	NA	NA	NA	NA	1	0	1
Abca3	0.262606	NA	NA	NA	NA	NA	NA	NA	NA	NA	NA	NA	1	0	1
Fgd6	0.215202	NA	NA	NA	NA	NA	NA	NA	NA	NA	NA	NA	1	0	1
Trpv4	0.462652	NA	NA	NA	NA	NA	NA	NA	NA	NA	NA	NA	1	0	1
Man1a	0.410428	NA	NA	NA	NA	NA	NA	NA	NA	NA	NA	NA	1	0	1
Rcsd1	0.103712	NA	NA	NA	NA	NA	NA	NA	NA	NA	NA	NA	1	0	1
Rbms2	0.140128	NA	NA	NA	NA	NA	NA	NA	NA	NA	NA	NA	1	0	1
Rras2	0.294154	NA	NA	NA	NA	NA	NA	NA	NA	NA	NA	NA	1	0	1
Uhmk1	0.169051	NA	NA	NA	NA	NA	NA	NA	NA	NA	NA	NA	1	0	1
Piezo1	0.16956	NA	NA	NA	NA	NA	NA	NA	NA	NA	NA	NA	1	0	1
Ghr	0.399706	NA	NA	NA	NA	NA	NA	NA	NA	NA	NA	NA	1	0	1
Lmo7	0.136257	NA	NA	NA	NA	NA	NA	NA	NA	NA	NA	NA	1	0	1
Rapgef5	0.217062	NA	NA	NA	NA	NA	NA	NA	NA	NA	NA	NA	1	0	1
Tet3	0.480929	NA	NA	NA	NA	NA	NA	NA	NA	NA	NA	NA	1	0	1
Pde7b	0.458001	NA	NA	NA	NA	NA	NA	NA	NA	NA	NA	NA	1	0	1
8030462N17Rik	0.100784	NA	NA	NA	NA	NA	NA	NA	NA	NA	NA	NA	1	0	1
Apobec3	0.160301	NA	NA	NA	NA	NA	NA	NA	NA	NA	NA	NA	1	0	1
1700018A04Rik	0.504233	NA	NA	NA	NA	NA	NA	NA	NA	NA	NA	NA	1	0	1
Mphosph8	0.124927	NA	NA	NA	NA	NA	NA	NA	NA	NA	NA	NA	1	0	1
Katnbl1	0.173585	NA	NA	NA	NA	NA	NA	NA	NA	NA	NA	NA	1	0	1
Fendrr	0.498182	NA	NA	NA	NA	NA	NA	NA	NA	NA	NA	NA	1	0	1
Mfsd4a	0.373293	NA	NA	NA	NA	NA	NA	NA	NA	NA	NA	NA	1	0	1
Tecrl	0.214012	NA	NA	NA	NA	NA	NA	NA	NA	NA	NA	NA	1	0	1
Ica1	0.296732	NA	NA	NA	NA	NA	NA	NA	NA	NA	NA	NA	1	0	1
Enox2	0.481194	NA	NA	NA	NA	NA	NA	NA	NA	NA	NA	NA	1	0	1
Esco1	0.151923	NA	NA	NA	NA	NA	NA	NA	NA	NA	NA	NA	1	0	1
Apba1	0.327335	NA	NA	NA	NA	NA	NA	NA	NA	NA	NA	NA	1	0	1
Gm609	0.233963	NA	NA	NA	NA	NA	NA	NA	NA	NA	NA	NA	1	0	1
Yes1	0.114757	NA	NA	NA	NA	NA	NA	NA	NA	NA	NA	NA	1	0	1
Lmntd1	0.531751	NA	NA	NA	NA	NA	NA	NA	NA	NA	NA	NA	1	0	1
4921511C10Rik	0.404489	NA	NA	NA	NA	NA	NA	NA	NA	NA	NA	NA	1	0	1
Stk24	0.204585	NA	NA	NA	NA	NA	NA	NA	NA	NA	NA	NA	1	0	1
Cramp1l	0.118755	NA	NA	NA	NA	NA	NA	NA	NA	NA	NA	NA	1	0	1
BC005561	0.147281	NA	NA	NA	NA	NA	NA	NA	NA	NA	NA	NA	1	0	1
Tdrd7	0.122564	NA	NA	NA	NA	NA	NA	NA	NA	NA	NA	NA	1	0	1
Cplane1	0.226781	NA	NA	NA	NA	NA	NA	NA	NA	NA	NA	NA	1	0	1
Gm26632	0.412631	NA	NA	NA	NA	NA	NA	NA	NA	NA	NA	NA	1	0	1
Pdxdc1	0.162088	NA	NA	NA	NA	NA	NA	NA	NA	NA	NA	NA	1	0	1
9330175M20Rik	0.145396	NA	NA	NA	NA	NA	NA	NA	NA	NA	NA	NA	1	0	1
Cdh13	0.190064	NA	NA	NA	NA	NA	NA	NA	NA	NA	NA	NA	1	0	1
Tm2d3	NA	0.649711	NA	NA	NA	NA	NA	NA	NA	NA	NA	NA	1	0	1
Steap2	NA	0.141006	NA	NA	NA	NA	NA	NA	NA	NA	NA	NA	1	0	1
Aph1c	NA	0.101971	NA	NA	NA	NA	NA	NA	NA	NA	NA	NA	1	0	1
Ins2	NA	0.17954	NA	NA	NA	NA	NA	NA	NA	NA	NA	NA	1	0	1
Comtd1	NA	0.527251	NA	NA	NA	NA	NA	NA	NA	NA	NA	NA	1	0	1
Slc35a1	NA	0.109203	NA	NA	NA	NA	NA	NA	NA	NA	NA	NA	1	0	1
Avpi1	NA	0.18668	NA	NA	NA	NA	NA	NA	NA	NA	NA	NA	1	0	1
Fabp3	NA	0.70215	NA	NA	NA	NA	NA	NA	NA	NA	NA	NA	1	0	1
Hs6st2	NA	0.332682	NA	NA	NA	NA	NA	NA	NA	NA	NA	NA	1	0	1
Trmt9b	NA	NA	0.210859	NA	NA	NA	NA	NA	NA	NA	NA	NA	1	0	1
Nup93	NA	NA	0.246994	NA	NA	NA	NA	NA	NA	NA	NA	NA	1	0	1
Gsap	NA	NA	0.128365	NA	NA	NA	NA	NA	NA	NA	NA	NA	1	0	1
Arhgef7	NA	NA	0.39052	NA	NA	NA	NA	NA	NA	NA	NA	NA	1	0	1
Gm9925	NA	NA	0.80963	NA	NA	NA	NA	NA	NA	NA	NA	NA	1	0	1
Cep120	NA	NA	0.173758	NA	NA	NA	NA	NA	NA	NA	NA	NA	1	0	1
Gli2	NA	NA	0.232992	NA	NA	NA	NA	NA	NA	NA	NA	NA	1	0	1
Nos1ap	NA	NA	0.394706	NA	NA	NA	NA	NA	NA	NA	NA	NA	1	0	1
Scn8a	NA	NA	0.221433	NA	NA	NA	NA	NA	NA	NA	NA	NA	1	0	1
Zkscan3	NA	NA	0.157953	NA	NA	NA	NA	NA	NA	NA	NA	NA	1	0	1
Kcnip3	NA	NA	0.431273	NA	NA	NA	NA	NA	NA	NA	NA	NA	1	0	1
Actr3b	NA	NA	0.24044	NA	NA	NA	NA	NA	NA	NA	NA	NA	1	0	1
Slc4a3	NA	NA	0.31713	NA	NA	NA	NA	NA	NA	NA	NA	NA	1	0	1
Sufu	NA	NA	0.130723	NA	NA	NA	NA	NA	NA	NA	NA	NA	1	0	1
Adcy9	NA	NA	0.369251	NA	NA	NA	NA	NA	NA	NA	NA	NA	1	0	1
Usp3	NA	NA	0.19094	NA	NA	NA	NA	NA	NA	NA	NA	NA	1	0	1
Gabbr2	NA	NA	0.143465	NA	NA	NA	NA	NA	NA	NA	NA	NA	1	0	1
Tbc1d19	NA	NA	0.102837	NA	NA	NA	NA	NA	NA	NA	NA	NA	1	0	1
Frem1	NA	NA	0.520606	NA	NA	NA	NA	NA	NA	NA	NA	NA	1	0	1
Pigs	NA	NA	0.130136	NA	NA	NA	NA	NA	NA	NA	NA	NA	1	0	1
Vav3	NA	NA	0.338413	NA	NA	NA	NA	NA	NA	NA	NA	NA	1	0	1
Map7	NA	NA	0.706354	NA	NA	NA	NA	NA	NA	NA	NA	NA	1	0	1
Chst10	NA	NA	0.337255	NA	NA	NA	NA	NA	NA	NA	NA	NA	1	0	1
Uqcc1	NA	NA	0.179252	NA	NA	NA	NA	NA	NA	NA	NA	NA	1	0	1
Rfx4	NA	NA	0.189173	NA	NA	NA	NA	NA	NA	NA	NA	NA	1	0	1
Alkbh1	NA	NA	NA	1.25392	NA	NA	NA	NA	NA	NA	NA	NA	1	0	1
Ogfod3	NA	NA	NA	0.826081	NA	NA	NA	NA	NA	NA	NA	NA	1	0	1
Fgd4	NA	NA	NA	0.113223	NA	NA	NA	NA	NA	NA	NA	NA	1	0	1
Psmd5	NA	NA	NA	0.303155	NA	NA	NA	NA	NA	NA	NA	NA	1	0	1
2210016F16Rik	NA	NA	NA	0.711416	NA	NA	NA	NA	NA	NA	NA	NA	1	0	1
Grb10	NA	NA	NA	0.581804	NA	NA	NA	NA	NA	NA	NA	NA	1	0	1
Zbtb1	NA	NA	NA	0.187401	NA	NA	NA	NA	NA	NA	NA	NA	1	0	1
Mul1	NA	NA	NA	0.57799	NA	NA	NA	NA	NA	NA	NA	NA	1	0	1
Pik3r4	NA	NA	NA	0.419527	NA	NA	NA	NA	NA	NA	NA	NA	1	0	1
Rpp14	NA	NA	NA	0.836833	NA	NA	NA	NA	NA	NA	NA	NA	1	0	1
2510039O18Rik	NA	NA	NA	0.275123	NA	NA	NA	NA	NA	NA	NA	NA	1	0	1
Lsm1	NA	NA	NA	0.604292	NA	NA	NA	NA	NA	NA	NA	NA	1	0	1
Mpg	NA	NA	NA	0.826726	NA	NA	NA	NA	NA	NA	NA	NA	1	0	1
Aga	NA	NA	NA	0.283728	NA	NA	NA	NA	NA	NA	NA	NA	1	0	1
Zdhhc12	NA	NA	NA	0.620764	NA	NA	NA	NA	NA	NA	NA	NA	1	0	1
Sigmar1	NA	NA	NA	0.217454	NA	NA	NA	NA	NA	NA	NA	NA	1	0	1
Prr12	NA	NA	NA	0.307675	NA	NA	NA	NA	NA	NA	NA	NA	1	0	1
Cpt1c	NA	NA	NA	0.203497	NA	NA	NA	NA	NA	NA	NA	NA	1	0	1
Dut	NA	NA	NA	0.764479	NA	NA	NA	NA	NA	NA	NA	NA	1	0	1
Entr1	NA	NA	NA	0.363957	NA	NA	NA	NA	NA	NA	NA	NA	1	0	1
Nop14	NA	NA	NA	0.279306	NA	NA	NA	NA	NA	NA	NA	NA	1	0	1
Dnajc2	NA	NA	NA	0.971488	NA	NA	NA	NA	NA	NA	NA	NA	1	0	1
Chil1	NA	NA	NA	0.840902	NA	NA	NA	NA	NA	NA	NA	NA	1	0	1
Mtss2	NA	NA	NA	0.312542	NA	NA	NA	NA	NA	NA	NA	NA	1	0	1
Sft2d3	NA	NA	NA	0.805617	NA	NA	NA	NA	NA	NA	NA	NA	1	0	1
Lrrcc1	NA	NA	NA	0.683364	NA	NA	NA	NA	NA	NA	NA	NA	1	0	1
Exosc4	NA	NA	NA	0.48639	NA	NA	NA	NA	NA	NA	NA	NA	1	0	1
Wdr11	NA	NA	NA	0.479599	NA	NA	NA	NA	NA	NA	NA	NA	1	0	1
Ccdc102a	NA	NA	NA	0.148367	NA	NA	NA	NA	NA	NA	NA	NA	1	0	1
Mrpl45	NA	NA	NA	0.176939	NA	NA	NA	NA	NA	NA	NA	NA	1	0	1
Gfm1	NA	NA	NA	0.20201	NA	NA	NA	NA	NA	NA	NA	NA	1	0	1
Twistnb	NA	NA	NA	0.677348	NA	NA	NA	NA	NA	NA	NA	NA	1	0	1
Tug1	NA	NA	NA	0.184351	NA	NA	NA	NA	NA	NA	NA	NA	1	0	1
Mrpl50	NA	NA	NA	0.589968	NA	NA	NA	NA	NA	NA	NA	NA	1	0	1
Agpat1	NA	NA	NA	0.248277	NA	NA	NA	NA	NA	NA	NA	NA	1	0	1
Mrto4	NA	NA	NA	0.817023	NA	NA	NA	NA	NA	NA	NA	NA	1	0	1
Klc4	NA	NA	NA	0.249622	NA	NA	NA	NA	NA	NA	NA	NA	1	0	1
Glb1l	NA	NA	NA	0.567647	NA	NA	NA	NA	NA	NA	NA	NA	1	0	1
Lysmd3	NA	NA	NA	0.540921	NA	NA	NA	NA	NA	NA	NA	NA	1	0	1
Ing2	NA	NA	NA	0.173727	NA	NA	NA	NA	NA	NA	NA	NA	1	0	1
Armcx3	NA	NA	NA	0.354195	NA	NA	NA	NA	NA	NA	NA	NA	1	0	1
Naglu	NA	NA	NA	0.534715	NA	NA	NA	NA	NA	NA	NA	NA	1	0	1
Wdr72	NA	NA	NA	0.143781	NA	NA	NA	NA	NA	NA	NA	NA	1	0	1
Slc9a6	NA	NA	NA	0.198469	NA	NA	NA	NA	NA	NA	NA	NA	1	0	1
Fahd1	NA	NA	NA	0.710581	NA	NA	NA	NA	NA	NA	NA	NA	1	0	1
Decr1	NA	NA	NA	0.784392	NA	NA	NA	NA	NA	NA	NA	NA	1	0	1
Dpp3	NA	NA	NA	0.582064	NA	NA	NA	NA	NA	NA	NA	NA	1	0	1
Nup54	NA	NA	NA	0.220061	NA	NA	NA	NA	NA	NA	NA	NA	1	0	1
Dbn1	NA	NA	NA	0.267211	NA	NA	NA	NA	NA	NA	NA	NA	1	0	1
Gxylt1	NA	NA	NA	0.246832	NA	NA	NA	NA	NA	NA	NA	NA	1	0	1
Ccnq	NA	NA	NA	0.720339	NA	NA	NA	NA	NA	NA	NA	NA	1	0	1
Mlycd	NA	NA	NA	0.16262	NA	NA	NA	NA	NA	NA	NA	NA	1	0	1
Timm50	NA	NA	NA	0.429662	NA	NA	NA	NA	NA	NA	NA	NA	1	0	1
Cgn	NA	NA	NA	0.268404	NA	NA	NA	NA	NA	NA	NA	NA	1	0	1
Ppfibp1	NA	NA	NA	0.641825	NA	NA	NA	NA	NA	NA	NA	NA	1	0	1
Taok2	NA	NA	NA	0.309854	NA	NA	NA	NA	NA	NA	NA	NA	1	0	1
Pmm2	NA	NA	NA	0.221774	NA	NA	NA	NA	NA	NA	NA	NA	1	0	1
Fbh1	NA	NA	NA	0.584132	NA	NA	NA	NA	NA	NA	NA	NA	1	0	1
Atpsckmt	NA	NA	NA	0.560014	NA	NA	NA	NA	NA	NA	NA	NA	1	0	1
Dsp	NA	NA	NA	0.638401	NA	NA	NA	NA	NA	NA	NA	NA	1	0	1
2310033P09Rik	NA	NA	NA	0.699682	NA	NA	NA	NA	NA	NA	NA	NA	1	0	1
Mrpl16	NA	NA	NA	0.494648	NA	NA	NA	NA	NA	NA	NA	NA	1	0	1
Ppp1r9b	NA	NA	NA	0.278421	NA	NA	NA	NA	NA	NA	NA	NA	1	0	1
Gt(ROSA)26Sor	NA	NA	NA	0.278447	NA	NA	NA	NA	NA	NA	NA	NA	1	0	1
Sf3a1	NA	NA	NA	0.699061	NA	NA	NA	NA	NA	NA	NA	NA	1	0	1
Ccdc126	NA	NA	NA	0.162996	NA	NA	NA	NA	NA	NA	NA	NA	1	0	1
Spty2d1	NA	NA	NA	0.331809	NA	NA	NA	NA	NA	NA	NA	NA	1	0	1
Defb9	NA	NA	NA	0.813271	NA	NA	NA	NA	NA	NA	NA	NA	1	0	1
Fam110b	NA	NA	NA	0.354086	NA	NA	NA	NA	NA	NA	NA	NA	1	0	1
Mgat1	NA	NA	NA	0.245005	NA	NA	NA	NA	NA	NA	NA	NA	1	0	1
Ifi30	NA	NA	NA	NA	0.279843	NA	NA	NA	NA	NA	NA	NA	1	0	1
Mpeg1	NA	NA	NA	NA	0.332017	NA	NA	NA	NA	NA	NA	NA	1	0	1
Tex26	NA	NA	NA	NA	NA	0.367412	NA	NA	NA	NA	NA	NA	1	0	1
Hacl1	NA	NA	NA	NA	NA	0.212856	NA	NA	NA	NA	NA	NA	1	0	1
Togaram2	NA	NA	NA	NA	NA	0.279707	NA	NA	NA	NA	NA	NA	1	0	1
Golga4	NA	NA	NA	NA	NA	0.371937	NA	NA	NA	NA	NA	NA	1	0	1
Ttll6	NA	NA	NA	NA	NA	0.230591	NA	NA	NA	NA	NA	NA	1	0	1
Vwa3b	NA	NA	NA	NA	NA	0.166678	NA	NA	NA	NA	NA	NA	1	0	1
Dock8	NA	NA	NA	NA	NA	0.125367	NA	NA	NA	NA	NA	NA	1	0	1
Gm10419	NA	NA	NA	NA	NA	0.156984	NA	NA	NA	NA	NA	NA	1	0	1
Arhgef4	NA	NA	NA	NA	NA	0.445654	NA	NA	NA	NA	NA	NA	1	0	1
Unc13c	NA	NA	NA	NA	NA	0.793722	NA	NA	NA	NA	NA	NA	1	0	1
Mks1	NA	NA	NA	NA	NA	0.27549	NA	NA	NA	NA	NA	NA	1	0	1
Smo	NA	NA	NA	NA	NA	0.398723	NA	NA	NA	NA	NA	NA	1	0	1
Vps13a	NA	NA	NA	NA	NA	0.3467	NA	NA	NA	NA	NA	NA	1	0	1
Rbms3	NA	NA	NA	NA	NA	1.03845	NA	NA	NA	NA	NA	NA	1	0	1
Slc31a1	NA	NA	NA	NA	NA	1.61304	NA	NA	NA	NA	NA	NA	1	0	1
Pitpnm3	NA	NA	NA	NA	NA	0.157254	NA	NA	NA	NA	NA	NA	1	0	1
St6gal1	NA	NA	NA	NA	NA	0.285242	NA	NA	NA	NA	NA	NA	1	0	1
Thrb	NA	NA	NA	NA	NA	0.467567	NA	NA	NA	NA	NA	NA	1	0	1
Haghl	NA	NA	NA	NA	NA	0.107617	NA	NA	NA	NA	NA	NA	1	0	1
Map2	NA	NA	NA	NA	NA	0.129755	NA	NA	NA	NA	NA	NA	1	0	1
Vps50	NA	NA	NA	NA	NA	0.118524	NA	NA	NA	NA	NA	NA	1	0	1
Helz	NA	NA	NA	NA	NA	0.325781	NA	NA	NA	NA	NA	NA	1	0	1
Fsip1	NA	NA	NA	NA	NA	0.183899	NA	NA	NA	NA	NA	NA	1	0	1
Mmaa	NA	NA	NA	NA	NA	0.119734	NA	NA	NA	NA	NA	NA	1	0	1
Spag1	NA	NA	NA	NA	NA	0.14524	NA	NA	NA	NA	NA	NA	1	0	1
Ptprd	NA	NA	NA	NA	NA	0.318936	NA	NA	NA	NA	NA	NA	1	0	1
Eef2k	NA	NA	NA	NA	NA	0.133411	NA	NA	NA	NA	NA	NA	1	0	1
Mrps35	NA	NA	NA	NA	NA	0.216707	NA	NA	NA	NA	NA	NA	1	0	1
Rit2	NA	NA	NA	NA	NA	0.258233	NA	NA	NA	NA	NA	NA	1	0	1
Ccdc151	NA	NA	NA	NA	NA	0.106203	NA	NA	NA	NA	NA	NA	1	0	1
Uhrf1bp1l	NA	NA	NA	NA	NA	0.293028	NA	NA	NA	NA	NA	NA	1	0	1
Map9	NA	NA	NA	NA	NA	0.198479	NA	NA	NA	NA	NA	NA	1	0	1
Unc5cl	NA	NA	NA	NA	NA	0.58422	NA	NA	NA	NA	NA	NA	1	0	1
Cep63	NA	NA	NA	NA	NA	0.203448	NA	NA	NA	NA	NA	NA	1	0	1
Ankub1	NA	NA	NA	NA	NA	0.253696	NA	NA	NA	NA	NA	NA	1	0	1
Fosb	NA	NA	NA	NA	NA	0.873885	NA	NA	NA	NA	NA	NA	1	0	1
Spata7	NA	NA	NA	NA	NA	0.137921	NA	NA	NA	NA	NA	NA	1	0	1
Efcab7	NA	NA	NA	NA	NA	0.142741	NA	NA	NA	NA	NA	NA	1	0	1
Slc24a4	NA	NA	NA	NA	NA	0.594411	NA	NA	NA	NA	NA	NA	1	0	1
Dph6	NA	NA	NA	NA	NA	0.355787	NA	NA	NA	NA	NA	NA	1	0	1
Kyat3	NA	NA	NA	NA	NA	0.229637	NA	NA	NA	NA	NA	NA	1	0	1
Efl1	NA	NA	NA	NA	NA	0.20266	NA	NA	NA	NA	NA	NA	1	0	1
Cacnb2	NA	NA	NA	NA	NA	0.352496	NA	NA	NA	NA	NA	NA	1	0	1
Zfhx2	NA	NA	NA	NA	NA	0.100164	NA	NA	NA	NA	NA	NA	1	0	1
Mthfs	NA	NA	NA	NA	NA	0.231726	NA	NA	NA	NA	NA	NA	1	0	1
Ttll11	NA	NA	NA	NA	NA	0.806156	NA	NA	NA	NA	NA	NA	1	0	1
Kif11	NA	NA	NA	NA	NA	0.481593	NA	NA	NA	NA	NA	NA	1	0	1
Kif24	NA	NA	NA	NA	NA	0.250953	NA	NA	NA	NA	NA	NA	1	0	1
Slc20a1	NA	NA	NA	NA	NA	0.25001	NA	NA	NA	NA	NA	NA	1	0	1
Kcnb1	NA	NA	NA	NA	NA	0.133682	NA	NA	NA	NA	NA	NA	1	0	1
Pdlim3	NA	NA	NA	NA	NA	0.761196	NA	NA	NA	NA	NA	NA	1	0	1
Cdadc1	NA	NA	NA	NA	NA	0.479235	NA	NA	NA	NA	NA	NA	1	0	1
Lrp1b	NA	NA	NA	NA	NA	1.82066	NA	NA	NA	NA	NA	NA	1	0	1
Ift122	NA	NA	NA	NA	NA	0.159074	NA	NA	NA	NA	NA	NA	1	0	1
Slc22a4	NA	NA	NA	NA	NA	0.177011	NA	NA	NA	NA	NA	NA	1	0	1
Nrxn3	NA	NA	NA	NA	NA	0.790488	NA	NA	NA	NA	NA	NA	1	0	1
Rapgef3	NA	NA	NA	NA	NA	0.400351	NA	NA	NA	NA	NA	NA	1	0	1
Mapk1ip1l	NA	NA	NA	NA	NA	0.454969	NA	NA	NA	NA	NA	NA	1	0	1
Gli3	NA	NA	NA	NA	NA	0.713948	NA	NA	NA	NA	NA	NA	1	0	1
Lama3	NA	NA	NA	NA	NA	0.653475	NA	NA	NA	NA	NA	NA	1	0	1
Fnbp1	NA	NA	NA	NA	NA	0.29266	NA	NA	NA	NA	NA	NA	1	0	1
Sorcs2	NA	NA	NA	NA	NA	0.164932	NA	NA	NA	NA	NA	NA	1	0	1
Stat5b	NA	NA	NA	NA	NA	0.295467	NA	NA	NA	NA	NA	NA	1	0	1
Frmd6	NA	NA	NA	NA	NA	0.167195	NA	NA	NA	NA	NA	NA	1	0	1
Snph	NA	NA	NA	NA	NA	0.246834	NA	NA	NA	NA	NA	NA	1	0	1
Acot6	NA	NA	NA	NA	NA	0.602283	NA	NA	NA	NA	NA	NA	1	0	1
Astn2	NA	NA	NA	NA	NA	0.207425	NA	NA	NA	NA	NA	NA	1	0	1
Alcam	NA	NA	NA	NA	NA	0.425684	NA	NA	NA	NA	NA	NA	1	0	1
Lca5	NA	NA	NA	NA	NA	0.13522	NA	NA	NA	NA	NA	NA	1	0	1
Zranb3	NA	NA	NA	NA	NA	0.524733	NA	NA	NA	NA	NA	NA	1	0	1
Gm3294	NA	NA	NA	NA	NA	0.175968	NA	NA	NA	NA	NA	NA	1	0	1
Ttll9	NA	NA	NA	NA	NA	0.172224	NA	NA	NA	NA	NA	NA	1	0	1
Tbc1d31	NA	NA	NA	NA	NA	0.443144	NA	NA	NA	NA	NA	NA	1	0	1
Sox5	NA	NA	NA	NA	NA	0.356509	NA	NA	NA	NA	NA	NA	1	0	1
Hnrnpll	NA	NA	NA	NA	NA	0.3952	NA	NA	NA	NA	NA	NA	1	0	1
Rhbdd1	NA	NA	NA	NA	NA	0.506306	NA	NA	NA	NA	NA	NA	1	0	1
Fat3	NA	NA	NA	NA	NA	0.508555	NA	NA	NA	NA	NA	NA	1	0	1
Mapk10	NA	NA	NA	NA	NA	0.196663	NA	NA	NA	NA	NA	NA	1	0	1
Cyp4v3	NA	NA	NA	NA	NA	0.17905	NA	NA	NA	NA	NA	NA	1	0	1
Zbtb7c	NA	NA	NA	NA	NA	0.672499	NA	NA	NA	NA	NA	NA	1	0	1
Osbpl3	NA	NA	NA	NA	NA	0.250453	NA	NA	NA	NA	NA	NA	1	0	1
Gm49896	NA	NA	NA	NA	NA	0.612667	NA	NA	NA	NA	NA	NA	1	0	1
Miga1	NA	NA	NA	NA	NA	0.345742	NA	NA	NA	NA	NA	NA	1	0	1
Uvssa	NA	NA	NA	NA	NA	0.117469	NA	NA	NA	NA	NA	NA	1	0	1
Aox1	NA	NA	NA	NA	NA	0.357428	NA	NA	NA	NA	NA	NA	1	0	1
Tmem87a	NA	NA	NA	NA	NA	0.645486	NA	NA	NA	NA	NA	NA	1	0	1
Ehbp1	NA	NA	NA	NA	NA	0.191383	NA	NA	NA	NA	NA	NA	1	0	1
D130043K22Rik	NA	NA	NA	NA	NA	0.274426	NA	NA	NA	NA	NA	NA	1	0	1
Ppp1r42	NA	NA	NA	NA	NA	0.238168	NA	NA	NA	NA	NA	NA	1	0	1
Napg	NA	NA	NA	NA	NA	0.186178	NA	NA	NA	NA	NA	NA	1	0	1
Lrrc6	NA	NA	NA	NA	NA	0.131252	NA	NA	NA	NA	NA	NA	1	0	1
Fam214a	NA	NA	NA	NA	NA	0.19535	NA	NA	NA	NA	NA	NA	1	0	1
Pcgf5	NA	NA	NA	NA	NA	0.138518	NA	NA	NA	NA	NA	NA	1	0	1
Lipc	NA	NA	NA	NA	NA	0.510713	NA	NA	NA	NA	NA	NA	1	0	1
Nmt2	NA	NA	NA	NA	NA	0.415188	NA	NA	NA	NA	NA	NA	1	0	1
Nr4a1	NA	NA	NA	NA	NA	1.27539	NA	NA	NA	NA	NA	NA	1	0	1
Nfatc2	NA	NA	NA	NA	NA	0.208365	NA	NA	NA	NA	NA	NA	1	0	1
Unc80	NA	NA	NA	NA	NA	0.149871	NA	NA	NA	NA	NA	NA	1	0	1
Lman2l	NA	NA	NA	NA	NA	0.546809	NA	NA	NA	NA	NA	NA	1	0	1
Jazf1	NA	NA	NA	NA	NA	0.560832	NA	NA	NA	NA	NA	NA	1	0	1
Trerf1	NA	NA	NA	NA	NA	0.336362	NA	NA	NA	NA	NA	NA	1	0	1
Sh3rf3	NA	NA	NA	NA	NA	0.487203	NA	NA	NA	NA	NA	NA	1	0	1
Ccdc3	NA	NA	NA	NA	NA	0.288132	NA	NA	NA	NA	NA	NA	1	0	1
Sncaip	NA	NA	NA	NA	NA	0.420272	NA	NA	NA	NA	NA	NA	1	0	1
Ccdc150	NA	NA	NA	NA	NA	0.210448	NA	NA	NA	NA	NA	NA	1	0	1
Slc39a11	NA	NA	NA	NA	NA	0.599015	NA	NA	NA	NA	NA	NA	1	0	1
Airn	NA	NA	NA	NA	NA	0.151221	NA	NA	NA	NA	NA	NA	1	0	1
Synpo2	NA	NA	NA	NA	NA	0.141971	NA	NA	NA	NA	NA	NA	1	0	1
Arhgef33	NA	NA	NA	NA	NA	0.120378	NA	NA	NA	NA	NA	NA	1	0	1
Zc3h12b	NA	NA	NA	NA	NA	0.149167	NA	NA	NA	NA	NA	NA	1	0	1
Tiparp	NA	NA	NA	NA	NA	0.464467	NA	NA	NA	NA	NA	NA	1	0	1
Cep95	NA	NA	NA	NA	NA	0.135083	NA	NA	NA	NA	NA	NA	1	0	1
1110019D14Rik	NA	NA	NA	NA	NA	0.196487	NA	NA	NA	NA	NA	NA	1	0	1
Zfp956	NA	NA	NA	NA	NA	0.306475	NA	NA	NA	NA	NA	NA	1	0	1
Eya4	NA	NA	NA	NA	NA	0.786645	NA	NA	NA	NA	NA	NA	1	0	1
Lrguk	NA	NA	NA	NA	NA	0.213048	NA	NA	NA	NA	NA	NA	1	0	1
Phka2	NA	NA	NA	NA	NA	0.191961	NA	NA	NA	NA	NA	NA	1	0	1
Fam126a	NA	NA	NA	NA	NA	0.274836	NA	NA	NA	NA	NA	NA	1	0	1
Creb5	NA	NA	NA	NA	NA	0.262307	NA	NA	NA	NA	NA	NA	1	0	1
Iqsec2	NA	NA	NA	NA	NA	0.262828	NA	NA	NA	NA	NA	NA	1	0	1
Sipa1l1	NA	NA	NA	NA	NA	0.662663	NA	NA	NA	NA	NA	NA	1	0	1
Cd109	NA	NA	NA	NA	NA	0.110685	NA	NA	NA	NA	NA	NA	1	0	1
Wdfy2	NA	NA	NA	NA	NA	0.182422	NA	NA	NA	NA	NA	NA	1	0	1
Fhod3	NA	NA	NA	NA	NA	0.443553	NA	NA	NA	NA	NA	NA	1	0	1
Amz2	NA	NA	NA	NA	NA	0.106232	NA	NA	NA	NA	NA	NA	1	0	1
Ccdc57	NA	NA	NA	NA	NA	0.214005	NA	NA	NA	NA	NA	NA	1	0	1
Dglucy	NA	NA	NA	NA	NA	0.123205	NA	NA	NA	NA	NA	NA	1	0	1
Efhc2	NA	NA	NA	NA	NA	0.133765	NA	NA	NA	NA	NA	NA	1	0	1
A630089N07Rik	NA	NA	NA	NA	NA	0.504463	NA	NA	NA	NA	NA	NA	1	0	1
Klkb1	NA	NA	NA	NA	NA	0.34617	NA	NA	NA	NA	NA	NA	1	0	1
Cacul1	NA	NA	NA	NA	NA	0.369871	NA	NA	NA	NA	NA	NA	1	0	1
Ptprn2	NA	NA	NA	NA	NA	0.404602	NA	NA	NA	NA	NA	NA	1	0	1
Slc25a21	NA	NA	NA	NA	NA	0.407136	NA	NA	NA	NA	NA	NA	1	0	1
Cers6	NA	NA	NA	NA	NA	0.418595	NA	NA	NA	NA	NA	NA	1	0	1
Fam107b	NA	NA	NA	NA	NA	0.141564	NA	NA	NA	NA	NA	NA	1	0	1
Dus2	NA	NA	NA	NA	NA	0.337239	NA	NA	NA	NA	NA	NA	1	0	1
Kank1	NA	NA	NA	NA	NA	0.454513	NA	NA	NA	NA	NA	NA	1	0	1
Slc4a4	NA	NA	NA	NA	NA	0.364829	NA	NA	NA	NA	NA	NA	1	0	1
Nphp4	NA	NA	NA	NA	NA	0.289997	NA	NA	NA	NA	NA	NA	1	0	1
Pgpep1l	NA	NA	NA	NA	NA	0.472707	NA	NA	NA	NA	NA	NA	1	0	1
Pakap	NA	NA	NA	NA	NA	0.151176	NA	NA	NA	NA	NA	NA	1	0	1
Cdkl3	NA	NA	NA	NA	NA	0.201393	NA	NA	NA	NA	NA	NA	1	0	1
Pamr1	NA	NA	NA	NA	NA	0.167907	NA	NA	NA	NA	NA	NA	1	0	1
Ccdc15	NA	NA	NA	NA	NA	0.100369	NA	NA	NA	NA	NA	NA	1	0	1
Gm14963	NA	NA	NA	NA	NA	0.305811	NA	NA	NA	NA	NA	NA	1	0	1
Iffo2	NA	NA	NA	NA	NA	0.292388	NA	NA	NA	NA	NA	NA	1	0	1
Efcab6	NA	NA	NA	NA	NA	0.114589	NA	NA	NA	NA	NA	NA	1	0	1
Banp	NA	NA	NA	NA	NA	0.169225	NA	NA	NA	NA	NA	NA	1	0	1
Klhl32	NA	NA	NA	NA	NA	0.420786	NA	NA	NA	NA	NA	NA	1	0	1
Cnksr2	NA	NA	NA	NA	NA	0.108478	NA	NA	NA	NA	NA	NA	1	0	1
Nrg1	NA	NA	NA	NA	NA	0.576481	NA	NA	NA	NA	NA	NA	1	0	1
Lims1	NA	NA	NA	NA	NA	0.168779	NA	NA	NA	NA	NA	NA	1	0	1
Gabrb1	NA	NA	NA	NA	NA	0.501708	NA	NA	NA	NA	NA	NA	1	0	1
Ankrd11	NA	NA	NA	NA	NA	0.16342	NA	NA	NA	NA	NA	NA	1	0	1
Adgrl1	NA	NA	NA	NA	NA	0.322146	NA	NA	NA	NA	NA	NA	1	0	1
Lrrfip2	NA	NA	NA	NA	NA	0.26042	NA	NA	NA	NA	NA	NA	1	0	1
Sctr	NA	NA	NA	NA	NA	0.45698	NA	NA	NA	NA	NA	NA	1	0	1
Rad51b	NA	NA	NA	NA	NA	0.242586	NA	NA	NA	NA	NA	NA	1	0	1
Arhgap15	NA	NA	NA	NA	NA	NA	1.83322	NA	NA	NA	NA	NA	1	0	1
Cybb	NA	NA	NA	NA	NA	NA	5.84626	NA	NA	NA	NA	NA	1	0	1
Ms4a7	NA	NA	NA	NA	NA	NA	5.04648	NA	NA	NA	NA	NA	1	0	1
Rgs1	NA	NA	NA	NA	NA	NA	5.49466	NA	NA	NA	NA	NA	1	0	1
Adgb	NA	NA	NA	NA	NA	NA	4.75253	NA	NA	NA	NA	NA	1	0	1
Spi1	NA	NA	NA	NA	NA	NA	4.00282	NA	NA	NA	NA	NA	1	0	1
Ifi207	NA	NA	NA	NA	NA	NA	4.25451	NA	NA	NA	NA	NA	1	0	1
Ms4a6c	NA	NA	NA	NA	NA	NA	4.07476	NA	NA	NA	NA	NA	1	0	1
Rnf150	NA	NA	NA	NA	NA	NA	3.50104	NA	NA	NA	NA	NA	1	0	1
Tent5c	NA	NA	NA	NA	NA	NA	3.87759	NA	NA	NA	NA	NA	1	0	1
Mndal	NA	NA	NA	NA	NA	NA	3.49613	NA	NA	NA	NA	NA	1	0	1
Map3k1	NA	NA	NA	NA	NA	NA	3.43364	NA	NA	NA	NA	NA	1	0	1
Tpk1	NA	NA	NA	NA	NA	NA	3.63163	NA	NA	NA	NA	NA	1	0	1
Tbc1d8	NA	NA	NA	NA	NA	NA	3.36501	NA	NA	NA	NA	NA	1	0	1
Clec12a	NA	NA	NA	NA	NA	NA	3.82439	NA	NA	NA	NA	NA	1	0	1
Ms4a6d	NA	NA	NA	NA	NA	NA	3.27198	NA	NA	NA	NA	NA	1	0	1
Grn	NA	NA	NA	NA	NA	NA	0.882716	NA	NA	NA	NA	NA	1	0	1
Ifi203	NA	NA	NA	NA	NA	NA	3.62885	NA	NA	NA	NA	NA	1	0	1
Ccr1	NA	NA	NA	NA	NA	NA	3.43065	NA	NA	NA	NA	NA	1	0	1
Slc16a10	NA	NA	NA	NA	NA	NA	3.45149	NA	NA	NA	NA	NA	1	0	1
Coq10b	NA	NA	NA	NA	NA	NA	3.47924	NA	NA	NA	NA	NA	1	0	1
Neurl3	NA	NA	NA	NA	NA	NA	3.37911	NA	NA	NA	NA	NA	1	0	1
Pld1	NA	NA	NA	NA	NA	NA	NA	0.278523	NA	NA	NA	NA	1	0	1
Gca	NA	NA	NA	NA	NA	NA	NA	0.226999	NA	NA	NA	NA	1	0	1
Sin3b	NA	NA	NA	NA	NA	NA	NA	0.2933	NA	NA	NA	NA	1	0	1
Agtpbp1	NA	NA	NA	NA	NA	NA	NA	0.139226	NA	NA	NA	NA	1	0	1
Skap2	NA	NA	NA	NA	NA	NA	NA	0.177496	NA	NA	NA	NA	1	0	1
Kif3c	NA	NA	NA	NA	NA	NA	NA	0.163905	NA	NA	NA	NA	1	0	1
Depdc5	NA	NA	NA	NA	NA	NA	NA	0.149088	NA	NA	NA	NA	1	0	1
Nkain1	NA	NA	NA	NA	NA	NA	NA	0.140054	NA	NA	NA	NA	1	0	1
Tsc1	NA	NA	NA	NA	NA	NA	NA	0.17824	NA	NA	NA	NA	1	0	1
Gm19500	NA	NA	NA	NA	NA	NA	NA	0.288132	NA	NA	NA	NA	1	0	1
Ptbp2	NA	NA	NA	NA	NA	NA	NA	0.142277	NA	NA	NA	NA	1	0	1
Parp8	NA	NA	NA	NA	NA	NA	NA	0.566351	NA	NA	NA	NA	1	0	1
Pgbd5	NA	NA	NA	NA	NA	NA	NA	0.109726	NA	NA	NA	NA	1	0	1
Cblb	NA	NA	NA	NA	NA	NA	NA	0.430938	NA	NA	NA	NA	1	0	1
Chd7	NA	NA	NA	NA	NA	NA	NA	0.160655	NA	NA	NA	NA	1	0	1
Dcaf5	NA	NA	NA	NA	NA	NA	NA	0.231405	NA	NA	NA	NA	1	0	1
Mboat2	NA	NA	NA	NA	NA	NA	NA	0.245316	NA	NA	NA	NA	1	0	1
Spast	NA	NA	NA	NA	NA	NA	NA	0.142118	NA	NA	NA	NA	1	0	1
Rffl	NA	NA	NA	NA	NA	NA	NA	0.255472	NA	NA	NA	NA	1	0	1
Map6	NA	NA	NA	NA	NA	NA	NA	0.338211	NA	NA	NA	NA	1	0	1
Gm36855	NA	NA	NA	NA	NA	NA	NA	0.306261	NA	NA	NA	NA	1	0	1
Rhpn2	NA	NA	NA	NA	NA	NA	NA	0.133098	NA	NA	NA	NA	1	0	1
Yars	NA	NA	NA	NA	NA	NA	NA	0.131639	NA	NA	NA	NA	1	0	1
Ablim2	NA	NA	NA	NA	NA	NA	NA	0.110649	NA	NA	NA	NA	1	0	1
Phc1	NA	NA	NA	NA	NA	NA	NA	0.155617	NA	NA	NA	NA	1	0	1
Tom1	NA	NA	NA	NA	NA	NA	NA	0.102198	NA	NA	NA	NA	1	0	1
Prex1	NA	NA	NA	NA	NA	NA	NA	0.3293	NA	NA	NA	NA	1	0	1
Osbp2	NA	NA	NA	NA	NA	NA	NA	0.195181	NA	NA	NA	NA	1	0	1
Wipf1	NA	NA	NA	NA	NA	NA	NA	0.163693	NA	NA	NA	NA	1	0	1
Ppp1r12b	NA	NA	NA	NA	NA	NA	NA	0.356497	NA	NA	NA	NA	1	0	1
Fem1c	NA	NA	NA	NA	NA	NA	NA	0.275351	NA	NA	NA	NA	1	0	1
Sh3tc2	NA	NA	NA	NA	NA	NA	NA	0.323911	NA	NA	NA	NA	1	0	1
Pex1	NA	NA	NA	NA	NA	NA	NA	0.4369	NA	NA	NA	NA	1	0	1
P2rx4	NA	NA	NA	NA	NA	NA	NA	0.123894	NA	NA	NA	NA	1	0	1
Adam19	NA	NA	NA	NA	NA	NA	NA	0.28289	NA	NA	NA	NA	1	0	1
Tjap1	NA	NA	NA	NA	NA	NA	NA	0.121358	NA	NA	NA	NA	1	0	1
Mir99ahg	NA	NA	NA	NA	NA	NA	NA	0.19222	NA	NA	NA	NA	1	0	1
Iars2	NA	NA	NA	NA	NA	NA	NA	0.249375	NA	NA	NA	NA	1	0	1
Akap6	NA	NA	NA	NA	NA	NA	NA	0.139009	NA	NA	NA	NA	1	0	1
Gmeb2	NA	NA	NA	NA	NA	NA	NA	0.134308	NA	NA	NA	NA	1	0	1
Pik3cb	NA	NA	NA	NA	NA	NA	NA	0.290148	NA	NA	NA	NA	1	0	1
Zmat1	NA	NA	NA	NA	NA	NA	NA	0.392188	NA	NA	NA	NA	1	0	1
Chst8	NA	NA	NA	NA	NA	NA	NA	0.199826	NA	NA	NA	NA	1	0	1
Prima1	NA	NA	NA	NA	NA	NA	NA	0.256763	NA	NA	NA	NA	1	0	1
Coq10a	NA	NA	NA	NA	NA	NA	NA	0.277239	NA	NA	NA	NA	1	0	1
Zfp512	NA	NA	NA	NA	NA	NA	NA	0.105648	NA	NA	NA	NA	1	0	1
Depdc7	NA	NA	NA	NA	NA	NA	NA	0.310296	NA	NA	NA	NA	1	0	1
Ptcd3	NA	NA	NA	NA	NA	NA	NA	0.131213	NA	NA	NA	NA	1	0	1
C2cd5	NA	NA	NA	NA	NA	NA	NA	0.151989	NA	NA	NA	NA	1	0	1
A230001M10Rik	NA	NA	NA	NA	NA	NA	NA	0.152642	NA	NA	NA	NA	1	0	1
Rftn1	NA	NA	NA	NA	NA	NA	NA	0.151935	NA	NA	NA	NA	1	0	1
Abtb2	NA	NA	NA	NA	NA	NA	NA	0.40217	NA	NA	NA	NA	1	0	1
Pvt1	NA	NA	NA	NA	NA	NA	NA	0.411455	NA	NA	NA	NA	1	0	1
Naa16	NA	NA	NA	NA	NA	NA	NA	0.202377	NA	NA	NA	NA	1	0	1
Ppp6r2	NA	NA	NA	NA	NA	NA	NA	0.288342	NA	NA	NA	NA	1	0	1
Secisbp2	NA	NA	NA	NA	NA	NA	NA	0.237137	NA	NA	NA	NA	1	0	1
Ppip5k2	NA	NA	NA	NA	NA	NA	NA	0.110797	NA	NA	NA	NA	1	0	1
Pknox1	NA	NA	NA	NA	NA	NA	NA	0.231113	NA	NA	NA	NA	1	0	1
Abhd2	NA	NA	NA	NA	NA	NA	NA	0.577052	NA	NA	NA	NA	1	0	1
Ston2	NA	NA	NA	NA	NA	NA	NA	0.359938	NA	NA	NA	NA	1	0	1
Cog3	NA	NA	NA	NA	NA	NA	NA	0.172837	NA	NA	NA	NA	1	0	1
Sgip1	NA	NA	NA	NA	NA	NA	NA	0.439312	NA	NA	NA	NA	1	0	1
Kif5c	NA	NA	NA	NA	NA	NA	NA	0.239137	NA	NA	NA	NA	1	0	1
Med27	NA	NA	NA	NA	NA	NA	NA	0.277263	NA	NA	NA	NA	1	0	1
Edem3	NA	NA	NA	NA	NA	NA	NA	0.258912	NA	NA	NA	NA	1	0	1
Abcb10	NA	NA	NA	NA	NA	NA	NA	0.145213	NA	NA	NA	NA	1	0	1
Dmxl2	NA	NA	NA	NA	NA	NA	NA	0.144431	NA	NA	NA	NA	1	0	1
Ubap2	NA	NA	NA	NA	NA	NA	NA	0.121179	NA	NA	NA	NA	1	0	1
Lmf1	NA	NA	NA	NA	NA	NA	NA	0.225663	NA	NA	NA	NA	1	0	1
Mbtps1	NA	NA	NA	NA	NA	NA	NA	0.23395	NA	NA	NA	NA	1	0	1
Cyp27a1	NA	NA	NA	NA	NA	NA	NA	0.101327	NA	NA	NA	NA	1	0	1
Ddx10	NA	NA	NA	NA	NA	NA	NA	0.177315	NA	NA	NA	NA	1	0	1
Tcerg1	NA	NA	NA	NA	NA	NA	NA	0.244398	NA	NA	NA	NA	1	0	1
Ninj2	NA	NA	NA	NA	NA	NA	NA	0.187875	NA	NA	NA	NA	1	0	1
Gdpd5	NA	NA	NA	NA	NA	NA	NA	0.359239	NA	NA	NA	NA	1	0	1
Adgrv1	NA	NA	NA	NA	NA	NA	NA	0.165725	NA	NA	NA	NA	1	0	1
Btrc	NA	NA	NA	NA	NA	NA	NA	0.213638	NA	NA	NA	NA	1	0	1
1700025G04Rik	NA	NA	NA	NA	NA	NA	NA	0.181585	NA	NA	NA	NA	1	0	1
Clcn6	NA	NA	NA	NA	NA	NA	NA	0.140985	NA	NA	NA	NA	1	0	1
Opcml	NA	NA	NA	NA	NA	NA	NA	0.251723	NA	NA	NA	NA	1	0	1
Plaa	NA	NA	NA	NA	NA	NA	NA	0.131636	NA	NA	NA	NA	1	0	1
Pla2g3	NA	NA	NA	NA	NA	NA	NA	0.214852	NA	NA	NA	NA	1	0	1
Ptpre	NA	NA	NA	NA	NA	NA	NA	0.243523	NA	NA	NA	NA	1	0	1
Ssbp2	NA	NA	NA	NA	NA	NA	NA	0.356773	NA	NA	NA	NA	1	0	1
Gm28320	NA	NA	NA	NA	NA	NA	NA	0.442077	NA	NA	NA	NA	1	0	1
Supt3	NA	NA	NA	NA	NA	NA	NA	0.237396	NA	NA	NA	NA	1	0	1
Ikzf2	NA	NA	NA	NA	NA	NA	NA	0.124676	NA	NA	NA	NA	1	0	1
Timmdc1	NA	NA	NA	NA	NA	NA	NA	0.269485	NA	NA	NA	NA	1	0	1
Extl3	NA	NA	NA	NA	NA	NA	NA	0.428597	NA	NA	NA	NA	1	0	1
Gpatch2l	NA	NA	NA	NA	NA	NA	NA	0.125866	NA	NA	NA	NA	1	0	1
5330434G04Rik	NA	NA	NA	NA	NA	NA	NA	0.258092	NA	NA	NA	NA	1	0	1
Sorcs3	NA	NA	NA	NA	NA	NA	NA	0.339986	NA	NA	NA	NA	1	0	1
Eml5	NA	NA	NA	NA	NA	NA	NA	0.324076	NA	NA	NA	NA	1	0	1
Gm16759	NA	NA	NA	NA	NA	NA	NA	0.434913	NA	NA	NA	NA	1	0	1
A330015K06Rik	NA	NA	NA	NA	NA	NA	NA	0.21355	NA	NA	NA	NA	1	0	1
Eefsec	NA	NA	NA	NA	NA	NA	NA	0.368145	NA	NA	NA	NA	1	0	1
Bcat1	NA	NA	NA	NA	NA	NA	NA	0.156533	NA	NA	NA	NA	1	0	1
Fgd3	NA	NA	NA	NA	NA	NA	NA	0.242594	NA	NA	NA	NA	1	0	1
Sfmbt1	NA	NA	NA	NA	NA	NA	NA	0.410136	NA	NA	NA	NA	1	0	1
Fbxw4	NA	NA	NA	NA	NA	NA	NA	0.232917	NA	NA	NA	NA	1	0	1
Tmem132b	NA	NA	NA	NA	NA	NA	NA	0.245984	NA	NA	NA	NA	1	0	1
Epb41l4b	NA	NA	NA	NA	NA	NA	NA	0.26706	NA	NA	NA	NA	1	0	1
Slc35a3	NA	NA	NA	NA	NA	NA	NA	0.162619	NA	NA	NA	NA	1	0	1
Dgki	NA	NA	NA	NA	NA	NA	NA	0.209824	NA	NA	NA	NA	1	0	1
Xkr6	NA	NA	NA	NA	NA	NA	NA	0.13049	NA	NA	NA	NA	1	0	1
Slc38a6	NA	NA	NA	NA	NA	NA	NA	0.228213	NA	NA	NA	NA	1	0	1
Cdh10	NA	NA	NA	NA	NA	NA	NA	0.220586	NA	NA	NA	NA	1	0	1
Maml3	NA	NA	NA	NA	NA	NA	NA	0.823757	NA	NA	NA	NA	1	0	1
Ephb1	NA	NA	NA	NA	NA	NA	NA	0.214538	NA	NA	NA	NA	1	0	1
Tmem132d	NA	NA	NA	NA	NA	NA	NA	0.385115	NA	NA	NA	NA	1	0	1
D7Ertd443e	NA	NA	NA	NA	NA	NA	NA	0.182601	NA	NA	NA	NA	1	0	1
Enox1	NA	NA	NA	NA	NA	NA	NA	0.180246	NA	NA	NA	NA	1	0	1
Tesk2	NA	NA	NA	NA	NA	NA	NA	0.261199	NA	NA	NA	NA	1	0	1
Xkr4	NA	NA	NA	NA	NA	NA	NA	0.133743	NA	NA	NA	NA	1	0	1
Ttc17	NA	NA	NA	NA	NA	NA	NA	0.193481	NA	NA	NA	NA	1	0	1
Eya3	NA	NA	NA	NA	NA	NA	NA	0.167459	NA	NA	NA	NA	1	0	1
Sybu	NA	NA	NA	NA	NA	NA	NA	0.10497	NA	NA	NA	NA	1	0	1
BC052040	NA	NA	NA	NA	NA	NA	NA	0.300041	NA	NA	NA	NA	1	0	1
Nkx2-2os	NA	NA	NA	NA	NA	NA	NA	0.285885	NA	NA	NA	NA	1	0	1
Gm45345	NA	NA	NA	NA	NA	NA	NA	0.253578	NA	NA	NA	NA	1	0	1
Dcc	NA	NA	NA	NA	NA	NA	NA	0.366596	NA	NA	NA	NA	1	0	1
Gm49969	NA	NA	NA	NA	NA	NA	NA	0.19021	NA	NA	NA	NA	1	0	1
Gm13483	NA	NA	NA	NA	NA	NA	NA	0.353695	NA	NA	NA	NA	1	0	1
Gpd2	NA	NA	NA	NA	NA	NA	NA	0.115845	NA	NA	NA	NA	1	0	1
Dscaml1	NA	NA	NA	NA	NA	NA	NA	0.254207	NA	NA	NA	NA	1	0	1
Fkbp5	NA	NA	NA	NA	NA	NA	NA	0.245076	NA	NA	NA	NA	1	0	1
Zfhx4	NA	NA	NA	NA	NA	NA	NA	0.303533	NA	NA	NA	NA	1	0	1
2410021H03Rik	NA	NA	NA	NA	NA	NA	NA	0.217461	NA	NA	NA	NA	1	0	1
Kcnq3	NA	NA	NA	NA	NA	NA	NA	0.187036	NA	NA	NA	NA	1	0	1
Gm26673	NA	NA	NA	NA	NA	NA	NA	0.311951	NA	NA	NA	NA	1	0	1
Gm48249	NA	NA	NA	NA	NA	NA	NA	0.129953	NA	NA	NA	NA	1	0	1
Slc24a2	NA	NA	NA	NA	NA	NA	NA	0.226282	NA	NA	NA	NA	1	0	1
Ptpn4	NA	NA	NA	NA	NA	NA	NA	0.174289	NA	NA	NA	NA	1	0	1
9330111N05Rik	NA	NA	NA	NA	NA	NA	NA	0.62323	NA	NA	NA	NA	1	0	1
Pak7	NA	NA	NA	NA	NA	NA	NA	0.133151	NA	NA	NA	NA	1	0	1
Tmem178b	NA	NA	NA	NA	NA	NA	NA	0.124105	NA	NA	NA	NA	1	0	1
Ncam2	NA	NA	NA	NA	NA	NA	NA	0.150483	NA	NA	NA	NA	1	0	1
Sorcs1	NA	NA	NA	NA	NA	NA	NA	0.113327	NA	NA	NA	NA	1	0	1
Dmd	NA	NA	NA	NA	NA	NA	NA	0.137364	NA	NA	NA	NA	1	0	1
Spock1	NA	NA	NA	NA	NA	NA	NA	0.276939	NA	NA	NA	NA	1	0	1
Cdh20	NA	NA	NA	NA	NA	NA	NA	0.274179	NA	NA	NA	NA	1	0	1
Robo1	NA	NA	NA	NA	NA	NA	NA	0.194406	NA	NA	NA	NA	1	0	1
Hecw2	NA	NA	NA	NA	NA	NA	NA	0.103381	NA	NA	NA	NA	1	0	1
Pcdh15	NA	NA	NA	NA	NA	NA	NA	0.351436	NA	NA	NA	NA	1	0	1
Lsamp	NA	NA	NA	NA	NA	NA	NA	0.214571	NA	NA	NA	NA	1	0	1
St18	NA	NA	NA	NA	NA	NA	NA	0.221719	NA	NA	NA	NA	1	0	1
Lrrc4c	NA	NA	NA	NA	NA	NA	NA	0.144718	NA	NA	NA	NA	1	0	1
Mdga2	NA	NA	NA	NA	NA	NA	NA	0.105184	NA	NA	NA	NA	1	0	1
Cntn3	NA	NA	NA	NA	NA	NA	NA	0.172685	NA	NA	NA	NA	1	0	1
Ctnna3	NA	NA	NA	NA	NA	NA	NA	0.271939	NA	NA	NA	NA	1	0	1
Tmeff2	NA	NA	NA	NA	NA	NA	NA	0.155898	NA	NA	NA	NA	1	0	1
Ndrg3	NA	NA	NA	NA	NA	NA	NA	NA	0.536727	NA	NA	NA	1	0	1
4930447N08Rik	NA	NA	NA	NA	NA	NA	NA	NA	1.87278	NA	NA	NA	1	0	1
Gm6260	NA	NA	NA	NA	NA	NA	NA	NA	0.914687	NA	NA	NA	1	0	1
Erc2	NA	NA	NA	NA	NA	NA	NA	NA	0.844972	NA	NA	NA	1	0	1
Tfcp2l1	NA	NA	NA	NA	NA	NA	NA	NA	1.32886	NA	NA	NA	1	0	1
Pde10a	NA	NA	NA	NA	NA	NA	NA	NA	2.2733	NA	NA	NA	1	0	1
Bche	NA	NA	NA	NA	NA	NA	NA	NA	0.374848	NA	NA	NA	1	0	1
C1galt1c1	NA	NA	NA	NA	NA	NA	NA	NA	0.200189	NA	NA	NA	1	0	1
Antxr1	NA	NA	NA	NA	NA	NA	NA	NA	0.709334	NA	NA	NA	1	0	1
Col25a1	NA	NA	NA	NA	NA	NA	NA	NA	0.453954	NA	NA	NA	1	0	1
Cemip2	NA	NA	NA	NA	NA	NA	NA	NA	0.28387	NA	NA	NA	1	0	1
Cryl1	NA	NA	NA	NA	NA	NA	NA	NA	0.744601	NA	NA	NA	1	0	1
Gria4	NA	NA	NA	NA	NA	NA	NA	NA	0.997631	NA	NA	NA	1	0	1
Itgbl1	NA	NA	NA	NA	NA	NA	NA	NA	0.90768	NA	NA	NA	1	0	1
Gpc5	NA	NA	NA	NA	NA	NA	NA	NA	1.92107	NA	NA	NA	1	0	1
Vkorc1l1	NA	NA	NA	NA	NA	NA	NA	NA	0.802862	NA	NA	NA	1	0	1
Adgrl4	NA	NA	NA	NA	NA	NA	NA	NA	NA	NA	5.88733	NA	1	0	1
Cyyr1	NA	NA	NA	NA	NA	NA	NA	NA	NA	NA	3.36897	NA	1	0	1
Erg	NA	NA	NA	NA	NA	NA	NA	NA	NA	NA	3.69711	NA	1	0	1
Adgrf5	NA	NA	NA	NA	NA	NA	NA	NA	NA	NA	2.25044	NA	1	0	1
Kitl	NA	NA	NA	NA	NA	NA	NA	NA	NA	NA	2.02158	NA	1	0	1
Tek	NA	NA	NA	NA	NA	NA	NA	NA	NA	NA	2.93136	NA	1	0	1
Cdk19	NA	NA	NA	NA	NA	NA	NA	NA	NA	NA	2.28563	NA	1	0	1
Git2	NA	NA	NA	NA	NA	NA	NA	NA	NA	NA	1.52485	NA	1	0	1
Dcaf7	NA	NA	NA	NA	NA	NA	NA	NA	NA	NA	1.50782	NA	1	0	1
Xdh	NA	NA	NA	NA	NA	NA	NA	NA	NA	NA	0.520466	NA	1	0	1
Eogt	NA	NA	NA	NA	NA	NA	NA	NA	NA	NA	1.66366	NA	1	0	1
Map3k5	NA	NA	NA	NA	NA	NA	NA	NA	NA	NA	1.54618	NA	1	0	1
Lrrc8c	NA	NA	NA	NA	NA	NA	NA	NA	NA	NA	1.42963	NA	1	0	1
Rasgrp3	NA	NA	NA	NA	NA	NA	NA	NA	NA	NA	0.810918	NA	1	0	1
Prkd3	NA	NA	NA	NA	NA	NA	NA	NA	NA	NA	1.45993	NA	1	0	1
Gm32250	NA	NA	NA	NA	NA	NA	NA	NA	NA	NA	1.18771	NA	1	0	1
Mylk	NA	NA	NA	NA	NA	NA	NA	NA	NA	NA	0.306406	NA	1	0	1
Gpsm1	NA	NA	NA	NA	NA	NA	NA	NA	NA	NA	0.712542	NA	1	0	1
Kif1c	NA	NA	NA	NA	NA	NA	NA	NA	NA	NA	1.09201	NA	1	0	1
Ackr3	NA	NA	NA	NA	NA	NA	NA	NA	NA	NA	0.284831	NA	1	0	1
Srgap3	NA	NA	NA	NA	NA	NA	NA	NA	NA	NA	NA	0.552626	1	0	1
Ctns	NA	NA	NA	NA	NA	NA	NA	NA	NA	NA	NA	0.245911	1	0	1
Col23a1	NA	NA	NA	NA	NA	NA	NA	NA	NA	NA	NA	0.727264	1	0	1
Nmnat2	NA	NA	NA	NA	NA	NA	NA	NA	NA	NA	NA	0.671319	1	0	1
Homer1	NA	NA	NA	NA	NA	NA	NA	NA	NA	NA	NA	0.879437	1	0	1
Gpsm2	NA	NA	NA	NA	NA	NA	NA	NA	NA	NA	NA	0.188655	1	0	1
Gabrg3	NA	NA	NA	NA	NA	NA	NA	NA	NA	NA	NA	1.08238	1	0	1
Zfp536	NA	NA	NA	NA	NA	NA	NA	NA	NA	NA	NA	0.332853	1	0	1
Nalcn	NA	NA	NA	NA	NA	NA	NA	NA	NA	NA	NA	0.501862	1	0	1
Igf1	NA	NA	NA	NA	NA	NA	NA	NA	NA	NA	NA	1.06963	1	0	1
Epha7	NA	NA	NA	NA	NA	NA	NA	NA	NA	NA	NA	0.762275	1	0	1
Flrt3	NA	NA	NA	NA	NA	NA	NA	NA	NA	NA	NA	0.791958	1	0	1
Trim9	NA	NA	NA	NA	NA	NA	NA	NA	NA	NA	NA	0.896014	1	0	1
Heyl	NA	NA	NA	NA	NA	NA	NA	NA	NA	NA	NA	0.604348	1	0	1
Hmgcll1	NA	NA	NA	NA	NA	NA	NA	NA	NA	NA	NA	0.353552	1	0	1
Cpeb3	NA	NA	NA	NA	NA	NA	NA	NA	NA	NA	NA	0.195544	1	0	1
Cpeb4	NA	NA	NA	NA	NA	NA	NA	NA	NA	NA	NA	0.365819	1	0	1
Daam2	NA	NA	NA	NA	NA	NA	NA	NA	NA	NA	NA	0.329968	1	0	1
Sema5a	NA	NA	NA	NA	NA	NA	NA	NA	NA	NA	NA	0.925328	1	0	1
Eri3	NA	NA	NA	NA	NA	NA	NA	NA	NA	NA	NA	0.697021	1	0	1
Pld2	NA	NA	NA	NA	NA	NA	NA	NA	NA	NA	NA	0.155032	1	0	1
Irs1	NA	NA	NA	NA	NA	NA	NA	NA	NA	NA	NA	0.352706	1	0	1
Met	NA	NA	NA	NA	NA	NA	NA	NA	NA	NA	NA	0.80905	1	0	1
Dync2h1	NA	NA	NA	NA	NA	NA	NA	NA	NA	NA	NA	0.244826	1	0	1
2610307P16Rik	NA	NA	NA	NA	NA	NA	NA	NA	NA	NA	NA	1.01392	1	0	1
Dbi	0.796744	-0.253436	0.781834	0.259703	0.923705	-1.39892	NA	-0.412635	NA	NA	NA	-0.999166	4	4	0
Vdac2	-0.531613	-0.152444	0.147107	0.317516	0.337139	-0.327448	NA	-0.380033	NA	NA	NA	0.694249	4	4	0
Cox7a2	-0.161538	-0.461688	0.64921	NA	1.46128	NA	-0.739566	0.226144	NA	2.50225	-0.580062	NA	4	4	0
Rps15a	-0.701894	-0.270724	0.511883	NA	-1.58413	NA	NA	0.244131	0.80025	NA	NA	NA	3	3	0
Rps14	-0.62681	NA	0.418092	0.236949	-1.43347	NA	3.48834	NA	NA	NA	-0.144724	NA	3	3	0
Msi2	0.467392	-0.808712	NA	-0.288849	NA	NA	NA	0.181805	0.536666	-1.53856	NA	NA	3	3	0
Dctn3	-0.260631	-0.189104	NA	0.4515	NA	0.438267	NA	-0.394662	0.700415	NA	NA	NA	3	3	0
Rab1a	-0.33937	-0.230459	-0.57546	NA	NA	0.158728	NA	0.175696	NA	NA	NA	0.180083	3	3	0
Psma7	-0.310944	0.485519	1.47668	NA	NA	NA	3.34986	-0.319589	-0.172286	NA	NA	NA	3	3	0
Arpc2	-0.520141	NA	-0.104627	NA	0.119841	-0.177254	NA	0.103763	NA	NA	NA	0.309515	3	3	0
Foxn3	0.110647	NA	-0.274332	NA	NA	NA	-1.08068	NA	0.12579	NA	1.04848	-0.56615	3	3	0
Ubl5	-0.441391	-0.434793	1.48909	NA	0.762898	-0.381763	NA	0.196768	NA	NA	NA	NA	3	3	0
Sparc	-0.46558	0.75772	0.316285	NA	-1.55892	NA	-1.34124	0.478719	NA	NA	NA	NA	3	3	0
Mcl1	-0.367776	0.136089	NA	NA	0.188582	-0.484326	NA	0.176894	NA	NA	NA	-0.869828	3	3	0
Atp6v1e1	-0.208551	-0.224333	1.15431	NA	-0.293848	0.384547	NA	NA	NA	NA	NA	0.255906	3	3	0
Atp5j2	-0.353738	-0.48138	NA	NA	0.788081	NA	NA	0.296608	0.979548	NA	-0.559767	NA	3	3	0
Map1lc3a	-0.28987	-0.539771	NA	0.401843	NA	NA	NA	0.559492	NA	NA	-0.626961	1.7069	3	3	0
Ctsb	0.319592	-0.209861	NA	NA	-0.418914	0.394598	NA	0.271239	NA	NA	NA	-0.143158	3	3	0
Aldh2	-0.356002	-0.367097	NA	0.290068	NA	0.370416	-0.658062	0.870443	NA	NA	NA	NA	3	3	0
Usp34	0.322798	NA	-0.113671	NA	NA	-0.182612	-1.1123	0.167047	NA	NA	NA	0.608936	3	3	0
Pkm	-0.280197	-0.423015	NA	0.263378	NA	NA	3.78848	0.487101	NA	-1.5995	NA	NA	3	3	0
Ehmt1	0.36897	NA	-0.284598	NA	NA	-0.266632	-1.51334	0.325059	NA	NA	NA	0.387686	3	3	0
Nek7	0.111374	-0.585029	0.114583	NA	-0.636874	-0.315218	NA	NA	NA	NA	0.563578	NA	3	3	0
Wls	0.481629	0.348716	-0.103275	NA	NA	-0.44729	NA	0.267714	NA	NA	NA	-0.151906	3	3	0
Evi5	0.147555	-0.394464	NA	0.17089	-2.51197	0.356043	NA	NA	NA	NA	NA	-1.39272	3	3	0
Gbf1	0.169736	-0.508605	-0.176753	NA	NA	0.166845	NA	0.156201	NA	NA	NA	-0.102182	3	3	0
Larp4	0.122108	-0.747134	-0.520361	NA	NA	0.385065	NA	0.122381	NA	NA	-0.40382	NA	3	3	0
Uimc1	0.142099	NA	-0.7097	0.250495	NA	-0.127399	NA	0.117011	NA	NA	NA	-0.815495	3	3	0
Gpx4	-0.115244	-0.447191	1.32834	0.271333	NA	NA	2.97177	-0.353909	NA	NA	NA	NA	3	3	0
Hist1h2bc	-0.104213	-0.178241	NA	0.47829	0.728423	NA	NA	-0.262001	NA	NA	NA	0.213345	3	3	0
Hadha	NA	-0.197766	0.386688	NA	0.166473	0.263477	NA	-0.307483	NA	NA	NA	-0.654146	3	3	0
Atraid	NA	0.263664	NA	0.391712	0.663192	-0.350094	NA	-0.205125	NA	NA	NA	-0.558937	3	3	0
Cisd2	NA	-0.271943	NA	NA	0.629071	0.162973	NA	-0.357618	NA	NA	-1.00207	0.204432	3	3	0
Ate1	NA	-0.419128	-0.308915	0.19938	NA	0.370906	NA	-0.48498	NA	NA	NA	0.333631	3	3	0
Rb1cc1	NA	NA	0.126783	0.395063	-1.26183	0.156828	-2.00135	-0.115909	NA	NA	NA	NA	3	3	0
Ly6e	-0.870115	1.20502	NA	NA	-1.02436	NA	NA	NA	NA	NA	1.76008	NA	2	2	0
H2-K1	-0.82074	0.893804	NA	NA	-1.32803	NA	NA	NA	NA	NA	1.4746	NA	2	2	0
Fau	-0.648294	NA	0.972576	0.339722	-1.64324	NA	NA	NA	NA	NA	NA	NA	2	2	0
Tspan13	-0.82467	NA	NA	0.676578	-0.849929	NA	NA	NA	NA	NA	3.79347	NA	2	2	0
Rps18	-0.705316	NA	1.08722	NA	-1.85564	NA	NA	0.107705	NA	NA	NA	NA	2	2	0
Cavin2	-0.768667	0.159074	NA	NA	NA	NA	NA	NA	-0.268109	NA	3.2779	NA	2	2	0
Rpl19	-0.610477	NA	0.756243	0.282753	-1.5362	NA	NA	NA	NA	NA	NA	NA	2	2	0
Rps16	-0.571902	NA	0.960582	NA	-1.08597	NA	NA	0.342329	NA	NA	NA	NA	2	2	0
Smpdl3a	-0.383322	-0.213604	NA	NA	NA	0.114149	NA	NA	NA	NA	1.63256	NA	2	2	0
Hspb1	-0.650168	0.782245	NA	NA	NA	-0.619592	NA	NA	NA	NA	0.903865	NA	2	2	0
Lamtor4	-0.20424	0.334864	NA	NA	0.766315	NA	NA	-0.63452	NA	NA	NA	NA	2	2	0
Sorbs2os	0.868157	NA	NA	-0.7712	NA	NA	NA	NA	NA	NA	0.188557	-1.26257	2	2	0
Sugt1	-0.416161	0.152477	1.33877	NA	NA	-0.752954	NA	NA	NA	NA	NA	NA	2	2	0
Trappc4	-0.614961	0.177084	NA	0.353277	NA	NA	NA	-0.393095	NA	NA	NA	NA	2	2	0
Map4k3	0.397381	NA	NA	NA	NA	NA	-0.780143	0.317266	NA	NA	NA	-0.347376	2	2	0
Mrps16	-0.345851	0.254941	NA	0.555469	NA	NA	NA	-0.205715	NA	NA	NA	NA	2	2	0
Tmem160	-0.111926	-0.11479	NA	NA	NA	NA	NA	0.577354	NA	NA	NA	1.15106	2	2	0
Psmb4	-0.335182	NA	NA	0.415491	NA	NA	NA	-0.346424	NA	NA	NA	0.627395	2	2	0
Sdf2	-0.202284	0.298379	NA	NA	NA	-0.277162	NA	0.241446	NA	NA	NA	NA	2	2	0
Hip1	0.194204	NA	NA	NA	NA	NA	NA	-0.167948	NA	NA	0.915466	-0.403881	2	2	0
Tm2d2	-0.214267	NA	NA	NA	NA	0.260587	NA	-0.342385	NA	NA	NA	0.166159	2	2	0
Irf2	0.141788	NA	NA	NA	-0.701965	-0.172578	NA	0.197676	NA	NA	NA	NA	2	2	0
Rps9	-0.394767	NA	0.883512	0.248984	-1.46346	NA	NA	NA	NA	NA	NA	NA	2	2	0
Ndufa8	-0.333623	-0.225213	NA	0.413675	NA	0.353939	NA	NA	NA	NA	NA	NA	2	2	0
Tm4sf1	-0.706317	NA	NA	0.830621	NA	-0.602148	NA	NA	NA	NA	0.600931	NA	2	2	0
Stox2	0.605865	NA	NA	-0.387164	NA	0.232808	NA	-0.10479	NA	NA	NA	NA	2	2	0
Rex1bd	-0.261199	NA	NA	0.691194	NA	NA	NA	-0.329029	0.459982	NA	NA	NA	2	2	0
Hint1	-0.270132	-0.133031	1.10579	0.251137	NA	NA	NA	NA	NA	NA	NA	NA	2	2	0
Glg1	0.137616	-1.02584	NA	NA	NA	-0.281986	NA	NA	NA	NA	NA	0.210937	2	2	0
Trappc2l	-0.165943	NA	NA	NA	-1.33289	0.157224	NA	0.25077	NA	NA	NA	NA	2	2	0
Cox5b	-0.115491	-0.363095	NA	NA	NA	NA	3.98541	NA	0.585857	NA	NA	NA	2	2	0
Atp5b	-0.150936	-0.353075	NA	0.223253	NA	NA	NA	NA	NA	NA	NA	0.231455	2	2	0
Imp3	-0.247024	NA	NA	0.511933	NA	NA	NA	-0.545134	0.125402	NA	NA	NA	2	2	0
Nsd3	0.193957	NA	-0.443529	NA	-0.82318	NA	NA	NA	NA	NA	NA	0.709732	2	2	0
Ccdc141	0.1505	-0.218645	NA	-0.380822	NA	0.293675	NA	NA	NA	NA	NA	NA	2	2	0
Rpl18	-0.36724	0.100755	NA	0.27633	-1.40031	NA	NA	NA	NA	NA	NA	NA	2	2	0
Ranbp9	0.351933	NA	-0.416786	NA	NA	NA	NA	0.259814	NA	NA	NA	-0.465711	2	2	0
Ddx50	-0.109347	-0.359348	0.104774	NA	NA	NA	NA	0.260664	NA	NA	NA	NA	2	2	0
Ptk2	0.361076	NA	NA	NA	NA	NA	NA	0.102805	NA	NA	-0.603887	-0.423986	2	2	0
Arhgap31	0.110048	NA	NA	NA	NA	NA	NA	-0.15473	NA	NA	1.15132	-0.55992	2	2	0
Suclg1	0.120066	-0.235136	NA	0.465494	NA	NA	NA	NA	NA	NA	NA	-0.244795	2	2	0
Afdn	0.243098	NA	NA	-0.20882	NA	NA	3.26885	-0.127517	NA	NA	NA	NA	2	2	0
Numb	0.311428	NA	-0.584917	NA	NA	NA	-1.97955	0.248803	NA	NA	NA	NA	2	2	0
Braf	0.258585	-0.246258	-0.404397	NA	NA	0.165862	NA	NA	NA	NA	NA	NA	2	2	0
Nrd1	0.113777	0.287166	-0.153415	NA	NA	-0.148404	NA	NA	NA	NA	NA	NA	2	2	0
Sra1	-0.494993	0.199727	NA	0.725881	NA	NA	NA	-0.489859	NA	NA	NA	NA	2	2	0
Pgls	-0.180536	NA	NA	0.47485	-1.22661	NA	NA	0.393282	NA	NA	NA	NA	2	2	0
Snx10	-0.360934	NA	0.223057	NA	NA	0.320846	NA	NA	NA	NA	NA	-0.808809	2	2	0
Xpr1	0.209488	NA	-0.152893	NA	NA	NA	-2.06262	0.513893	NA	NA	NA	NA	2	2	0
Slc35b1	-0.429313	0.171428	0.48345	NA	NA	NA	NA	-0.294978	NA	NA	NA	NA	2	2	0
Setd5	0.197731	NA	-0.2722	NA	NA	-0.113387	NA	0.159936	NA	NA	NA	NA	2	2	0
Mcee	0.472444	-0.405677	NA	NA	NA	-0.144959	NA	0.562626	NA	NA	NA	NA	2	2	0
Zfp644	0.460898	NA	-0.471709	NA	NA	0.158302	NA	-0.12052	NA	NA	NA	NA	2	2	0
Rbm25	0.238882	0.448131	-0.439589	NA	NA	-0.227737	NA	NA	NA	NA	NA	NA	2	2	0
Smg6	0.518699	NA	NA	-0.244369	-0.246143	NA	NA	NA	NA	NA	NA	0.697438	2	2	0
Acox1	0.126782	-0.495347	NA	NA	NA	0.287006	NA	NA	NA	NA	NA	-0.496647	2	2	0
Pik3c2a	0.177049	NA	-0.628413	NA	NA	NA	NA	NA	NA	NA	0.654184	-0.102382	2	2	0
Shroom4	0.297424	NA	-0.466536	NA	NA	NA	NA	NA	NA	NA	2.64616	-0.175932	2	2	0
Mark3	0.243249	NA	-0.442009	NA	NA	NA	-1.89237	0.193174	NA	NA	NA	NA	2	2	0
Gm47167	0.581341	NA	NA	-1.10315	NA	NA	NA	NA	NA	NA	0.215509	-0.728725	2	2	0
Pgk1	0.197344	-0.406688	NA	NA	NA	-0.652904	NA	0.388475	NA	NA	NA	NA	2	2	0
Acap2	0.257576	NA	NA	NA	NA	NA	NA	-0.186046	-0.853875	NA	NA	0.3729	2	2	0
Dnajc1	0.385913	NA	-0.455274	NA	NA	0.126588	NA	NA	NA	NA	NA	-0.183515	2	2	0
Ndufa9	-0.324099	-0.27671	NA	0.66987	NA	NA	NA	0.162969	NA	NA	NA	NA	2	2	0
AW554918	0.686989	NA	-0.31044	NA	NA	-0.1519	NA	0.141857	NA	NA	NA	NA	2	2	0
Iqsec1	0.265988	-0.894921	0.191336	NA	NA	NA	NA	NA	-2.18627	NA	NA	NA	2	2	0
Stk38	0.160428	NA	-0.253141	NA	NA	NA	NA	0.139736	NA	NA	NA	-0.600642	2	2	0
Tkt	0.424044	NA	NA	0.289064	NA	NA	NA	-0.521901	-0.684485	NA	NA	NA	2	2	0
Adk	0.249616	NA	NA	NA	NA	NA	NA	0.122749	NA	NA	-0.818013	-0.409488	2	2	0
Tom1l2	0.328326	NA	-0.384324	NA	NA	NA	NA	0.123557	NA	NA	NA	-0.251952	2	2	0
Itch	0.34271	NA	-0.329909	NA	NA	0.126465	NA	NA	NA	NA	NA	-0.749229	2	2	0
Slc12a6	0.435951	NA	-0.577768	NA	NA	-0.333612	NA	0.279167	NA	NA	NA	NA	2	2	0
Gm19522	0.845368	NA	-0.20714	NA	NA	NA	NA	NA	NA	NA	1.19121	-0.86975	2	2	0
Map2k5	0.668987	NA	NA	NA	NA	-0.274993	NA	0.357781	NA	NA	NA	-0.135689	2	2	0
Tmx4	0.218461	0.172812	-0.326182	NA	NA	-0.196247	NA	NA	NA	NA	NA	NA	2	2	0
Stt3b	0.323445	NA	-0.549174	NA	NA	0.204045	NA	NA	NA	NA	NA	-0.842411	2	2	0
Myo6	0.188224	NA	NA	NA	NA	0.145784	NA	-0.180685	NA	NA	NA	-1.10656	2	2	0
Tead1	0.442786	-0.925231	NA	-0.399846	NA	NA	NA	NA	NA	NA	NA	0.561929	2	2	0
Zyg11b	0.175216	NA	-0.243687	NA	NA	0.360806	NA	-0.130767	NA	NA	NA	NA	2	2	0
Rsbn1	0.206922	NA	-0.814991	0.381509	NA	-0.228517	NA	NA	NA	NA	NA	NA	2	2	0
Dennd4c	0.198536	NA	-0.354269	-0.444283	NA	NA	NA	0.250017	NA	NA	NA	NA	2	2	0
Tnfaip8	0.306287	-0.166008	-0.200543	NA	NA	NA	2.26551	NA	NA	NA	NA	NA	2	2	0
Pibf1	0.615655	NA	NA	-0.717176	NA	-0.270874	NA	0.160786	NA	NA	NA	NA	2	2	0
Cnot1	0.147971	NA	-0.37589	NA	NA	-0.186476	NA	NA	NA	NA	NA	0.384031	2	2	0
Stx16	0.159331	NA	NA	NA	NA	-0.373774	NA	0.143429	NA	NA	NA	-0.20835	2	2	0
Fuca1	0.591145	-0.15685	NA	NA	-0.53842	0.427693	NA	NA	NA	NA	NA	NA	2	2	0
Strbp	0.429887	-0.862339	-0.635341	NA	NA	NA	NA	0.169706	NA	NA	NA	NA	2	2	0
Cyb5b	-0.206037	NA	0.768679	NA	NA	-0.604014	NA	0.194692	NA	NA	NA	NA	2	2	0
Akap8l	0.130813	NA	-0.162609	NA	NA	NA	NA	0.151734	NA	NA	NA	-0.438937	2	2	0
Usp15	0.150493	NA	-0.291518	NA	-2.2091	NA	NA	0.159989	NA	NA	NA	NA	2	2	0
Vps54	0.409026	NA	-0.378592	NA	NA	NA	NA	0.29555	NA	NA	NA	-1.02289	2	2	0
Tgfbr3	0.145652	-0.387624	NA	NA	NA	NA	NA	NA	0.549108	NA	NA	-0.258332	2	2	0
Clpp	-0.159038	NA	NA	NA	NA	0.188021	NA	-0.144459	NA	NA	NA	0.298376	2	2	0
Mtmr3	0.373318	NA	-0.319019	NA	-1.24917	NA	NA	0.146758	NA	NA	NA	NA	2	2	0
Clint1	0.12046	-0.39439	-0.32535	0.360214	NA	NA	NA	NA	NA	NA	NA	NA	2	2	0
Nup98	0.248052	NA	-0.382118	-0.437996	NA	0.335244	NA	NA	NA	NA	NA	NA	2	2	0
Rprd2	0.544172	NA	-0.599278	NA	NA	-0.111882	NA	NA	NA	NA	NA	0.324667	2	2	0
Rmnd5a	0.111837	NA	NA	NA	NA	-0.234898	NA	0.108889	NA	NA	NA	-0.998715	2	2	0
Tent4b	0.184662	NA	-0.846305	NA	NA	-0.288583	NA	0.203766	NA	NA	NA	NA	2	2	0
Vps13c	0.187858	NA	-0.510516	-0.448085	NA	0.2062	NA	NA	NA	NA	NA	NA	2	2	0
Zfp950	0.415874	NA	-0.484776	NA	NA	0.236151	NA	-0.161818	NA	NA	NA	NA	2	2	0
Zmym4	0.129821	NA	-0.264133	0.114056	NA	NA	NA	NA	NA	NA	NA	-0.586283	2	2	0
Preb	0.101593	NA	NA	NA	NA	0.528789	NA	-0.269511	NA	NA	NA	-1.17116	2	2	0
Tnpo3	0.10368	NA	-0.51365	NA	NA	NA	NA	-0.183339	NA	NA	NA	0.162851	2	2	0
Rab24	0.322406	NA	0.226115	NA	NA	-0.171076	NA	NA	NA	NA	NA	-0.456831	2	2	0
Ccnt2	0.262345	NA	-0.433865	NA	NA	NA	NA	0.150758	NA	NA	NA	-0.104113	2	2	0
B430010I23Rik	0.405615	NA	NA	NA	NA	NA	NA	-0.155541	NA	NA	0.520284	-0.930125	2	2	0
Tut4	0.149786	NA	-0.305182	NA	NA	0.124266	-0.981813	NA	NA	NA	NA	NA	2	2	0
Large1	0.448195	NA	-0.479782	NA	NA	0.187132	NA	NA	NA	NA	NA	-0.150014	2	2	0
Sltm	0.179578	NA	-0.350034	NA	NA	0.142167	-1.56338	NA	NA	NA	NA	NA	2	2	0
Map2k4	0.219549	NA	-0.653693	NA	NA	0.121075	NA	NA	NA	NA	NA	-0.308087	2	2	0
Cdc40	-0.289638	NA	-0.346153	NA	NA	0.100693	NA	0.101639	NA	NA	NA	NA	2	2	0
Ezr	0.455781	-0.454518	0.28261	NA	NA	-0.468214	NA	NA	NA	NA	NA	NA	2	2	0
Casd1	0.150055	NA	-0.318685	0.293031	NA	-0.238943	NA	NA	NA	NA	NA	NA	2	2	0
Timp3	-0.130397	0.494362	NA	NA	NA	0.119291	NA	NA	NA	NA	NA	-0.508346	2	2	0
Usp6nl	0.364422	NA	NA	-0.105483	NA	0.199258	NA	NA	NA	NA	NA	-0.317839	2	2	0
Vwa8	0.416873	NA	-0.353274	NA	NA	0.140097	NA	NA	NA	NA	NA	-0.288133	2	2	0
Zfp609	0.36598	NA	-0.328888	NA	NA	-0.282867	NA	0.195228	NA	NA	NA	NA	2	2	0
Rif1	0.122853	NA	-0.16195	NA	NA	NA	NA	-0.133301	NA	NA	NA	0.928318	2	2	0
4732471J01Rik	0.291068	NA	-0.158531	-0.406685	NA	NA	3.3789	NA	NA	NA	NA	NA	2	2	0
Atrn	0.108156	NA	-0.203452	NA	NA	0.139416	NA	NA	NA	NA	NA	-0.495334	2	2	0
D5Ertd579e	0.205859	NA	0.272061	NA	NA	-0.31552	NA	-0.159733	NA	NA	NA	NA	2	2	0
Ppp4r3a	0.166755	NA	-0.856096	NA	NA	-0.177193	NA	NA	NA	NA	NA	0.146838	2	2	0
Cntln	0.103971	NA	NA	-0.587365	NA	-0.25691	NA	0.165419	NA	NA	NA	NA	2	2	0
Ddrgk1	NA	0.570221	NA	0.398994	NA	NA	NA	-0.415282	-0.630889	NA	NA	NA	2	2	0
Nptn	NA	-0.552857	NA	NA	-0.676084	0.714963	NA	0.206007	NA	NA	NA	NA	2	2	0
Bcap31	NA	0.306731	NA	NA	NA	-0.360906	NA	-0.612202	0.303188	NA	NA	NA	2	2	0
Lgmn	NA	-0.110425	NA	0.267316	NA	NA	NA	0.214784	NA	NA	NA	-0.41206	2	2	0
Tmem33	NA	0.120544	NA	NA	NA	-0.922407	NA	-0.305823	NA	NA	NA	0.478141	2	2	0
Fdps	NA	0.467663	NA	0.651318	NA	NA	NA	-0.613339	NA	NA	NA	-0.97796	2	2	0
Prdm16	NA	-0.816105	-0.262643	NA	NA	0.535585	NA	NA	NA	NA	1.10491	NA	2	2	0
Cux1	NA	-0.452089	NA	NA	-1.29511	0.216535	NA	0.158663	NA	NA	NA	NA	2	2	0
Cd9	NA	0.143685	0.91314	NA	NA	NA	-0.752405	-0.316149	NA	NA	NA	NA	2	2	0
Ola1	NA	-0.401639	0.197378	-0.187757	NA	NA	NA	0.265651	NA	NA	NA	NA	2	2	0
Kcmf1	NA	-0.851538	NA	NA	NA	NA	NA	0.325546	0.454774	NA	NA	-0.289378	2	2	0
Itpk1	NA	-0.844653	0.228339	-0.405733	NA	NA	NA	0.109196	NA	NA	NA	NA	2	2	0
Plcl1	NA	-0.387616	NA	0.145838	NA	NA	-1.66708	0.234446	NA	NA	NA	NA	2	2	0
Golph3	NA	-0.381223	0.121877	NA	NA	NA	NA	-0.198614	0.570235	NA	NA	NA	2	2	0
Zmynd11	NA	-0.297442	-0.67421	NA	NA	NA	3.83058	NA	NA	NA	NA	0.469871	2	2	0
Slc25a4	NA	-0.402196	NA	0.349957	0.582219	NA	NA	-0.49538	NA	NA	NA	NA	2	2	0
Gramd1b	NA	-1.12236	-0.106653	NA	NA	0.13346	NA	NA	NA	NA	NA	0.316322	2	2	0
Wwc2	NA	-0.904028	NA	NA	NA	0.213522	NA	-0.245973	NA	NA	0.765452	NA	2	2	0
Cox6c	NA	-0.759541	0.99268	NA	0.595606	NA	NA	NA	NA	NA	-0.386088	NA	2	2	0
March7	NA	NA	-0.74842	NA	NA	0.110601	3.42187	NA	NA	NA	NA	-0.153864	2	2	0
Ndufs4	NA	NA	0.14009	NA	NA	-0.395642	NA	0.263806	NA	NA	NA	-0.339078	2	2	0
Foxj3	NA	NA	-1.00907	NA	NA	0.334226	NA	0.170328	NA	NA	NA	-0.391945	2	2	0
Rlf	NA	NA	-0.209003	0.182246	NA	NA	3.38067	-0.214215	NA	NA	NA	NA	2	2	0
Vmp1	NA	NA	0.639146	0.348651	-0.914883	NA	NA	NA	NA	NA	NA	-0.101134	2	2	0
Kdm1a	NA	NA	-0.383163	NA	NA	0.233632	NA	-0.24916	NA	NA	NA	0.430296	2	2	0
Trrap	NA	NA	-0.725089	-0.136507	NA	0.565511	NA	NA	NA	NA	NA	0.385789	2	2	0
Chuk	NA	NA	0.391577	NA	NA	-0.636473	NA	-0.103552	NA	NA	NA	0.189304	2	2	0
Gm37494	NA	NA	-0.198536	NA	NA	0.159548	NA	0.10589	NA	NA	NA	-0.893981	2	2	0
Atr	NA	NA	-0.797911	-0.220719	NA	0.160113	NA	0.387715	NA	NA	NA	NA	2	2	0
Wdpcp	NA	NA	0.367595	NA	NA	NA	NA	0.167312	-0.967608	NA	NA	-0.822734	2	2	0
Mark2	NA	NA	-0.292409	NA	NA	-0.364365	NA	0.137806	NA	NA	NA	0.179126	2	2	0
Soga1	NA	NA	-0.635918	NA	NA	0.214812	-1.73466	0.224077	NA	NA	NA	NA	2	2	0
Srsf7	NA	NA	0.500971	NA	NA	-0.274211	3.44208	-0.382857	NA	NA	NA	NA	2	2	0
Rngtt	NA	NA	-0.173758	NA	NA	0.466878	NA	0.258814	NA	NA	NA	-0.821409	2	2	0
2610035D17Rik	NA	NA	-0.625001	-0.781634	NA	NA	NA	0.264791	NA	NA	NA	0.335496	2	2	0
Rfx7	NA	NA	0.112278	-0.640521	NA	0.438804	NA	NA	NA	NA	NA	-0.675494	2	2	0
Daam1	NA	NA	NA	-0.416253	NA	0.569822	NA	NA	-1.55707	NA	NA	0.367061	2	2	0
Map1b	NA	NA	NA	-0.156446	NA	-0.286884	NA	NA	NA	NA	0.879485	0.168048	2	2	0
Samd4	NA	NA	NA	-0.59479	NA	0.476242	NA	0.341716	NA	NA	NA	-0.750961	2	2	0
Phldb1	NA	NA	NA	NA	NA	-0.271407	NA	0.122608	-2.09055	NA	0.193912	NA	2	2	0
Cbfa2t2	NA	NA	NA	NA	NA	0.593768	-1.94957	0.101582	NA	NA	NA	-0.524973	2	2	0
Sox18	-1.29914	NA	NA	NA	NA	NA	NA	NA	NA	NA	2.95218	NA	1	1	0
Ly6a	-0.924874	NA	NA	NA	NA	NA	NA	NA	NA	NA	6.6628	NA	1	1	0
Itm2a	-1.0503	NA	NA	NA	NA	NA	NA	NA	NA	NA	2.39411	NA	1	1	0
Slc9a3r2	-0.746298	NA	NA	NA	NA	NA	NA	NA	NA	NA	1.31825	NA	1	1	0
Cd151	-0.84196	0.285745	NA	NA	NA	NA	NA	NA	NA	NA	NA	NA	1	1	0
Cd34	-0.665173	NA	NA	NA	NA	NA	NA	NA	NA	NA	1.69838	NA	1	1	0
Bst2	-0.84864	0.565259	NA	NA	NA	NA	NA	NA	NA	NA	NA	NA	1	1	0
Lsr	-0.602828	NA	NA	NA	NA	NA	NA	NA	NA	NA	3.57822	NA	1	1	0
Ltbp4	-0.632365	NA	NA	NA	NA	NA	NA	NA	NA	NA	1.71179	NA	1	1	0
Klf2	-0.674828	NA	NA	NA	NA	NA	NA	NA	NA	NA	2.55855	NA	1	1	0
Pglyrp1	-0.933954	NA	NA	NA	NA	NA	NA	NA	NA	NA	4.2501	NA	1	1	0
Egfl7	-0.479314	NA	NA	NA	NA	NA	NA	NA	NA	NA	6.53306	NA	1	1	0
Acvrl1	-0.584039	NA	NA	NA	NA	NA	NA	NA	NA	NA	3.28352	NA	1	1	0
Tpm4	-0.668028	NA	NA	NA	NA	0.119226	NA	NA	NA	NA	NA	NA	1	1	0
S1pr1	-0.482043	NA	NA	NA	NA	NA	NA	NA	NA	NA	2.90213	NA	1	1	0
Sox17	-0.660974	NA	NA	NA	NA	NA	NA	NA	NA	NA	5.91184	NA	1	1	0
Marc2	-0.169189	NA	NA	NA	NA	NA	NA	0.733829	NA	NA	NA	NA	1	1	0
Cav1	-0.655246	NA	NA	NA	NA	NA	NA	NA	NA	NA	1.52176	NA	1	1	0
B4galt4	-0.683591	NA	NA	NA	NA	NA	NA	NA	NA	NA	0.931099	NA	1	1	0
Eng	-0.496706	NA	NA	NA	NA	NA	NA	NA	NA	NA	1.50275	NA	1	1	0
Cdh5	-0.445489	NA	NA	NA	NA	NA	NA	NA	NA	NA	1.85615	NA	1	1	0
Flnb	0.250167	NA	NA	NA	NA	NA	NA	NA	NA	NA	NA	-0.410704	1	1	0
Grasp	-0.522449	NA	NA	NA	NA	NA	NA	NA	NA	NA	1.75653	NA	1	1	0
Smco4	-0.656695	NA	NA	0.343243	NA	NA	NA	NA	NA	NA	NA	NA	1	1	0
Hspa12b	-0.129059	NA	NA	NA	NA	NA	NA	NA	NA	NA	2.90291	NA	1	1	0
Mbnl2	0.203362	-0.458369	NA	NA	NA	NA	NA	NA	NA	NA	NA	NA	1	1	0
Clic5	-0.265572	NA	NA	NA	NA	NA	NA	NA	NA	NA	5.77676	NA	1	1	0
Nfia	0.459292	NA	NA	NA	NA	NA	-1.18574	NA	NA	NA	NA	NA	1	1	0
Mast4	0.414943	NA	NA	NA	NA	NA	NA	NA	-1.48115	NA	NA	NA	1	1	0
Bcam	-0.525601	NA	NA	NA	NA	NA	NA	NA	NA	NA	0.611235	NA	1	1	0
Akt1	-0.60774	NA	NA	0.131399	NA	NA	NA	NA	NA	NA	NA	NA	1	1	0
Pecam1	-0.322496	NA	NA	NA	NA	NA	NA	NA	NA	NA	4.58425	NA	1	1	0
Tshz2	0.546213	NA	-0.150192	NA	NA	NA	NA	NA	NA	NA	NA	NA	1	1	0
Dip2b	0.208167	NA	-0.174984	NA	NA	NA	NA	NA	NA	NA	NA	NA	1	1	0
Slfn5	-0.397054	NA	NA	NA	NA	NA	NA	NA	NA	NA	1.13045	NA	1	1	0
Fas	-0.370992	NA	NA	NA	NA	NA	NA	NA	NA	NA	1.67256	NA	1	1	0
Kank3	-0.377111	NA	NA	NA	NA	NA	NA	NA	NA	NA	2.3273	NA	1	1	0
Cmtm8	-0.503806	NA	NA	0.514446	NA	NA	NA	NA	NA	NA	NA	NA	1	1	0
Tiam1	-0.732591	NA	NA	NA	NA	0.399685	NA	NA	NA	NA	NA	NA	1	1	0
Adam15	-0.426143	NA	NA	NA	NA	NA	NA	NA	NA	NA	1.34285	NA	1	1	0
Uqcc3	-0.221771	NA	NA	0.308174	NA	NA	NA	NA	NA	NA	NA	NA	1	1	0
Abcb1a	-0.326202	NA	NA	NA	NA	NA	NA	NA	NA	NA	4.39639	NA	1	1	0
Fam129b	-0.530692	NA	NA	NA	NA	NA	NA	NA	NA	NA	1.98072	NA	1	1	0
Nes	-0.438212	NA	NA	NA	NA	NA	NA	NA	NA	NA	1.12561	NA	1	1	0
Amfr	-0.314515	NA	NA	NA	NA	NA	NA	NA	NA	NA	NA	0.272969	1	1	0
Mrpl14	-0.196605	NA	NA	NA	NA	NA	NA	0.202576	NA	NA	NA	NA	1	1	0
Rasip1	-0.316991	NA	NA	NA	NA	NA	NA	NA	NA	NA	3.43718	NA	1	1	0
She	-0.384368	NA	NA	NA	NA	NA	NA	NA	NA	NA	3.45926	NA	1	1	0
Unc13b	0.527651	NA	NA	NA	NA	NA	NA	NA	NA	NA	NA	-0.568768	1	1	0
Ppp1r13b	0.284048	NA	NA	NA	NA	NA	NA	-0.107745	NA	NA	NA	NA	1	1	0
Fyco1	-0.342494	NA	NA	NA	NA	NA	NA	0.200883	NA	NA	NA	NA	1	1	0
Pdgfb	-0.259046	NA	NA	NA	NA	NA	NA	NA	NA	NA	2.83933	NA	1	1	0
Car4	-0.847545	NA	NA	NA	NA	NA	NA	NA	NA	NA	0.146063	NA	1	1	0
Gid8	-0.616567	NA	NA	0.103769	NA	NA	NA	NA	NA	NA	NA	NA	1	1	0
Tpst2	-0.486219	NA	NA	NA	NA	NA	3.25281	NA	NA	NA	NA	NA	1	1	0
Ier2	-0.500075	NA	NA	NA	NA	0.922696	NA	NA	NA	NA	NA	NA	1	1	0
Alg14	-0.442753	0.180193	NA	NA	NA	NA	NA	NA	NA	NA	NA	NA	1	1	0
Gimap6	-0.379408	NA	NA	NA	NA	NA	NA	NA	NA	NA	3.18663	NA	1	1	0
Maoa	-0.383624	NA	NA	NA	NA	NA	NA	NA	NA	NA	1.83863	NA	1	1	0
Klf6	-0.475738	NA	NA	NA	NA	0.977875	NA	NA	NA	NA	NA	NA	1	1	0
Cttnbp2nl	-0.398552	NA	NA	NA	NA	NA	NA	0.163179	NA	NA	NA	NA	1	1	0
Mef2c	0.430539	NA	NA	-0.725709	NA	NA	NA	NA	NA	NA	NA	NA	1	1	0
Sae1	-0.360661	NA	NA	NA	NA	0.2441	NA	NA	NA	NA	NA	NA	1	1	0
Coro1c	-0.169816	NA	NA	NA	NA	NA	NA	0.19771	NA	NA	NA	NA	1	1	0
Cbr1	-0.487828	NA	NA	NA	NA	0.426606	NA	NA	NA	NA	NA	NA	1	1	0
Cd93	-0.276889	NA	NA	NA	NA	NA	NA	NA	NA	NA	2.28129	NA	1	1	0
Ccdc124	-0.438982	NA	NA	0.542973	NA	NA	NA	NA	NA	NA	NA	NA	1	1	0
Acer2	-0.119263	NA	NA	NA	NA	NA	NA	NA	NA	NA	3.77028	NA	1	1	0
Nfib	0.166602	-0.612753	NA	NA	NA	NA	NA	NA	NA	NA	NA	NA	1	1	0
9930111J21Rik2	-0.429534	NA	NA	NA	NA	NA	NA	NA	NA	NA	1.24763	NA	1	1	0
Tmcc3	0.112281	NA	NA	NA	NA	NA	NA	-0.114805	NA	NA	NA	NA	1	1	0
Slc7a5	-0.555978	NA	NA	NA	NA	NA	NA	NA	NA	NA	2.21753	NA	1	1	0
Epc1	0.452188	NA	-0.239072	NA	NA	NA	NA	NA	NA	NA	NA	NA	1	1	0
Sema7a	-0.183365	NA	NA	NA	NA	NA	NA	NA	NA	NA	5.41574	NA	1	1	0
Mindy1	-0.380958	NA	NA	NA	NA	NA	NA	NA	NA	NA	1.4374	NA	1	1	0
Mllt10	0.202025	NA	-0.461066	NA	NA	NA	NA	NA	NA	NA	NA	NA	1	1	0
Sgk3	0.162847	-0.597717	NA	NA	NA	NA	NA	NA	NA	NA	NA	NA	1	1	0
Prom1	-0.176501	NA	NA	NA	NA	NA	NA	NA	NA	NA	3.45711	NA	1	1	0
Jcad	-0.227935	NA	NA	NA	NA	NA	NA	NA	NA	NA	2.38557	NA	1	1	0
Nktr	0.517875	NA	NA	NA	NA	NA	NA	NA	NA	NA	NA	-0.993269	1	1	0
Dock6	0.27068	NA	NA	NA	NA	NA	NA	NA	NA	NA	NA	-0.512923	1	1	0
Pde2a	-0.129815	NA	NA	NA	NA	NA	NA	NA	NA	NA	0.839342	NA	1	1	0
Ppme1	0.106	NA	NA	NA	NA	-0.521979	NA	NA	NA	NA	NA	NA	1	1	0
Ppp3cc	0.140232	NA	NA	NA	NA	-0.352952	NA	NA	NA	NA	NA	NA	1	1	0
Ggnbp2	0.227554	NA	-0.434492	NA	NA	NA	NA	NA	NA	NA	NA	NA	1	1	0
9630028H03Rik	0.772982	NA	-0.645135	NA	NA	NA	NA	NA	NA	NA	NA	NA	1	1	0
Ulk2	0.148521	NA	NA	NA	NA	-0.518873	NA	NA	NA	NA	NA	NA	1	1	0
Lrrc49	-0.108122	NA	NA	NA	NA	NA	NA	NA	NA	NA	1.92227	NA	1	1	0
Fn1	-0.151366	NA	NA	NA	NA	NA	NA	NA	NA	NA	3.02805	NA	1	1	0
Cpne8	0.253118	NA	NA	NA	NA	-0.219776	NA	NA	NA	NA	NA	NA	1	1	0
Kctd12	-0.223086	NA	NA	NA	NA	NA	NA	NA	NA	NA	1.91867	NA	1	1	0
Pds5b	0.136557	NA	NA	NA	NA	NA	NA	NA	NA	NA	NA	-0.384224	1	1	0
Podxl	-0.284165	NA	NA	NA	NA	NA	NA	NA	NA	NA	3.87865	NA	1	1	0
4930523C07Rik	-0.13375	NA	NA	NA	NA	0.746035	NA	NA	NA	NA	NA	NA	1	1	0
Btg2	-0.156332	NA	NA	NA	NA	0.9571	NA	NA	NA	NA	NA	NA	1	1	0
Flt1	-0.196824	NA	NA	NA	NA	NA	NA	NA	NA	NA	2.99921	NA	1	1	0
Peli1	0.161497	NA	NA	NA	NA	NA	NA	-0.15981	NA	NA	NA	NA	1	1	0
Hivep1	0.121714	NA	NA	NA	NA	-0.13975	NA	NA	NA	NA	NA	NA	1	1	0
Map4k5	0.538252	NA	NA	NA	NA	-0.153205	NA	NA	NA	NA	NA	NA	1	1	0
Slc25a32	-0.382556	NA	NA	0.562988	NA	NA	NA	NA	NA	NA	NA	NA	1	1	0
Ppp2r5e	0.405305	NA	-1.00451	NA	NA	NA	NA	NA	NA	NA	NA	NA	1	1	0
Slc39a10	-0.165503	NA	NA	NA	NA	NA	NA	NA	NA	NA	0.930332	NA	1	1	0
Zhx1	-0.287274	NA	NA	NA	NA	NA	NA	NA	NA	NA	0.501857	NA	1	1	0
Rnf115	0.199553	NA	-0.387013	NA	NA	NA	NA	NA	NA	NA	NA	NA	1	1	0
Dgkz	-0.473927	NA	0.238036	NA	NA	NA	NA	NA	NA	NA	NA	NA	1	1	0
Klf4	-0.357027	NA	NA	NA	NA	NA	NA	NA	NA	NA	2.56381	NA	1	1	0
Man1a2	0.12313	NA	NA	NA	-0.886525	NA	NA	NA	NA	NA	NA	NA	1	1	0
Tcf4	0.116138	NA	-0.394403	NA	NA	NA	NA	NA	NA	NA	NA	NA	1	1	0
Mrps26	0.119901	NA	NA	NA	NA	NA	NA	-0.391164	NA	NA	NA	NA	1	1	0
Uaca	-0.232975	NA	NA	NA	NA	0.175521	NA	NA	NA	NA	NA	NA	1	1	0
Prkd2	-0.142025	NA	NA	NA	NA	NA	NA	NA	NA	NA	1.78463	NA	1	1	0
Fbxw7	0.476652	NA	NA	NA	NA	-0.180019	NA	NA	NA	NA	NA	NA	1	1	0
Sipa1l2	0.145839	NA	NA	NA	NA	-0.20905	NA	NA	NA	NA	NA	NA	1	1	0
Epb41	0.334576	NA	NA	NA	-0.844056	NA	NA	NA	NA	NA	NA	NA	1	1	0
Apc	0.186398	NA	NA	NA	NA	NA	NA	NA	NA	NA	NA	-0.425979	1	1	0
Abcg2	-0.191348	NA	NA	NA	NA	NA	NA	NA	NA	NA	2.3082	NA	1	1	0
Ccar1	0.10759	NA	NA	NA	NA	NA	NA	-0.104544	NA	NA	NA	NA	1	1	0
Asxl1	0.300751	NA	NA	NA	NA	-0.198126	NA	NA	NA	NA	NA	NA	1	1	0
Mcf2l	0.263113	NA	NA	NA	NA	NA	NA	NA	NA	NA	NA	-0.693994	1	1	0
Shroom2	0.642343	NA	NA	NA	NA	NA	NA	-0.375976	NA	NA	NA	NA	1	1	0
Rcan2	0.389865	NA	NA	NA	NA	NA	NA	-0.107883	NA	NA	NA	NA	1	1	0
Trak1	0.392705	NA	NA	NA	NA	-0.288415	NA	NA	NA	NA	NA	NA	1	1	0
Sec61a1	-0.257947	NA	NA	0.647331	NA	NA	NA	NA	NA	NA	NA	NA	1	1	0
Zc3h13	-0.15827	NA	NA	NA	NA	NA	NA	NA	NA	NA	NA	0.40032	1	1	0
Dipk1a	0.307972	-0.183971	NA	NA	NA	NA	NA	NA	NA	NA	NA	NA	1	1	0
Ccnd1	-0.214991	NA	NA	NA	NA	NA	NA	NA	NA	NA	1.92341	NA	1	1	0
Dusp16	0.353456	NA	NA	NA	NA	-0.327297	NA	NA	NA	NA	NA	NA	1	1	0
Setd2	0.208343	NA	NA	NA	NA	-0.272386	NA	NA	NA	NA	NA	NA	1	1	0
Ubr1	0.315409	NA	-0.736533	NA	NA	NA	NA	NA	NA	NA	NA	NA	1	1	0
Aqr	-0.120809	NA	NA	NA	NA	0.28368	NA	NA	NA	NA	NA	NA	1	1	0
Socs5	-0.267683	NA	NA	NA	NA	NA	NA	NA	NA	NA	1.24072	NA	1	1	0
Ltn1	0.212094	NA	NA	NA	NA	NA	NA	-0.191541	NA	NA	NA	NA	1	1	0
Tpd52l1	0.118494	-0.141622	NA	NA	NA	NA	NA	NA	NA	NA	NA	NA	1	1	0
Map3k20	0.167198	NA	NA	NA	NA	NA	NA	NA	NA	NA	NA	-0.640269	1	1	0
Prrg1	0.290217	NA	NA	NA	NA	NA	NA	-0.224809	NA	NA	NA	NA	1	1	0
Zfp638	0.124754	NA	-0.506645	NA	NA	NA	NA	NA	NA	NA	NA	NA	1	1	0
Nhsl2	0.291869	-0.728871	NA	NA	NA	NA	NA	NA	NA	NA	NA	NA	1	1	0
Heatr5a	0.156255	NA	NA	NA	NA	NA	-1.63334	NA	NA	NA	NA	NA	1	1	0
1810013L24Rik	0.232128	NA	NA	NA	NA	-0.137801	NA	NA	NA	NA	NA	NA	1	1	0
Ncoa3	0.236908	NA	NA	NA	NA	NA	NA	-0.286555	NA	NA	NA	NA	1	1	0
Cgrrf1	-0.297515	0.152356	NA	NA	NA	NA	NA	NA	NA	NA	NA	NA	1	1	0
Ccnl1	0.427218	NA	NA	NA	NA	NA	NA	NA	NA	NA	NA	-0.422047	1	1	0
Notch4	-0.311607	NA	NA	NA	NA	NA	NA	NA	NA	NA	1.41501	NA	1	1	0
Exoc6	-0.134079	NA	NA	NA	NA	NA	NA	0.362136	NA	NA	NA	NA	1	1	0
Emsy	0.156476	NA	NA	NA	NA	-0.283928	NA	NA	NA	NA	NA	NA	1	1	0
Ptprb	-0.160389	NA	NA	NA	NA	NA	NA	NA	NA	NA	5.86154	NA	1	1	0
Slc7a1	-0.180111	NA	NA	NA	NA	NA	NA	NA	NA	NA	0.897001	NA	1	1	0
Myh10	0.140613	NA	NA	NA	NA	-0.823718	NA	NA	NA	NA	NA	NA	1	1	0
Fam222b	0.657136	NA	-0.305229	NA	NA	NA	NA	NA	NA	NA	NA	NA	1	1	0
Pou2f1	0.47833	NA	NA	-0.190446	NA	NA	NA	NA	NA	NA	NA	NA	1	1	0
Lpar6	-0.299124	NA	NA	NA	NA	NA	NA	NA	NA	NA	1.3689	NA	1	1	0
Atp7a	0.311122	NA	NA	NA	NA	NA	NA	NA	NA	NA	NA	-0.225241	1	1	0
Tomm70a	-0.110318	NA	NA	NA	NA	0.293351	NA	NA	NA	NA	NA	NA	1	1	0
Patz1	-0.205274	NA	NA	NA	NA	0.272161	NA	NA	NA	NA	NA	NA	1	1	0
Dusp6	-0.625149	NA	NA	NA	NA	NA	3.23759	NA	NA	NA	NA	NA	1	1	0
Kdm3a	0.216522	NA	-0.39759	NA	NA	NA	NA	NA	NA	NA	NA	NA	1	1	0
Pkd1	0.501505	NA	-0.186938	NA	NA	NA	NA	NA	NA	NA	NA	NA	1	1	0
Nek9	-0.198406	NA	NA	NA	NA	0.198161	NA	NA	NA	NA	NA	NA	1	1	0
Zdhhc18	0.102932	NA	NA	NA	NA	-0.218744	NA	NA	NA	NA	NA	NA	1	1	0
Kat2b	0.469895	NA	NA	NA	NA	NA	NA	-0.148343	NA	NA	NA	NA	1	1	0
Adam17	0.139606	NA	NA	NA	NA	NA	NA	-0.130957	NA	NA	NA	NA	1	1	0
Mical3	0.496785	NA	NA	NA	NA	NA	NA	NA	NA	NA	NA	-0.114634	1	1	0
Spin1	0.118596	NA	NA	NA	NA	NA	NA	NA	NA	NA	NA	-0.205693	1	1	0
Lcor	0.407661	NA	NA	NA	-2.1277	NA	NA	NA	NA	NA	NA	NA	1	1	0
Tmem44	0.482788	NA	-0.16799	NA	NA	NA	NA	NA	NA	NA	NA	NA	1	1	0
Jak2	-0.158987	NA	NA	NA	NA	0.161813	NA	NA	NA	NA	NA	NA	1	1	0
Eif4g3	0.107166	-0.275005	NA	NA	NA	NA	NA	NA	NA	NA	NA	NA	1	1	0
Sec24b	-0.109328	NA	NA	NA	NA	NA	NA	0.393847	NA	NA	NA	NA	1	1	0
Eml4	0.418956	NA	-0.509935	NA	NA	NA	NA	NA	NA	NA	NA	NA	1	1	0
Colgalt2	0.290144	NA	NA	NA	NA	NA	NA	NA	NA	NA	NA	-0.631127	1	1	0
Tacc2	0.395705	NA	NA	NA	NA	-0.407547	NA	NA	NA	NA	NA	NA	1	1	0
Zmym2	0.110232	NA	-0.710525	NA	NA	NA	NA	NA	NA	NA	NA	NA	1	1	0
Rps6ka5	0.58838	NA	NA	NA	NA	-0.249669	NA	NA	NA	NA	NA	NA	1	1	0
Sin3a	-0.251628	NA	NA	NA	NA	0.106118	NA	NA	NA	NA	NA	NA	1	1	0
Flna	-0.223333	NA	NA	NA	NA	0.40302	NA	NA	NA	NA	NA	NA	1	1	0
Adamts1	0.227604	NA	NA	NA	NA	NA	NA	NA	NA	NA	-1.28956	NA	1	1	0
Plekhh2	0.181061	NA	NA	-1.41368	NA	NA	NA	NA	NA	NA	NA	NA	1	1	0
Rprd1b	0.129035	NA	NA	NA	NA	-0.537308	NA	NA	NA	NA	NA	NA	1	1	0
Myo1b	0.249055	NA	NA	NA	NA	NA	-1.90266	NA	NA	NA	NA	NA	1	1	0
Ncoa7	0.269703	NA	NA	-0.694625	NA	NA	NA	NA	NA	NA	NA	NA	1	1	0
Trak2	0.294292	NA	-0.427954	NA	NA	NA	NA	NA	NA	NA	NA	NA	1	1	0
Creb3l2	0.137393	NA	NA	NA	NA	NA	NA	-0.151608	NA	NA	NA	NA	1	1	0
4430402I18Rik	0.27504	NA	NA	NA	NA	-0.510837	NA	NA	NA	NA	NA	NA	1	1	0
Gm49417	0.416345	NA	NA	NA	NA	-0.183048	NA	NA	NA	NA	NA	NA	1	1	0
Edn1	-0.490398	NA	NA	NA	NA	NA	NA	NA	NA	NA	7.21226	NA	1	1	0
Herc6	0.118939	NA	NA	NA	NA	NA	NA	NA	NA	NA	NA	-0.876587	1	1	0
Myof	0.135549	-0.88039	NA	NA	NA	NA	NA	NA	NA	NA	NA	NA	1	1	0
Gm15614	0.374778	NA	NA	NA	NA	NA	NA	NA	NA	NA	NA	-0.184415	1	1	0
Baiap2l1	0.158984	-0.812862	NA	NA	NA	NA	NA	NA	NA	NA	NA	NA	1	1	0
Kdm7a	-0.165582	NA	NA	NA	NA	0.223592	NA	NA	NA	NA	NA	NA	1	1	0
Slc6a6	-0.127155	NA	NA	NA	NA	NA	NA	NA	NA	NA	5.70897	NA	1	1	0
Prkd1	0.420892	NA	NA	NA	NA	NA	NA	NA	NA	NA	NA	-0.464679	1	1	0
Hspa1b	0.278913	NA	NA	NA	NA	-0.528153	NA	NA	NA	NA	NA	NA	1	1	0
Dcbld2	0.143781	NA	NA	NA	NA	NA	NA	NA	NA	NA	NA	-0.612956	1	1	0
Rsph9	NA	0.498855	NA	NA	NA	-0.209619	NA	NA	NA	NA	NA	NA	1	1	0
Kcnk1	NA	-0.365347	NA	0.244752	NA	NA	NA	NA	NA	NA	NA	NA	1	1	0
Apoo	NA	-0.338817	NA	NA	NA	NA	NA	NA	NA	NA	1.41192	NA	1	1	0
Krt18	NA	-0.115185	NA	0.289611	NA	NA	NA	NA	NA	NA	NA	NA	1	1	0
Nme1	NA	-0.107132	NA	0.616052	NA	NA	NA	NA	NA	NA	NA	NA	1	1	0
Otx2	NA	-0.397738	NA	NA	NA	0.410334	NA	NA	NA	NA	NA	NA	1	1	0
Acad8	NA	-0.565046	1.2063	NA	NA	NA	NA	NA	NA	NA	NA	NA	1	1	0
Clic6	NA	-0.46018	NA	NA	NA	0.777661	NA	NA	NA	NA	NA	NA	1	1	0
Prcd	NA	-0.375097	NA	0.373418	NA	NA	NA	NA	NA	NA	NA	NA	1	1	0
Atp6v1a	NA	-0.285642	NA	0.292478	NA	NA	NA	NA	NA	NA	NA	NA	1	1	0
Slc16a2	NA	-0.320806	NA	NA	NA	NA	NA	NA	NA	NA	1.14391	NA	1	1	0
Got1	NA	-0.132972	NA	0.41886	NA	NA	NA	NA	NA	NA	NA	NA	1	1	0
Tspan33	NA	-0.352904	NA	NA	NA	0.203696	NA	NA	NA	NA	NA	NA	1	1	0
Mrps6	NA	-0.194302	NA	NA	NA	NA	NA	0.561717	NA	NA	NA	NA	1	1	0
Gpm6a	NA	-0.673129	NA	NA	NA	0.482833	NA	NA	NA	NA	NA	NA	1	1	0
Slc2a12	NA	-0.70841	NA	NA	NA	0.208702	NA	NA	NA	NA	NA	NA	1	1	0
Tmem9	NA	0.111806	NA	NA	NA	NA	NA	NA	-0.335064	NA	NA	NA	1	1	0
Tcn2	NA	-0.156333	NA	NA	NA	NA	NA	NA	NA	NA	NA	0.618276	1	1	0
Map2k2	NA	-0.938476	NA	NA	NA	NA	NA	0.105115	NA	NA	NA	NA	1	1	0
Smpd1	NA	-0.453479	NA	NA	NA	NA	NA	0.349794	NA	NA	NA	NA	1	1	0
Atp1b3	NA	0.35692	NA	NA	NA	NA	NA	-0.675387	NA	NA	NA	NA	1	1	0
Ndufab1	NA	-0.171536	NA	NA	NA	NA	NA	NA	NA	NA	NA	0.467252	1	1	0
Mgst1	NA	0.120202	NA	NA	NA	-0.720146	NA	NA	NA	NA	NA	NA	1	1	0
Lrp1	NA	-1.38312	NA	NA	NA	0.475897	NA	NA	NA	NA	NA	NA	1	1	0
Ndufs1	NA	-0.586316	NA	NA	NA	0.161888	NA	NA	NA	NA	NA	NA	1	1	0
Ttc3	NA	-0.405352	NA	NA	NA	NA	NA	NA	NA	NA	NA	0.268942	1	1	0
Tmem218	NA	0.203982	NA	NA	NA	-0.287532	NA	NA	NA	NA	NA	NA	1	1	0
Pbxip1	NA	0.25527	-0.170422	NA	NA	NA	NA	NA	NA	NA	NA	NA	1	1	0
Sdc4	NA	0.318283	NA	NA	NA	NA	NA	NA	NA	NA	NA	-0.385672	1	1	0
Mapk4	NA	-0.963905	NA	NA	NA	NA	NA	NA	NA	NA	NA	0.236759	1	1	0
Atp6v1h	NA	-0.624752	NA	NA	NA	NA	NA	0.173642	NA	NA	NA	NA	1	1	0
Tmem176a	NA	0.757312	NA	NA	NA	NA	NA	NA	NA	NA	NA	-0.190591	1	1	0
Id2	NA	-0.115442	NA	NA	NA	0.413055	NA	NA	NA	NA	NA	NA	1	1	0
Bola1	NA	0.298709	NA	NA	NA	-1.06129	NA	NA	NA	NA	NA	NA	1	1	0
Cntn1	NA	-0.195104	NA	NA	NA	0.638673	NA	NA	NA	NA	NA	NA	1	1	0
Mrps28	NA	-0.36492	NA	NA	NA	NA	NA	0.142175	NA	NA	NA	NA	1	1	0
Usp2	NA	-0.555666	NA	NA	NA	NA	NA	0.238771	NA	NA	NA	NA	1	1	0
Dcaf11	NA	-0.418924	NA	NA	NA	0.196483	NA	NA	NA	NA	NA	NA	1	1	0
1190005I06Rik	NA	0.372887	NA	NA	NA	NA	NA	-0.375221	NA	NA	NA	NA	1	1	0
Parl	NA	0.177131	-0.192616	NA	NA	NA	NA	NA	NA	NA	NA	NA	1	1	0
Dynlrb2	NA	0.118605	NA	NA	NA	-1.20269	NA	NA	NA	NA	NA	NA	1	1	0
Timm8a1	NA	-0.423643	NA	0.75086	NA	NA	NA	NA	NA	NA	NA	NA	1	1	0
Ift43	NA	0.166587	NA	NA	NA	-0.427677	NA	NA	NA	NA	NA	NA	1	1	0
Cog7	NA	-0.35881	NA	NA	NA	0.500085	NA	NA	NA	NA	NA	NA	1	1	0
Gns	NA	-0.306916	NA	NA	NA	NA	NA	0.931425	NA	NA	NA	NA	1	1	0
Prkcq	NA	-0.395958	NA	NA	NA	NA	NA	0.204131	NA	NA	NA	NA	1	1	0
Peg3	NA	-0.70686	NA	NA	NA	0.509556	NA	NA	NA	NA	NA	NA	1	1	0
Ppfibp2	NA	-0.357173	0.527583	NA	NA	NA	NA	NA	NA	NA	NA	NA	1	1	0
Aup1	NA	0.388102	NA	NA	NA	NA	NA	NA	-0.430864	NA	NA	NA	1	1	0
Dhrs3	NA	0.207108	NA	NA	NA	NA	NA	NA	-1.08356	NA	NA	NA	1	1	0
Lpgat1	NA	0.13038	NA	NA	NA	-0.434947	NA	NA	NA	NA	NA	NA	1	1	0
Ptpra	NA	0.167027	NA	NA	NA	NA	NA	NA	NA	NA	NA	-0.356242	1	1	0
Pdcd6ip	NA	-0.432599	0.375055	NA	NA	NA	NA	NA	NA	NA	NA	NA	1	1	0
Spg21	NA	-0.747363	NA	0.656294	NA	NA	NA	NA	NA	NA	NA	NA	1	1	0
Glb1	NA	-0.480492	NA	0.437406	NA	NA	NA	NA	NA	NA	NA	NA	1	1	0
Abhd14a	NA	0.193995	NA	NA	NA	-0.78926	NA	NA	NA	NA	NA	NA	1	1	0
Derl2	NA	0.128528	NA	NA	NA	NA	NA	-0.128621	NA	NA	NA	NA	1	1	0
Uap1l1	NA	-0.410576	NA	0.472252	NA	NA	NA	NA	NA	NA	NA	NA	1	1	0
Pcp4	NA	-0.749507	1.42674	NA	NA	NA	NA	NA	NA	NA	NA	NA	1	1	0
Fbxo33	NA	-0.661626	NA	0.56361	NA	NA	NA	NA	NA	NA	NA	NA	1	1	0
[truncated: 6,068 more rows]
